# Supplementary material for: Synthesis and characterization of chlorotriarylbismuthonium salts
Source: Royal Society of Chemistry journal article supplement (doi:10.1039/d4cc03364g), 2024-01-01

## Supporting Information

# Synthesis and Characterization of Chlorotriarylbiomuthonium Salts

Jennifer Kuziola, Nils Nöthling, Markus Leutzsch, Josep Cornella

Max-Planck-Institut für Kohlenforschung, Kaiser-Wilhelm-Platz 1,  
Mülheim an der Ruhr, 45470, Germany

[cornella@kofo.mpg.de](mailto:cornella@kofo.mpg.de)

## Table of Contents

|                                                                                                                                                                                                              |           |
|--------------------------------------------------------------------------------------------------------------------------------------------------------------------------------------------------------------|-----------|
| <b>1. General methods</b>                                                                                                                                                                                    | <b>3</b>  |
| <b>2. Synthesis of Triarylbi-muth Complex</b>                                                                                                                                                                | <b>4</b>  |
| 2.1 Synthesis and characterization data of tris(3,5-di-methylphenyl)bismuthane ( <b>2</b> )                                                                                                                  | 4         |
| <b>3. Synthesis of Triarylbi-muth(V) dichlorides</b>                                                                                                                                                         | <b>5</b>  |
| 3.1 Characterization data of triphenylbismuth dichloride ( <b>5</b> )                                                                                                                                        | 5         |
| 3.2 Characterization data of tris(3,5-di-methylphenyl)bismuth dichloride ( <b>6</b> )                                                                                                                        | 6         |
| 3.3 Characterization data of tris(3,5-di-tert-butylphenyl)bismuth dichloride ( <b>7</b> )                                                                                                                    | 6         |
| 3.4 Characterization data of trimesitylbismuth dichloride ( <b>8</b> )                                                                                                                                       | 6         |
| 3.5 SC-XRD of triaryldibismuth dichlorides <b>6</b> , <b>7</b> and <b>8</b>                                                                                                                                  | 7         |
| <b>4. Synthesis of high-valent chlorobismuthonium tetrakis [3,5 bis(trifluoromethyl) phenyl]borate salts</b>                                                                                                 | <b>8</b>  |
| 4.1 Characterization data of $[\text{Ph}_3\text{BiCl}][\text{BAr}^{\text{F}}]$ ( <b>9</b> ) and $[(\text{Ph}_3\text{BiCl}_2)\text{Cl}][\text{BAr}^{\text{F}}]$ ( <b>9a</b> )                                 | 8         |
| 4.2 Characterization data of $[m\text{-Xyl}_3\text{BiCl}][\text{BAr}^{\text{F}}]$ ( <b>10</b> ) and $[(m\text{-Xyl}_3\text{BiCl}_2)\text{Cl}][\text{BAr}^{\text{F}}]$ ( <b>10a</b> )                         | 9         |
| 4.3 Characterization data of $[3,5\text{-}^t\text{BuAr}_3\text{BiCl}][\text{BAr}^{\text{F}}]$ ( <b>11</b> ) and $[(3,5\text{-}^t\text{BuAr}_3\text{BiCl}_2)\text{Cl}][\text{BAr}^{\text{F}}]$ ( <b>11a</b> ) | 10        |
| 4.4 Characterization data of $[\text{Mes}_3\text{BiCl}][\text{BAr}^{\text{F}}]$ ( <b>12</b> )                                                                                                                | 11        |
| <b>5. Reactivity of Chlorotimesitylbismuthonium salt (<b>13</b>)</b>                                                                                                                                         | <b>12</b> |
| <b>6. DOSY Experiments</b>                                                                                                                                                                                   | <b>13</b> |
| <b>7. Determination of Lewis acidity</b>                                                                                                                                                                     | <b>16</b> |
| <b>8. Polymerization of THF-<math>d_8</math></b>                                                                                                                                                             | <b>19</b> |
| <b>9. X-ray Data</b>                                                                                                                                                                                         | <b>22</b> |
| <b>10. References</b>                                                                                                                                                                                        | <b>84</b> |
| <b>11. NMR Data</b>                                                                                                                                                                                          | <b>85</b> |

## 1. General methods

Unless otherwise stated, all manipulations were performed using standard Schlenk techniques under dry argon in flame-dried glassware or in a MBraun argon-filled glove box.

Anhydrous solvents were distilled from appropriate drying agents and were transferred under Ar (DCM and *n*-pentane (CaH<sub>2</sub>), CDCl<sub>3</sub> (molecular sieves)) and stored over 4 Å molecular sieves under argon prior to use. Anhydrous BiCl<sub>3</sub> (99.9%, trace metal basis) and NaBAr<sup>F</sup> were purchased from Alfa Aesar, BiPh<sub>3</sub> was purchased from abcr. Trimesitylbismuth and tris(3,5-di-*tert*-butylphenyl)bismuthane have been synthesized by the reported method.<sup>1</sup>

NMR data were recorded using a Bruker AVIII HD 300 MHz, Bruker AVIII HD 400 MHz, Bruker AVIII 500 MHz or Bruker AVNeo 600 MHz NMR spectrometer. Chemical shifts ( $\delta$ ) are given in ppm, relative to deuterated solvent residual peak, and coupling constants ( $J$ ) provided in Hz. <sup>1</sup>H and <sup>13</sup>C chemical shifts  $\delta$  are reported relative to the solvent residual peaks as an internal reference. For <sup>1</sup>H NMR the following residual proton peaks of the deuterated solvents were used: CDCl<sub>3</sub>,  $\delta_{\text{H}} = 7.260$  ppm, CD<sub>2</sub>Cl<sub>2</sub> = 5.320 ppm and for <sup>13</sup>C NMR: CDCl<sub>3</sub>,  $\delta = 77.16$  ppm. <sup>19</sup>F NMR data measured at 585 MHz was generally measured without <sup>1</sup>H decoupling.

## 2. Synthesis of Triarylbi-muth Complex

Trimesitylbismuth and tris(3,5-di-*tert*-butylphenyl)bismuthane have been synthesized by the reported method,<sup>1</sup> while triphenylbismuth was commercially available.

### 2.1 Synthesis and characterization data of tris(3,5-di-methylphenyl)bismuthane (2)

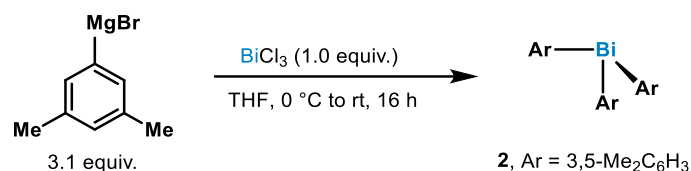

**Procedure:** A flame-dried Schlenk-flask was charged with activated magnesium turnings (214.7 mg, 8.8 mmol, 1.2 equiv.) and dissolved in anhydrous THF (0.5 mL), followed by the addition of iodine and 0.5 mL of 5-bromo-xylene (0.37 mmol). The mixture was gently heated with a heat gun (70 °C) and a solution of the remaining 5-bromo-xylene (0.95 mL, 7 mmol, in total: 1.0 equiv.) in anhydrous THF (15 mL) was slowly added. The mixture was placed in an oil bath and heated at 70 °C for 3 h. Then, the solution was cooled to room temperature, additional 10 mL of anhydrous THF were added. The mixture was cooled to 0 °C and BiCl<sub>3</sub> was added in one portion. The reaction was allowed to warm up to room temperature and stirred overnight. The solvent was evaporated under reduced pressure and the crude mixture was extracted with anhydrous *n*-pentane (3× 10 mL). The removal of pentane under vacuum afforded tris(3,5-di-methylphenyl)bismuth (2). **Yield:** 88% (1.02 g)

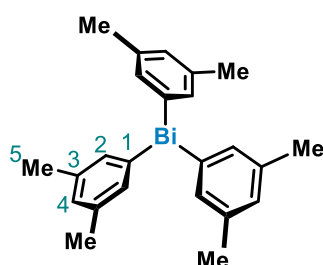

<sup>1</sup>H NMR (300 MHz, CDCl<sub>3</sub>) δ 7.41 (s, 6H, *H*-2), 6.95 (s, 3H, *H*-4), 2.27 (s, 18H, *H*-5).

<sup>13</sup>C NMR (75 MHz, CDCl<sub>3</sub>) δ 154.9 (*C*-1), 139.7 (*C*-3), 135.32 (*C*-4), 129.6 (*C*-2), 21.5 (*C*-5).

HRMS (ESI) calc'd for C<sub>24</sub>H<sub>27</sub>Bi<sub>1</sub> [M]<sup>+</sup> 524.191160, found 524.191148.

**SC-XRD:** Crystal of sufficient quality for SC-XRD were obtained *via* liquid-liquid diffusion of pentane into a concentrated solution of complex 2 in CH<sub>2</sub>Cl<sub>2</sub> at +23 °C.

### 3. Synthesis of Triarylbismuth(V) dichlorides

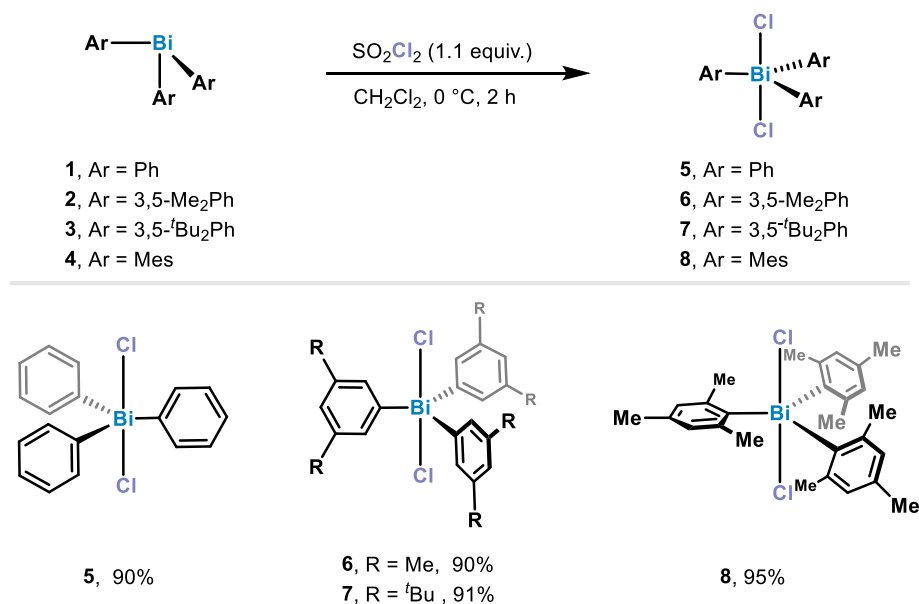

**Scheme S1.** Overview of the synthesized triarylbismuth dichlorides.

**General procedure:** An oven dried vial with a septum cap was charged with the corresponding triarylbismuthane (1.0 equiv.) under an Ar atmosphere and dissolved in anhydrous CH<sub>2</sub>Cl<sub>2</sub>, followed by the addition of SO<sub>2</sub>Cl<sub>2</sub> (1.3 equiv.). The reaction was stirred for 2 h at room temperature and the solvent was evaporated via schlenk vacuum, affording the corresponding triarylbismuth dichloride.

#### 3.1 Characterization data of triphenylbismuth dichloride (5)

Compound **5** was prepared following the general procedure from triphenylbismuth (**1**) (1.0 g, 2.38 mmol, 1.0 equiv.) and SO<sub>2</sub>Cl<sub>2</sub> (0.3 mL, 3.1 mmol, 1.3 equiv.) in 20 mL of anhydrous CH<sub>2</sub>Cl<sub>2</sub>. Yield: 90% (1.1 g)

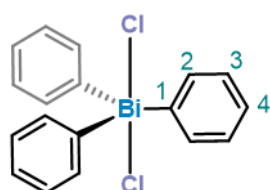

<sup>1</sup>H NMR (300 MHz, CDCl<sub>3</sub>) δ 8.63 – 8.46 (m, 6H, H-Ar), 7.67 (m, 6H, H-Ar), 7.62 – 7.44 (m, 3H, H-4).

<sup>13</sup>C NMR (75 MHz, CDCl<sub>3</sub>) δ 156.1 (C-1), 134.7 (C-Ar), 131.9 (C-Ar), 131.7 (C-4).

HRMS (ESI) calc'd for C<sub>18</sub>H<sub>15</sub>BiCl<sub>2</sub>Na<sub>1</sub> [M+Na]<sup>+</sup> 533.02526, found 533.02470

### 3.2 Characterization data of tris(3,5-di-methylphenyl)bismuth dichloride (**6**)

Compound **6** was prepared following the general procedure from tris(3,5-di-methylphenyl)bismuth (**2**) (120 mg, 0.22 mmol, 1.0 equiv.) and SO<sub>2</sub>Cl<sub>2</sub> (24.2 μL, 0.3 mmol, 1.3 equiv.) in 12 mL of anhydrous CH<sub>2</sub>Cl<sub>2</sub>. Yield: 90% (123 mg)

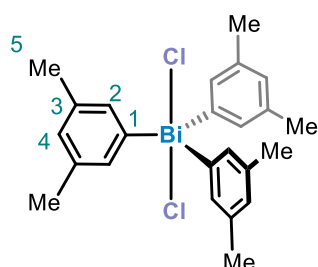

<sup>1</sup>H NMR (500 MHz, CDCl<sub>3</sub>) δ 8.06 (s, 6H, *H*-2), 7.14 (s, 3H, *H*-4), 2.39 (s, 18H, *H*-5).

<sup>13</sup>C NMR (101 MHz, CDCl<sub>3</sub>) δ 155.8 (*C*-1), 141.7 (*C*-3), 133.3 (*C*-4), 131.9 (*C*-2), 21.9 (*C*-5).

HRMS (ESI) calc'd for C<sub>24</sub>H<sub>27</sub>BiCl<sub>2</sub>Na<sub>1</sub> [M+Na]<sup>+</sup> 617.11917, found 617.11860.

SC-XRD: Crystal of sufficient quality for SC-XRD were obtained *via* liquid-liquid diffusion of pentane into a concentrated solution of complex **6** in dichloromethane at +23 °C.

### 3.3 Characterization data of tris(3,5-di-tert-butylphenyl)bismuth dichloride (**7**)

Compound **7** was prepared following the general procedure from tris(3,5-di-tert-butylphenyl)bismuth (**3**) (52 mg, 0.07 mmol, 1.0 equiv.) and SO<sub>2</sub>Cl<sub>2</sub> (7.3 μL, 0.09 mmol, 1.3 equiv.) in 5 mL of anhydrous CH<sub>2</sub>Cl<sub>2</sub>. Yield: 95% (53.7 mg).

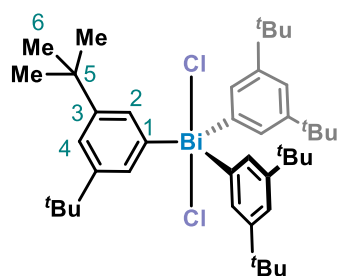

<sup>1</sup>H NMR (300 MHz, CDCl<sub>3</sub>) δ 8.40 (d, *J* = 1.6 Hz, 6H, *H*-2), 7.53 (t, *J* = 1.6 Hz, 3H, *H*-4), 1.37 (s, 27H, *H*-5).

<sup>13</sup>C NMR (75 MHz, CDCl<sub>3</sub>) δ 157.4 (*C*-1), 154.4 (*C*-3), 129.0 (*C*-4), 125.4 (*C*-2), 36.1 (*C*-5), 31.5 (*C*-6).

HRMS (ESI) calc'd for C<sub>42</sub>H<sub>63</sub>BiCl<sub>2</sub>Na<sub>1</sub> [M+Na]<sup>+</sup> 869.39991, found 869.40030.

SC-XRD: Crystal of sufficient quality for SC-XRD were obtained *via* liquid-liquid diffusion of pentane into a concentrated solution of complex **7** in CH<sub>2</sub>Cl<sub>2</sub> at +23 °C.

### 3.4 Characterization data of trimesitylbismuth dichloride (**8**)

Compound **8** was prepared following the general procedure from trimesitylbismuth (**4**) (70 mg, 1.23 mmol, 1.0 equiv.) and SO<sub>2</sub>Cl<sub>2</sub> (16 μL, 0.16 mmol, 1.3 equiv.) in 7 mL of anhydrous CH<sub>2</sub>Cl<sub>2</sub>. Yield: 90% (71 mg).

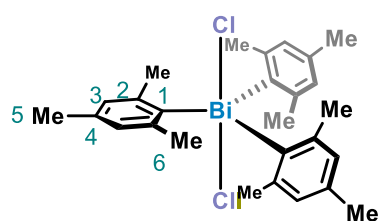

$^1\text{H}$  NMR (400 MHz,  $\text{CDCl}_3$ )  $\delta$  7.16 (s, 6H, *H*-3), 2.71 (s, 18H *H*-6), 2.32 (s, 9H, *H*-5).

$^{13}\text{C}$  NMR (101 MHz,  $\text{CDCl}_3$ )  $\delta$  167.8 (*C*-1), 142.0 (*C*-2), 141.3 (*C*-4), 132.3 (*C*-3), 25.6 (*C*-6), 21.0 (*C*-5).

HRMS (ESI) calc'd for  $\text{C}_{27}\text{H}_{32}\text{BiCl}_2$  [*M*] 635.16742, found 635.16796.

SC-XRD: Crystal of sufficient quality for SC-XRD were obtained *via* liquid-liquid diffusion of pentane into a concentrated solution of complex **8** in  $\text{CH}_2\text{Cl}_2$  at +23 °C.

### 3.5 SC-XRD of triaryldibismuth dichlorides **6**, **7** and **8**

Complexes **5** and **8** are known,<sup>2,3</sup> **6** and **7** represent new structures.

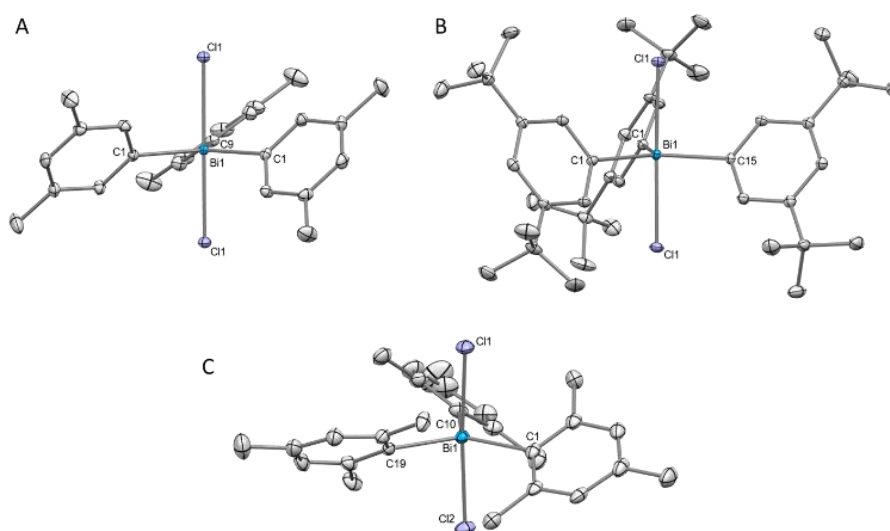

**Figure S1.** Solid state of structure of **6** (A), **7** (B)<sup>4</sup> and **8** (C)<sup>4</sup>. Ellipsoids are drawn at the 50% probability level. H atoms are omitted for clarity. Selected bond lengths (Å) and angles (°): (A) **6**, Bi1–C1: 2.1980(15), Bi1–C9: 2.202(2), Bi1–C11: 2.5898(4), C11–Bi1–C11, 177.391(18). (B) **7**, Bi1–C1: 2.221(2), Bi1–C15: 2.212(3), Bi1–C11, 2.5954(5), C11–Bi1–C11, 178.59(3). Selected bond lengths (Å) and angles (°) are the average of two molecules in the asymmetric unit cell: (C), **8**: Bi1–C1:2.239(3), Bi1–C19: 2.2315(3), Bi1–C10: 2.235(3), Bi1–C11: 2.5977(8), Bi1–C12: 2.63265(8), C11–Bi1–C12: 175.94(3).

Structures **6**, **7** and **8** adopt a slightly distorted trigonal bipyramidal geometry with the chloride atoms occupying the apical positions. The Bi1–C11 bond lengths of **6**, **7** and **8** are in the range of the unsubstituted  $\text{Ph}_3\text{BiCl}_2$  [**5**: 2.5896(10) Å;<sup>2</sup> **6**: 2.5898(4); **7**: Bi1–C11 = 2.5954(5) Å; **8**: 2.6151(8) Å;]. Whereas the fluorinated analogues  $^t\text{BuAr}_3\text{BiF}_2$  ( $^t\text{BuAr}$  = 3,5-*t*Bu<sub>2</sub>-C<sub>6</sub>H<sub>3</sub>) and  $\text{Mes}_3\text{BiF}_2$  (Mes = 2,4,6-Me<sub>3</sub>-C<sub>6</sub>H<sub>3</sub>) display a quasi-linear F–Bi–F axis [ $^t\text{BuAr}_3\text{BiF}_2$ : 179.1(2)°;  $\text{Mes}_3\text{BiF}_2$ : 179.00(5)°],<sup>1</sup> complexes **6**, **7** and **8** exhibit deviations from linearity with Cl–Bi–Cl angles of 177.391(18)° (**6**), 178.59(3)° (**7**) and 175.94(3)° (**8**). The replacement of the more electronegative fluoride ligands with chlorine atoms leads to a distinct organization of the aryl groups, adopting rather a propeller-like configuration in all cases.

This effect can be attributed to the weaker interactions of the *ortho* C–H bonds with the Cl as a result of the lower electronegativity compared to fluorine.

#### 4. Synthesis of high-valent chlorobismuthonium tetrakis [3,5 bis(trifluoromethyl) phenyl]borate salts

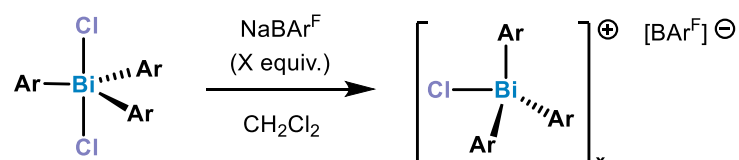

[Ar = Ph, 3,5-Me<sub>2</sub>-C<sub>6</sub>H<sub>3</sub>, 3,5-<sup>t</sup>Bu<sub>2</sub>-C<sub>6</sub>H<sub>3</sub>, Mes]

**General procedure:** In the glovebox, an oven dried vial with a septum cap was charged with the corresponding triarylbismuth dichloride (1.0 equiv.) and either 1.0 or 0.5 equiv. of NaBAR<sup>F</sup>, followed by the addition of 5 mL of anhydrous dichloromethane. The reaction was stirred for 2 h at room temperature and the precipitate was filtered off via a syringe filter. The solvent was evaporated under reduced pressure via the Schlenk line, affording the corresponding triarylbismuth dichloride.

##### 4.1 Characterization data of [Ph<sub>3</sub>BiCl][BAR<sup>F</sup>] (**9**) and [(Ph<sub>3</sub>BiCl<sub>2</sub>)Cl][BAR<sup>F</sup>] (**9a**)

**Addition of 1.0 equiv. of NaBAR<sup>F</sup>:** Prepared according to the general procedure from triphenylbismuth dichloride (**1**) (50 mg, 0.08 mmol, 1.0 equiv.) and NaBAR<sup>F</sup> (52 mg, 0.06 mmol, 1.0 equiv.) in 5 mL of anhydrous dichloromethane. The analytical data refer to the formal monomeric chlorobismuthonium species (**9**) in solution. **Yield:** 48 mg

<sup>1</sup>H NMR (300 MHz, CDCl<sub>3</sub>) δ 7.83 – 7.62 (m, 23H, BAR<sup>F</sup>, *H*-1/ *H*-2/ *H*-3/*H*-4), 7.47 (s, 4H, BAR<sup>F</sup>).

<sup>13</sup>C NMR (101 MHz, CDCl<sub>3</sub>) δ 161.8 (q, *J* = 49.8 Hz, BAR<sup>F</sup>), 148.3 (*C*-1), 134.9 (BAR<sup>F</sup>), 134.5 (*C*-Ar), 134.3 (*C*-4), 133.9 (*C*-Ar), 129.6 – 128.8 (m) (BAR<sup>F</sup>), 124.7 (q, *J* = 272.6 Hz, BAR<sup>F</sup>), 118.2 – 116.9 (m) (BAR<sup>F</sup>).

<sup>19</sup>F NMR (282 MHz, CDCl<sub>3</sub>) δ –62.3.

HRMS (ESI): calc'd for C<sub>18</sub>H<sub>15</sub>BiCl<sub>1</sub> [M]<sup>+</sup> 475.06608, found 475.06619.

**Addition of 0.5 equiv. of NaBAR<sup>F</sup>:** Prepared according to the general procedure from triphenylbismuth dichloride (**1**) (50 mg, 0.08 mmol, 1.0 equiv.) and NaBAR<sup>F</sup> (17.3 mg, 0.09 mmol, 0.5 equiv.) in 5 mL of anhydrous dichloromethane. The analytical data refer to the dimeric chlorobismuthonium species (**9a**) in solution and solid-state. **Yield:** 87% (43.3 mg)



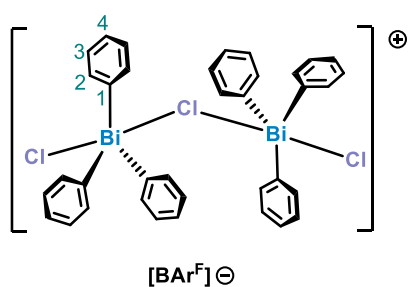

$^1\text{H NMR}$  (600 MHz,  $\text{CDCl}_3$ )  $\delta$  7.99 – 7.94 (m, 12H,  $H-2$ ), 7.72 – 7.69 (m, 8H,  $\text{BAR}^{\text{F}}$ ), 7.61 (m, 12H,  $H-3$ ), 7.59 – 7.54 (m, 6H,  $H-4$ ), 7.49 (s, 4H,  $\text{BAR}^{\text{F}}$ ).

$^{13}\text{C NMR}$  (151 MHz,  $\text{CDCl}_3$ )  $\delta$  161.9 (q,  $J = 49.8$  Hz,  $\text{BAR}^{\text{F}}$ ), 153.7 (C-1), 134.9 ( $\text{BAR}^{\text{F}}$ ), 134.3 (C-2), 133.0 (C-3), 132.9 (C-4), 129.0 (qq,  $J = 31.5, 2.8$  Hz,  $\text{BAR}^{\text{F}}$ ), 124.7 (q,  $J = 272.5$  Hz,  $\text{BAR}^{\text{F}}$ ), 117.6

(hept,  $J = 4.0$  Hz,  $\text{BAR}^{\text{F}}$ ).

$^{19}\text{F NMR}$  (565 MHz,  $\text{CDCl}_3$ )  $\delta$  –62.4.

HRMS (ESI): calc'd for  $\text{C}_{36}\text{H}_{30}\text{Bi}_2\text{Cl}_3$   $[\text{M}]^+$  985.10224, found 958.10156.

SC-XRD: Crystal of sufficient quality for SC-XRD was obtained *via* liquid-liquid diffusion of pentane into a concentrated solution of complex **9a** in  $\text{CH}_2\text{Cl}_2$  at +23 °C.

#### 4.2 Characterization data of $[\text{m-Xyl}_3\text{BiCl}][\text{BAR}^{\text{F}}]$ (**10**) and $[(\text{m-Xyl}_3\text{BiCl}_2)\text{Cl}][\text{BAR}^{\text{F}}]$ (**10a**)

**Addition of 1.0 equiv. of  $\text{NaBAR}^{\text{F}}$ :** Prepared according to the general procedure from **6** (50 mg, 0.084 mmol, 1.0 equiv.) and  $\text{NaBAR}^{\text{F}}$  (78.1 mg, 0.088 mmol, 1.05 equiv.) in 5 mL of anhydrous dichloromethane. The analytical data refer to the monomeric chlorobismuthonium species in solution and solid-state. Yield: 91.4 % (64 mg)

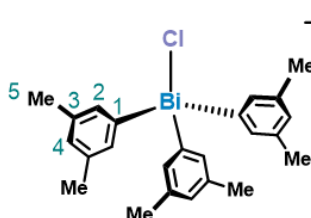

$^1\text{H NMR}$  (600 MHz,  $\text{CDCl}_3$ )  $\delta$  7.73 – 7.61 (m, 8H,  $\text{BAR}^{\text{F}}$ ), 7.47 (s, 4H,  $\text{BAR}^{\text{F}}$ ), 7.38 (s, 6H,  $H-2$ ), 7.33 – 7.29 (m, 3H,  $H-4$ ), 2.38 – 2.36 (m, 18H,  $H-5$ ).

$^{13}\text{C NMR}$  (151 MHz,  $\text{CDCl}_3$ )  $\delta$  161.8 (q,  $J = 49.9$  Hz,  $\text{BAR}^{\text{F}}$ ), 146.1–145.1 (C-1), 144.8 (C-3), 136.5 (C-4), 134.9 ( $\text{BAR}^{\text{F}}$ ), 131.3 (C-2), 129.9 – 128.5 (m) ( $\text{BAR}^{\text{F}}$ ), 124.6 (q,  $J = 272.6$  Hz,  $\text{BAR}^{\text{F}}$ ), 118.5 – 115.9 (m) ( $\text{BAR}^{\text{F}}$ ), 21.8 (C-5).

$^{19}\text{F NMR}$  (565 MHz,  $\text{CDCl}_3$ )  $\delta$  –62.4.

HRMS (ESI): calc'd for  $\text{C}_{24}\text{H}_{27}\text{BiCl}_1$   $[\text{M}]^+$  559.16011, found 559.15998.

SC-XRD: Crystal of sufficient quality for SC-XRD was obtained *via* liquid-liquid diffusion of pentane into a concentrated solution of complex **10** in  $\text{CH}_2\text{Cl}_2$  at –18 °C.

**Addition of 0.5 equiv. of  $\text{NaBAR}^{\text{F}}$ :** Prepared according to the general procedure from **6** (47 mg, 0.08 mmol, 1.0 equiv.) and  $\text{NaBAR}^{\text{F}}$  (35.1 mg, 0.04 mmol, 0.5 equiv.) in 5 mL of anhydrous dichloromethane. The analytical data refer to the formal dimeric chlorobismuthonium species (**10a**) in solution. Yield: 62 mg

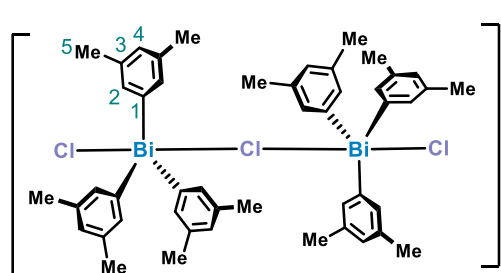

$^1\text{H NMR}$  (400 MHz,  $\text{CDCl}_3$ )  $\delta$  7.74 – 7.68 (m, 8H,  $\text{BAR}^{\text{f}}$ ), 7.61 (s, 12H,  $H-2$ ), 7.50 (s, 4H,  $\text{BAR}^{\text{f}}$ ), 7.16 (s, 6H,  $H-4$ ), 2.26 (s, 36H,  $H-5$ ).

$^{13}\text{C NMR}$  (101 MHz,  $\text{CDCl}_3$ )  $\delta$  161.8 (q,  $J = 49.9$  Hz,  $\text{BAR}^{\text{f}}$ ), 153.4 (C-1), 143.0 (C-3), 135.0 ( $\text{BAR}^{\text{f}}$ ), 134.4 (C-4), 131.4 (C-2), 129.7 – 128.3 (m) ( $\text{BAR}^{\text{f}}$ ), 124.7 (q,  $J = 272.4$  Hz,  $\text{BAR}^{\text{f}}$ ), 118.0 – 116.9 (m) ( $\text{BAR}^{\text{f}}$ ), 21.7 (C-5).

$^{19}\text{F NMR}$  (282 MHz,  $\text{CDCl}_3$ )  $\delta$  –62.3.

Based on the HRMS analysis several species have been detected:

1. HRMS (ESI): calc'd for  $\text{C}_{24}\text{H}_{27}\text{Bi}_1\text{Cl}_1$   $[\text{M}]^+$  559.15995, found 559.15998.
2. HRMS (ESI): calc'd for  $\text{C}_{48}\text{H}_{54}\text{Bi}_2\text{Cl}_3$   $[\text{M}]^+$  1153.28936, found 1153.28963.

#### 4.3 Characterization data of $[\text{3,5-}^t\text{BuAr}_3\text{BiCl}][\text{BAR}^{\text{f}}]$ (**11**) and $[(\text{3,5-}^t\text{BuAr}_3\text{BiCl}_2)\text{Cl}][\text{BAR}^{\text{f}}]$ (**11a**)

**Addition of 1.0 equiv. of  $\text{NaBAR}^{\text{f}}$ :** Prepared according to the general procedure from complex **7** (50 mg, 0.06 mmol, 1.0 equiv.) and  $\text{NaBAR}^{\text{f}}$  (52mg, 0.06 mmol, 1.0 equiv.) in 5 mL of anhydrous dichloromethane. The analytical data refer to the monomeric chlorobismuthonium species (**11**) in solution and the yield is based on the dinuclear structure in solid state. **Yield:** 79 % (59 mg)

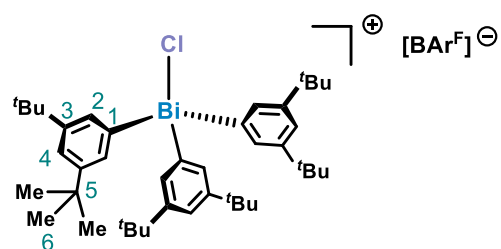

$^1\text{H NMR}$  (600 MHz,  $\text{CDCl}_3$ )  $\delta$  7.80 (t,  $J = 1.6$  Hz, 3H,  $H-4$ ), 7.69 – 7.64 (m, 8H,  $\text{BAR}^{\text{f}}$ ), 7.62 (d,  $J = 1.6$  Hz, 6H,  $H-2$ ), 7.46 (s, 4H,  $\text{BAR}^{\text{f}}$ ), 1.34 (s, 54H,  $H-6$ ).

$^{13}\text{C NMR}$  (151 MHz,  $\text{CDCl}_3$ )  $\delta$  161.83 (q,  $J = 49.9$  Hz,  $\text{BAR}^{\text{f}}$ ), 157.9 (C-3), 147.5 (bs, C-1), 134.9 ( $\text{BAR}^{\text{f}}$ ), 129.1 (C-4), 128.9 (qq,  $J = 31.5, 2.8$  Hz,  $\text{BAR}^{\text{f}}$ ), 128.1 (C-2), 124.7 (q,  $J = 272.6$  Hz,  $\text{BAR}^{\text{f}}$ ), 117.5 (hept,  $J = 4.0$  Hz,  $\text{BAR}^{\text{f}}$ ), 36.5 (C-5), 31.2 (C-6).

$^{19}\text{F NMR}$  (564 MHz,  $\text{CDCl}_3$ )  $\delta$  –62.4.

Based on the HRMS analysis several species have been detected:

1. HRMS (ESI): 811.44 =  $[\text{C}_{42}\text{H}_{63}\text{Bi}_1\text{Cl}_1]^+$  (**11**) equal to  $[\text{C}_{42}\text{H}_{63}\text{Bi}_1\text{Cl}_2 - \text{Cl}]^+$  (**7**);

HRMS (ESI): calc'd for  $\text{C}_{42}\text{H}_{63}\text{Bi}_1\text{Cl}_1$   $[\text{M}]^+$  811.44131, found 811.44168.

2. HRMS (ESI): calc'd for  $\text{C}_{84}\text{H}_{126}\text{Bi}_2\text{Cl}_3$   $[\text{M}]^+$  1657.85177, found 1657.85276. (**11a**)

**SC-XRD:** Crystal of sufficient quality for SC-XRD were obtained *via* liquid-liquid diffusion of pentane into a concentrated solution of complex **11** in  $\text{CH}_2\text{Cl}_2$  at  $-18$  °C, affording dimeric Bi complex **11a**.

**Addition of 0.5 equiv. of NaBAR<sup>F</sup>:** Prepared according to the general procedure from complex **7** (30 mg, 0.035 mmol, 1.0 equiv.) and NaBAR<sup>F</sup> (15.7mg, 0.017 mmol, 0.5 equiv.) in 5 mL of anhydrous dichloromethane. The analytical data refer to the dimeric chlorobismuthonium species in solution and the yield is based on the dinuclear structure in solid state. Yield: 88% (45 mg)

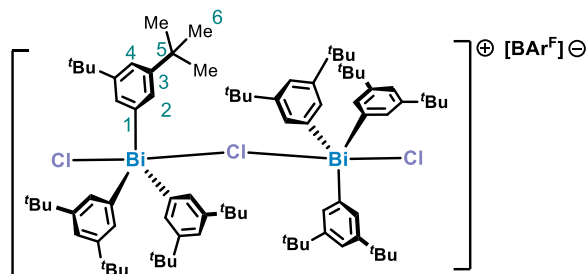

<sup>1</sup>H NMR (600 MHz, CDCl<sub>3</sub>) δ 7.94 (s, 12H, *H*-2), 7.68 (m, *J* = 5.2, 2.2 Hz, 8H, *BAR*<sup>F</sup>), 7.63 (d, *J* = 1.6 Hz, 6H, *H*-4), 7.48 (s, 4H, *BAR*<sup>F</sup>), 1.29 (s, 108H, *H*-6).

<sup>13</sup>C NMR (151 MHz, CDCl<sub>3</sub>) δ 161.9 (q, *J* = 49.9 Hz, *BAR*<sup>F</sup>), 156.2 (*C*-3), 153.3 (*C*-1), 134.9 (*BAR*<sup>F</sup>),

129.0 (qq, *J* = 31.4, 2.9 Hz, *BAR*<sup>F</sup>), 128.6 (*C*-2), 127.1 (*C*-4), 124.7 (q, *J* = 272.4 Hz, *BAR*<sup>F</sup>), 119.7 – 116.6 (m) (*BAR*<sup>F</sup>), 36.3 (*C*-5), 31.4 (*C*-6).

<sup>19</sup>F NMR (564 MHz, CDCl<sub>3</sub>) δ –62.3.

Based on the HRMS analysis several species have been detected:

1. HRMS (ESI): 811.44 = [C<sub>42</sub>H<sub>63</sub>Bi<sub>1</sub>Cl<sub>1</sub>]<sup>+</sup> (**11**) equal to [C<sub>42</sub>H<sub>63</sub>Bi<sub>1</sub>Cl<sub>2</sub> – Cl]<sup>+</sup> (**7**);

HRMS (ESI): calc'd for C<sub>42</sub>H<sub>63</sub>Bi<sub>1</sub>Cl<sub>1</sub> [M]<sup>+</sup> 811.44131, found 811.44168.

2. HRMS (ESI): calc'd for C<sub>84</sub>H<sub>126</sub>Bi<sub>2</sub>Cl<sub>3</sub> [M]<sup>+</sup> 1657.85177, found 1657.85276. (**11a**)

#### 4.4 Characterization data of [Mes<sub>3</sub>BiCl][BAR<sup>F</sup>] (**12**)

**Addition of 1.0 equiv. of NaBAR<sup>F</sup>:** Prepared according to the general procedure from complex **8** (50 mg, 0.08 mmol, 1.0 equiv.) and NaBAR<sup>F</sup> (73 mg, 0.08 mmol, 1.0 equiv.) in 5 mL of anhydrous dichloromethane. Yield: 90% (104 mg)

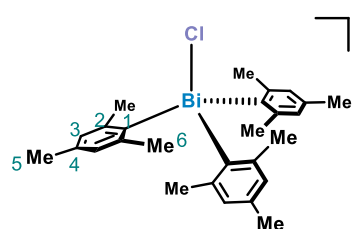

<sup>1</sup>H NMR (400 MHz, CDCl<sub>3</sub>) δ 7.71 – 7.66 (m, 8H, *BAR*<sup>F</sup>), 7.49 (s, 4H, *BAR*<sup>F</sup>), 7.27 (s, 6H, *H*-3), 2.42 (s, 18H, *H*-6), 2.34 (s, 9H, *H*-5).

<sup>13</sup>C NMR (101 MHz, CDCl<sub>3</sub>) δ 161.8 (q, *J* = 49.9 Hz, *BAR*<sup>F</sup>),

157.5 (*C*-1), 145.5, (*C*-4), 141.9 (*C*-2), 134.9 (*BAR*<sup>F</sup>), 133.8 (*C*-3), 129.1 (qq, *J* = 31.6, 2.8 Hz, *BAR*<sup>F</sup>), 124.6 (q, *J* = 272.5 Hz, *BAR*<sup>F</sup>), 117.6 (hept, *J* = 4.0 Hz, *BAR*<sup>F</sup>), 24.6 (*C*-6), 21.1 (*C*-5).

<sup>19</sup>F NMR (282 MHz, CDCl<sub>3</sub>) δ –62.4.

HRMS (ESI) calc'd for C<sub>27</sub>H<sub>33</sub>BiCl<sub>1</sub> [M-*BAR*<sup>F</sup>]<sup>+</sup> 601.20621, found 601.20693.

## 5. Reactivity of Chlorotrimesitylbismuthonium salt (**13**)

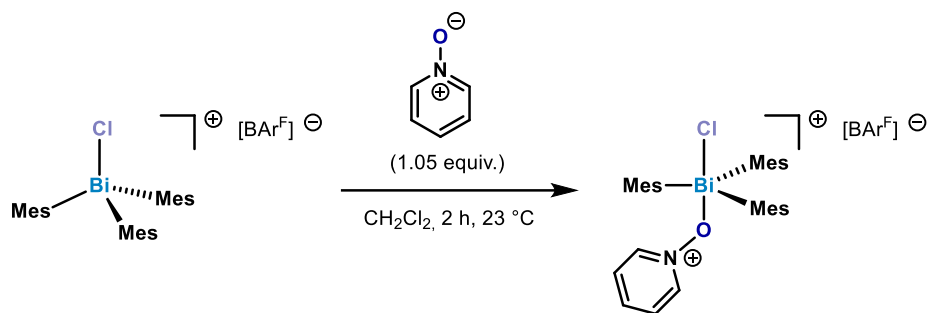

**Procedure:** In the glovebox, an oven dried vial with a septum cap was charged with the corresponding chlorotrimesitylbismuthonium salt (**12**) (50 mg, 0.03 mmol, 1.0 equiv.) and pyridine-N-oxide (3.4 mg, 0.04 mmol, 1.05 equiv.), followed by the addition of 5 mL of anhydrous dichloromethane. The reaction was stirred for 2 h at room temperature, and afterwards the solvent was evaporated under reduced pressure using the Schlenk line, affording a light yellowish solid. **Yield:** 87.7 % (46.7 mg)

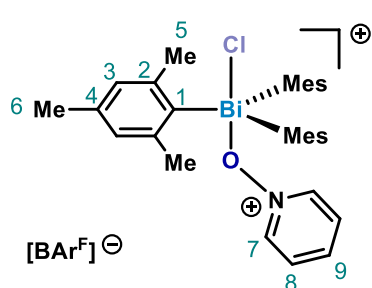

$^1\text{H NMR}$  (600 MHz,  $\text{CDCl}_3$ )  $\delta$  7.98 (d,  $J = 6.1$  Hz, 2H,  $H-7$ ), 7.72 – 7.66 (m, 8H,  $\text{BAr}^{\text{F}}$ ), 7.52 (t,  $J = 7.7$  Hz, 1H,  $H-9$ ), 7.50 (s, 4H,  $\text{BAr}^{\text{F}}$ ), 7.38 – 7.31 (m, 2H,  $H-8$ ), 7.22 (s, 6H,  $H-3$ ), 2.55 (s, 18H,  $H-5$ ), 2.33 (s, 9H,  $H-6$ ).

$^{13}\text{C NMR}$  (151 MHz,  $\text{CDCl}_3$ )  $\delta$  163.3 (C-1), 161.8 (q,  $J = 49.9$  Hz,  $\text{BAr}^{\text{F}}$ ), 143.4 (C-4), 142.0 (C-2), 139.0 (C-7), 134.9 (m) ( $\text{BAr}^{\text{F}}$ ), 133.1 (C-3), 132.8 (bs) (C-9), 129.1 (qq,  $J = 31.5, 2.8$  Hz,  $\text{BAr}^{\text{F}}$ ), 127.3 (C-8), 124.6 (q,  $J = 272.7$  Hz,  $\text{BAr}^{\text{F}}$ ), 117.6 (hept,  $J = 4.0$  Hz,  $\text{BAr}^{\text{F}}$ ), 25.0 (C-5), 21.0 (C-6).

$^{19}\text{F NMR}$  (565 MHz,  $\text{CDCl}_3$ )  $\delta$  -62.5.

The connectivity of the pyridine-N-oxide with the Bi-species is supported based on a NOESY cross peak between  $H-5$  and  $H-7$ . The carbon signal of C-9 is surprisingly broad. The observed  $^{15}\text{N NMR}$  shift (-108.0 ppm) is lower compared to the value of the free oxide (-87.5 ppm, DMSO), but higher compared to the pyr-NO\* $\text{TFA}$  (-135.7 ppm).<sup>5</sup> As also the MS department could not find the mass of the cationic species, the binding of the N-oxide might be weak and might also explain the observations from the NMR data.

**HRMS:** MS department could not find the mass of the cationic species (**13**), but rather compound **12**.

**SC-XRD:** Crystal of sufficient quality for SC-XRD was obtained *via* liquid-liquid diffusion of pentane into a concentrated solution of complex **13** in  $\text{CH}_2\text{Cl}_2$  at  $-18$  °C

## 6. DOSY Experiments

After we observed that the addition of 1.0 equiv. of NaBAR<sup>F</sup> to complex **7** resulted in the formation of a formally monomeric chlorobismuthonium salt **11** in solution and a dimeric bismuthonium salt **11a** in solid-state, we repeated the reaction with 0.5 equiv. of NaBAR<sup>F</sup> (Scheme S2). This reaction led to the formation of a dimeric chlorobismuthonium salt **11a** in solution and solid state. However, the <sup>1</sup>H NMR spectrum of this reaction displays broader signals in comparison to the addition of 1.0 equiv. of NaBAR<sup>F</sup> (Figure S2.), indicating a fast dynamic exchange between different species in solution.

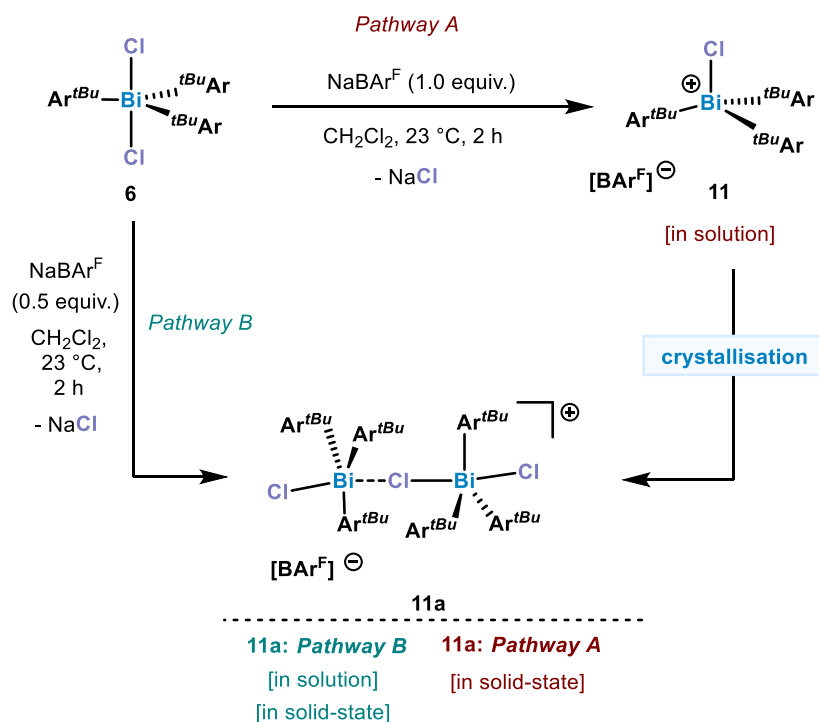

**Scheme S2.** Synthesis and crystallization of chlorotriaryl bismuthonium salts **11** and **11a**.

In contrast to the reaction of **6** with 0.5 equiv. of NaBAR<sup>F</sup> where compound **6** crystallized, the installation of <sup>t</sup>Bu-substituents in *meta*-position might facilitate the formation of the dimeric structure *via* London dispersion forces.<sup>6-8</sup> In order to understand the dynamic behaviour of this chlorobismuthonium species **11** and **11a**, we carried out this reaction with different amounts of NaBAR<sup>F</sup> (1.0, 0.85, 0.5 and 0.25 equiv.). As depicted in Figure 2, a trend can be clearly observed: as the amounts of NaBAR<sup>F</sup> decrease, the signals of the observed bismuth species are more similar to **6**, however, separate Bi species were not observed at any time in the <sup>1</sup>H NMR spectra.

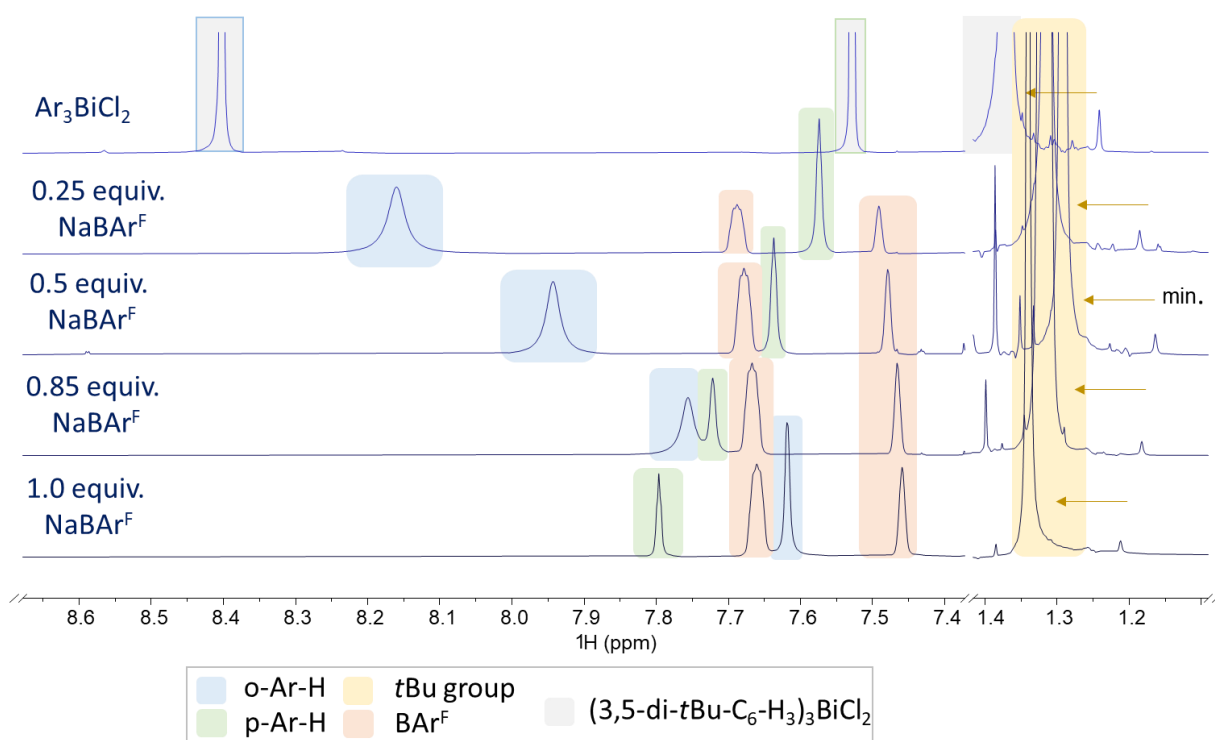

**Figure S2.** Stacked <sup>1</sup>H NMR spectra of the reaction of complex **7** with various amount of  $\text{NaBAR}^{\text{F}}$  (1.0, 0.85, 0.5, 0.25 equiv.) in  $\text{CH}_2\text{Cl}_2$  at 25 °C for 2 h. The precipitate was filtered off and the <sup>1</sup>H NMR spectra were recorded (500 MHz,  $\text{CDCl}_3$ ).

Furthermore, the addition of 1.0 equiv. of  $\text{NaBAR}^{\text{F}}$  leads to sharper signals, whereas a reduced amount of the halide scavenger results in broader signals. Whereas all the aromatic H signals experience a shift with an increased amount of  $\text{NaBAR}^{\text{F}}$ , the chemical shift of the <sup>t</sup>Bu groups reaches a minimum at 0.5 equiv.. This indicates that a fast and reversible equilibrium between at least three different species is present in solution after the abstraction of a chloride from the Bi. These results again, are in stark contrast to the behaviour of the analogous fluorobismuthonium salt.<sup>1</sup>

To gain deeper insights into the distinct behavior of chlorobismuthonium salts in both solution and solid-state, we conducted DOSY (Diffusion Ordered Spectroscopy) experiments. For this, different amount of equivalents of  $\text{NaBAR}^{\text{F}}$  (1.0, 0.85, 0.5, 0.25 equiv.) were added to **7**, and the reaction was left to stir for 2 h at room temperature. After this time, the precipitate was removed through filtration, and subsequent evaporation under Schlenk vacuum conditions yielded the corresponding chlorobismuthonium salts, for which <sup>1</sup>H NMR spectra were recorded (see Figure S2). Based on these, the self-diffusion coefficients  $D_{\text{self}}$  were determined (Figure S3).

Figure S3 illustrates the self-diffusion coefficients. Increased quantities of NaBAr<sup>F</sup> result in decreased  $D_{\text{self}}$  values, suggesting the formation of molecules with higher molecular masses, potentially as dimeric species. However, it cannot be ruled out that the presence of BAr<sup>F</sup> as anion might distort the values in the solution.

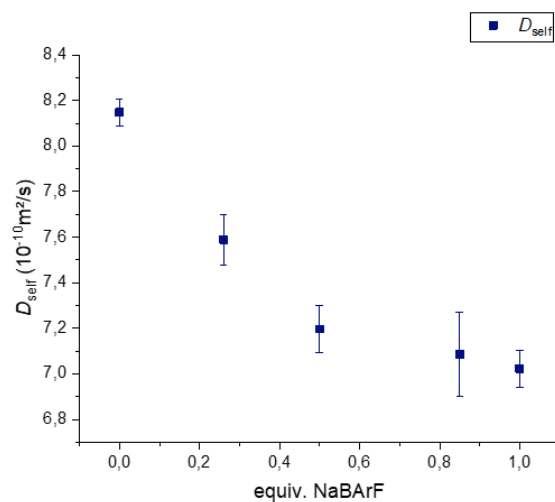

**Figure S3.**  $D_{\text{self}}$  values of chlorobismuthonium salts after the addition of different equivalents of NaBAr<sup>F</sup>.

## 7. Determination of Lewis acidity

The Lewis acidity of the chlorotriarylbi-muthonium salts was determined by the Gutmann-Beckett-method. This method is based on the use of triethylphosphine oxide ( $\text{Et}_3\text{P}=\text{O}$ ) as Lewis base which interacts with the Lewis acid, resulting in a chemical shift ( $\delta$ ) of the phosphine oxide in the  $^{31}\text{P}$  NMR spectrum.

The strength of the Lewis acidity is determined by the acceptor number (AN), which is calculated as followed:

$$\text{AN}(\text{Et}_3\text{PO}) = 2.21 \cdot (\delta_{\text{P(LA)}} - 41.0)$$

**Table S1.** Determination of the Lewis acidity by the acceptor number in  $\text{CD}_2\text{Cl}_2$ . Equimolar amounts of the corresponding Lewis acid and Lewis base ( $\text{Et}_3\text{PO}$ ) were dissolved in  $\text{CD}_2\text{Cl}_2$ . The  $^{31}\text{P}$  NMR spectra were recorded at 121.5 MHz at 298 K. Stacked  $^{31}\text{P}$  NMR spectra of the corresponding  $\text{Ar}_3\text{BiCl} \cdot \text{OPEt}_3$  adduct are shown in Figure S8 and S9.

| Entry                          | Compound                                                                                                   | $\delta^{31}\text{P}$ (ppm) | AN    |
|--------------------------------|------------------------------------------------------------------------------------------------------------|-----------------------------|-------|
| 1                              | $\text{Et}_3\text{PO}$                                                                                     | 50.45                       |       |
| Formally monomeric Bi species: |                                                                                                            |                             |       |
| 2                              | $[\text{Ph}_3\text{BiCl}][\text{BAr}^{\text{F}}]$ ( <b>9</b> )                                             | 69.86                       | 63.78 |
| 3                              | $[\text{3,5-Me}_2\text{-C}_6\text{H}_3\text{-BiCl}][\text{BAr}^{\text{F}}]$ ( <b>10</b> )                  | 68.29                       | 60.31 |
| 4                              | $[\text{3,5-}i\text{Bu}_2\text{-C}_6\text{H}_3\text{-BiCl}][\text{BAr}^{\text{F}}]$ ( <b>11</b> )          | 67.67                       | 58.94 |
| 5                              | $[\text{Mes}_3\text{BiCl}][\text{BAr}^{\text{F}}]$ ( <b>12</b> )                                           | 60.85                       | 43.86 |
| Formally dimeric Bi species:   |                                                                                                            |                             |       |
| 6                              | $[(\text{Ph}_3\text{BiCl})_2][\text{BAr}^{\text{F}}]$ ( <b>9a</b> )                                        | 69.88                       | 63.82 |
| 7                              | $[((\text{3,5-Me}_2\text{-C}_6\text{H}_3)_3\text{-BiCl})_2][\text{BAr}^{\text{F}}]$ ( <b>10a</b> )         | 68.30                       | 60.33 |
| 8                              | $[((\text{3,5-}i\text{Bu}_2\text{-C}_6\text{H}_3)_3\text{-BiCl})_2][\text{BAr}^{\text{F}}]$ ( <b>11a</b> ) | 67.67                       | 58.94 |

Table S1 displays the  $^{31}\text{P}$  NMR chemical shifts and acceptor numbers of the chlorotriarylbi-muthonium salts (9-12 and 9a-11a). A closer look into the chemical shifts and acceptor numbers of the formally monomeric Bi species indicates a ligand effect on the Lewis acidity. The more steric the aryl-ligand, the lower the AN, resulting in a lower Lewis acidity. The  $^{31}\text{P}$  NMR of complex **9** displays three signals at  $\delta_{\text{P}}=78.65$ ,  $\delta_{\text{P}}=69.86$  and  $\delta_{\text{P}}=55.64$  ppm in  $\text{CD}_2\text{Cl}_2$ .

The experimental observation on the formally dimeric Bi species show the same trend as the formally monomeric. Furthermore, the dimeric species show identical  $^{31}\text{P}$  NMR shifts as the corresponding monomeric structures, indicating the formation of a monomeric  $\text{Ar}_3\text{BiCl} \cdot \text{OPEt}_3$  adduct and  $\text{Ar}_3\text{BiCl}_2$ , which is further confirmed by the  $^1\text{H}$  NMR spectra, emphasizing a dynamic equilibrium in solution (Figure S4).



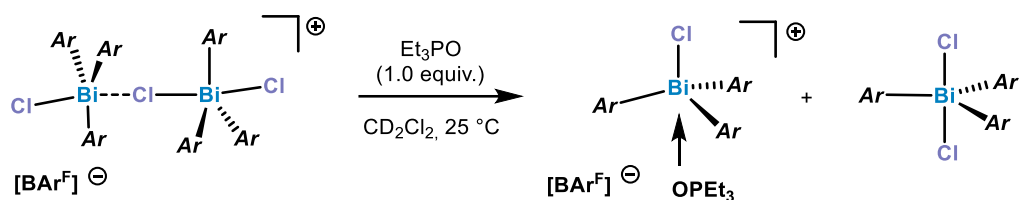

**Figure S4.** Formation of  $\text{Ar}_3\text{BiCl}\cdot\text{OPEt}_3$  adduct and  $\text{Ar}_3\text{BiCl}_2$  after the addition of  $\text{Et}_3\text{PO}$  to dimeric chlorobismuthonium salts (**9a-11a**).

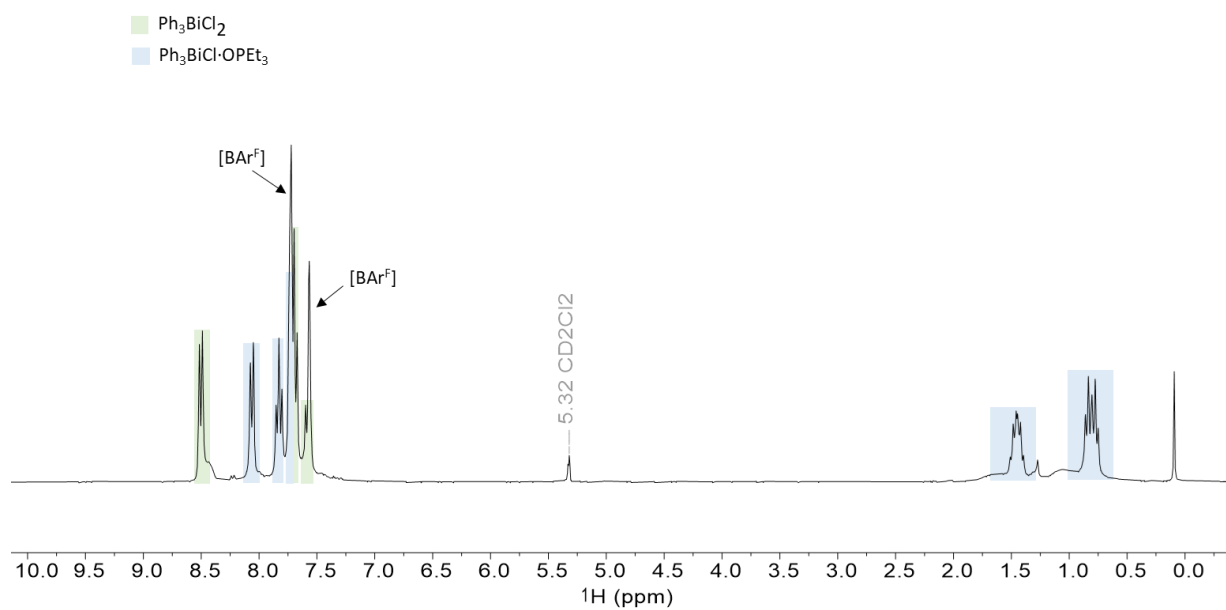

**Figure S5.**  $^1\text{H}$  NMR spectra of the mixture of Lewis acid **9a** with  $\text{Et}_3\text{PO}$  (121.5 MHz, 298K,  $\text{CD}_2\text{Cl}_2$ ).

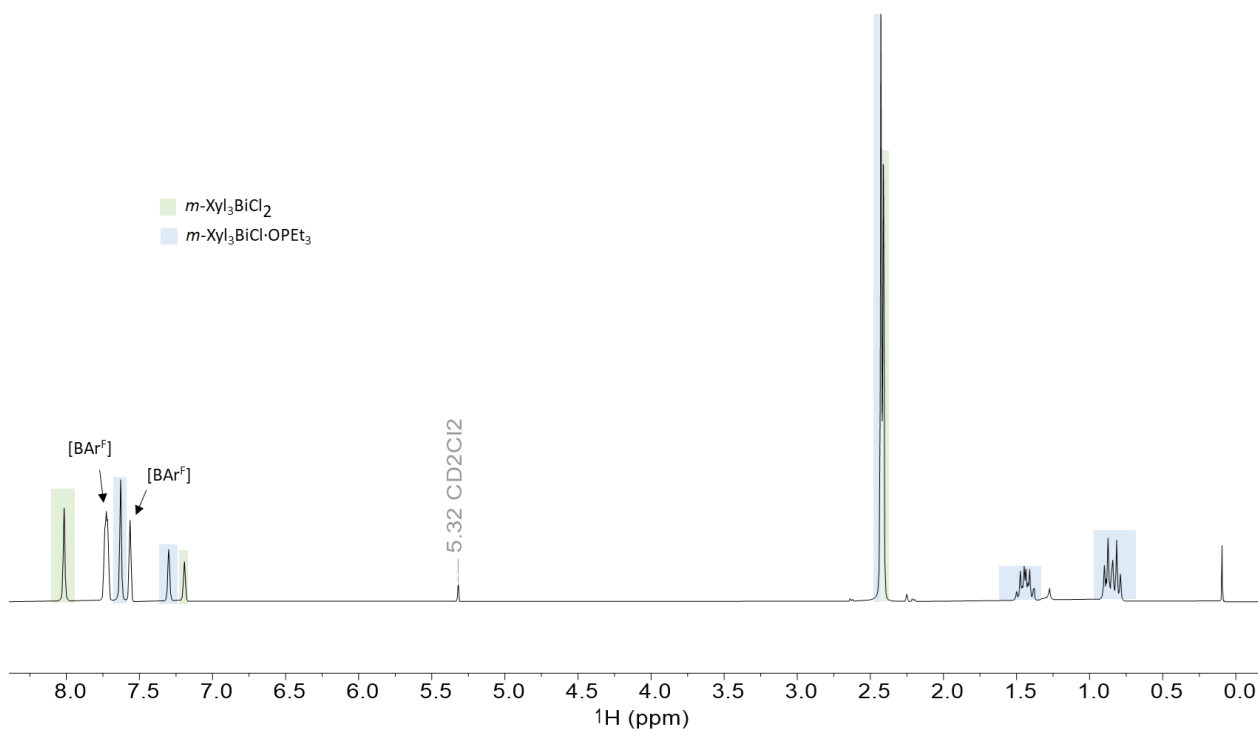

**Figure S6.**  $^1\text{H}$  NMR spectra of the mixture of Lewis acid **10a** with  $\text{Et}_3\text{PO}$  (121.5 MHz, 298K,  $\text{CD}_2\text{Cl}_2$ ).

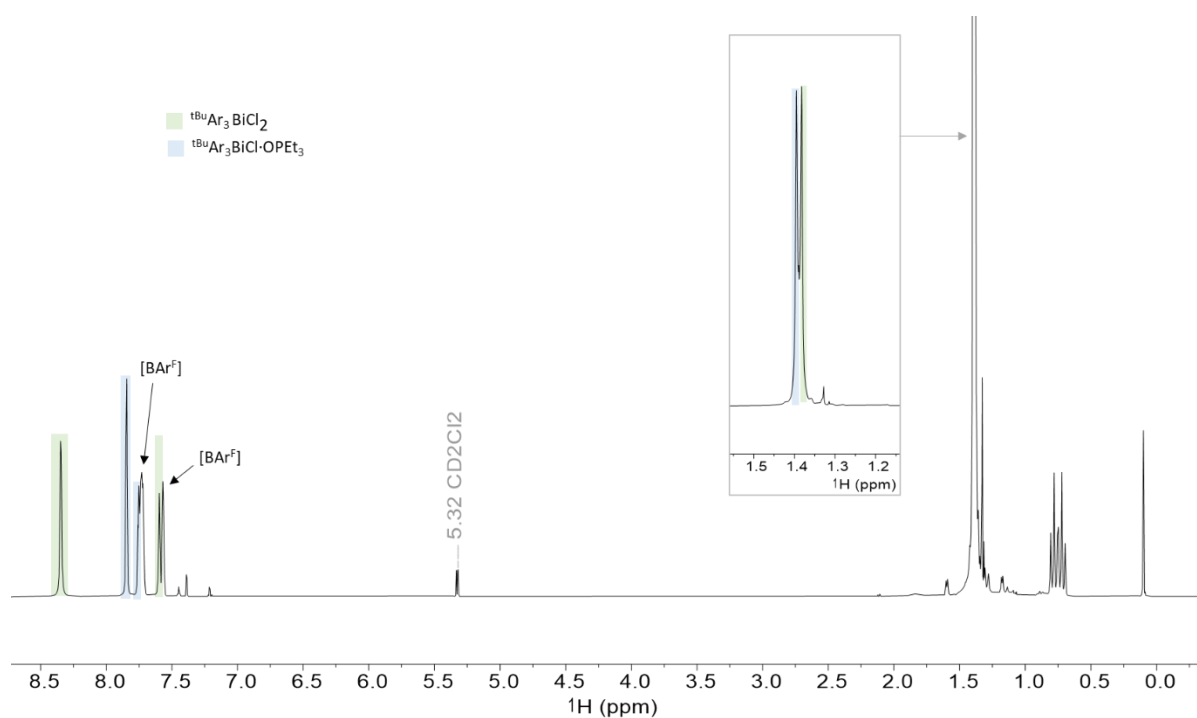

**Figure S7.**  $^1\text{H}$  NMR spectra of the mixture of Lewis acid **11a** with  $\text{Et}_3\text{PO}$  (121.5 MHz, 298K,  $\text{CD}_2\text{Cl}_2$ ).

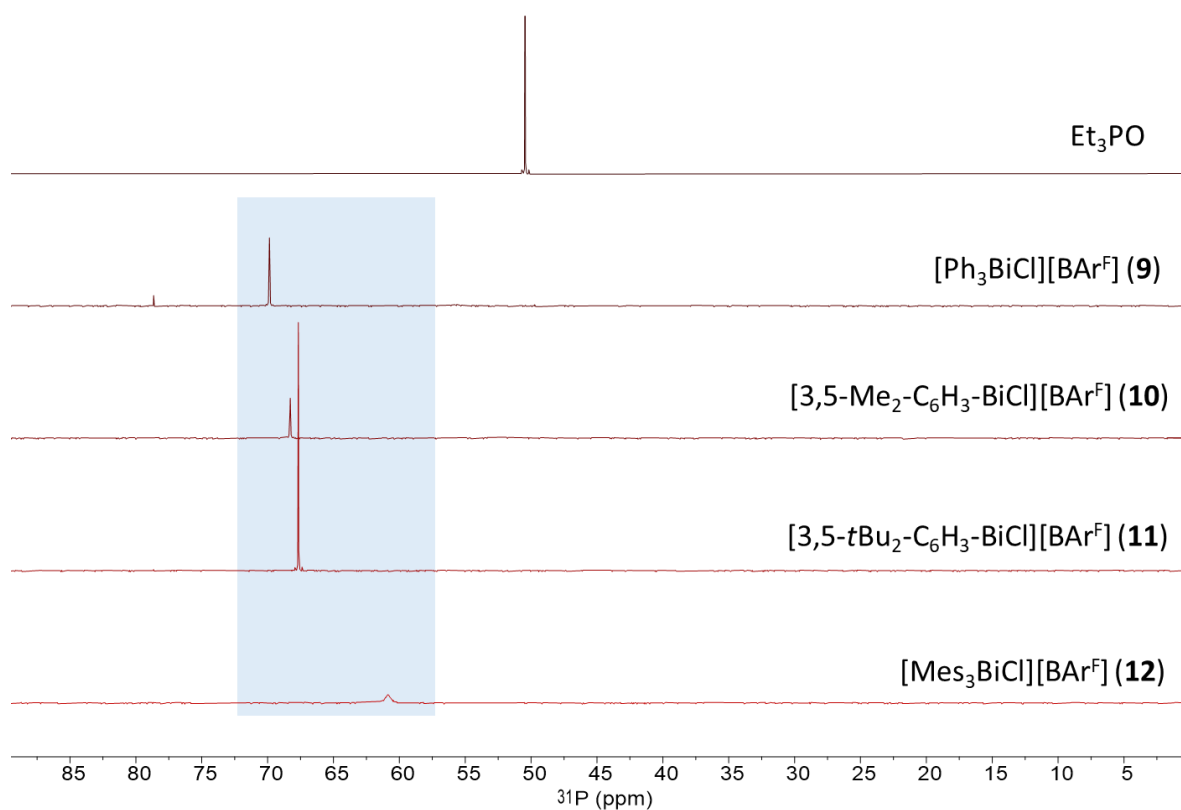

**Figure S8.** Stacked  $^{31}\text{P}$  NMR spectra of the mixture of Lewis acid **9-12** with  $\text{Et}_3\text{PO}$  (121.5 MHz, 298K,  $\text{CD}_2\text{Cl}_2$ ).

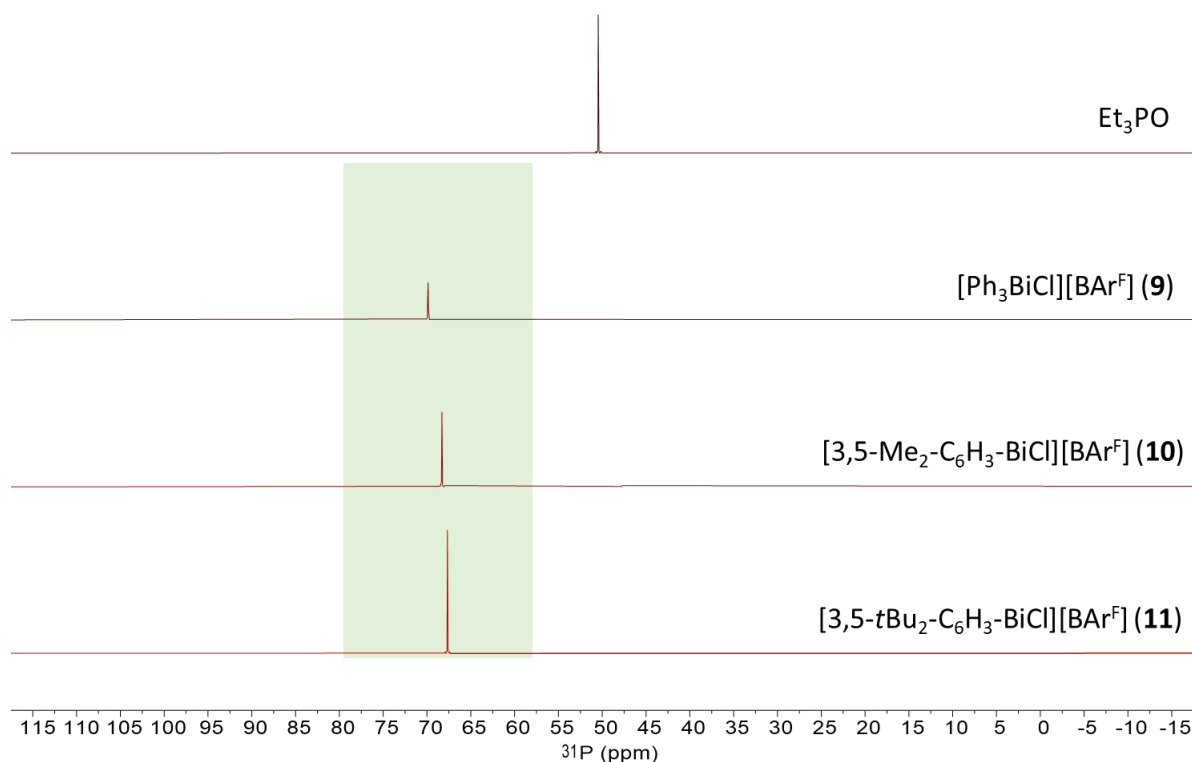

**Figure S9.** Stacked  $^{31}\text{P}$  NMR spectra of the mixture of Lewis acid **9a-11a** with  $\text{Et}_3\text{PO}$  (121.5 MHz, 298K,  $\text{CD}_2\text{Cl}_2$ ).

## 8. Polymerization of THF- $d_8$

**General procedure:** A flame-dried *J*-Young tube was charged with the corresponding chlorotriarylbismuthonium salt (0.01 mmol) and dissolved in 0.5 mL anhydrous THF- $d_8$ .  $^1\text{H}$  NMR spectra of the reactions were measured by NMR spectroscopy upon mixing and after 12 h (see figure S10 – S13).

a) Reaction of **9** with THF:

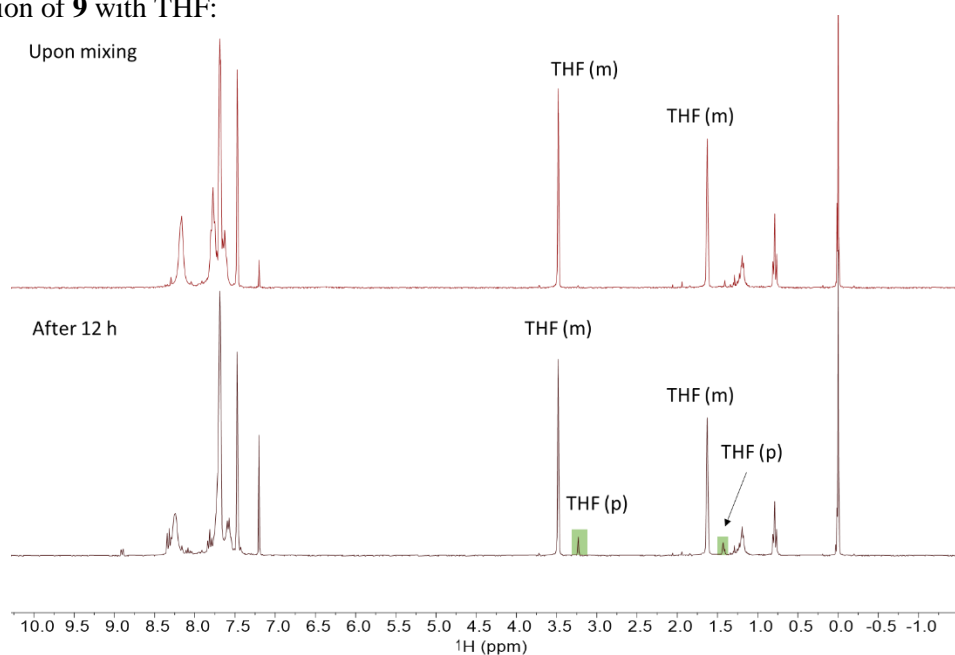

**Figure S10.** Stacked  $^1\text{H}$  NMR spectra of the reaction mixture of **9** with THF- $d_8$  upon mixing and after 12 h (300 MHz, 298K). THF (m) = monomer, THF (p) = polymer.

**b) Reaction of **10** with THF-*d*<sub>8</sub>**

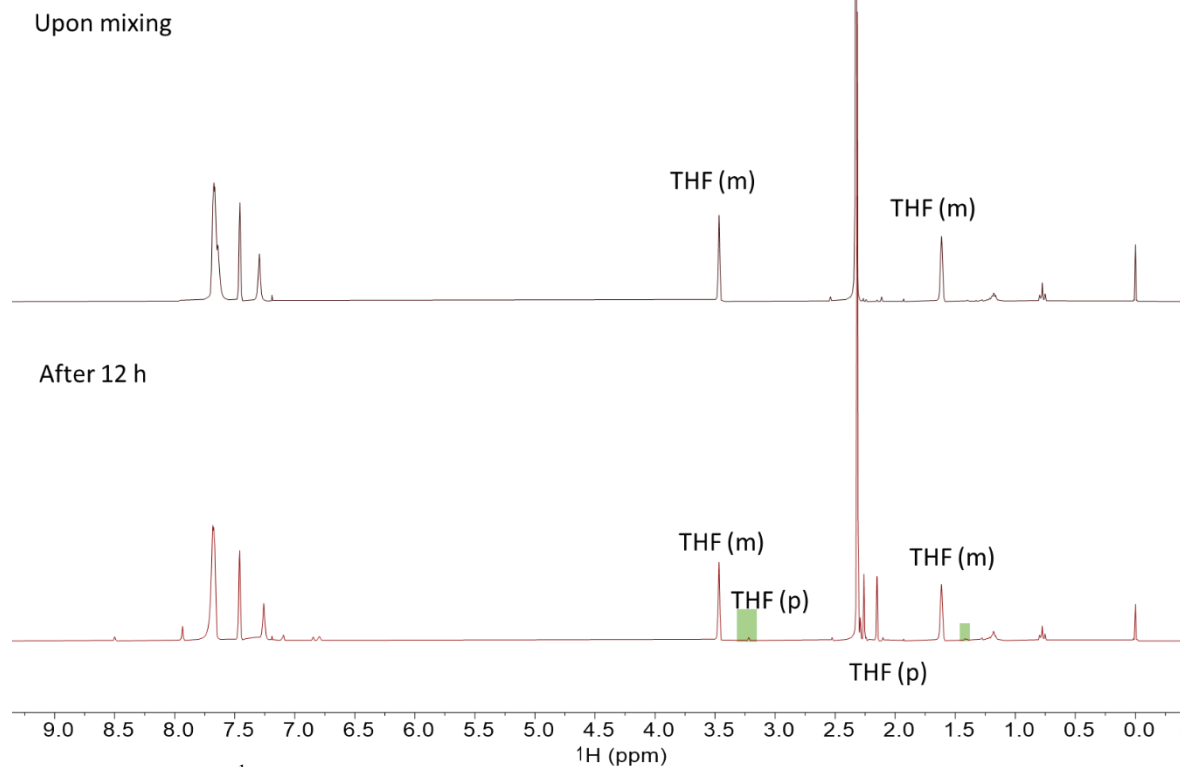

**Figure S11.** Stacked <sup>1</sup>H NMR spectra of the reaction mixture of **10** with THF-*d*<sub>8</sub> upon mixing and after 12 h (300 MHz, 298K). THF (m) = monomer, THF (p) = polymer.

**c) Reaction of **12** with THF-*d*<sub>8</sub>**

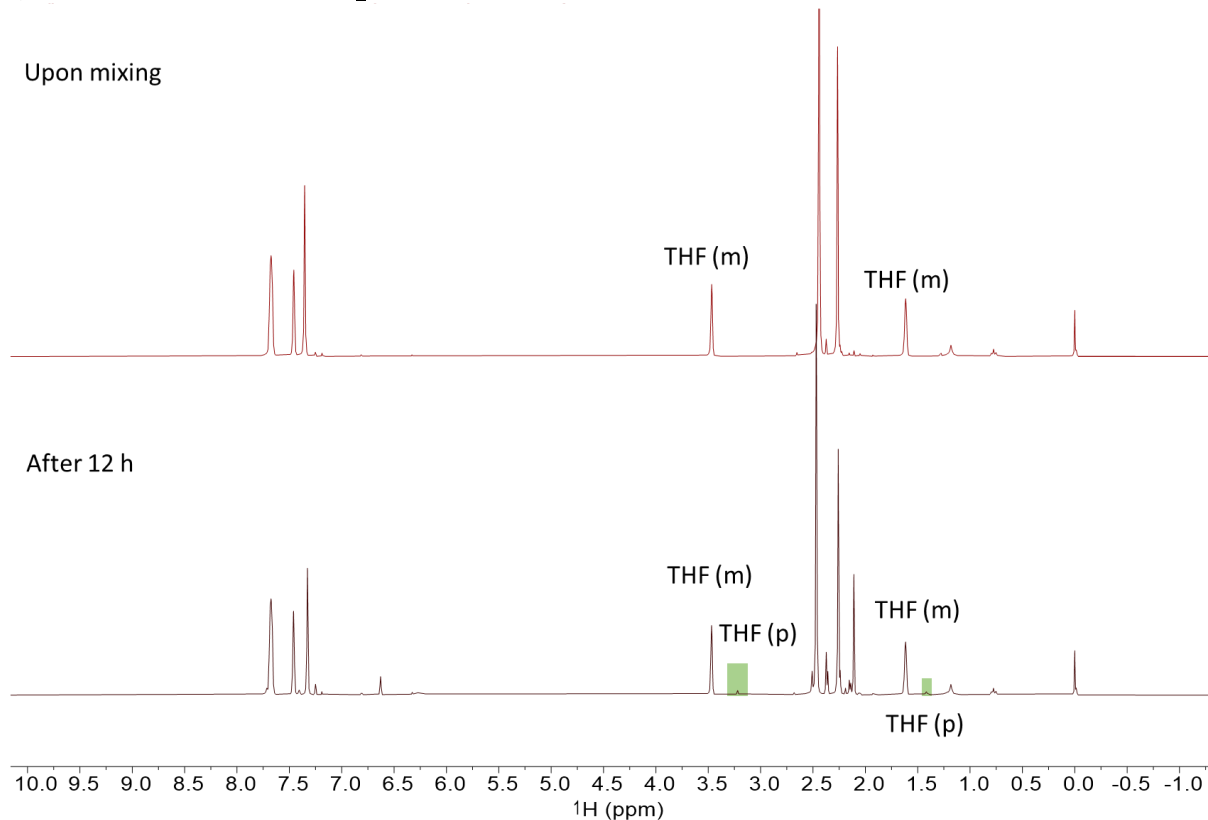

**Figure S12.** Stacked <sup>1</sup>H NMR spectra of the reaction mixture of **12** with THF-*d*<sub>8</sub> upon mixing and after 12 h (300 MHz, 298K). THF (m) = monomer, THF (p) = polymer.

d) Reaction of **9a** with THF- $d_8$

Upon mixing

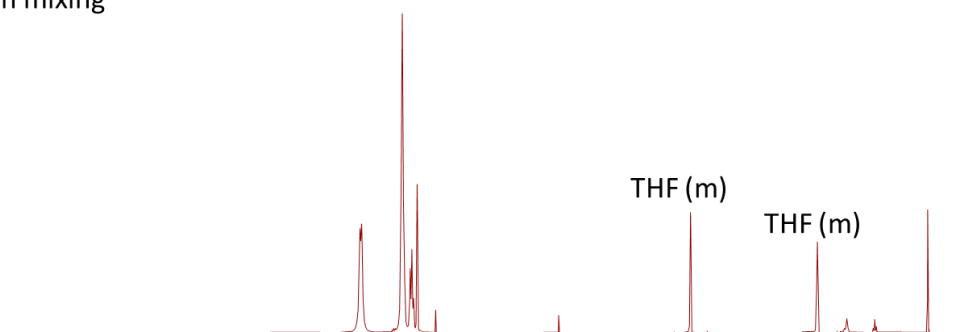

After 12 h

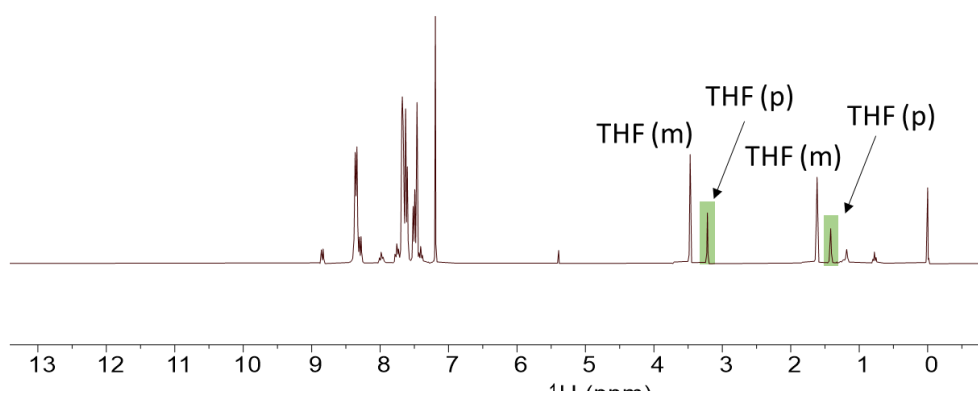

**Figure S13.** Stacked  $^1\text{H}$  NMR spectra of the reaction mixture of **9a** with THF- $d_8$  upon mixing and after 12 h (300 MHz, 298K). THF (m) = monomer, THF (p) = polymer.

The reaction of chlorobismuthonium salts **11**, **10a**, **11a** with THF- $d_8$  did not show any reactivity towards polymerized THF- $d_8$ .

## 9. X-ray Data

### 9. 1 Single crystal structure analysis of tris(3,5-dimethylphenyl)bimuth dichloride (6)

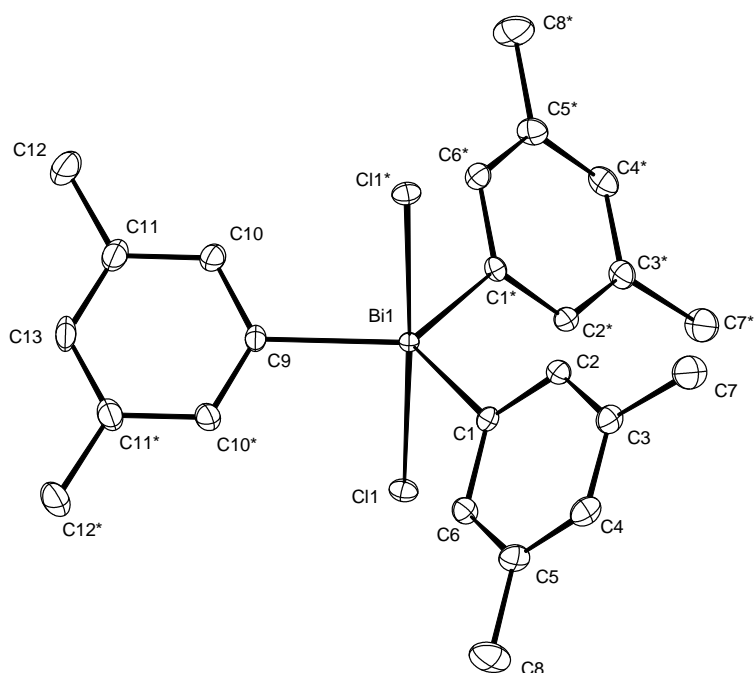

**Figure S14:** The solid state structure of **6**. H atoms have been removed for clarity.

#### X-ray Crystal Structure Analysis:

$C_{24} H_{27} Bi Cl_2$ ,  $M_r = 595.33 \text{ g mol}^{-1}$ , colourless prism, crystal size  $0.091 \times 0.072 \times 0.043 \text{ mm}^3$ , orthorhombic, space group  $Pbcn$  [60],  $a = 15.9412(6) \text{ \AA}$ ,  $b = 10.4632(4) \text{ \AA}$ ,  $c = 13.6006(5) \text{ \AA}$ ,  $V = 2268.53(15) \text{ \AA}^3$ ,  $T = 100(2) \text{ K}$ ,  $Z = 4$ ,  $D_{calc} = 1.743 \text{ g}\cdot\text{cm}^{-3}$ ,  $\lambda = 0.71073 \text{ \AA}$ ,  $\mu(Mo-K\alpha) = 8.014 \text{ mm}^{-1}$ , Gaussian correction ( $T_{min} = 0.60986$ ,  $T_{max} = 0.81139$ ), Bruker-AXS Kappa Mach3 with APEX-II detector and  $I\mu S$  micro focus Mo-anode X-ray source,  $2.328 < \theta < 34.958^\circ$ , 85206 measured reflections, 4976 independent reflections, 3558 reflections with  $I > 2\sigma(I)$ ,  $R_{int} = 0.0451$ . The structure was solved by *SHELXT* and refined by full-matrix least-squares (*SHELXL*) against  $F^2$  to  $R_I = 0.0163$  [ $I > 2\sigma(I)$ ],  $wR_2 = 0.0330$  [all data] with 127 parameters and 0 restraints.

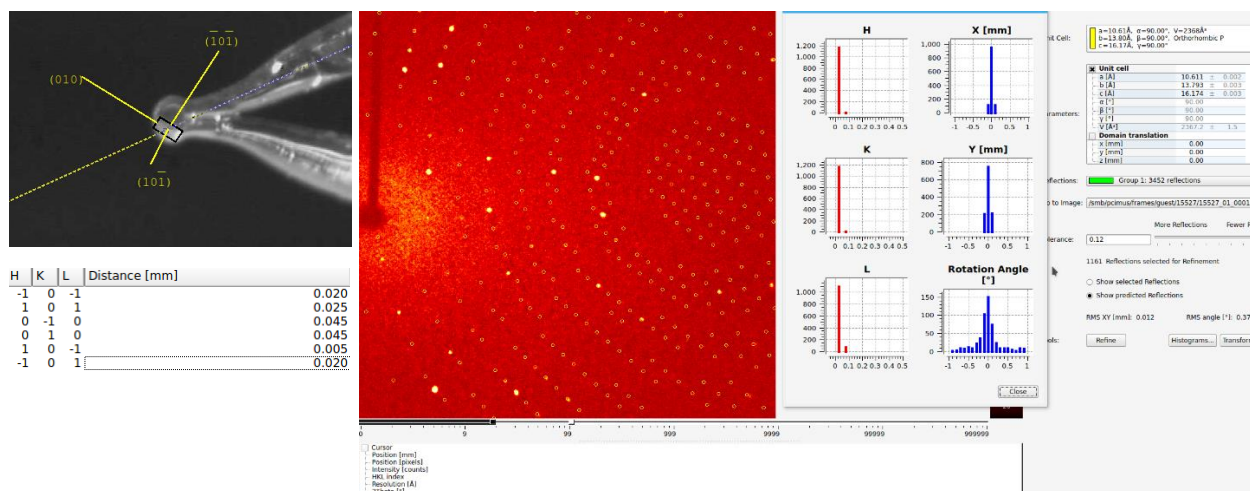

**Figure S15:** Crystal faces and unit cell determination/refinement of **6**.

#### INTENSITY STATISTICS FOR DATASET

| Resolution  | #Data | #Theory | %Complete | Redundancy | Mean I | Mean I/s | Rmerge | Rsigma |
|-------------|-------|---------|-----------|------------|--------|----------|--------|--------|
| Inf - 2.80  | 83    | 83      | 100.0     | 24.83      | 129.09 | 92.99    | 0.0211 | 0.0061 |
| 2.80 - 1.78 | 196   | 196     | 100.0     | 30.30      | 118.30 | 93.41    | 0.0213 | 0.0060 |
| 1.78 - 1.39 | 276   | 276     | 100.0     | 31.94      | 77.23  | 82.47    | 0.0261 | 0.0067 |
| 1.39 - 1.20 | 286   | 286     | 100.0     | 32.09      | 64.70  | 71.46    | 0.0310 | 0.0075 |
| 1.20 - 1.09 | 263   | 263     | 100.0     | 30.01      | 55.01  | 63.75    | 0.0370 | 0.0091 |
| 1.09 - 1.00 | 302   | 302     | 100.0     | 22.29      | 49.45  | 49.42    | 0.0398 | 0.0115 |
| 1.00 - 0.94 | 270   | 270     | 100.0     | 17.95      | 40.91  | 38.05    | 0.0475 | 0.0152 |
| 0.94 - 0.89 | 286   | 286     | 100.0     | 15.60      | 32.96  | 31.24    | 0.0548 | 0.0187 |
| 0.89 - 0.85 | 271   | 271     | 100.0     | 14.51      | 32.21  | 28.27    | 0.0584 | 0.0209 |
| 0.85 - 0.81 | 322   | 322     | 100.0     | 13.83      | 31.35  | 26.38    | 0.0601 | 0.0223 |
| 0.81 - 0.79 | 201   | 201     | 100.0     | 13.05      | 22.24  | 19.60    | 0.0820 | 0.0306 |
| 0.79 - 0.76 | 319   | 319     | 100.0     | 12.96      | 26.17  | 21.77    | 0.0745 | 0.0279 |
| 0.76 - 0.74 | 252   | 252     | 100.0     | 12.15      | 23.34  | 19.14    | 0.0836 | 0.0330 |
| 0.74 - 0.72 | 263   | 263     | 100.0     | 12.04      | 20.90  | 17.39    | 0.0942 | 0.0367 |
| 0.72 - 0.70 | 308   | 308     | 100.0     | 11.54      | 22.11  | 17.43    | 0.0914 | 0.0368 |
| 0.70 - 0.68 | 344   | 344     | 100.0     | 11.19      | 17.43  | 13.97    | 0.1177 | 0.0470 |
| 0.68 - 0.67 | 183   | 183     | 100.0     | 10.73      | 18.19  | 14.46    | 0.1126 | 0.0470 |
| 0.67 - 0.65 | 404   | 404     | 100.0     | 10.39      | 16.13  | 12.38    | 0.1280 | 0.0545 |
| 0.65 - 0.64 | 219   | 219     | 100.0     | 10.25      | 14.40  | 11.14    | 0.1391 | 0.0605 |
| 0.64 - 0.63 | 239   | 239     | 100.0     | 9.73       | 14.31  | 10.82    | 0.1513 | 0.0644 |
| 0.63 - 0.62 | 232   | 242     | 95.9      | 6.95       | 14.53  | 8.75     | 0.1550 | 0.0912 |
| 0.72 - 0.62 | 1929  | 1939    | 99.5      | 10.22      | 16.90  | 12.90    | 0.1210 | 0.0541 |
| Inf - 0.62  | 5519  | 5529    | 99.8      | 16.48      | 36.10  | 32.88    | 0.0437 | 0.0204 |

Complete .cif-data of the compound are available under the CCDC number **CCDC-2356069**.

**Table S2:** Crystal data and structure refinement of **6**.

|                                   |                                                    |                                  |
|-----------------------------------|----------------------------------------------------|----------------------------------|
| Identification code               | 15527                                              |                                  |
| Empirical formula                 | C <sub>24</sub> H <sub>27</sub> Bi Cl <sub>2</sub> |                                  |
| Color                             | colourless                                         |                                  |
| Formula weight                    | 595.33 g·mol <sup>-1</sup>                         |                                  |
| Temperature                       | 100(2) K                                           |                                  |
| Wavelength                        | 0.71073 Å                                          |                                  |
| Crystal system                    | Orthorhombic                                       |                                  |
| Space group                       | <i>Pbcn</i> , (no. 60)                             |                                  |
| Unit cell dimensions              | a = 15.9412(6) Å                                   | α = 90°.                         |
|                                   | b = 10.4632(4) Å                                   | β = 90°.                         |
|                                   | c = 13.6006(5) Å                                   | γ = 90°.                         |
| Volume                            | 2268.53(15) Å <sup>3</sup>                         |                                  |
| Z                                 | 4                                                  |                                  |
| Density (calculated)              | 1.743 Mg·m <sup>-3</sup>                           |                                  |
| Absorption coefficient            | 8.014 mm <sup>-1</sup>                             |                                  |
| F(000)                            | 1152 e                                             |                                  |
| Crystal size                      | 0.091 x 0.072 x 0.043 mm <sup>3</sup>              |                                  |
| θ range for data collection       | 2.328 to 34.958°.                                  |                                  |
| Index ranges                      | -25 ≤ h ≤ 25, -16 ≤ k ≤ 16, -21 ≤ l ≤ 21           |                                  |
| Reflections collected             | 85206                                              |                                  |
| Independent reflections           | 4976 [ <i>R</i> <sub>int</sub> = 0.0451]           |                                  |
| Reflections with I > 2σ(I)        | 3558                                               |                                  |
| Completeness to θ = 25.242°       | 100.0 %                                            |                                  |
| Absorption correction             | Gaussian                                           |                                  |
| Max. and min. transmission        | 0.83538 and 0.52512                                |                                  |
| Refinement method                 | Full-matrix least-squares on F <sup>2</sup>        |                                  |
| Data / restraints / parameters    | 4976 / 0 / 127                                     |                                  |
| Goodness-of-fit on F <sup>2</sup> | 1.013                                              |                                  |
| Final R indices [I > 2σ(I)]       | <i>R</i> <sub>1</sub> = 0.0163                     | w <i>R</i> <sup>2</sup> = 0.0291 |
| R indices (all data)              | <i>R</i> <sub>1</sub> = 0.0338                     | w <i>R</i> <sup>2</sup> = 0.0330 |
| Extinction coefficient            | n/a                                                |                                  |
| Largest diff. peak and hole       | 0.830 and -0.748 e·Å <sup>-3</sup>                 |                                  |



**Table S3:** Bond lengths [Å] and angles [°] of **6**.

|                      |             |                    |            |
|----------------------|-------------|--------------------|------------|
| Bi(1)-Cl(1)          | 2.5898(4)   | Bi(1)-Cl(1)#1      | 2.5898(4)  |
| Bi(1)-C(1)           | 2.1980(15)  | Bi(1)-C(1)#1       | 2.1980(15) |
| Bi(1)-C(9)           | 2.202(2)    | C(1)-C(2)          | 1.387(2)   |
| C(1)-C(6)            | 1.382(2)    | C(2)-H(2)          | 0.9500     |
| C(2)-C(3)            | 1.390(2)    | C(3)-C(4)          | 1.395(3)   |
| C(3)-C(7)            | 1.504(2)    | C(4)-H(4)          | 0.9500     |
| C(4)-C(5)            | 1.389(2)    | C(5)-C(6)          | 1.399(2)   |
| C(5)-C(8)            | 1.503(3)    | C(6)-H(6)          | 0.9500     |
| C(7)-H(7A)           | 0.9800      | C(7)-H(7B)         | 0.9800     |
| C(7)-H(7C)           | 0.9800      | C(8)-H(8A)         | 0.9800     |
| C(8)-H(8B)           | 0.9800      | C(8)-H(8C)         | 0.9800     |
| C(9)-C(10)#1         | 1.379(2)    | C(9)-C(10)         | 1.379(2)   |
| C(10)-H(10)          | 0.9500      | C(10)-C(11)        | 1.402(3)   |
| C(11)-C(12)          | 1.505(3)    | C(11)-C(13)        | 1.394(2)   |
| C(12)-H(12A)         | 0.9800      | C(12)-H(12B)       | 0.9800     |
| C(12)-H(12C)         | 0.9800      | C(13)-H(13)        | 0.9500     |
| Cl(1)#1-Bi(1)-Cl(1)  | 177.391(18) | C(1)-Bi(1)-Cl(1)   | 89.86(4)   |
| C(1)#1-Bi(1)-Cl(1)#1 | 89.86(4)    | C(1)-Bi(1)-Cl(1)#1 | 91.55(4)   |
| C(1)#1-Bi(1)-Cl(1)   | 91.55(4)    | C(1)#1-Bi(1)-C(1)  | 114.70(8)  |
| C(1)-Bi(1)-C(9)      | 122.65(4)   | C(1)#1-Bi(1)-C(9)  | 122.65(4)  |
| C(9)-Bi(1)-Cl(1)     | 88.696(9)   | C(9)-Bi(1)-Cl(1)#1 | 88.695(9)  |
| C(2)-C(1)-Bi(1)      | 117.68(11)  | C(6)-C(1)-Bi(1)    | 119.55(11) |
| C(6)-C(1)-C(2)       | 122.76(15)  | C(1)-C(2)-H(2)     | 120.6      |
| C(1)-C(2)-C(3)       | 118.84(15)  | C(3)-C(2)-H(2)     | 120.6      |
| C(2)-C(3)-C(4)       | 118.61(15)  | C(2)-C(3)-C(7)     | 120.60(16) |
| C(4)-C(3)-C(7)       | 120.78(16)  | C(3)-C(4)-H(4)     | 118.8      |
| C(5)-C(4)-C(3)       | 122.46(16)  | C(5)-C(4)-H(4)     | 118.8      |
| C(4)-C(5)-C(6)       | 118.56(16)  | C(4)-C(5)-C(8)     | 121.54(16) |
| C(6)-C(5)-C(8)       | 119.89(16)  | C(1)-C(6)-C(5)     | 118.74(15) |
| C(1)-C(6)-H(6)       | 120.6       | C(5)-C(6)-H(6)     | 120.6      |
| C(3)-C(7)-H(7A)      | 109.5       | C(3)-C(7)-H(7B)    | 109.5      |
| C(3)-C(7)-H(7C)      | 109.5       | H(7A)-C(7)-H(7B)   | 109.5      |
| H(7A)-C(7)-H(7C)     | 109.5       | H(7B)-C(7)-H(7C)   | 109.5      |
| C(5)-C(8)-H(8A)      | 109.5       | C(5)-C(8)-H(8B)    | 109.5      |
| C(5)-C(8)-H(8C)      | 109.5       | H(8A)-C(8)-H(8B)   | 109.5      |

|                     |            |                     |            |
|---------------------|------------|---------------------|------------|
| H(8A)-C(8)-H(8C)    | 109.5      | H(8B)-C(8)-H(8C)    | 109.5      |
| C(10)#1-C(9)-Bi(1)  | 118.11(10) | C(10)-C(9)-Bi(1)    | 118.11(10) |
| C(10)#1-C(9)-C(10)  | 123.8(2)   | C(9)-C(10)-H(10)    | 120.8      |
| C(9)-C(10)-C(11)    | 118.34(17) | C(11)-C(10)-H(10)   | 120.8      |
| C(10)-C(11)-C(12)   | 119.88(18) | C(13)-C(11)-C(10)   | 118.52(18) |
| C(13)-C(11)-C(12)   | 121.60(17) | C(11)-C(12)-H(12A)  | 109.5      |
| C(11)-C(12)-H(12B)  | 109.5      | C(11)-C(12)-H(12C)  | 109.5      |
| H(12A)-C(12)-H(12B) | 109.5      | H(12A)-C(12)-H(12C) | 109.5      |
| H(12B)-C(12)-H(12C) | 109.5      | C(11)#1-C(13)-C(11) | 122.5(2)   |
| C(11)#1-C(13)-H(13) | 118.8      | C(11)-C(13)-H(13)   | 118.8      |

---

Symmetry transformations used to generate equivalent atoms:

#1 -x+1,y,-z+3/2

## 9.2 Single crystal structure analysis of chloro-tris(3,5-dimethylphenyl)bismuthonium tetrakis(3,5-bis(trifluoromethyl)phenyl)borate (10)

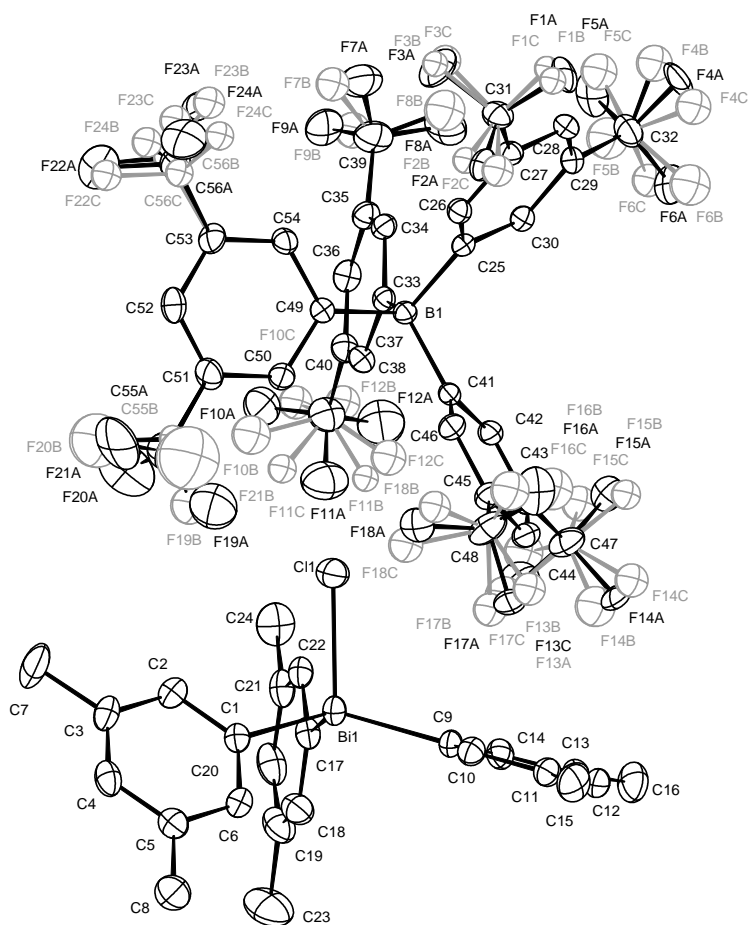

**Figure S16:** The solid state structure of **10**. H atoms have been removed for clarity and disordered parts shown in grey.

### X-ray Crystal Structure Analysis:

$C_{56}H_{39}B Bi Cl F_{24}$ ,  $M_r = 1423.11 \text{ g mol}^{-1}$ , colourless needle, crystal size  $0.422 \times 0.15 \times 0.083 \text{ mm}^3$ , monoclinic, space group  $P2_1/c$  [14],  $a = 18.1228(8) \text{ \AA}$ ,  $b = 15.8254(6) \text{ \AA}$ ,  $c = 20.0417(9) \text{ \AA}$ ,  $\beta = 106.109(2)^\circ$ ,  $V = 5522.3(4) \text{ \AA}^3$ ,  $T = 150(2) \text{ K}$ ,  $Z = 4$ ,  $D_{calc} = 1.712 \text{ g}\cdot\text{cm}^{-3}$ ,  $\lambda = 0.71073 \text{ \AA}$ ,  $\mu(Mo-K\alpha) = 3.360 \text{ mm}^{-1}$ , Gaussian correction ( $T_{min} = 0.47600$ ,  $T_{max} = 0.83841$ ), Bruker-AXS Kappa Mach3 with APEX-II detector and  $I\mu S$  micro focus Mo-anode X-ray source,  $1.169 < \theta < 30.508^\circ$ , 179506 measured reflections, 16869 independent reflections, 13456 reflections with  $I > 2\sigma(I)$ ,  $R_{int} = 0.0466$ . The structure was solved by *SHELXT* and refined by full-matrix least-squares (*SHELXL*) against  $F^2$  to  $R_1 = 0.0329$  [ $I > 2\sigma(I)$ ],  $wR_2 = 0.0809$  [all data] with 934 parameters and 102 restraints.

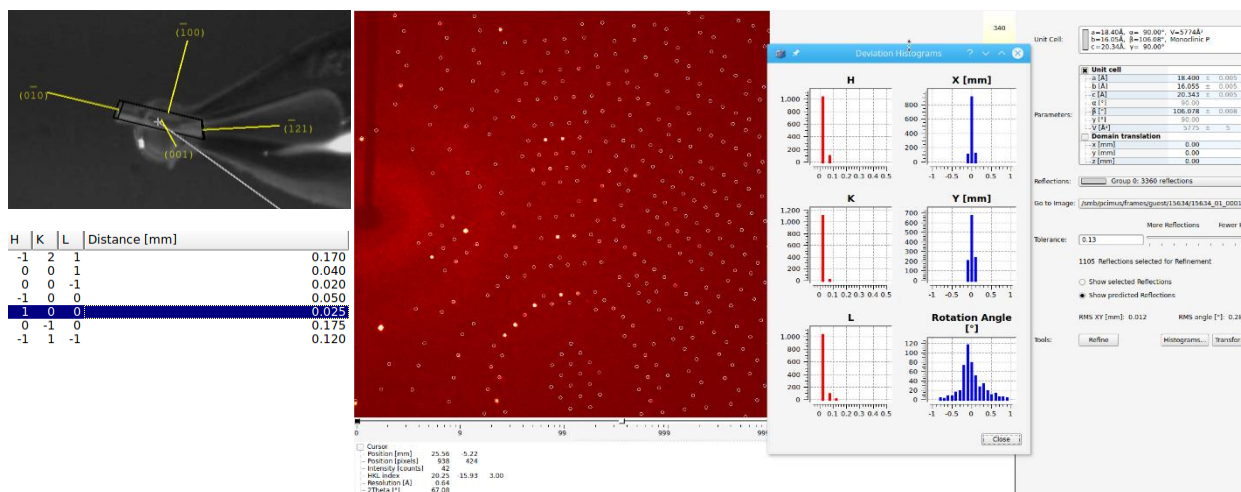

Figure S17: Crystal faces and unit cell determination/refinement of 10.

## INTENSITY STATISTICS FOR DATASET

| Resolution  | #Data | #Theory | %Complete | Redundancy | Mean I | Mean I/s | Rmerge | Rsigma |
|-------------|-------|---------|-----------|------------|--------|----------|--------|--------|
| Inf - 2.82  | 288   | 288     | 100.0     | 16.49      | 63.66  | 86.74    | 0.0240 | 0.0082 |
| 2.82 - 1.87 | 677   | 677     | 100.0     | 18.05      | 42.34  | 78.37    | 0.0227 | 0.0086 |
| 1.87 - 1.48 | 958   | 958     | 100.0     | 18.24      | 26.53  | 66.88    | 0.0271 | 0.0096 |
| 1.48 - 1.28 | 997   | 997     | 100.0     | 18.18      | 18.88  | 55.58    | 0.0330 | 0.0112 |
| 1.28 - 1.16 | 991   | 991     | 100.0     | 17.59      | 14.89  | 48.71    | 0.0420 | 0.0135 |
| 1.16 - 1.08 | 936   | 936     | 100.0     | 15.74      | 12.69  | 41.45    | 0.0489 | 0.0165 |
| 1.08 - 1.01 | 1034  | 1034    | 100.0     | 12.13      | 10.82  | 32.23    | 0.0566 | 0.0215 |
| 1.01 - 0.96 | 943   | 943     | 100.0     | 10.33      | 9.49   | 26.49    | 0.0650 | 0.0264 |
| 0.96 - 0.92 | 932   | 932     | 100.0     | 9.07       | 7.44   | 20.67    | 0.0766 | 0.0341 |
| 0.92 - 0.88 | 1081  | 1081    | 100.0     | 8.15       | 6.78   | 18.35    | 0.0844 | 0.0398 |
| 0.88 - 0.85 | 964   | 964     | 100.0     | 7.74       | 5.57   | 15.30    | 0.1025 | 0.0491 |
| 0.85 - 0.82 | 1103  | 1103    | 100.0     | 7.43       | 4.98   | 13.59    | 0.1155 | 0.0570 |
| 0.82 - 0.80 | 812   | 812     | 100.0     | 7.22       | 4.35   | 11.76    | 0.1281 | 0.0664 |
| 0.80 - 0.78 | 937   | 937     | 100.0     | 7.01       | 4.03   | 11.00    | 0.1440 | 0.0738 |
| 0.78 - 0.76 | 1006  | 1006    | 100.0     | 6.81       | 3.69   | 9.83     | 0.1589 | 0.0829 |
| 0.76 - 0.74 | 1133  | 1133    | 100.0     | 6.63       | 3.36   | 8.80     | 0.1740 | 0.0944 |
| 0.74 - 0.73 | 596   | 596     | 100.0     | 6.39       | 2.87   | 7.51     | 0.1969 | 0.1120 |
| 0.73 - 0.71 | 1329  | 1329    | 100.0     | 6.28       | 2.84   | 7.19     | 0.2098 | 0.1181 |
| 0.71 - 0.70 | 720   | 720     | 100.0     | 6.14       | 2.45   | 6.22     | 0.2297 | 0.1383 |
| 0.70 - 0.68 | 1726  | 1919    | 89.9      | 4.50       | 2.27   | 5.05     | 0.2570 | 0.1908 |
| 0.78 - 0.68 | 6510  | 6703    | 97.1      | 5.90       | 2.87   | 7.23     | 0.1997 | 0.1229 |
| Inf - 0.68  | 19163 | 19356   | 99.0      | 9.92       | 9.87   | 24.98    | 0.0470 | 0.0298 |

Complete .cif-data of the compound are available under the CCDC number **CCDC-2356071**.

A resolution cut-off (SHEL 999 0.70) was applied to the data set to exclude the poorly determined reflections at high diffraction angles. The terminal  $-CF_3$  groups show strong rotational disorders over two or more positions. The ISOR instruction was applied to several F atoms in the main part of the  $-CF_3$  rotational disorders. Atomic occupancies have been refined with fixed values and isotropic displacement parameters are applied to atoms in the minor parts of the disorder.

**Table S4:** Crystal data and structure refinement of **10**.

|                                   |                                                         |                          |
|-----------------------------------|---------------------------------------------------------|--------------------------|
| Identification code               | 15634                                                   |                          |
| Empirical formula                 | C <sub>56</sub> H <sub>39</sub> B Bi Cl F <sub>24</sub> |                          |
| Color                             | colourless                                              |                          |
| Formula weight                    | 1423.11 g·mol <sup>-1</sup>                             |                          |
| Temperature                       | 150(2) K                                                |                          |
| Wavelength                        | 0.71073 Å                                               |                          |
| Crystal system                    | Monoclinic                                              |                          |
| Space group                       | <i>P</i> 2 <sub>1</sub> / <i>c</i> , (no. 14)           |                          |
| Unit cell dimensions              | a = 18.1228(8) Å                                        | α = 90°.                 |
|                                   | b = 15.8254(6) Å                                        | β = 106.109(2)°.         |
|                                   | c = 20.0417(9) Å                                        | γ = 90°.                 |
| Volume                            | 5522.3(4) Å <sup>3</sup>                                |                          |
| Z                                 | 4                                                       |                          |
| Density (calculated)              | 1.712 Mg·m <sup>-3</sup>                                |                          |
| Absorption coefficient            | 3.360 mm <sup>-1</sup>                                  |                          |
| F(000)                            | 2784 e                                                  |                          |
| Crystal size                      | 0.422 x 0.15 x 0.083 mm <sup>3</sup>                    |                          |
| θ range for data collection       | 1.169 to 30.508°.                                       |                          |
| Index ranges                      | -25 ≤ h ≤ 25, -22 ≤ k ≤ 22, -28 ≤ l ≤ 28                |                          |
| Reflections collected             | 179506                                                  |                          |
| Independent reflections           | 16869 [R <sub>int</sub> = 0.0466]                       |                          |
| Reflections with I > 2σ(I)        | 13456                                                   |                          |
| Completeness to θ = 25.242°       | 100.0 %                                                 |                          |
| Absorption correction             | Gaussian                                                |                          |
| Max. and min. transmission        | 0.83841 and 0.47600                                     |                          |
| Refinement method                 | Full-matrix least-squares on F <sup>2</sup>             |                          |
| Data / restraints / parameters    | 16869 / 102 / 934                                       |                          |
| Goodness-of-fit on F <sup>2</sup> | 1.027                                                   |                          |
| Final R indices [I > 2σ(I)]       | R <sub>1</sub> = 0.0329                                 | wR <sup>2</sup> = 0.0741 |
| R indices (all data)              | R <sub>1</sub> = 0.0486                                 | wR <sup>2</sup> = 0.0809 |
| Extinction coefficient            | n/a                                                     |                          |
| Largest diff. peak and hole       | 1.721 and -1.012 e·Å <sup>-3</sup>                      |                          |

**Table S5:** Bond lengths [Å] and angles [°] of **10**.

---

|              |           |              |           |
|--------------|-----------|--------------|-----------|
| Bi(1)-Cl(1)  | 2.4028(8) | Bi(1)-C(1)   | 2.185(3)  |
| Bi(1)-C(9)   | 2.180(3)  | Bi(1)-C(17)  | 2.189(3)  |
| C(1)-C(2)    | 1.382(4)  | C(1)-C(6)    | 1.384(4)  |
| C(2)-H(2)    | 0.9500    | C(2)-C(3)    | 1.390(4)  |
| C(3)-C(4)    | 1.395(5)  | C(3)-C(7)    | 1.513(5)  |
| C(4)-H(4)    | 0.9500    | C(4)-C(5)    | 1.389(4)  |
| C(5)-C(6)    | 1.396(4)  | C(5)-C(8)    | 1.498(4)  |
| C(6)-H(6)    | 0.9500    | C(7)-H(7A)   | 0.9800    |
| C(7)-H(7B)   | 0.9800    | C(7)-H(7C)   | 0.9800    |
| C(8)-H(8A)   | 0.9800    | C(8)-H(8B)   | 0.9800    |
| C(8)-H(8C)   | 0.9800    | C(9)-C(10)   | 1.381(4)  |
| C(9)-C(14)   | 1.383(4)  | C(10)-H(10)  | 0.9500    |
| C(10)-C(11)  | 1.399(4)  | C(11)-C(12)  | 1.389(5)  |
| C(11)-C(15)  | 1.501(4)  | C(12)-H(12)  | 0.9500    |
| C(12)-C(13)  | 1.389(5)  | C(13)-C(14)  | 1.389(4)  |
| C(13)-C(16)  | 1.507(5)  | C(14)-H(14)  | 0.9500    |
| C(15)-H(15A) | 0.9800    | C(15)-H(15B) | 0.9800    |
| C(15)-H(15C) | 0.9800    | C(16)-H(16A) | 0.9800    |
| C(16)-H(16B) | 0.9800    | C(16)-H(16C) | 0.9800    |
| C(17)-C(18)  | 1.387(4)  | C(17)-C(22)  | 1.380(4)  |
| C(18)-H(18)  | 0.9500    | C(18)-C(19)  | 1.392(5)  |
| C(19)-C(20)  | 1.387(5)  | C(19)-C(23)  | 1.512(5)  |
| C(20)-H(20)  | 0.9500    | C(20)-C(21)  | 1.387(5)  |
| C(21)-C(22)  | 1.395(4)  | C(21)-C(24)  | 1.503(5)  |
| C(22)-H(22)  | 0.9500    | C(23)-H(23A) | 0.9800    |
| C(23)-H(23B) | 0.9800    | C(23)-H(23C) | 0.9800    |
| C(24)-H(24A) | 0.9800    | C(24)-H(24B) | 0.9800    |
| C(24)-H(24C) | 0.9800    | C(25)-C(26)  | 1.398(4)  |
| C(25)-C(30)  | 1.398(4)  | C(25)-B(1)   | 1.645(4)  |
| C(26)-H(26)  | 0.9500    | C(26)-C(27)  | 1.397(4)  |
| C(27)-C(28)  | 1.382(4)  | C(27)-C(31)  | 1.497(4)  |
| C(28)-H(28)  | 0.9500    | C(28)-C(29)  | 1.387(4)  |
| C(29)-C(30)  | 1.392(4)  | C(29)-C(32)  | 1.488(4)  |
| C(30)-H(30)  | 0.9500    | C(31)-F(1A)  | 1.408(8)  |
| C(31)-F(2A)  | 1.339(8)  | C(31)-F(3A)  | 1.332(17) |
| C(31)-F(1B)  | 1.26(4)   | C(31)-F(2B)  | 1.35(3)   |

|              |           |              |           |
|--------------|-----------|--------------|-----------|
| C(31)-F(3B)  | 1.32(6)   | C(31)-F(1C)  | 1.23(3)   |
| C(31)-F(2C)  | 1.40(4)   | C(31)-F(3C)  | 1.41(4)   |
| C(32)-F(4A)  | 1.344(5)  | C(32)-F(5A)  | 1.371(5)  |
| C(32)-F(6A)  | 1.320(5)  | C(32)-F(4B)  | 1.295(16) |
| C(32)-F(5B)  | 1.292(14) | C(32)-F(6B)  | 1.430(18) |
| C(32)-F(4C)  | 1.333(17) | C(32)-F(5C)  | 1.342(17) |
| C(32)-F(6C)  | 1.359(16) | C(33)-C(34)  | 1.399(4)  |
| C(33)-C(38)  | 1.398(4)  | C(33)-B(1)   | 1.648(4)  |
| C(34)-H(34)  | 0.9500    | C(34)-C(35)  | 1.390(4)  |
| C(35)-C(36)  | 1.376(4)  | C(35)-C(39)  | 1.496(4)  |
| C(36)-H(36)  | 0.9500    | C(36)-C(37)  | 1.380(4)  |
| C(37)-C(38)  | 1.390(4)  | C(37)-C(40)  | 1.487(4)  |
| C(38)-H(38)  | 0.9500    | C(39)-F(7A)  | 1.283(6)  |
| C(39)-F(8A)  | 1.361(6)  | C(39)-F(9A)  | 1.366(5)  |
| C(39)-F(7B)  | 1.430(7)  | C(39)-F(8B)  | 1.332(9)  |
| C(39)-F(9B)  | 1.307(8)  | C(40)-F(10A) | 1.334(5)  |
| C(40)-F(11A) | 1.307(6)  | C(40)-F(12A) | 1.367(6)  |
| C(40)-F(10B) | 1.369(12) | C(40)-F(11B) | 1.341(9)  |
| C(40)-F(12B) | 1.367(11) | C(40)-F(10C) | 1.265(11) |
| C(40)-F(11C) | 1.430(10) | C(40)-F(12C) | 1.343(11) |
| C(41)-C(42)  | 1.395(4)  | C(41)-C(46)  | 1.405(4)  |
| C(41)-B(1)   | 1.642(4)  | C(42)-H(42)  | 0.9500    |
| C(42)-C(43)  | 1.394(4)  | C(43)-C(44)  | 1.383(4)  |
| C(43)-C(47)  | 1.493(4)  | C(44)-H(44)  | 0.9500    |
| C(44)-C(45)  | 1.388(4)  | C(45)-C(46)  | 1.387(4)  |
| C(45)-C(48)  | 1.497(4)  | C(46)-H(46)  | 0.9500    |
| C(47)-F(13A) | 1.300(6)  | C(47)-F(14A) | 1.356(6)  |
| C(47)-F(15A) | 1.342(5)  | C(47)-F(13B) | 1.310(15) |
| C(47)-F(14B) | 1.244(17) | C(47)-F(15B) | 1.397(13) |
| C(47)-F(13C) | 1.561(17) | C(47)-F(14C) | 1.396(15) |
| C(47)-F(15C) | 1.334(12) | C(48)-F(16A) | 1.341(9)  |
| C(48)-F(17A) | 1.345(6)  | C(48)-F(18A) | 1.358(6)  |
| C(48)-F(16B) | 1.49(4)   | C(48)-F(17B) | 1.42(2)   |
| C(48)-F(18B) | 1.250(17) | C(48)-F(16C) | 1.18(2)   |
| C(48)-F(17C) | 1.29(2)   | C(48)-F(18C) | 1.488(17) |
| C(49)-C(50)  | 1.394(4)  | C(49)-C(54)  | 1.400(4)  |
| C(49)-B(1)   | 1.644(4)  | C(50)-H(50)  | 0.9500    |
| C(50)-C(51)  | 1.388(4)  | C(51)-C(52)  | 1.379(5)  |

|                   |            |                   |            |
|-------------------|------------|-------------------|------------|
| C(51)-C(55A)      | 1.560(7)   | C(51)-C(55B)      | 1.440(10)  |
| C(52)-H(52)       | 0.9500     | C(52)-C(53)       | 1.387(4)   |
| C(53)-C(54)       | 1.389(4)   | C(53)-C(56A)      | 1.491(9)   |
| C(53)-C(56B)      | 1.646(18)  | C(53)-C(56C)      | 1.41(2)    |
| C(54)-H(54)       | 0.9500     | F(19A)-C(55A)     | 1.339(7)   |
| F(20A)-C(55A)     | 1.208(8)   | F(21A)-C(55A)     | 1.384(7)   |
| F(22A)-C(56A)     | 1.348(10)  | F(23A)-C(56A)     | 1.389(12)  |
| F(24A)-C(56A)     | 1.309(11)  | F(19B)-C(55B)     | 1.497(13)  |
| F(20B)-C(55B)     | 1.350(17)  | F(21B)-C(55B)     | 1.184(18)  |
| F(22B)-C(56B)     | 1.297(19)  | F(23B)-C(56B)     | 1.26(3)    |
| F(24B)-C(56B)     | 1.38(2)    | F(22C)-C(56C)     | 1.32(2)    |
| F(23C)-C(56C)     | 1.39(2)    | F(24C)-C(56C)     | 1.35(2)    |
| C(1)-Bi(1)-Cl(1)  | 101.22(8)  | C(1)-Bi(1)-C(17)  | 111.32(10) |
| C(9)-Bi(1)-Cl(1)  | 105.68(7)  | C(9)-Bi(1)-C(1)   | 121.63(11) |
| C(9)-Bi(1)-C(17)  | 112.55(11) | C(17)-Bi(1)-Cl(1) | 101.47(8)  |
| C(2)-C(1)-Bi(1)   | 116.4(2)   | C(2)-C(1)-C(6)    | 123.4(3)   |
| C(6)-C(1)-Bi(1)   | 119.8(2)   | C(1)-C(2)-H(2)    | 120.8      |
| C(1)-C(2)-C(3)    | 118.4(3)   | C(3)-C(2)-H(2)    | 120.8      |
| C(2)-C(3)-C(4)    | 118.7(3)   | C(2)-C(3)-C(7)    | 119.9(3)   |
| C(4)-C(3)-C(7)    | 121.4(3)   | C(3)-C(4)-H(4)    | 118.7      |
| C(5)-C(4)-C(3)    | 122.6(3)   | C(5)-C(4)-H(4)    | 118.7      |
| C(4)-C(5)-C(6)    | 118.4(3)   | C(4)-C(5)-C(8)    | 121.0(3)   |
| C(6)-C(5)-C(8)    | 120.6(3)   | C(1)-C(6)-C(5)    | 118.5(3)   |
| C(1)-C(6)-H(6)    | 120.7      | C(5)-C(6)-H(6)    | 120.7      |
| C(3)-C(7)-H(7A)   | 109.5      | C(3)-C(7)-H(7B)   | 109.5      |
| C(3)-C(7)-H(7C)   | 109.5      | H(7A)-C(7)-H(7B)  | 109.5      |
| H(7A)-C(7)-H(7C)  | 109.5      | H(7B)-C(7)-H(7C)  | 109.5      |
| C(5)-C(8)-H(8A)   | 109.5      | C(5)-C(8)-H(8B)   | 109.5      |
| C(5)-C(8)-H(8C)   | 109.5      | H(8A)-C(8)-H(8B)  | 109.5      |
| H(8A)-C(8)-H(8C)  | 109.5      | H(8B)-C(8)-H(8C)  | 109.5      |
| C(10)-C(9)-Bi(1)  | 120.3(2)   | C(10)-C(9)-C(14)  | 124.2(3)   |
| C(14)-C(9)-Bi(1)  | 115.5(2)   | C(9)-C(10)-H(10)  | 121.3      |
| C(9)-C(10)-C(11)  | 117.4(3)   | C(11)-C(10)-H(10) | 121.3      |
| C(10)-C(11)-C(15) | 120.3(3)   | C(12)-C(11)-C(10) | 118.8(3)   |
| C(12)-C(11)-C(15) | 120.9(3)   | C(11)-C(12)-H(12) | 118.5      |
| C(11)-C(12)-C(13) | 123.0(3)   | C(13)-C(12)-H(12) | 118.5      |
| C(12)-C(13)-C(14) | 118.3(3)   | C(12)-C(13)-C(16) | 121.2(3)   |



|                     |           |                     |           |
|---------------------|-----------|---------------------|-----------|
| C(14)-C(13)-C(16)   | 120.4(3)  | C(9)-C(14)-C(13)    | 118.3(3)  |
| C(9)-C(14)-H(14)    | 120.9     | C(13)-C(14)-H(14)   | 120.9     |
| C(11)-C(15)-H(15A)  | 109.5     | C(11)-C(15)-H(15B)  | 109.5     |
| C(11)-C(15)-H(15C)  | 109.5     | H(15A)-C(15)-H(15B) | 109.5     |
| H(15A)-C(15)-H(15C) | 109.5     | H(15B)-C(15)-H(15C) | 109.5     |
| C(13)-C(16)-H(16A)  | 109.5     | C(13)-C(16)-H(16B)  | 109.5     |
| C(13)-C(16)-H(16C)  | 109.5     | H(16A)-C(16)-H(16B) | 109.5     |
| H(16A)-C(16)-H(16C) | 109.5     | H(16B)-C(16)-H(16C) | 109.5     |
| C(18)-C(17)-Bi(1)   | 117.0(2)  | C(22)-C(17)-Bi(1)   | 119.4(2)  |
| C(22)-C(17)-C(18)   | 123.6(3)  | C(17)-C(18)-H(18)   | 120.8     |
| C(17)-C(18)-C(19)   | 118.3(3)  | C(19)-C(18)-H(18)   | 120.8     |
| C(18)-C(19)-C(23)   | 120.3(4)  | C(20)-C(19)-C(18)   | 118.2(3)  |
| C(20)-C(19)-C(23)   | 121.5(3)  | C(19)-C(20)-H(20)   | 118.4     |
| C(19)-C(20)-C(21)   | 123.3(3)  | C(21)-C(20)-H(20)   | 118.4     |
| C(20)-C(21)-C(22)   | 118.5(3)  | C(20)-C(21)-C(24)   | 121.7(3)  |
| C(22)-C(21)-C(24)   | 119.8(3)  | C(17)-C(22)-C(21)   | 118.1(3)  |
| C(17)-C(22)-H(22)   | 121.0     | C(21)-C(22)-H(22)   | 121.0     |
| C(19)-C(23)-H(23A)  | 109.5     | C(19)-C(23)-H(23B)  | 109.5     |
| C(19)-C(23)-H(23C)  | 109.5     | H(23A)-C(23)-H(23B) | 109.5     |
| H(23A)-C(23)-H(23C) | 109.5     | H(23B)-C(23)-H(23C) | 109.5     |
| C(21)-C(24)-H(24A)  | 109.5     | C(21)-C(24)-H(24B)  | 109.5     |
| C(21)-C(24)-H(24C)  | 109.5     | H(24A)-C(24)-H(24B) | 109.5     |
| H(24A)-C(24)-H(24C) | 109.5     | H(24B)-C(24)-H(24C) | 109.5     |
| C(26)-C(25)-C(30)   | 115.7(2)  | C(26)-C(25)-B(1)    | 124.0(2)  |
| C(30)-C(25)-B(1)    | 120.4(2)  | C(25)-C(26)-H(26)   | 119.1     |
| C(27)-C(26)-C(25)   | 121.8(2)  | C(27)-C(26)-H(26)   | 119.1     |
| C(26)-C(27)-C(31)   | 118.7(2)  | C(28)-C(27)-C(26)   | 121.3(2)  |
| C(28)-C(27)-C(31)   | 119.8(2)  | C(27)-C(28)-H(28)   | 121.0     |
| C(27)-C(28)-C(29)   | 118.0(2)  | C(29)-C(28)-H(28)   | 121.0     |
| C(28)-C(29)-C(30)   | 120.4(2)  | C(28)-C(29)-C(32)   | 120.4(3)  |
| C(30)-C(29)-C(32)   | 119.1(3)  | C(25)-C(30)-H(30)   | 118.6     |
| C(29)-C(30)-C(25)   | 122.8(2)  | C(29)-C(30)-H(30)   | 118.6     |
| F(1A)-C(31)-C(27)   | 109.8(5)  | F(2A)-C(31)-C(27)   | 112.7(4)  |
| F(2A)-C(31)-F(1A)   | 107.0(11) | F(3A)-C(31)-C(27)   | 111.8(8)  |
| F(3A)-C(31)-F(1A)   | 110.3(12) | F(3A)-C(31)-F(2A)   | 105.1(9)  |
| F(1B)-C(31)-C(27)   | 120.7(11) | F(1B)-C(31)-F(2B)   | 106.1(16) |
| F(1B)-C(31)-F(3B)   | 102(3)    | F(2B)-C(31)-C(27)   | 114.0(12) |
| F(3B)-C(31)-C(27)   | 111(2)    | F(3B)-C(31)-F(2B)   | 100(2)    |

|                     |           |                     |           |
|---------------------|-----------|---------------------|-----------|
| F(1C)-C(31)-C(27)   | 116.7(16) | F(1C)-C(31)-F(2C)   | 105(2)    |
| F(1C)-C(31)-F(3C)   | 96.8(18)  | F(2C)-C(31)-C(27)   | 109.3(14) |
| F(2C)-C(31)-F(3C)   | 115.7(18) | F(3C)-C(31)-C(27)   | 113.1(13) |
| F(4A)-C(32)-C(29)   | 113.9(3)  | F(4A)-C(32)-F(5A)   | 106.1(4)  |
| F(5A)-C(32)-C(29)   | 111.2(3)  | F(6A)-C(32)-C(29)   | 114.0(3)  |
| F(6A)-C(32)-F(4A)   | 105.7(4)  | F(6A)-C(32)-F(5A)   | 105.3(4)  |
| F(4B)-C(32)-C(29)   | 113.4(7)  | F(4B)-C(32)-F(6B)   | 109.9(9)  |
| F(5B)-C(32)-C(29)   | 114.3(7)  | F(5B)-C(32)-F(4B)   | 113.7(10) |
| F(5B)-C(32)-F(6B)   | 98.6(9)   | F(6B)-C(32)-C(29)   | 105.4(7)  |
| F(4C)-C(32)-C(29)   | 112.7(7)  | F(4C)-C(32)-F(5C)   | 107.6(9)  |
| F(4C)-C(32)-F(6C)   | 107.0(9)  | F(5C)-C(32)-C(29)   | 110.6(8)  |
| F(5C)-C(32)-F(6C)   | 102.5(9)  | F(6C)-C(32)-C(29)   | 115.7(7)  |
| C(34)-C(33)-B(1)    | 122.5(2)  | C(38)-C(33)-C(34)   | 115.4(2)  |
| C(38)-C(33)-B(1)    | 122.1(2)  | C(33)-C(34)-H(34)   | 118.8     |
| C(35)-C(34)-C(33)   | 122.4(3)  | C(35)-C(34)-H(34)   | 118.8     |
| C(34)-C(35)-C(39)   | 119.1(3)  | C(36)-C(35)-C(34)   | 120.9(3)  |
| C(36)-C(35)-C(39)   | 119.8(3)  | C(35)-C(36)-H(36)   | 121.0     |
| C(35)-C(36)-C(37)   | 117.9(3)  | C(37)-C(36)-H(36)   | 121.0     |
| C(36)-C(37)-C(38)   | 121.2(3)  | C(36)-C(37)-C(40)   | 118.8(3)  |
| C(38)-C(37)-C(40)   | 119.9(3)  | C(33)-C(38)-H(38)   | 119.0     |
| C(37)-C(38)-C(33)   | 122.0(3)  | C(37)-C(38)-H(38)   | 119.0     |
| F(7A)-C(39)-C(35)   | 116.0(3)  | F(7A)-C(39)-F(8A)   | 105.0(4)  |
| F(7A)-C(39)-F(9A)   | 106.2(4)  | F(8A)-C(39)-C(35)   | 110.4(3)  |
| F(8A)-C(39)-F(9A)   | 107.7(4)  | F(9A)-C(39)-C(35)   | 111.0(3)  |
| F(7B)-C(39)-C(35)   | 108.7(4)  | F(8B)-C(39)-C(35)   | 113.3(4)  |
| F(8B)-C(39)-F(7B)   | 103.9(5)  | F(9B)-C(39)-C(35)   | 115.5(4)  |
| F(9B)-C(39)-F(7B)   | 110.8(5)  | F(9B)-C(39)-F(8B)   | 103.9(5)  |
| F(10A)-C(40)-C(37)  | 113.3(3)  | F(10A)-C(40)-F(12A) | 103.4(4)  |
| F(11A)-C(40)-C(37)  | 115.1(3)  | F(11A)-C(40)-F(10A) | 108.5(4)  |
| F(11A)-C(40)-F(12A) | 104.9(4)  | F(12A)-C(40)-C(37)  | 110.8(3)  |
| F(10B)-C(40)-C(37)  | 112.0(6)  | F(11B)-C(40)-C(37)  | 114.2(4)  |
| F(11B)-C(40)-F(10B) | 104.7(7)  | F(11B)-C(40)-F(12B) | 104.3(7)  |
| F(12B)-C(40)-C(37)  | 113.5(5)  | F(12B)-C(40)-F(10B) | 107.3(8)  |
| F(10C)-C(40)-C(37)  | 118.3(6)  | F(10C)-C(40)-F(11C) | 109.6(7)  |
| F(10C)-C(40)-F(12C) | 106.1(8)  | F(11C)-C(40)-C(37)  | 109.5(4)  |
| F(12C)-C(40)-C(37)  | 112.2(5)  | F(12C)-C(40)-F(11C) | 99.3(7)   |
| C(42)-C(41)-C(46)   | 115.3(2)  | C(42)-C(41)-B(1)    | 123.9(2)  |
| C(46)-C(41)-B(1)    | 120.8(2)  | C(41)-C(42)-H(42)   | 118.8     |

|                     |           |                     |           |
|---------------------|-----------|---------------------|-----------|
| C(43)-C(42)-C(41)   | 122.4(3)  | C(43)-C(42)-H(42)   | 118.8     |
| C(42)-C(43)-C(47)   | 119.2(3)  | C(44)-C(43)-C(42)   | 120.9(3)  |
| C(44)-C(43)-C(47)   | 119.8(3)  | C(43)-C(44)-H(44)   | 121.0     |
| C(43)-C(44)-C(45)   | 117.9(3)  | C(45)-C(44)-H(44)   | 121.0     |
| C(44)-C(45)-C(48)   | 119.7(3)  | C(46)-C(45)-C(44)   | 120.7(3)  |
| C(46)-C(45)-C(48)   | 119.6(3)  | C(41)-C(46)-H(46)   | 118.7     |
| C(45)-C(46)-C(41)   | 122.6(3)  | C(45)-C(46)-H(46)   | 118.7     |
| C(43)-C(47)-F(13C)  | 104.8(7)  | F(13A)-C(47)-C(43)  | 113.1(3)  |
| F(13A)-C(47)-F(14A) | 103.5(4)  | F(13A)-C(47)-F(15A) | 107.7(4)  |
| F(14A)-C(47)-C(43)  | 112.8(3)  | F(15A)-C(47)-C(43)  | 112.1(3)  |
| F(15A)-C(47)-F(14A) | 107.0(4)  | F(13B)-C(47)-C(43)  | 113.7(7)  |
| F(13B)-C(47)-F(15B) | 104.5(8)  | F(14B)-C(47)-C(43)  | 118.6(8)  |
| F(14B)-C(47)-F(13B) | 104.2(10) | F(14B)-C(47)-F(15B) | 107.3(9)  |
| F(15B)-C(47)-C(43)  | 107.5(6)  | F(14C)-C(47)-C(43)  | 109.7(7)  |
| F(14C)-C(47)-F(13C) | 114.2(9)  | F(15C)-C(47)-C(43)  | 118.1(6)  |
| F(15C)-C(47)-F(13C) | 94.9(8)   | F(15C)-C(47)-F(14C) | 114.0(8)  |
| F(16A)-C(48)-C(45)  | 112.8(5)  | F(16A)-C(48)-F(17A) | 105.4(5)  |
| F(16A)-C(48)-F(18A) | 105.8(6)  | F(17A)-C(48)-C(45)  | 113.2(4)  |
| F(17A)-C(48)-F(18A) | 106.4(4)  | F(18A)-C(48)-C(45)  | 112.6(3)  |
| F(16B)-C(48)-C(45)  | 105.3(14) | F(17B)-C(48)-C(45)  | 109.2(9)  |
| F(17B)-C(48)-F(16B) | 117.6(17) | F(18B)-C(48)-C(45)  | 116.8(8)  |
| F(18B)-C(48)-F(16B) | 97.6(16)  | F(18B)-C(48)-F(17B) | 110.3(11) |
| F(16C)-C(48)-C(45)  | 119.6(13) | F(16C)-C(48)-F(17C) | 101.1(14) |
| F(16C)-C(48)-F(18C) | 106.7(12) | F(17C)-C(48)-C(45)  | 114.0(10) |
| F(17C)-C(48)-F(18C) | 110.8(10) | F(18C)-C(48)-C(45)  | 104.5(7)  |
| C(50)-C(49)-C(54)   | 115.7(2)  | C(50)-C(49)-B(1)    | 122.6(2)  |
| C(54)-C(49)-B(1)    | 121.4(2)  | C(49)-C(50)-H(50)   | 118.9     |
| C(51)-C(50)-C(49)   | 122.1(3)  | C(51)-C(50)-H(50)   | 118.9     |
| C(50)-C(51)-C(55A)  | 117.1(3)  | C(50)-C(51)-C(55B)  | 123.6(5)  |
| C(52)-C(51)-C(50)   | 121.4(3)  | C(52)-C(51)-C(55A)  | 120.9(3)  |
| C(52)-C(51)-C(55B)  | 113.7(5)  | C(51)-C(52)-H(52)   | 121.2     |
| C(51)-C(52)-C(53)   | 117.6(3)  | C(53)-C(52)-H(52)   | 121.2     |
| C(52)-C(53)-C(54)   | 120.9(3)  | C(52)-C(53)-C(56A)  | 119.1(4)  |
| C(52)-C(53)-C(56B)  | 119.6(6)  | C(52)-C(53)-C(56C)  | 112.5(8)  |
| C(54)-C(53)-C(56A)  | 119.9(4)  | C(54)-C(53)-C(56B)  | 118.0(7)  |
| C(54)-C(53)-C(56C)  | 124.6(8)  | C(49)-C(54)-H(54)   | 118.9     |
| C(53)-C(54)-C(49)   | 122.2(3)  | C(53)-C(54)-H(54)   | 118.9     |
| C(25)-B(1)-C(33)    | 110.0(2)  | C(41)-B(1)-C(25)    | 106.3(2)  |

|                      |           |                      |           |
|----------------------|-----------|----------------------|-----------|
| C(41)-B(1)-C(33)     | 112.2(2)  | C(41)-B(1)-C(49)     | 111.3(2)  |
| C(49)-B(1)-C(25)     | 112.3(2)  | C(49)-B(1)-C(33)     | 104.8(2)  |
| F(19A)-C(55A)-C(51)  | 109.6(5)  | F(19A)-C(55A)-F(21A) | 102.5(5)  |
| F(20A)-C(55A)-C(51)  | 116.6(5)  | F(20A)-C(55A)-F(19A) | 112.4(6)  |
| F(20A)-C(55A)-F(21A) | 108.7(6)  | F(21A)-C(55A)-C(51)  | 106.1(5)  |
| F(22A)-C(56A)-C(53)  | 110.9(6)  | F(22A)-C(56A)-F(23A) | 103.1(8)  |
| F(23A)-C(56A)-C(53)  | 113.1(6)  | F(24A)-C(56A)-C(53)  | 113.6(8)  |
| F(24A)-C(56A)-F(22A) | 105.7(7)  | F(24A)-C(56A)-F(23A) | 109.6(7)  |
| C(51)-C(55B)-F(19B)  | 106.2(8)  | F(20B)-C(55B)-C(51)  | 112.8(9)  |
| F(20B)-C(55B)-F(19B) | 94.2(9)   | F(21B)-C(55B)-C(51)  | 121.3(12) |
| F(21B)-C(55B)-F(19B) | 106.5(11) | F(21B)-C(55B)-F(20B) | 111.7(13) |
| F(22B)-C(56B)-C(53)  | 113.7(12) | F(22B)-C(56B)-F(24B) | 102.9(12) |
| F(23B)-C(56B)-C(53)  | 110.8(14) | F(23B)-C(56B)-F(22B) | 121.4(18) |
| F(23B)-C(56B)-F(24B) | 101.9(14) | F(24B)-C(56B)-C(53)  | 103.3(13) |
| F(22C)-C(56C)-C(53)  | 118.5(15) | F(22C)-C(56C)-F(23C) | 99.7(15)  |
| F(22C)-C(56C)-F(24C) | 109.4(16) | F(23C)-C(56C)-C(53)  | 103.8(15) |
| F(24C)-C(56C)-C(53)  | 118.1(16) | F(24C)-C(56C)-F(23C) | 104.2(14) |

---

9.3 Single crystal structure analysis of ((chloromesityl- $\lambda^5$ -bismuth)oxy)pyridinium tetrakis(3,5-bis(trifluoromethyl)phenyl)borate (13)

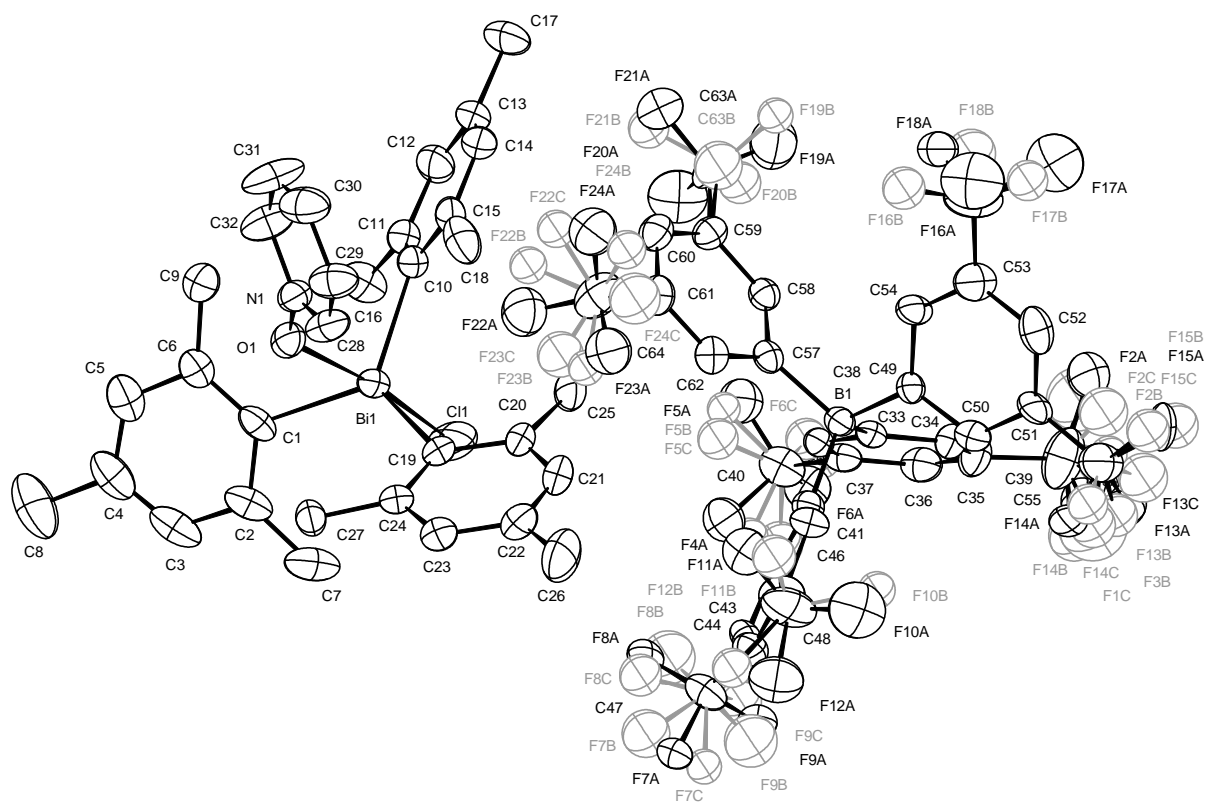

**Figure S18:** The solid state structure of **13**. H atoms have been removed for clarity and disordered parts shown in grey.

X-ray Crystal Structure Analysis:

$C_{64}H_{50}BBiClF_{24}NO$ ,  $M_r = 1560.29 \text{ g mol}^{-1}$ , colourless prism, crystal size  $0.284 \times 0.122 \times 0.119 \text{ mm}^3$ , triclinic, space group  $P1 [1]$ ,  $a = 10.8125(4) \text{ \AA}$ ,  $b = 12.0526(4) \text{ \AA}$ ,  $c = 13.0336(5) \text{ \AA}$ ,  $\alpha = 91.274(2)^\circ$ ,  $\beta = 104.828(2)^\circ$ ,  $\gamma = 99.677(2)$ ,  $V = 1614.80(10) \text{ \AA}^3$ ,  $T = 150(2) \text{ K}$ ,  $Z = 1$ ,  $D_{calc} = 1.604 \text{ g}\cdot\text{cm}^{-3}$ ,  $\lambda = 0.71073 \text{ \AA}$ ,  $\mu(Mo-K\alpha) = 2.882 \text{ mm}^{-1}$ , Gaussian correction ( $T_{min} = 0.52512$ ,  $T_{max} = 0.83538$ ), Bruker-AXS Kappa Mach3 with APEX-II detector and  $\text{I}\mu\text{S}$  micro focus Mo-anode X-ray source,  $1.620 < \theta < 30.032^\circ$ , 45758 measured reflections, 17115 independent reflections, 15711 reflections with  $I > 2\sigma(I)$ ,  $R_{int} = 0.0352$ . The structure was solved by *SHELXT* and refined by full-matrix least-squares (*SHELXL*) against  $F^2$  to  $R_1 = 0.0371 [I > 2\sigma(I)]$ ,  $wR_2 = 0.0806$  [all data] with 1007 parameters, 148 restraints and an absolute structure parameter  $x = 0.003(3)$ .

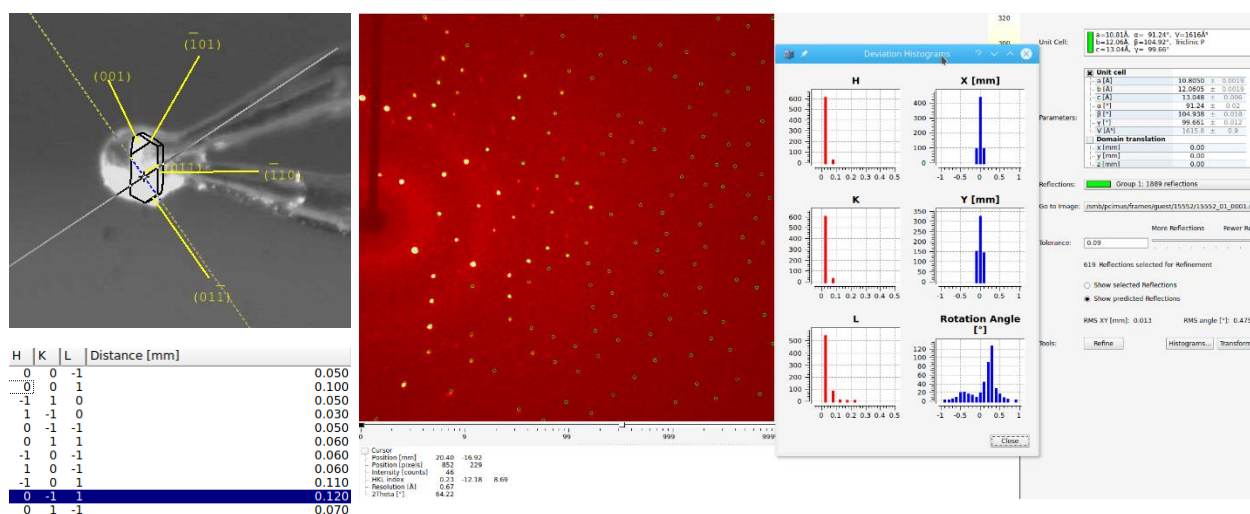

Figure S19: Crystal faces and unit cell determination/refinement of 13.

#### INTENSITY STATISTICS FOR DATASET

| Resolution  | #Data | #Theory | %Complete | Redundancy | Mean I | Mean I/s | Rmerge | Rsigma |
|-------------|-------|---------|-----------|------------|--------|----------|--------|--------|
| Inf - 2.79  | 155   | 156     | 99.4      | 7.27       | 181.93 | 34.81    | 0.0564 | 0.0294 |
| 2.79 - 1.86 | 364   | 366     | 99.5      | 7.59       | 101.75 | 34.92    | 0.0495 | 0.0293 |
| 1.86 - 1.48 | 519   | 520     | 99.8      | 7.73       | 57.33  | 33.92    | 0.0468 | 0.0301 |
| 1.48 - 1.29 | 536   | 537     | 99.8      | 7.88       | 39.17  | 32.63    | 0.0565 | 0.0312 |
| 1.29 - 1.17 | 532   | 532     | 100.0     | 7.67       | 28.12  | 29.56    | 0.0660 | 0.0338 |
| 1.17 - 1.09 | 490   | 490     | 100.0     | 6.96       | 23.54  | 26.21    | 0.0722 | 0.0382 |
| 1.09 - 1.02 | 592   | 592     | 100.0     | 5.66       | 19.24  | 21.68    | 0.0754 | 0.0463 |
| 1.02 - 0.97 | 503   | 503     | 100.0     | 5.00       | 15.37  | 18.65    | 0.0819 | 0.0526 |
| 0.97 - 0.93 | 493   | 494     | 99.8      | 4.36       | 12.25  | 15.72    | 0.0894 | 0.0632 |
| 0.93 - 0.89 | 624   | 624     | 100.0     | 4.08       | 9.86   | 13.54    | 0.0993 | 0.0725 |
| 0.89 - 0.86 | 489   | 489     | 100.0     | 3.74       | 8.12   | 11.21    | 0.1150 | 0.0885 |
| 0.86 - 0.84 | 418   | 418     | 100.0     | 3.69       | 7.08   | 9.94     | 0.1301 | 0.0986 |
| 0.84 - 0.81 | 642   | 644     | 99.7      | 3.52       | 6.42   | 8.84     | 0.1336 | 0.1126 |
| 0.81 - 0.79 | 498   | 498     | 100.0     | 3.51       | 5.27   | 7.47     | 0.1571 | 0.1334 |
| 0.79 - 0.77 | 531   | 532     | 99.8      | 3.34       | 4.84   | 6.59     | 0.1715 | 0.1516 |
| 0.77 - 0.75 | 621   | 622     | 99.8      | 3.18       | 4.06   | 5.39     | 0.1932 | 0.1873 |
| 0.75 - 0.74 | 346   | 347     | 99.7      | 3.27       | 3.44   | 4.72     | 0.2190 | 0.2173 |
| 0.74 - 0.72 | 689   | 692     | 99.6      | 3.07       | 3.23   | 4.12     | 0.2341 | 0.2470 |
| 0.72 - 0.71 | 387   | 391     | 99.0      | 2.93       | 2.64   | 3.36     | 0.2582 | 0.3070 |
| 0.71 - 0.70 | 414   | 418     | 99.0      | 2.93       | 2.57   | 3.14     | 0.2802 | 0.3260 |
| 0.70 - 0.69 | 488   | 538     | 90.7      | 2.46       | 2.27   | 2.65     | 0.2946 | 0.3931 |
| 0.79 - 0.69 | 3476  | 3540    | 98.2      | 3.02       | 3.37   | 4.38     | 0.2201 | 0.2364 |
| Inf - 0.69  | 10331 | 10403   | 99.3      | 4.64       | 19.28  | 14.95    | 0.0650 | 0.0522 |

Complete .cif-data of the compound are available under the CCDC number **CCDC-2356070**.

A resolution cut-off (SHEL 999 0.71) was applied to the data set to exclude the poorly determined reflections at high diffraction angles. The terminal  $-\text{CF}_3$  groups show strong rotational disorders over two or more positions. They were partially described using the DSR tool plug-in in Olex2.<sup>9,10</sup> For the minor parts of the disorders isotropic displacement parameters were used and atoms were refined with

fixed occupancy values. The ISOR instruction was applied to several F atoms in the main part of the - CF<sub>3</sub> rotational disorders. In addition, the DFIX instruction was used to fix the C...F distances.

**Table S6:** Crystal data and structure refinement of **13**.

|                                                     |                                                               |                                 |
|-----------------------------------------------------|---------------------------------------------------------------|---------------------------------|
| Identification code                                 | 15552                                                         |                                 |
| Empirical formula                                   | C <sub>64</sub> H <sub>50</sub> B Bi Cl F <sub>24</sub> N O   |                                 |
| Color                                               | colourless                                                    |                                 |
| Formula weight                                      | 1560.29 g·mol <sup>-1</sup>                                   |                                 |
| Temperature                                         | 150(2) K                                                      |                                 |
| Wavelength                                          | 0.71073 Å                                                     |                                 |
| Crystal system                                      | Triclinic                                                     |                                 |
| Space group                                         | <i>P</i> 1, (no. 1)                                           |                                 |
| Unit cell dimensions                                | <i>a</i> = 10.8125(4) Å                                       | $\alpha = 91.274(2)^\circ$ .    |
|                                                     | <i>b</i> = 12.0526(4) Å                                       | $\beta = 104.828(2)^\circ$ .    |
|                                                     | <i>c</i> = 13.0336(5) Å                                       | $\gamma = 99.677(2)^\circ$ .    |
| Volume                                              | 1614.80(10) Å <sup>3</sup>                                    |                                 |
| <i>Z</i>                                            | 1                                                             |                                 |
| Density (calculated)                                | 1.604 Mg·m <sup>-3</sup>                                      |                                 |
| Absorption coefficient                              | 2.882 mm <sup>-1</sup>                                        |                                 |
| F(000)                                              | 770 e                                                         |                                 |
| Crystal size                                        | 0.284 x 0.122 x 0.119 mm <sup>3</sup>                         |                                 |
| $\theta$ range for data collection                  | 1.620 to 30.032°.                                             |                                 |
| Index ranges                                        | -15 ≤ <i>h</i> ≤ 15, -16 ≤ <i>k</i> ≤ 16, -18 ≤ <i>l</i> ≤ 18 |                                 |
| Reflections collected                               | 45758                                                         |                                 |
| Independent reflections                             | 17115 [ <i>R</i> <sub>int</sub> = 0.0352]                     |                                 |
| Reflections with <i>I</i> > 2σ( <i>I</i> )          | 15711                                                         |                                 |
| Completeness to $\theta = 25.242^\circ$             | 99.9 %                                                        |                                 |
| Absorption correction                               | Gaussian                                                      |                                 |
| Max. and min. transmission                          | 0.81139 and 0.60986                                           |                                 |
| Refinement method                                   | Full-matrix least-squares on <i>F</i> <sup>2</sup>            |                                 |
| Data / restraints / parameters                      | 17115 / 148 / 1007                                            |                                 |
| Goodness-of-fit on <i>F</i> <sup>2</sup>            | 0.980                                                         |                                 |
| Final <i>R</i> indices [ <i>I</i> > 2σ( <i>I</i> )] | <i>R</i> <sub>1</sub> = 0.0371                                | <i>wR</i> <sup>2</sup> = 0.0777 |
| <i>R</i> indices (all data)                         | <i>R</i> <sub>1</sub> = 0.0437                                | <i>wR</i> <sup>2</sup> = 0.0806 |
| Absolute structure parameter                        | 0.003(3)                                                      |                                 |
| Extinction coefficient                              | n/a                                                           |                                 |
| Largest diff. peak and hole                         | 1.170 and -0.797 e·Å <sup>-3</sup>                            |                                 |



**Table S7:** Bond lengths [Å] and angles [°] of **13**.

---

|              |           |              |           |
|--------------|-----------|--------------|-----------|
| Bi(1)-Cl(1)  | 2.507(3)  | Bi(1)-O(1)   | 2.404(6)  |
| Bi(1)-C(1)   | 2.229(6)  | Bi(1)-C(10)  | 2.226(5)  |
| Bi(1)-C(19)  | 2.236(6)  | O(1)-N(1)    | 1.334(8)  |
| N(1)-C(28)   | 1.340(8)  | N(1)-C(32)   | 1.337(9)  |
| C(1)-C(2)    | 1.400(9)  | C(1)-C(6)    | 1.399(11) |
| C(2)-C(3)    | 1.384(11) | C(2)-C(7)    | 1.497(14) |
| C(3)-H(3)    | 0.9500    | C(3)-C(4)    | 1.386(13) |
| C(4)-C(5)    | 1.369(12) | C(4)-C(8)    | 1.512(12) |
| C(5)-H(5)    | 0.9500    | C(5)-C(6)    | 1.388(9)  |
| C(6)-C(9)    | 1.490(11) | C(7)-H(7A)   | 0.9800    |
| C(7)-H(7B)   | 0.9800    | C(7)-H(7C)   | 0.9800    |
| C(8)-H(8A)   | 0.9800    | C(8)-H(8B)   | 0.9800    |
| C(8)-H(8C)   | 0.9800    | C(9)-H(9A)   | 0.9800    |
| C(9)-H(9B)   | 0.9800    | C(9)-H(9C)   | 0.9800    |
| C(10)-C(11)  | 1.396(9)  | C(10)-C(15)  | 1.408(9)  |
| C(11)-C(12)  | 1.392(9)  | C(11)-C(16)  | 1.504(11) |
| C(12)-H(12)  | 0.9500    | C(12)-C(13)  | 1.403(10) |
| C(13)-C(14)  | 1.363(11) | C(13)-C(17)  | 1.512(9)  |
| C(14)-H(14)  | 0.9500    | C(14)-C(15)  | 1.381(10) |
| C(15)-C(18)  | 1.507(11) | C(16)-H(16A) | 0.9800    |
| C(16)-H(16B) | 0.9800    | C(16)-H(16C) | 0.9800    |
| C(17)-H(17A) | 0.9800    | C(17)-H(17B) | 0.9800    |
| C(17)-H(17C) | 0.9800    | C(18)-H(18A) | 0.9800    |
| C(18)-H(18B) | 0.9800    | C(18)-H(18C) | 0.9800    |
| C(19)-C(20)  | 1.404(8)  | C(19)-C(24)  | 1.396(9)  |
| C(20)-C(21)  | 1.386(10) | C(20)-C(25)  | 1.506(10) |
| C(21)-H(21)  | 0.9500    | C(21)-C(22)  | 1.377(11) |
| C(22)-C(23)  | 1.390(9)  | C(22)-C(26)  | 1.501(11) |
| C(23)-H(23)  | 0.9500    | C(23)-C(24)  | 1.388(10) |
| C(24)-C(27)  | 1.488(9)  | C(25)-H(25A) | 0.9800    |
| C(25)-H(25B) | 0.9800    | C(25)-H(25C) | 0.9800    |
| C(26)-H(26A) | 0.9800    | C(26)-H(26B) | 0.9800    |
| C(26)-H(26C) | 0.9800    | C(27)-H(27A) | 0.9800    |
| C(27)-H(27B) | 0.9800    | C(27)-H(27C) | 0.9800    |
| C(28)-H(28)  | 0.9500    | C(28)-C(29)  | 1.367(10) |
| C(29)-H(29)  | 0.9500    | C(29)-C(30)  | 1.376(11) |

|              |           |              |           |
|--------------|-----------|--------------|-----------|
| C(30)-H(30)  | 0.9500    | C(30)-C(31)  | 1.342(13) |
| C(31)-H(31)  | 0.9500    | C(31)-C(32)  | 1.386(13) |
| C(32)-H(32)  | 0.9500    | C(33)-C(34)  | 1.398(7)  |
| C(33)-C(38)  | 1.396(7)  | C(33)-B(1)   | 1.636(8)  |
| C(34)-H(34)  | 0.9500    | C(34)-C(35)  | 1.384(10) |
| C(35)-C(36)  | 1.379(10) | C(35)-C(39)  | 1.526(12) |
| C(36)-H(36)  | 0.9500    | C(36)-C(37)  | 1.375(9)  |
| C(37)-C(38)  | 1.384(8)  | C(37)-C(40)  | 1.490(9)  |
| C(38)-H(38)  | 0.9500    | C(39)-F(1A)  | 1.277(16) |
| C(39)-F(2A)  | 1.491(19) | C(39)-F(3A)  | 1.355(18) |
| C(39)-F(1B)  | 1.35(2)   | C(39)-F(2B)  | 1.10(2)   |
| C(39)-F(3B)  | 1.55(4)   | C(39)-F(1C)  | 1.48(3)   |
| C(39)-F(2C)  | 1.41(4)   | C(39)-F(3C)  | 1.11(2)   |
| C(40)-F(4A)  | 1.374(12) | C(40)-F(5A)  | 1.324(17) |
| C(40)-F(6A)  | 1.288(12) | C(40)-F(4B)  | 1.313(18) |
| C(40)-F(5B)  | 1.40(2)   | C(40)-F(6B)  | 1.42(2)   |
| C(40)-F(4C)  | 1.36(3)   | C(40)-F(5C)  | 1.20(2)   |
| C(40)-F(6C)  | 1.39(2)   | C(41)-C(42)  | 1.402(7)  |
| C(41)-C(46)  | 1.386(8)  | C(41)-B(1)   | 1.650(7)  |
| C(42)-H(42)  | 0.9500    | C(42)-C(43)  | 1.405(8)  |
| C(43)-C(44)  | 1.385(9)  | C(43)-C(47)  | 1.484(8)  |
| C(44)-H(44)  | 0.9500    | C(44)-C(45)  | 1.318(12) |
| C(45)-C(46)  | 1.411(10) | C(45)-C(48)  | 1.501(10) |
| C(46)-H(46)  | 0.9500    | C(47)-F(7A)  | 1.346(10) |
| C(47)-F(8A)  | 1.361(13) | C(47)-F(9A)  | 1.356(13) |
| C(47)-F(7B)  | 1.348(19) | C(47)-F(8B)  | 1.36(3)   |
| C(47)-F(9B)  | 1.28(3)   | C(47)-F(7C)  | 1.411(17) |
| C(47)-F(8C)  | 1.19(2)   | C(47)-F(9C)  | 1.31(2)   |
| C(48)-F(10A) | 1.238(13) | C(48)-F(11A) | 1.377(13) |
| C(48)-F(12A) | 1.309(10) | C(48)-F(10B) | 1.574(17) |
| C(48)-F(11B) | 1.22(2)   | C(48)-F(12B) | 1.459(15) |
| C(49)-C(50)  | 1.397(10) | C(49)-C(54)  | 1.400(9)  |
| C(49)-B(1)   | 1.635(7)  | C(50)-H(50)  | 0.9500    |
| C(50)-C(51)  | 1.402(10) | C(51)-C(52)  | 1.384(14) |
| C(51)-C(55)  | 1.497(10) | C(52)-H(52)  | 0.9500    |
| C(52)-C(53)  | 1.375(13) | C(53)-C(54)  | 1.397(8)  |
| C(53)-C(56)  | 1.472(11) | C(54)-H(54)  | 0.9500    |
| C(55)-F(13A) | 1.407(19) | C(55)-F(14A) | 1.468(17) |

|                   |           |                   |           |
|-------------------|-----------|-------------------|-----------|
| C(55)-F(15A)      | 1.336(11) | C(55)-F(13B)      | 1.21(2)   |
| C(55)-F(14B)      | 1.21(3)   | C(55)-F(15B)      | 1.42(3)   |
| C(55)-F(13C)      | 1.33(3)   | C(55)-F(14C)      | 1.16(3)   |
| C(55)-F(15C)      | 1.40(2)   | C(56)-F(16A)      | 1.138(13) |
| C(56)-F(17A)      | 1.556(16) | C(56)-F(18A)      | 1.324(10) |
| C(56)-F(16B)      | 1.524(16) | C(56)-F(17B)      | 1.314(12) |
| C(56)-F(18B)      | 1.222(17) | C(57)-C(58)       | 1.392(7)  |
| C(57)-C(62)       | 1.401(7)  | C(57)-B(1)        | 1.639(8)  |
| C(58)-H(58)       | 0.9500    | C(58)-C(59)       | 1.401(9)  |
| C(59)-C(60)       | 1.358(10) | C(59)-C(63A)      | 1.501(13) |
| C(59)-C(63B)      | 1.46(4)   | C(60)-H(60)       | 0.9500    |
| C(60)-C(61)       | 1.399(9)  | C(61)-C(62)       | 1.379(9)  |
| C(61)-C(64)       | 1.496(9)  | C(62)-H(62)       | 0.9500    |
| C(64)-F(22A)      | 1.381(18) | C(64)-F(23A)      | 1.300(13) |
| C(64)-F(24A)      | 1.287(17) | C(64)-F(22B)      | 1.336(17) |
| C(64)-F(23B)      | 1.355(17) | C(64)-F(24B)      | 1.406(18) |
| C(64)-F(22C)      | 1.34(2)   | C(64)-F(23C)      | 1.19(2)   |
| C(64)-F(24C)      | 1.31(2)   | F(19A)-C(63A)     | 1.240(14) |
| F(20A)-C(63A)     | 1.38(2)   | F(21A)-C(63A)     | 1.363(12) |
| F(19B)-C(63B)     | 1.32(2)   | F(20B)-C(63B)     | 1.32(2)   |
| F(21B)-C(63B)     | 1.35(2)   |                   |           |
|                   |           |                   |           |
| O(1)-Bi(1)-Cl(1)  | 173.5(2)  | C(1)-Bi(1)-Cl(1)  | 95.0(2)   |
| C(1)-Bi(1)-O(1)   | 79.7(2)   | C(1)-Bi(1)-C(19)  | 121.7(2)  |
| C(10)-Bi(1)-Cl(1) | 92.04(17) | C(10)-Bi(1)-O(1)  | 93.7(2)   |
| C(10)-Bi(1)-C(1)  | 117.9(2)  | C(10)-Bi(1)-C(19) | 119.3(2)  |
| C(19)-Bi(1)-Cl(1) | 93.3(2)   | C(19)-Bi(1)-O(1)  | 86.5(2)   |
| N(1)-O(1)-Bi(1)   | 136.7(4)  | O(1)-N(1)-C(28)   | 120.5(5)  |
| O(1)-N(1)-C(32)   | 119.2(6)  | C(32)-N(1)-C(28)  | 120.3(6)  |
| C(2)-C(1)-Bi(1)   | 117.7(5)  | C(6)-C(1)-Bi(1)   | 119.1(5)  |
| C(6)-C(1)-C(2)    | 123.2(6)  | C(1)-C(2)-C(7)    | 125.1(7)  |
| C(3)-C(2)-C(1)    | 116.5(8)  | C(3)-C(2)-C(7)    | 118.4(7)  |
| C(2)-C(3)-H(3)    | 118.4     | C(2)-C(3)-C(4)    | 123.2(7)  |
| C(4)-C(3)-H(3)    | 118.4     | C(3)-C(4)-C(8)    | 119.7(9)  |
| C(5)-C(4)-C(3)    | 117.2(6)  | C(5)-C(4)-C(8)    | 123.1(10) |
| C(4)-C(5)-H(5)    | 117.9     | C(4)-C(5)-C(6)    | 124.2(8)  |
| C(6)-C(5)-H(5)    | 117.9     | C(1)-C(6)-C(9)    | 126.2(6)  |
| C(5)-C(6)-C(1)    | 115.8(7)  | C(5)-C(6)-C(9)    | 118.0(7)  |

|                     |          |                     |          |
|---------------------|----------|---------------------|----------|
| C(2)-C(7)-H(7A)     | 109.5    | C(2)-C(7)-H(7B)     | 109.5    |
| C(2)-C(7)-H(7C)     | 109.5    | H(7A)-C(7)-H(7B)    | 109.5    |
| H(7A)-C(7)-H(7C)    | 109.5    | H(7B)-C(7)-H(7C)    | 109.5    |
| C(4)-C(8)-H(8A)     | 109.5    | C(4)-C(8)-H(8B)     | 109.5    |
| C(4)-C(8)-H(8C)     | 109.5    | H(8A)-C(8)-H(8B)    | 109.5    |
| H(8A)-C(8)-H(8C)    | 109.5    | H(8B)-C(8)-H(8C)    | 109.5    |
| C(6)-C(9)-H(9A)     | 109.5    | C(6)-C(9)-H(9B)     | 109.5    |
| C(6)-C(9)-H(9C)     | 109.5    | H(9A)-C(9)-H(9B)    | 109.5    |
| H(9A)-C(9)-H(9C)    | 109.5    | H(9B)-C(9)-H(9C)    | 109.5    |
| C(11)-C(10)-Bi(1)   | 117.7(4) | C(11)-C(10)-C(15)   | 122.0(6) |
| C(15)-C(10)-Bi(1)   | 120.1(5) | C(10)-C(11)-C(16)   | 125.7(6) |
| C(12)-C(11)-C(10)   | 117.4(6) | C(12)-C(11)-C(16)   | 116.9(6) |
| C(11)-C(12)-H(12)   | 119.1    | C(11)-C(12)-C(13)   | 121.8(6) |
| C(13)-C(12)-H(12)   | 119.1    | C(12)-C(13)-C(17)   | 118.9(7) |
| C(14)-C(13)-C(12)   | 118.4(5) | C(14)-C(13)-C(17)   | 122.7(7) |
| C(13)-C(14)-H(14)   | 118.5    | C(13)-C(14)-C(15)   | 122.9(6) |
| C(15)-C(14)-H(14)   | 118.5    | C(10)-C(15)-C(18)   | 123.8(6) |
| C(14)-C(15)-C(10)   | 117.5(6) | C(14)-C(15)-C(18)   | 118.7(6) |
| C(11)-C(16)-H(16A)  | 109.5    | C(11)-C(16)-H(16B)  | 109.5    |
| C(11)-C(16)-H(16C)  | 109.5    | H(16A)-C(16)-H(16B) | 109.5    |
| H(16A)-C(16)-H(16C) | 109.5    | H(16B)-C(16)-H(16C) | 109.5    |
| C(13)-C(17)-H(17A)  | 109.5    | C(13)-C(17)-H(17B)  | 109.5    |
| C(13)-C(17)-H(17C)  | 109.5    | H(17A)-C(17)-H(17B) | 109.5    |
| H(17A)-C(17)-H(17C) | 109.5    | H(17B)-C(17)-H(17C) | 109.5    |
| C(15)-C(18)-H(18A)  | 109.5    | C(15)-C(18)-H(18B)  | 109.5    |
| C(15)-C(18)-H(18C)  | 109.5    | H(18A)-C(18)-H(18B) | 109.5    |
| H(18A)-C(18)-H(18C) | 109.5    | H(18B)-C(18)-H(18C) | 109.5    |
| C(20)-C(19)-Bi(1)   | 117.8(4) | C(24)-C(19)-Bi(1)   | 119.1(4) |
| C(24)-C(19)-C(20)   | 123.0(6) | C(19)-C(20)-C(25)   | 126.0(7) |
| C(21)-C(20)-C(19)   | 116.5(6) | C(21)-C(20)-C(25)   | 117.6(6) |
| C(20)-C(21)-H(21)   | 118.4    | C(22)-C(21)-C(20)   | 123.2(6) |
| C(22)-C(21)-H(21)   | 118.4    | C(21)-C(22)-C(23)   | 117.6(6) |
| C(21)-C(22)-C(26)   | 121.3(6) | C(23)-C(22)-C(26)   | 121.1(7) |
| C(22)-C(23)-H(23)   | 118.5    | C(24)-C(23)-C(22)   | 122.9(6) |
| C(24)-C(23)-H(23)   | 118.5    | C(19)-C(24)-C(27)   | 126.0(6) |
| C(23)-C(24)-C(19)   | 116.6(6) | C(23)-C(24)-C(27)   | 117.4(6) |
| C(20)-C(25)-H(25A)  | 109.5    | C(20)-C(25)-H(25B)  | 109.5    |
| C(20)-C(25)-H(25C)  | 109.5    | H(25A)-C(25)-H(25B) | 109.5    |

|                     |           |                     |           |
|---------------------|-----------|---------------------|-----------|
| H(25A)-C(25)-H(25C) | 109.5     | H(25B)-C(25)-H(25C) | 109.5     |
| C(22)-C(26)-H(26A)  | 109.5     | C(22)-C(26)-H(26B)  | 109.5     |
| C(22)-C(26)-H(26C)  | 109.5     | H(26A)-C(26)-H(26B) | 109.5     |
| H(26A)-C(26)-H(26C) | 109.5     | H(26B)-C(26)-H(26C) | 109.5     |
| C(24)-C(27)-H(27A)  | 109.5     | C(24)-C(27)-H(27B)  | 109.5     |
| C(24)-C(27)-H(27C)  | 109.5     | H(27A)-C(27)-H(27B) | 109.5     |
| H(27A)-C(27)-H(27C) | 109.5     | H(27B)-C(27)-H(27C) | 109.5     |
| N(1)-C(28)-H(28)    | 119.7     | N(1)-C(28)-C(29)    | 120.6(6)  |
| C(29)-C(28)-H(28)   | 119.7     | C(28)-C(29)-H(29)   | 120.1     |
| C(28)-C(29)-C(30)   | 119.9(7)  | C(30)-C(29)-H(29)   | 120.1     |
| C(29)-C(30)-H(30)   | 120.6     | C(31)-C(30)-C(29)   | 118.7(7)  |
| C(31)-C(30)-H(30)   | 120.6     | C(30)-C(31)-H(31)   | 119.7     |
| C(30)-C(31)-C(32)   | 120.7(7)  | C(32)-C(31)-H(31)   | 119.7     |
| N(1)-C(32)-C(31)    | 119.8(7)  | N(1)-C(32)-H(32)    | 120.1     |
| C(31)-C(32)-H(32)   | 120.1     | C(34)-C(33)-B(1)    | 123.9(5)  |
| C(38)-C(33)-C(34)   | 114.8(5)  | C(38)-C(33)-B(1)    | 121.3(4)  |
| C(33)-C(34)-H(34)   | 118.9     | C(35)-C(34)-C(33)   | 122.1(6)  |
| C(35)-C(34)-H(34)   | 118.9     | C(34)-C(35)-C(39)   | 118.7(7)  |
| C(36)-C(35)-C(34)   | 121.5(6)  | C(36)-C(35)-C(39)   | 119.7(7)  |
| C(35)-C(36)-H(36)   | 121.1     | C(37)-C(36)-C(35)   | 117.7(6)  |
| C(37)-C(36)-H(36)   | 121.1     | C(36)-C(37)-C(38)   | 120.6(5)  |
| C(36)-C(37)-C(40)   | 120.2(5)  | C(38)-C(37)-C(40)   | 119.2(5)  |
| C(33)-C(38)-H(38)   | 118.4     | C(37)-C(38)-C(33)   | 123.2(5)  |
| C(37)-C(38)-H(38)   | 118.4     | C(35)-C(39)-F(3B)   | 102.8(15) |
| F(1A)-C(39)-C(35)   | 112.9(12) | F(1A)-C(39)-F(2A)   | 110.8(12) |
| F(1A)-C(39)-F(3A)   | 112.2(13) | F(2A)-C(39)-C(35)   | 106.4(9)  |
| F(3A)-C(39)-C(35)   | 112.8(9)  | F(3A)-C(39)-F(2A)   | 100.9(14) |
| F(1B)-C(39)-C(35)   | 112.4(12) | F(1B)-C(39)-F(3B)   | 115(2)    |
| F(2B)-C(39)-C(35)   | 121.8(16) | F(2B)-C(39)-F(1B)   | 105.9(17) |
| F(2B)-C(39)-F(3B)   | 99(2)     | F(1C)-C(39)-C(35)   | 103.4(14) |
| F(2C)-C(39)-C(35)   | 107.2(16) | F(2C)-C(39)-F(1C)   | 108(2)    |
| F(3C)-C(39)-C(35)   | 123.0(14) | F(3C)-C(39)-F(1C)   | 106.3(18) |
| F(3C)-C(39)-F(2C)   | 108(2)    | F(4A)-C(40)-C(37)   | 113.0(6)  |
| F(5A)-C(40)-C(37)   | 110.4(8)  | F(5A)-C(40)-F(4A)   | 101.4(10) |
| F(6A)-C(40)-C(37)   | 116.2(8)  | F(6A)-C(40)-F(4A)   | 106.0(9)  |
| F(6A)-C(40)-F(5A)   | 108.8(9)  | F(4B)-C(40)-C(37)   | 112.5(9)  |
| F(4B)-C(40)-F(5B)   | 109.6(14) | F(4B)-C(40)-F(6B)   | 106.9(14) |
| F(5B)-C(40)-C(37)   | 113.2(9)  | F(5B)-C(40)-F(6B)   | 106.8(13) |

|                     |           |                     |           |
|---------------------|-----------|---------------------|-----------|
| F(6B)-C(40)-C(37)   | 107.3(9)  | F(4C)-C(40)-C(37)   | 107.6(12) |
| F(4C)-C(40)-F(6C)   | 96.7(16)  | F(5C)-C(40)-C(37)   | 119.7(10) |
| F(5C)-C(40)-F(4C)   | 112.5(17) | F(5C)-C(40)-F(6C)   | 104.4(14) |
| F(6C)-C(40)-C(37)   | 113.5(10) | C(42)-C(41)-B(1)    | 123.1(4)  |
| C(46)-C(41)-C(42)   | 115.2(5)  | C(46)-C(41)-B(1)    | 121.6(5)  |
| C(41)-C(42)-H(42)   | 118.7     | C(41)-C(42)-C(43)   | 122.7(5)  |
| C(43)-C(42)-H(42)   | 118.7     | C(42)-C(43)-C(47)   | 118.5(5)  |
| C(44)-C(43)-C(42)   | 119.1(6)  | C(44)-C(43)-C(47)   | 122.3(6)  |
| C(43)-C(44)-H(44)   | 120.4     | C(45)-C(44)-C(43)   | 119.3(6)  |
| C(45)-C(44)-H(44)   | 120.4     | C(44)-C(45)-C(46)   | 122.5(6)  |
| C(44)-C(45)-C(48)   | 121.0(7)  | C(46)-C(45)-C(48)   | 116.5(7)  |
| C(41)-C(46)-C(45)   | 121.1(5)  | C(41)-C(46)-H(46)   | 119.4     |
| C(45)-C(46)-H(46)   | 119.4     | F(7A)-C(47)-C(43)   | 111.5(6)  |
| F(7A)-C(47)-F(8A)   | 106.3(9)  | F(7A)-C(47)-F(9A)   | 107.4(9)  |
| F(8A)-C(47)-C(43)   | 110.7(7)  | F(9A)-C(47)-C(43)   | 111.3(6)  |
| F(9A)-C(47)-F(8A)   | 109.5(9)  | F(7B)-C(47)-C(43)   | 115.5(9)  |
| F(7B)-C(47)-F(8B)   | 99.9(14)  | F(8B)-C(47)-C(43)   | 114.2(12) |
| F(9B)-C(47)-C(43)   | 116.6(12) | F(9B)-C(47)-F(7B)   | 107.8(15) |
| F(9B)-C(47)-F(8B)   | 100.7(16) | F(7C)-C(47)-C(43)   | 107.9(8)  |
| F(8C)-C(47)-C(43)   | 115.0(12) | F(8C)-C(47)-F(7C)   | 108.2(13) |
| F(8C)-C(47)-F(9C)   | 102.4(15) | F(9C)-C(47)-C(43)   | 114.7(10) |
| F(9C)-C(47)-F(7C)   | 108.2(13) | C(45)-C(48)-F(10B)  | 107.4(8)  |
| F(10A)-C(48)-C(45)  | 115.3(9)  | F(10A)-C(48)-F(11A) | 110.4(9)  |
| F(10A)-C(48)-F(12A) | 90.4(8)   | F(11A)-C(48)-C(45)  | 110.7(7)  |
| F(12A)-C(48)-C(45)  | 114.6(8)  | F(12A)-C(48)-F(11A) | 114.1(8)  |
| F(11B)-C(48)-C(45)  | 124.2(11) | F(11B)-C(48)-F(10B) | 83.6(11)  |
| F(11B)-C(48)-F(12B) | 100.5(12) | F(12B)-C(48)-C(45)  | 107.6(8)  |
| F(12B)-C(48)-F(10B) | 133.7(9)  | C(50)-C(49)-C(54)   | 115.0(5)  |
| C(50)-C(49)-B(1)    | 121.7(6)  | C(54)-C(49)-B(1)    | 123.2(5)  |
| C(49)-C(50)-H(50)   | 118.6     | C(49)-C(50)-C(51)   | 122.7(7)  |
| C(51)-C(50)-H(50)   | 118.6     | C(50)-C(51)-C(55)   | 118.8(7)  |
| C(52)-C(51)-C(50)   | 120.3(7)  | C(52)-C(51)-C(55)   | 120.9(7)  |
| C(51)-C(52)-H(52)   | 120.7     | C(53)-C(52)-C(51)   | 118.6(7)  |
| C(53)-C(52)-H(52)   | 120.7     | C(52)-C(53)-C(54)   | 120.6(7)  |
| C(52)-C(53)-C(56)   | 120.9(7)  | C(54)-C(53)-C(56)   | 118.5(7)  |
| C(49)-C(54)-H(54)   | 118.6     | C(53)-C(54)-C(49)   | 122.8(6)  |
| C(53)-C(54)-H(54)   | 118.6     | F(13A)-C(55)-C(51)  | 111.5(8)  |
| F(13A)-C(55)-F(14A) | 106.8(13) | F(14A)-C(55)-C(51)  | 106.3(8)  |

|                      |           |                      |           |
|----------------------|-----------|----------------------|-----------|
| F(15A)-C(55)-C(51)   | 113.2(8)  | F(15A)-C(55)-F(13A)  | 109.9(11) |
| F(15A)-C(55)-F(14A)  | 108.9(11) | F(13B)-C(55)-C(51)   | 118.1(11) |
| F(13B)-C(55)-F(14B)  | 97.7(17)  | F(13B)-C(55)-F(15B)  | 97.9(16)  |
| F(14B)-C(55)-C(51)   | 113.7(16) | F(14B)-C(55)-F(15B)  | 114.6(15) |
| F(15B)-C(55)-C(51)   | 113.1(12) | F(13C)-C(55)-C(51)   | 109.4(12) |
| F(13C)-C(55)-F(15C)  | 111.0(15) | F(14C)-C(55)-C(51)   | 124.6(14) |
| F(14C)-C(55)-F(13C)  | 101.9(17) | F(14C)-C(55)-F(15C)  | 98.9(16)  |
| F(15C)-C(55)-C(51)   | 110.3(12) | C(53)-C(56)-F(17A)   | 107.1(9)  |
| C(53)-C(56)-F(16B)   | 107.7(8)  | F(16A)-C(56)-C(53)   | 121.9(9)  |
| F(16A)-C(56)-F(17A)  | 96.9(9)   | F(16A)-C(56)-F(18A)  | 115.4(11) |
| F(18A)-C(56)-C(53)   | 116.3(6)  | F(18A)-C(56)-F(17A)  | 90.8(8)   |
| F(17B)-C(56)-C(53)   | 113.7(8)  | F(17B)-C(56)-F(16B)  | 95.4(8)   |
| F(18B)-C(56)-C(53)   | 112.6(10) | F(18B)-C(56)-F(16B)  | 112.8(11) |
| F(18B)-C(56)-F(17B)  | 113.4(11) | C(58)-C(57)-C(62)    | 115.2(5)  |
| C(58)-C(57)-B(1)     | 122.5(4)  | C(62)-C(57)-B(1)     | 122.0(5)  |
| C(57)-C(58)-H(58)    | 118.8     | C(57)-C(58)-C(59)    | 122.3(5)  |
| C(59)-C(58)-H(58)    | 118.8     | C(58)-C(59)-C(63A)   | 118.6(6)  |
| C(58)-C(59)-C(63B)   | 117.6(9)  | C(60)-C(59)-C(58)    | 121.3(6)  |
| C(60)-C(59)-C(63A)   | 120.1(6)  | C(60)-C(59)-C(63B)   | 120.8(9)  |
| C(59)-C(60)-H(60)    | 121.1     | C(59)-C(60)-C(61)    | 117.7(6)  |
| C(61)-C(60)-H(60)    | 121.1     | C(60)-C(61)-C(64)    | 118.1(6)  |
| C(62)-C(61)-C(60)    | 120.9(5)  | C(62)-C(61)-C(64)    | 121.0(6)  |
| C(57)-C(62)-H(62)    | 118.7     | C(61)-C(62)-C(57)    | 122.6(5)  |
| C(61)-C(62)-H(62)    | 118.7     | F(22A)-C(64)-C(61)   | 110.1(9)  |
| F(23A)-C(64)-C(61)   | 114.1(8)  | F(23A)-C(64)-F(22A)  | 103.1(12) |
| F(24A)-C(64)-C(61)   | 116.0(9)  | F(24A)-C(64)-F(22A)  | 107.6(13) |
| F(24A)-C(64)-F(23A)  | 105.0(11) | F(22B)-C(64)-C(61)   | 113.9(8)  |
| F(22B)-C(64)-F(23B)  | 108.6(12) | F(22B)-C(64)-F(24B)  | 106.5(13) |
| F(23B)-C(64)-C(61)   | 113.5(9)  | F(23B)-C(64)-F(24B)  | 104.8(12) |
| F(24B)-C(64)-C(61)   | 109.0(9)  | F(22C)-C(64)-C(61)   | 113.9(9)  |
| F(23C)-C(64)-C(61)   | 114.6(13) | F(23C)-C(64)-F(22C)  | 114.9(17) |
| F(23C)-C(64)-F(24C)  | 99.6(19)  | F(24C)-C(64)-C(61)   | 108.9(13) |
| F(24C)-C(64)-F(22C)  | 103.0(17) | C(33)-B(1)-C(41)     | 109.1(4)  |
| C(33)-B(1)-C(57)     | 110.3(4)  | C(49)-B(1)-C(33)     | 110.4(4)  |
| C(49)-B(1)-C(41)     | 109.5(4)  | C(49)-B(1)-C(57)     | 107.5(4)  |
| C(57)-B(1)-C(41)     | 110.1(4)  | F(19A)-C(63A)-C(59)  | 117.2(11) |
| F(19A)-C(63A)-F(20A) | 101.4(10) | F(19A)-C(63A)-F(21A) | 110.4(12) |
| F(20A)-C(63A)-C(59)  | 110.7(11) | F(21A)-C(63A)-C(59)  | 112.2(8)  |

|                      |           |                      |        |
|----------------------|-----------|----------------------|--------|
| F(21A)-C(63A)-F(20A) | 103.5(11) | F(19B)-C(63B)-C(59)  | 115(2) |
| F(19B)-C(63B)-F(21B) | 112(2)    | F(20B)-C(63B)-C(59)  | 115(2) |
| F(20B)-C(63B)-F(19B) | 99(2)     | F(20B)-C(63B)-F(21B) | 102(2) |
| F(21B)-C(63B)-C(59)  | 111.7(19) |                      |        |

---



**NOTE:** The following X-ray data of structure **7**, **8**, **9a** and **11** presented here has been previously communicated in the thesis<sup>4</sup>. These structures were already uploaded at the CCDC prior to this communication.

#### 9.4 Single crystal structure analysis of tris(3,5-di-*t*-butylphenyl)bismuth dichloride (**7**)

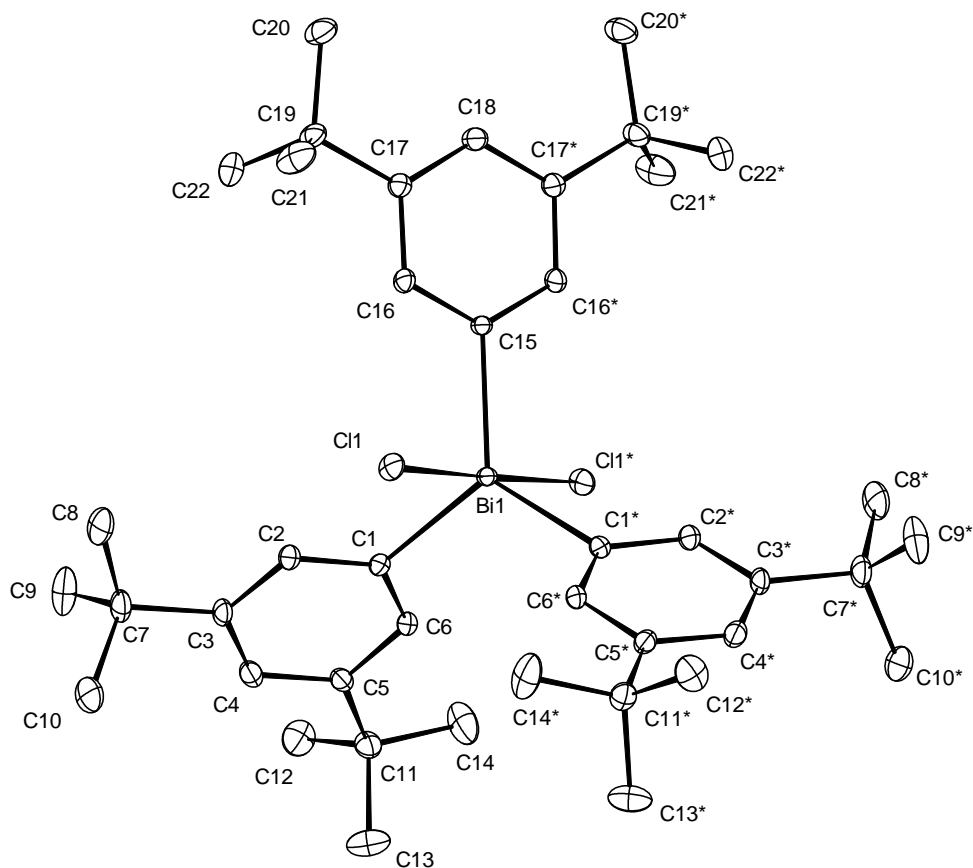

**Figure S20:** The solid state structure of **7**. H atoms have been removed for clarity.

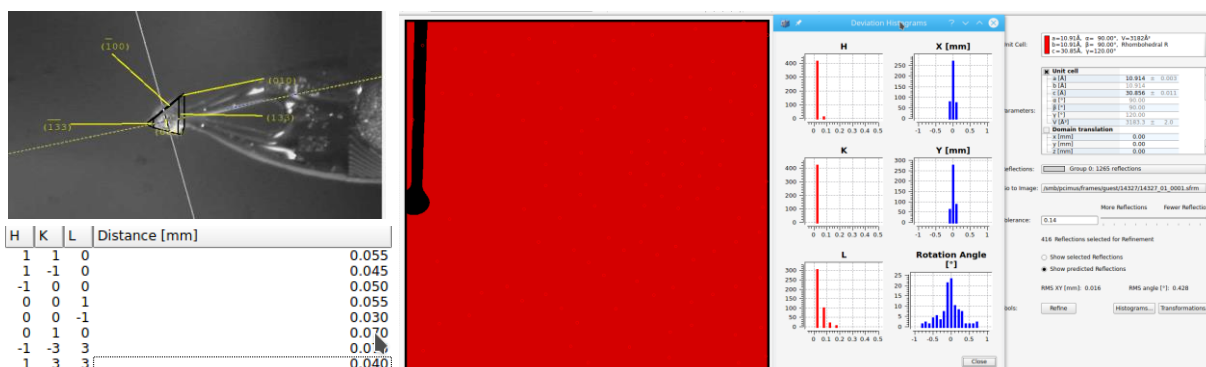

**Figure S21:** Crystal faces and unit cell determination/refinement of **7**.

INTENSITY STATISTICS FOR DATASET # 1 14327sadabs.raw

| Resolution  | #Data | #Theory | %Complete | Redundancy | Mean I | Mean I/s | Rmerge | Rsigma |
|-------------|-------|---------|-----------|------------|--------|----------|--------|--------|
| Inf - 2.41  | 120   | 121     | 99.2      | 49.07      | 120.43 | 159.17   | 0.0484 | 0.0063 |
| 2.41 - 1.53 | 285   | 286     | 99.7      | 67.24      | 81.79  | 172.09   | 0.0422 | 0.0047 |
| 1.53 - 1.19 | 399   | 399     | 100.0     | 72.58      | 50.87  | 151.72   | 0.0402 | 0.0046 |
| 1.19 - 1.03 | 413   | 414     | 99.8      | 63.39      | 40.33  | 130.54   | 0.0455 | 0.0052 |
| 1.03 - 0.93 | 398   | 398     | 100.0     | 50.34      | 30.34  | 102.80   | 0.0468 | 0.0063 |
| 0.93 - 0.86 | 408   | 408     | 100.0     | 44.07      | 25.27  | 88.11    | 0.0470 | 0.0072 |
| 0.86 - 0.81 | 370   | 370     | 100.0     | 41.02      | 22.12  | 81.30    | 0.0523 | 0.0081 |
| 0.81 - 0.76 | 479   | 479     | 100.0     | 38.92      | 19.81  | 74.25    | 0.0549 | 0.0089 |
| 0.76 - 0.73 | 343   | 343     | 100.0     | 37.41      | 17.22  | 67.69    | 0.0665 | 0.0099 |
| 0.73 - 0.70 | 425   | 425     | 100.0     | 34.99      | 14.83  | 61.94    | 0.0663 | 0.0114 |
| 0.70 - 0.67 | 463   | 463     | 100.0     | 34.04      | 12.80  | 54.71    | 0.0773 | 0.0129 |
| 0.67 - 0.65 | 392   | 392     | 100.0     | 31.80      | 12.08  | 50.82    | 0.0761 | 0.0143 |
| 0.65 - 0.63 | 415   | 415     | 100.0     | 31.34      | 10.62  | 45.97    | 0.0836 | 0.0160 |
| 0.63 - 0.61 | 486   | 486     | 100.0     | 29.04      | 10.47  | 43.93    | 0.0883 | 0.0173 |
| 0.61 - 0.60 | 249   | 249     | 100.0     | 28.00      | 9.09   | 37.85    | 0.0988 | 0.0203 |
| 0.60 - 0.58 | 586   | 586     | 100.0     | 17.27      | 8.57   | 27.78    | 0.1030 | 0.0289 |
| 0.58 - 0.57 | 314   | 314     | 100.0     | 13.72      | 7.10   | 20.65    | 0.1143 | 0.0387 |
| 0.57 - 0.56 | 349   | 349     | 100.0     | 13.26      | 7.00   | 20.40    | 0.1188 | 0.0401 |
| 0.56 - 0.55 | 360   | 360     | 100.0     | 13.02      | 6.52   | 18.96    | 0.1288 | 0.0439 |
| 0.55 - 0.54 | 388   | 388     | 100.0     | 12.27      | 5.93   | 16.68    | 0.1363 | 0.0497 |
| 0.54 - 0.53 | 313   | 397     | 78.8      | 4.38       | 5.35   | 8.57     | 0.1592 | 0.1193 |
| -----       |       |         |           |            |        |          |        |        |
| 0.63 - 0.53 | 3045  | 3129    | 97.3      | 16.40      | 7.67   | 25.17    | 0.1044 | 0.0377 |
| Inf - 0.53  | 7955  | 8042    | 98.9      | 33.88      | 20.80  | 64.82    | 0.0515 | 0.0115 |

Complete .cif-data of the compound are available under the CCDC number **CCDC-2289340**.

**Table S8. Crystal data and structure refinement.**

|                                   |                                                   |                          |
|-----------------------------------|---------------------------------------------------|--------------------------|
| Identification code               | 14327sadabs                                       |                          |
| Empirical formula                 | C <sub>42</sub> H <sub>63</sub> BiCl <sub>2</sub> |                          |
| Color                             | colourless                                        |                          |
| Formula weight                    | 847.80 g·mol <sup>-1</sup>                        |                          |
| Temperature                       | 100(2) K                                          |                          |
| Wavelength                        | 0.71073 Å                                         |                          |
| Crystal system                    | Trigonal                                          |                          |
| Space group                       | P 3 <sub>1</sub> 2 1, (no. 152)                   |                          |
| Unit cell dimensions              | a = 10.7948(4) Å                                  | α = 90°.                 |
|                                   | b = 10.7948(4) Å                                  | β = 90°.                 |
|                                   | c = 30.6951(19) Å                                 | γ = 120°.                |
| Volume                            | 3097.6(3) Å <sup>3</sup>                          |                          |
| Z                                 | 3                                                 |                          |
| Density (calculated)              | 1.363 Mg·m <sup>-3</sup>                          |                          |
| Absorption coefficient            | 4.424 mm <sup>-1</sup>                            |                          |
| F(000)                            | 1296 e                                            |                          |
| Crystal size                      | 0.172 x 0.118 x 0.10 mm <sup>3</sup>              |                          |
| θ range for data collection       | 1.990 to 38.567°.                                 |                          |
| Index ranges                      | -18 ≤ h ≤ 18, -18 ≤ k ≤ 18, -53 ≤ l ≤ 53          |                          |
| Reflections collected             | 256310                                            |                          |
| Independent reflections           | 11669 [R <sub>int</sub> = 0.0338]                 |                          |
| Reflections with I > 2σ(I)        | 11488                                             |                          |
| Completeness to θ = 25.242°       | 100.0 %                                           |                          |
| Absorption correction             | Gaussian                                          |                          |
| Max. and min. transmission        | 0.73065 and 0.60834                               |                          |
| Refinement method                 | Full-matrix least-squares on F <sup>2</sup>       |                          |
| Data / restraints / parameters    | 11669 / 0 / 215                                   |                          |
| Goodness-of-fit on F <sup>2</sup> | 1.006                                             |                          |
| Final R indices [I > 2σ(I)]       | R <sub>1</sub> = 0.0241                           | wR <sup>2</sup> = 0.0475 |
| R indices (all data)              | R <sub>1</sub> = 0.0248                           | wR <sup>2</sup> = 0.0478 |
| Absolute structure parameter      | 0.045(5)                                          |                          |
| Extinction coefficient            | n/a                                               |                          |
| Largest diff. peak and hole       | 1.913 and -1.628 e·Å <sup>-3</sup>                |                          |

**Table S9. Bond lengths [Å] and angles [°].**

|                      |            |                    |            |
|----------------------|------------|--------------------|------------|
| Bi(1)-Cl(1)          | 2.5954(5)  | Bi(1)-Cl(1)#1      | 2.5953(5)  |
| Bi(1)-C(1)#1         | 2.221(2)   | Bi(1)-C(1)         | 2.221(2)   |
| Bi(1)-C(15)          | 2.212(3)   | C(1)-C(2)          | 1.383(3)   |
| C(1)-C(6)            | 1.384(3)   | C(2)-H(2)          | 0.9500     |
| C(2)-C(3)            | 1.398(3)   | C(3)-C(4)          | 1.397(4)   |
| C(3)-C(7)            | 1.530(3)   | C(4)-H(4)          | 0.9500     |
| C(4)-C(5)            | 1.397(3)   | C(5)-C(6)          | 1.397(3)   |
| C(5)-C(11)           | 1.528(3)   | C(6)-H(6)          | 0.9500     |
| C(7)-C(8)            | 1.525(4)   | C(7)-C(9)          | 1.538(4)   |
| C(7)-C(10)           | 1.531(4)   | C(8)-H(8A)         | 0.9800     |
| C(8)-H(8B)           | 0.9800     | C(8)-H(8C)         | 0.9800     |
| C(9)-H(9A)           | 0.9800     | C(9)-H(9B)         | 0.9800     |
| C(9)-H(9C)           | 0.9800     | C(10)-H(10A)       | 0.9800     |
| C(10)-H(10B)         | 0.9800     | C(10)-H(10C)       | 0.9800     |
| C(11)-C(12)          | 1.535(4)   | C(11)-C(13)        | 1.528(4)   |
| C(11)-C(14)          | 1.529(4)   | C(12)-H(12A)       | 0.9800     |
| C(12)-H(12B)         | 0.9800     | C(12)-H(12C)       | 0.9800     |
| C(13)-H(13A)         | 0.9800     | C(13)-H(13B)       | 0.9800     |
| C(13)-H(13C)         | 0.9800     | C(14)-H(14A)       | 0.9800     |
| C(14)-H(14B)         | 0.9800     | C(14)-H(14C)       | 0.9800     |
| C(15)-C(16)          | 1.382(3)   | C(15)-C(16)#1      | 1.382(3)   |
| C(16)-H(16)          | 0.9500     | C(16)-C(17)        | 1.396(3)   |
| C(17)-C(18)          | 1.401(3)   | C(17)-C(19)        | 1.531(3)   |
| C(18)-H(18)          | 0.9500     | C(19)-C(20)        | 1.532(4)   |
| C(19)-C(21)          | 1.541(4)   | C(19)-C(22)        | 1.537(4)   |
| C(20)-H(20A)         | 0.9800     | C(20)-H(20B)       | 0.9800     |
| C(20)-H(20C)         | 0.9800     | C(21)-H(21A)       | 0.9800     |
| C(21)-H(21B)         | 0.9800     | C(21)-H(21C)       | 0.9800     |
| C(22)-H(22A)         | 0.9800     | C(22)-H(22B)       | 0.9800     |
| C(22)-H(22C)         | 0.9800     |                    |            |
| Cl(1)#1-Bi(1)-Cl(1)  | 178.59(3)  | C(1)-Bi(1)-Cl(1)   | 89.96(6)   |
| C(1)#1-Bi(1)-Cl(1)#1 | 89.96(6)   | C(1)#1-Bi(1)-Cl(1) | 90.78(6)   |
| C(1)-Bi(1)-Cl(1)#1   | 90.78(6)   | C(1)#1-Bi(1)-C(1)  | 116.83(12) |
| C(15)-Bi(1)-Cl(1)#1  | 89.293(15) | C(15)-Bi(1)-Cl(1)  | 89.293(14) |
| C(15)-Bi(1)-C(1)     | 121.59(6)  | C(15)-Bi(1)-C(1)#1 | 121.58(6)  |

|                     |            |                     |            |
|---------------------|------------|---------------------|------------|
| C(2)-C(1)-Bi(1)     | 119.89(16) | C(2)-C(1)-C(6)      | 123.1(2)   |
| C(6)-C(1)-Bi(1)     | 116.94(16) | C(1)-C(2)-H(2)      | 120.5      |
| C(1)-C(2)-C(3)      | 119.0(2)   | C(3)-C(2)-H(2)      | 120.5      |
| C(2)-C(3)-C(7)      | 122.5(2)   | C(4)-C(3)-C(2)      | 117.7(2)   |
| C(4)-C(3)-C(7)      | 119.8(2)   | C(3)-C(4)-H(4)      | 118.3      |
| C(3)-C(4)-C(5)      | 123.4(2)   | C(5)-C(4)-H(4)      | 118.3      |
| C(4)-C(5)-C(11)     | 121.0(2)   | C(6)-C(5)-C(4)      | 117.8(2)   |
| C(6)-C(5)-C(11)     | 121.1(2)   | C(1)-C(6)-C(5)      | 118.9(2)   |
| C(1)-C(6)-H(6)      | 120.5      | C(5)-C(6)-H(6)      | 120.5      |
| C(3)-C(7)-C(9)      | 109.1(2)   | C(3)-C(7)-C(10)     | 110.0(2)   |
| C(8)-C(7)-C(3)      | 112.4(2)   | C(8)-C(7)-C(9)      | 107.9(3)   |
| C(8)-C(7)-C(10)     | 108.4(3)   | C(10)-C(7)-C(9)     | 108.9(3)   |
| C(7)-C(8)-H(8A)     | 109.5      | C(7)-C(8)-H(8B)     | 109.5      |
| C(7)-C(8)-H(8C)     | 109.5      | H(8A)-C(8)-H(8B)    | 109.5      |
| H(8A)-C(8)-H(8C)    | 109.5      | H(8B)-C(8)-H(8C)    | 109.5      |
| C(7)-C(9)-H(9A)     | 109.5      | C(7)-C(9)-H(9B)     | 109.5      |
| C(7)-C(9)-H(9C)     | 109.5      | H(9A)-C(9)-H(9B)    | 109.5      |
| H(9A)-C(9)-H(9C)    | 109.5      | H(9B)-C(9)-H(9C)    | 109.5      |
| C(7)-C(10)-H(10A)   | 109.5      | C(7)-C(10)-H(10B)   | 109.5      |
| C(7)-C(10)-H(10C)   | 109.5      | H(10A)-C(10)-H(10B) | 109.5      |
| H(10A)-C(10)-H(10C) | 109.5      | H(10B)-C(10)-H(10C) | 109.5      |
| C(5)-C(11)-C(12)    | 110.7(2)   | C(5)-C(11)-C(14)    | 112.1(2)   |
| C(13)-C(11)-C(5)    | 108.8(2)   | C(13)-C(11)-C(12)   | 109.0(2)   |
| C(13)-C(11)-C(14)   | 108.7(3)   | C(14)-C(11)-C(12)   | 107.5(2)   |
| C(11)-C(12)-H(12A)  | 109.5      | C(11)-C(12)-H(12B)  | 109.5      |
| C(11)-C(12)-H(12C)  | 109.5      | H(12A)-C(12)-H(12B) | 109.5      |
| H(12A)-C(12)-H(12C) | 109.5      | H(12B)-C(12)-H(12C) | 109.5      |
| C(11)-C(13)-H(13A)  | 109.5      | C(11)-C(13)-H(13B)  | 109.5      |
| C(11)-C(13)-H(13C)  | 109.5      | H(13A)-C(13)-H(13B) | 109.5      |
| H(13A)-C(13)-H(13C) | 109.5      | H(13B)-C(13)-H(13C) | 109.5      |
| C(11)-C(14)-H(14A)  | 109.5      | C(11)-C(14)-H(14B)  | 109.5      |
| C(11)-C(14)-H(14C)  | 109.5      | H(14A)-C(14)-H(14B) | 109.5      |
| H(14A)-C(14)-H(14C) | 109.5      | H(14B)-C(14)-H(14C) | 109.5      |
| C(16)#1-C(15)-Bi(1) | 118.38(14) | C(16)-C(15)-Bi(1)   | 118.38(14) |
| C(16)#1-C(15)-C(16) | 123.2(3)   | C(15)-C(16)-H(16)   | 120.5      |
| C(15)-C(16)-C(17)   | 118.9(2)   | C(17)-C(16)-H(16)   | 120.5      |
| C(16)-C(17)-C(18)   | 118.2(2)   | C(16)-C(17)-C(19)   | 119.1(2)   |
| C(18)-C(17)-C(19)   | 122.8(2)   | C(17)#1-C(18)-C(17) | 122.6(3)   |

|                     |          |                     |          |
|---------------------|----------|---------------------|----------|
| C(17)-C(18)-H(18)   | 118.7    | C(17)#1-C(18)-H(18) | 118.7    |
| C(17)-C(19)-C(20)   | 112.1(2) | C(17)-C(19)-C(21)   | 109.3(2) |
| C(17)-C(19)-C(22)   | 108.7(2) | C(20)-C(19)-C(21)   | 108.2(2) |
| C(20)-C(19)-C(22)   | 108.8(2) | C(22)-C(19)-C(21)   | 109.8(2) |
| C(19)-C(20)-H(20A)  | 109.5    | C(19)-C(20)-H(20B)  | 109.5    |
| C(19)-C(20)-H(20C)  | 109.5    | H(20A)-C(20)-H(20B) | 109.5    |
| H(20A)-C(20)-H(20C) | 109.5    | H(20B)-C(20)-H(20C) | 109.5    |
| C(19)-C(21)-H(21A)  | 109.5    | C(19)-C(21)-H(21B)  | 109.5    |
| C(19)-C(21)-H(21C)  | 109.5    | H(21A)-C(21)-H(21B) | 109.5    |
| H(21A)-C(21)-H(21C) | 109.5    | H(21B)-C(21)-H(21C) | 109.5    |
| C(19)-C(22)-H(22A)  | 109.5    | C(19)-C(22)-H(22B)  | 109.5    |
| C(19)-C(22)-H(22C)  | 109.5    | H(22A)-C(22)-H(22B) | 109.5    |
| H(22A)-C(22)-H(22C) | 109.5    | H(22B)-C(22)-H(22C) | 109.5    |

---

Symmetry transformations used to generate equivalent atoms:

#1  $x-y+1, -y+2, -z+2/3$

9.5 Single crystal structure analysis of tris(2,4,6-trimethylphenyl)- $\lambda^5$ -bismuth dichloride (**8**)

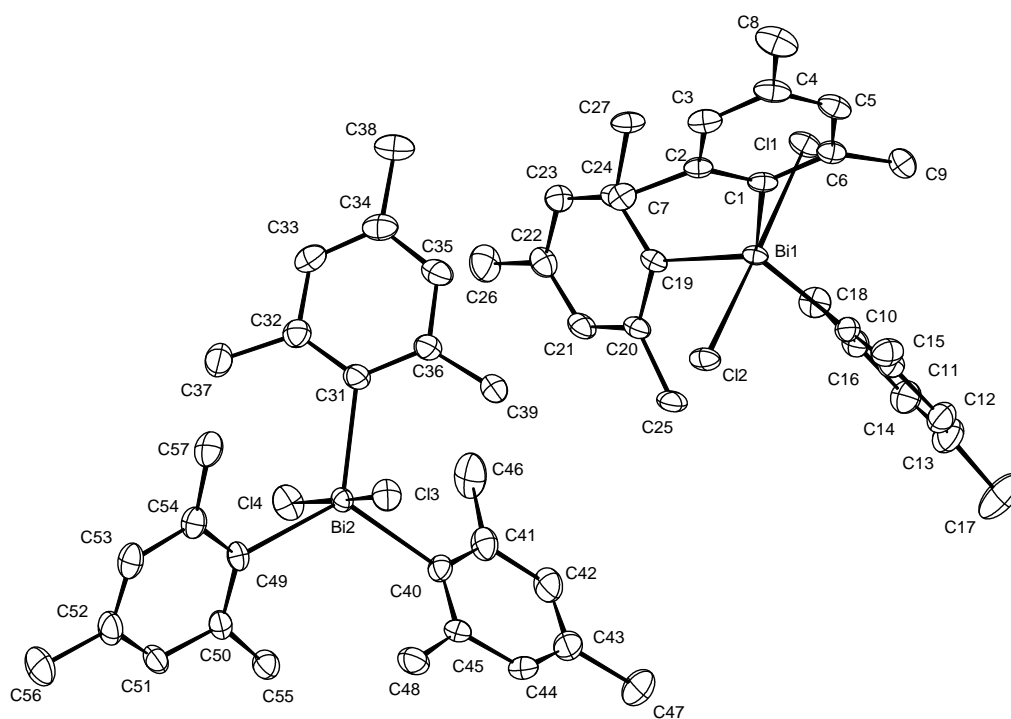

**Figure S22:** The solid state structure of **8**. H atoms have been removed for clarity.

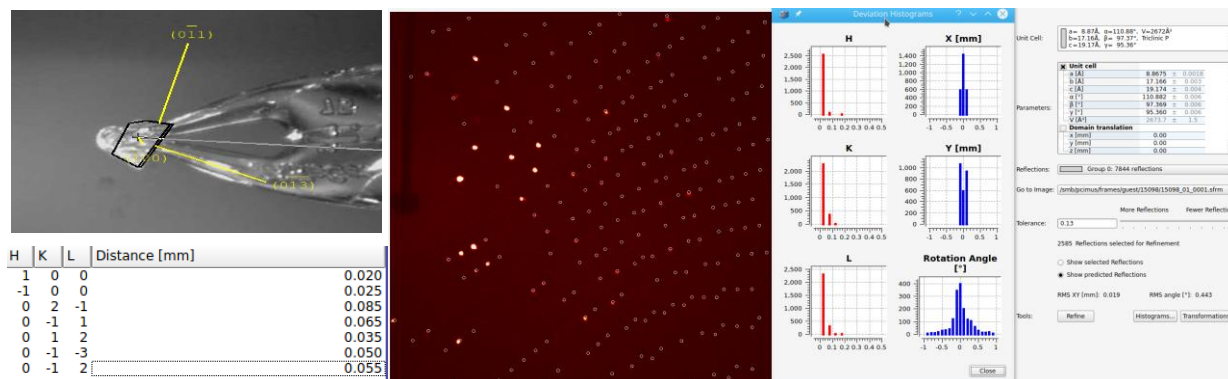

**Figure S23:** Crystal faces and unit cell determination/refinement of **8**.

INTENSITY STATISTICS FOR DATASET # 1 15098sadabs.raw

| Resolution  | #Data | #Theory | %Complete | Redundancy | Mean I | Mean I/s | Rmerge | Rsigma |
|-------------|-------|---------|-----------|------------|--------|----------|--------|--------|
| Inf - 2.47  | 356   | 357     | 99.7      | 8.68       | 130.57 | 44.48    | 0.0363 | 0.0208 |
| 2.47 - 1.65 | 848   | 848     | 100.0     | 8.94       | 91.06  | 41.96    | 0.0342 | 0.0209 |
| 1.65 - 1.31 | 1184  | 1184    | 100.0     | 8.92       | 60.26  | 38.84    | 0.0357 | 0.0214 |
| 1.31 - 1.15 | 1146  | 1146    | 100.0     | 8.64       | 44.02  | 34.93    | 0.0396 | 0.0226 |
| 1.15 - 1.04 | 1247  | 1247    | 100.0     | 7.08       | 37.16  | 30.13    | 0.0466 | 0.0269 |
| 1.04 - 0.96 | 1288  | 1288    | 100.0     | 5.16       | 28.03  | 22.16    | 0.0537 | 0.0347 |
| 0.96 - 0.91 | 1072  | 1072    | 100.0     | 4.35       | 23.18  | 18.74    | 0.0617 | 0.0406 |
| 0.91 - 0.86 | 1297  | 1297    | 100.0     | 3.89       | 20.33  | 16.39    | 0.0679 | 0.0456 |
| 0.86 - 0.82 | 1316  | 1316    | 100.0     | 3.69       | 17.83  | 14.49    | 0.0744 | 0.0525 |
| 0.82 - 0.79 | 1118  | 1118    | 100.0     | 3.53       | 16.02  | 13.36    | 0.0751 | 0.0579 |
| 0.79 - 0.77 | 909   | 909     | 100.0     | 3.39       | 14.32  | 12.40    | 0.0866 | 0.0649 |
| 0.77 - 0.74 | 1473  | 1475    | 99.9      | 3.35       | 12.38  | 11.37    | 0.0908 | 0.0731 |
| 0.74 - 0.72 | 1142  | 1143    | 99.9      | 3.17       | 10.95  | 10.22    | 0.1007 | 0.0863 |
| 0.72 - 0.70 | 1266  | 1266    | 100.0     | 3.04       | 9.90   | 9.29     | 0.1070 | 0.0967 |
| 0.70 - 0.68 | 1388  | 1401    | 99.1      | 2.97       | 8.73   | 8.59     | 0.1142 | 0.1071 |
| 0.68 - 0.67 | 783   | 791     | 99.0      | 2.91       | 8.65   | 8.34     | 0.1155 | 0.1164 |
| 0.67 - 0.65 | 1689  | 1712    | 98.7      | 2.76       | 7.05   | 6.87     | 0.1392 | 0.1449 |
| 0.65 - 0.64 | 918   | 932     | 98.5      | 2.73       | 6.98   | 6.86     | 0.1470 | 0.1384 |
| 0.64 - 0.63 | 973   | 988     | 98.5      | 2.63       | 6.39   | 6.20     | 0.1583 | 0.1668 |
| 0.63 - 0.62 | 1040  | 1066    | 97.6      | 2.58       | 5.77   | 5.69     | 0.1723 | 0.1810 |
| 0.62 - 0.61 | 1073  | 1374    | 78.1      | 1.77       | 5.28   | 4.89     | 0.1872 | 0.2171 |
| -----       |       |         |           |            |        |          |        |        |
| 0.71 - 0.61 | 8510  | 8910    | 95.5      | 2.64       | 7.22   | 6.98     | 0.1360 | 0.1410 |
| Inf - 0.61  | 23526 | 23930   | 98.3      | 4.27       | 22.61  | 16.32    | 0.0491 | 0.0465 |

Complete .cif-data of the compound are available under the CCDC number **CCDC-2296787**.



**Table S10. Crystal data and structure refinement.**

|                                         |                                                                                        |                                                                                        |
|-----------------------------------------|----------------------------------------------------------------------------------------|----------------------------------------------------------------------------------------|
| Identification code                     | 15098                                                                                  |                                                                                        |
| Empirical formula                       | $C_{27}H_{33}BiCl_2$                                                                   |                                                                                        |
| Color                                   | colourless                                                                             |                                                                                        |
| Formula weight                          | $637.41 \text{ g}\cdot\text{mol}^{-1}$                                                 |                                                                                        |
| Temperature                             | 100(2) K                                                                               |                                                                                        |
| Wavelength                              | 0.71073 Å                                                                              |                                                                                        |
| Crystal system                          | Triclinic                                                                              |                                                                                        |
| Space group                             | $P-1$ , (no. 2)                                                                        |                                                                                        |
| Unit cell dimensions                    | $a = 8.7522(10) \text{ Å}$<br>$b = 16.9260(19) \text{ Å}$<br>$c = 18.920(2) \text{ Å}$ | $\alpha = 110.973(4)^\circ$<br>$\beta = 97.457(4)^\circ$<br>$\gamma = 95.362(4)^\circ$ |
| Volume                                  | $2565.2(5) \text{ Å}^3$                                                                |                                                                                        |
| Z                                       | 4                                                                                      |                                                                                        |
| Density (calculated)                    | $1.650 \text{ Mg}\cdot\text{m}^{-3}$                                                   |                                                                                        |
| Absorption coefficient                  | $7.093 \text{ mm}^{-1}$                                                                |                                                                                        |
| F(000)                                  | 1248 e                                                                                 |                                                                                        |
| Crystal size                            | $0.197 \times 0.11 \times 0.052 \text{ mm}^3$                                          |                                                                                        |
| $\theta$ range for data collection      | 1.303 to $30.505^\circ$ .                                                              |                                                                                        |
| Index ranges                            | $-12 \leq h \leq 12$ , $-24 \leq k \leq 24$ , $-27 \leq l \leq 27$                     |                                                                                        |
| Reflections collected                   | 80609                                                                                  |                                                                                        |
| Independent reflections                 | 15659 [ $R_{\text{int}} = 0.0452$ ]                                                    |                                                                                        |
| Reflections with $I > 2\sigma(I)$       | 13657                                                                                  |                                                                                        |
| Completeness to $\theta = 25.242^\circ$ | 100.0 %                                                                                |                                                                                        |
| Absorption correction                   | Gaussian                                                                               |                                                                                        |
| Max. and min. transmission              | 0.73960 and 0.37248                                                                    |                                                                                        |
| Refinement method                       | Full-matrix least-squares on $F^2$                                                     |                                                                                        |
| Data / restraints / parameters          | 15659 / 0 / 559                                                                        |                                                                                        |
| Goodness-of-fit on $F^2$                | 1.078                                                                                  |                                                                                        |
| Final R indices [ $I > 2\sigma(I)$ ]    | $R_1 = 0.0269$                                                                         | $wR^2 = 0.0664$                                                                        |
| R indices (all data)                    | $R_1 = 0.0341$                                                                         | $wR^2 = 0.0689$                                                                        |
| Extinction coefficient                  | n/a                                                                                    |                                                                                        |
| Largest diff. peak and hole             | 2.351 and $-1.569 \text{ e}\cdot\text{Å}^{-3}$                                         |                                                                                        |

**Table S11. Bond lengths [Å] and angles [°].**

---

|              |           |              |           |
|--------------|-----------|--------------|-----------|
| Bi(1)-Cl(1)  | 2.6029(7) | Bi(1)-Cl(2)  | 2.6037(7) |
| Bi(1)-C(1)   | 2.233(3)  | Bi(1)-C(10)  | 2.237(3)  |
| Bi(1)-C(19)  | 2.233(3)  | C(1)-C(2)    | 1.394(4)  |
| C(1)-C(6)    | 1.395(4)  | C(2)-C(3)    | 1.388(4)  |
| C(2)-C(7)    | 1.505(4)  | C(3)-H(3)    | 0.9500    |
| C(3)-C(4)    | 1.387(5)  | C(4)-C(5)    | 1.377(5)  |
| C(4)-C(8)    | 1.509(4)  | C(5)-H(5)    | 0.9500    |
| C(5)-C(6)    | 1.399(4)  | C(6)-C(9)    | 1.503(4)  |
| C(7)-H(7A)   | 0.9800    | C(7)-H(7B)   | 0.9800    |
| C(7)-H(7C)   | 0.9800    | C(8)-H(8A)   | 0.9800    |
| C(8)-H(8B)   | 0.9800    | C(8)-H(8C)   | 0.9800    |
| C(9)-H(9A)   | 0.9800    | C(9)-H(9B)   | 0.9800    |
| C(9)-H(9C)   | 0.9800    | C(10)-C(11)  | 1.396(4)  |
| C(10)-C(15)  | 1.403(4)  | C(11)-C(12)  | 1.395(5)  |
| C(11)-C(16)  | 1.509(5)  | C(12)-H(12)  | 0.9500    |
| C(12)-C(13)  | 1.386(5)  | C(13)-C(14)  | 1.380(5)  |
| C(13)-C(17)  | 1.512(5)  | C(14)-H(14)  | 0.9500    |
| C(14)-C(15)  | 1.392(4)  | C(15)-C(18)  | 1.514(4)  |
| C(16)-H(16A) | 0.9800    | C(16)-H(16B) | 0.9800    |
| C(16)-H(16C) | 0.9800    | C(17)-H(17A) | 0.9800    |
| C(17)-H(17B) | 0.9800    | C(17)-H(17C) | 0.9800    |
| C(18)-H(18A) | 0.9800    | C(18)-H(18B) | 0.9800    |
| C(18)-H(18C) | 0.9800    | C(19)-C(20)  | 1.401(4)  |
| C(19)-C(24)  | 1.389(4)  | C(20)-C(21)  | 1.393(4)  |
| C(20)-C(25)  | 1.504(4)  | C(21)-H(21)  | 0.9500    |
| C(21)-C(22)  | 1.382(4)  | C(22)-C(23)  | 1.383(4)  |
| C(22)-C(26)  | 1.509(4)  | C(23)-H(23)  | 0.9500    |
| C(23)-C(24)  | 1.397(4)  | C(24)-C(27)  | 1.501(4)  |
| C(25)-H(25A) | 0.9800    | C(25)-H(25B) | 0.9800    |
| C(25)-H(25C) | 0.9800    | C(26)-H(26A) | 0.9800    |
| C(26)-H(26B) | 0.9800    | C(26)-H(26C) | 0.9800    |
| C(27)-H(27A) | 0.9800    | C(27)-H(27B) | 0.9800    |
| C(27)-H(27C) | 0.9800    | Bi(2)-Cl(3)  | 2.5925(8) |
| Bi(2)-Cl(4)  | 2.6283(8) | Bi(2)-C(31)  | 2.245(3)  |
| Bi(2)-C(40)  | 2.226(3)  | Bi(2)-C(49)  | 2.237(3)  |
| C(31)-C(32)  | 1.392(4)  | C(31)-C(36)  | 1.403(4)  |

|                   |            |                   |            |
|-------------------|------------|-------------------|------------|
| C(32)-C(33)       | 1.397(5)   | C(32)-C(37)       | 1.498(5)   |
| C(33)-H(33)       | 0.9500     | C(33)-C(34)       | 1.383(5)   |
| C(34)-C(35)       | 1.385(5)   | C(34)-C(38)       | 1.500(5)   |
| C(35)-H(35)       | 0.9500     | C(35)-C(36)       | 1.390(4)   |
| C(36)-C(39)       | 1.504(4)   | C(37)-H(37A)      | 0.9800     |
| C(37)-H(37B)      | 0.9800     | C(37)-H(37C)      | 0.9800     |
| C(38)-H(38A)      | 0.9800     | C(38)-H(38B)      | 0.9800     |
| C(38)-H(38C)      | 0.9800     | C(39)-H(39A)      | 0.9800     |
| C(39)-H(39B)      | 0.9800     | C(39)-H(39C)      | 0.9800     |
| C(40)-C(41)       | 1.406(5)   | C(40)-C(45)       | 1.398(4)   |
| C(41)-C(42)       | 1.397(5)   | C(41)-C(46)       | 1.505(5)   |
| C(42)-H(42)       | 0.9500     | C(42)-C(43)       | 1.372(6)   |
| C(43)-C(44)       | 1.374(6)   | C(43)-C(47)       | 1.507(5)   |
| C(44)-H(44)       | 0.9500     | C(44)-C(45)       | 1.400(5)   |
| C(45)-C(48)       | 1.492(5)   | C(46)-H(46A)      | 0.9800     |
| C(46)-H(46B)      | 0.9800     | C(46)-H(46C)      | 0.9800     |
| C(47)-H(47A)      | 0.9800     | C(47)-H(47B)      | 0.9800     |
| C(47)-H(47C)      | 0.9800     | C(48)-H(48A)      | 0.9800     |
| C(48)-H(48B)      | 0.9800     | C(48)-H(48C)      | 0.9800     |
| C(49)-C(50)       | 1.400(4)   | C(49)-C(54)       | 1.396(4)   |
| C(50)-C(51)       | 1.398(4)   | C(50)-C(55)       | 1.506(4)   |
| C(51)-H(51)       | 0.9500     | C(51)-C(52)       | 1.380(5)   |
| C(52)-C(53)       | 1.380(5)   | C(52)-C(56)       | 1.510(5)   |
| C(53)-H(53)       | 0.9500     | C(53)-C(54)       | 1.393(5)   |
| C(54)-C(57)       | 1.502(5)   | C(55)-H(55A)      | 0.9800     |
| C(55)-H(55B)      | 0.9800     | C(55)-H(55C)      | 0.9800     |
| C(56)-H(56A)      | 0.9800     | C(56)-H(56B)      | 0.9800     |
| C(56)-H(56C)      | 0.9800     | C(57)-H(57A)      | 0.9800     |
| C(57)-H(57B)      | 0.9800     | C(57)-H(57C)      | 0.9800     |
|                   |            |                   |            |
| Cl(1)-Bi(1)-Cl(2) | 175.65(2)  | C(1)-Bi(1)-Cl(1)  | 87.72(7)   |
| C(1)-Bi(1)-Cl(2)  | 87.95(7)   | C(1)-Bi(1)-C(10)  | 123.31(11) |
| C(10)-Bi(1)-Cl(1) | 92.46(8)   | C(10)-Bi(1)-Cl(2) | 90.26(8)   |
| C(19)-Bi(1)-Cl(1) | 90.54(7)   | C(19)-Bi(1)-Cl(2) | 91.43(7)   |
| C(19)-Bi(1)-C(1)  | 122.32(10) | C(19)-Bi(1)-C(10) | 114.36(10) |
| C(2)-C(1)-Bi(1)   | 118.9(2)   | C(2)-C(1)-C(6)    | 122.9(3)   |
| C(6)-C(1)-Bi(1)   | 118.1(2)   | C(1)-C(2)-C(7)    | 125.7(3)   |
| C(3)-C(2)-C(1)    | 117.2(3)   | C(3)-C(2)-C(7)    | 117.1(3)   |

|                     |          |                     |            |
|---------------------|----------|---------------------|------------|
| C(2)-C(3)-H(3)      | 119.0    | C(4)-C(3)-C(2)      | 122.0(3)   |
| C(4)-C(3)-H(3)      | 119.0    | C(3)-C(4)-C(8)      | 119.9(3)   |
| C(5)-C(4)-C(3)      | 118.9(3) | C(5)-C(4)-C(8)      | 121.2(3)   |
| C(4)-C(5)-H(5)      | 119.0    | C(4)-C(5)-C(6)      | 122.0(3)   |
| C(6)-C(5)-H(5)      | 119.0    | C(1)-C(6)-C(5)      | 116.9(3)   |
| C(1)-C(6)-C(9)      | 126.0(3) | C(5)-C(6)-C(9)      | 117.1(3)   |
| C(2)-C(7)-H(7A)     | 109.5    | C(2)-C(7)-H(7B)     | 109.5      |
| C(2)-C(7)-H(7C)     | 109.5    | H(7A)-C(7)-H(7B)    | 109.5      |
| H(7A)-C(7)-H(7C)    | 109.5    | H(7B)-C(7)-H(7C)    | 109.5      |
| C(4)-C(8)-H(8A)     | 109.5    | C(4)-C(8)-H(8B)     | 109.5      |
| C(4)-C(8)-H(8C)     | 109.5    | H(8A)-C(8)-H(8B)    | 109.5      |
| H(8A)-C(8)-H(8C)    | 109.5    | H(8B)-C(8)-H(8C)    | 109.5      |
| C(6)-C(9)-H(9A)     | 109.5    | C(6)-C(9)-H(9B)     | 109.5      |
| C(6)-C(9)-H(9C)     | 109.5    | H(9A)-C(9)-H(9B)    | 109.5      |
| H(9A)-C(9)-H(9C)    | 109.5    | H(9B)-C(9)-H(9C)    | 109.5      |
| C(11)-C(10)-Bi(1)   | 119.4(2) | C(11)-C(10)-C(15)   | 122.2(3)   |
| C(15)-C(10)-Bi(1)   | 118.1(2) | C(10)-C(11)-C(16)   | 125.4(3)   |
| C(12)-C(11)-C(10)   | 117.0(3) | C(12)-C(11)-C(16)   | 117.5(3)   |
| C(11)-C(12)-H(12)   | 118.7    | C(13)-C(12)-C(11)   | 122.6(3)   |
| C(13)-C(12)-H(12)   | 118.7    | C(12)-C(13)-C(17)   | 121.0(4)   |
| C(14)-C(13)-C(12)   | 118.3(3) | C(14)-C(13)-C(17)   | 120.7(4)   |
| C(13)-C(14)-H(14)   | 118.9    | C(13)-C(14)-C(15)   | 122.1(3)   |
| C(15)-C(14)-H(14)   | 118.9    | C(10)-C(15)-C(18)   | 125.6(3)   |
| C(14)-C(15)-C(10)   | 117.6(3) | C(14)-C(15)-C(18)   | 116.9(3)   |
| C(11)-C(16)-H(16A)  | 109.5    | C(11)-C(16)-H(16B)  | 109.5      |
| C(11)-C(16)-H(16C)  | 109.5    | H(16A)-C(16)-H(16B) | 109.5      |
| H(16A)-C(16)-H(16C) | 109.5    | H(16B)-C(16)-H(16C) | 109.5      |
| C(13)-C(17)-H(17A)  | 109.5    | C(13)-C(17)-H(17B)  | 109.5      |
| C(13)-C(17)-H(17C)  | 109.5    | H(17A)-C(17)-H(17B) | 109.5      |
| H(17A)-C(17)-H(17C) | 109.5    | H(17B)-C(17)-H(17C) | 109.5      |
| C(15)-C(18)-H(18A)  | 109.5    | C(15)-C(18)-H(18B)  | 109.5      |
| C(15)-C(18)-H(18C)  | 109.5    | H(18A)-C(18)-H(18B) | 109.5      |
| H(18A)-C(18)-H(18C) | 109.5    | H(18B)-C(18)-H(18C) | 109.5      |
| C(20)-C(19)-Bi(1)   | 118.4(2) | C(24)-C(19)-Bi(1)   | 118.81(19) |
| C(24)-C(19)-C(20)   | 122.4(3) | C(19)-C(20)-C(25)   | 126.0(3)   |
| C(21)-C(20)-C(19)   | 117.0(3) | C(21)-C(20)-C(25)   | 116.9(2)   |
| C(20)-C(21)-H(21)   | 118.7    | C(22)-C(21)-C(20)   | 122.6(3)   |
| C(22)-C(21)-H(21)   | 118.7    | C(21)-C(22)-C(23)   | 118.2(3)   |

|                     |            |                     |            |
|---------------------|------------|---------------------|------------|
| C(21)-C(22)-C(26)   | 120.3(3)   | C(23)-C(22)-C(26)   | 121.5(3)   |
| C(22)-C(23)-H(23)   | 119.0      | C(22)-C(23)-C(24)   | 122.1(3)   |
| C(24)-C(23)-H(23)   | 119.0      | C(19)-C(24)-C(23)   | 117.6(3)   |
| C(19)-C(24)-C(27)   | 125.8(2)   | C(23)-C(24)-C(27)   | 116.6(3)   |
| C(20)-C(25)-H(25A)  | 109.5      | C(20)-C(25)-H(25B)  | 109.5      |
| C(20)-C(25)-H(25C)  | 109.5      | H(25A)-C(25)-H(25B) | 109.5      |
| H(25A)-C(25)-H(25C) | 109.5      | H(25B)-C(25)-H(25C) | 109.5      |
| C(22)-C(26)-H(26A)  | 109.5      | C(22)-C(26)-H(26B)  | 109.5      |
| C(22)-C(26)-H(26C)  | 109.5      | H(26A)-C(26)-H(26B) | 109.5      |
| H(26A)-C(26)-H(26C) | 109.5      | H(26B)-C(26)-H(26C) | 109.5      |
| C(24)-C(27)-H(27A)  | 109.5      | C(24)-C(27)-H(27B)  | 109.5      |
| C(24)-C(27)-H(27C)  | 109.5      | H(27A)-C(27)-H(27B) | 109.5      |
| H(27A)-C(27)-H(27C) | 109.5      | H(27B)-C(27)-H(27C) | 109.5      |
| Cl(3)-Bi(2)-Cl(4)   | 176.23(3)  | C(31)-Bi(2)-Cl(3)   | 90.16(8)   |
| C(31)-Bi(2)-Cl(4)   | 89.62(8)   | C(40)-Bi(2)-Cl(3)   | 90.10(8)   |
| C(40)-Bi(2)-Cl(4)   | 93.38(8)   | C(40)-Bi(2)-C(31)   | 116.00(11) |
| C(40)-Bi(2)-C(49)   | 119.05(11) | C(49)-Bi(2)-Cl(3)   | 89.59(8)   |
| C(49)-Bi(2)-Cl(4)   | 87.44(8)   | C(49)-Bi(2)-C(31)   | 124.95(11) |
| C(32)-C(31)-Bi(2)   | 119.2(2)   | C(32)-C(31)-C(36)   | 122.3(3)   |
| C(36)-C(31)-Bi(2)   | 118.4(2)   | C(31)-C(32)-C(33)   | 117.4(3)   |
| C(31)-C(32)-C(37)   | 125.2(3)   | C(33)-C(32)-C(37)   | 117.4(3)   |
| C(32)-C(33)-H(33)   | 118.8      | C(34)-C(33)-C(32)   | 122.5(3)   |
| C(34)-C(33)-H(33)   | 118.8      | C(33)-C(34)-C(35)   | 117.8(3)   |
| C(33)-C(34)-C(38)   | 121.8(3)   | C(35)-C(34)-C(38)   | 120.4(3)   |
| C(34)-C(35)-H(35)   | 118.6      | C(34)-C(35)-C(36)   | 122.8(3)   |
| C(36)-C(35)-H(35)   | 118.6      | C(31)-C(36)-C(39)   | 125.9(3)   |
| C(35)-C(36)-C(31)   | 117.1(3)   | C(35)-C(36)-C(39)   | 117.0(3)   |
| C(32)-C(37)-H(37A)  | 109.5      | C(32)-C(37)-H(37B)  | 109.5      |
| C(32)-C(37)-H(37C)  | 109.5      | H(37A)-C(37)-H(37B) | 109.5      |
| H(37A)-C(37)-H(37C) | 109.5      | H(37B)-C(37)-H(37C) | 109.5      |
| C(34)-C(38)-H(38A)  | 109.5      | C(34)-C(38)-H(38B)  | 109.5      |
| C(34)-C(38)-H(38C)  | 109.5      | H(38A)-C(38)-H(38B) | 109.5      |
| H(38A)-C(38)-H(38C) | 109.5      | H(38B)-C(38)-H(38C) | 109.5      |
| C(36)-C(39)-H(39A)  | 109.5      | C(36)-C(39)-H(39B)  | 109.5      |
| C(36)-C(39)-H(39C)  | 109.5      | H(39A)-C(39)-H(39B) | 109.5      |
| H(39A)-C(39)-H(39C) | 109.5      | H(39B)-C(39)-H(39C) | 109.5      |
| C(41)-C(40)-Bi(2)   | 117.4(2)   | C(45)-C(40)-Bi(2)   | 119.7(2)   |
| C(45)-C(40)-C(41)   | 122.8(3)   | C(40)-C(41)-C(46)   | 125.3(3)   |

|                     |          |                     |          |
|---------------------|----------|---------------------|----------|
| C(42)-C(41)-C(40)   | 116.9(3) | C(42)-C(41)-C(46)   | 117.7(3) |
| C(41)-C(42)-H(42)   | 118.9    | C(43)-C(42)-C(41)   | 122.2(4) |
| C(43)-C(42)-H(42)   | 118.9    | C(42)-C(43)-C(44)   | 119.0(3) |
| C(42)-C(43)-C(47)   | 121.0(4) | C(44)-C(43)-C(47)   | 120.0(4) |
| C(43)-C(44)-H(44)   | 118.6    | C(43)-C(44)-C(45)   | 122.8(3) |
| C(45)-C(44)-H(44)   | 118.6    | C(40)-C(45)-C(44)   | 116.4(3) |
| C(40)-C(45)-C(48)   | 126.2(3) | C(44)-C(45)-C(48)   | 117.4(3) |
| C(41)-C(46)-H(46A)  | 109.5    | C(41)-C(46)-H(46B)  | 109.5    |
| C(41)-C(46)-H(46C)  | 109.5    | H(46A)-C(46)-H(46B) | 109.5    |
| H(46A)-C(46)-H(46C) | 109.5    | H(46B)-C(46)-H(46C) | 109.5    |
| C(43)-C(47)-H(47A)  | 109.5    | C(43)-C(47)-H(47B)  | 109.5    |
| C(43)-C(47)-H(47C)  | 109.5    | H(47A)-C(47)-H(47B) | 109.5    |
| H(47A)-C(47)-H(47C) | 109.5    | H(47B)-C(47)-H(47C) | 109.5    |
| C(45)-C(48)-H(48A)  | 109.5    | C(45)-C(48)-H(48B)  | 109.5    |
| C(45)-C(48)-H(48C)  | 109.5    | H(48A)-C(48)-H(48B) | 109.5    |
| H(48A)-C(48)-H(48C) | 109.5    | H(48B)-C(48)-H(48C) | 109.5    |
| C(50)-C(49)-Bi(2)   | 118.1(2) | C(54)-C(49)-Bi(2)   | 119.2(2) |
| C(54)-C(49)-C(50)   | 122.7(3) | C(49)-C(50)-C(55)   | 125.6(3) |
| C(51)-C(50)-C(49)   | 116.9(3) | C(51)-C(50)-C(55)   | 117.5(3) |
| C(50)-C(51)-H(51)   | 118.8    | C(52)-C(51)-C(50)   | 122.3(3) |
| C(52)-C(51)-H(51)   | 118.8    | C(51)-C(52)-C(56)   | 120.8(3) |
| C(53)-C(52)-C(51)   | 118.5(3) | C(53)-C(52)-C(56)   | 120.7(4) |
| C(52)-C(53)-H(53)   | 118.7    | C(52)-C(53)-C(54)   | 122.5(3) |
| C(54)-C(53)-H(53)   | 118.7    | C(49)-C(54)-C(57)   | 125.8(3) |
| C(53)-C(54)-C(49)   | 117.1(3) | C(53)-C(54)-C(57)   | 117.1(3) |
| C(50)-C(55)-H(55A)  | 109.5    | C(50)-C(55)-H(55B)  | 109.5    |
| C(50)-C(55)-H(55C)  | 109.5    | H(55A)-C(55)-H(55B) | 109.5    |
| H(55A)-C(55)-H(55C) | 109.5    | H(55B)-C(55)-H(55C) | 109.5    |
| C(52)-C(56)-H(56A)  | 109.5    | C(52)-C(56)-H(56B)  | 109.5    |
| C(52)-C(56)-H(56C)  | 109.5    | H(56A)-C(56)-H(56B) | 109.5    |
| H(56A)-C(56)-H(56C) | 109.5    | H(56B)-C(56)-H(56C) | 109.5    |
| C(54)-C(57)-H(57A)  | 109.5    | C(54)-C(57)-H(57B)  | 109.5    |
| C(54)-C(57)-H(57C)  | 109.5    | H(57A)-C(57)-H(57B) | 109.5    |
| H(57A)-C(57)-H(57C) | 109.5    | H(57B)-C(57)-H(57C) | 109.5    |

---

9.6 Single crystal structure analysis of ( $\mu$ -chloro)-dichloro-hexaphenyl-di-bismuth tetrakis(3,5-bis(trifluoromethyl)phenyl)borate (9a)

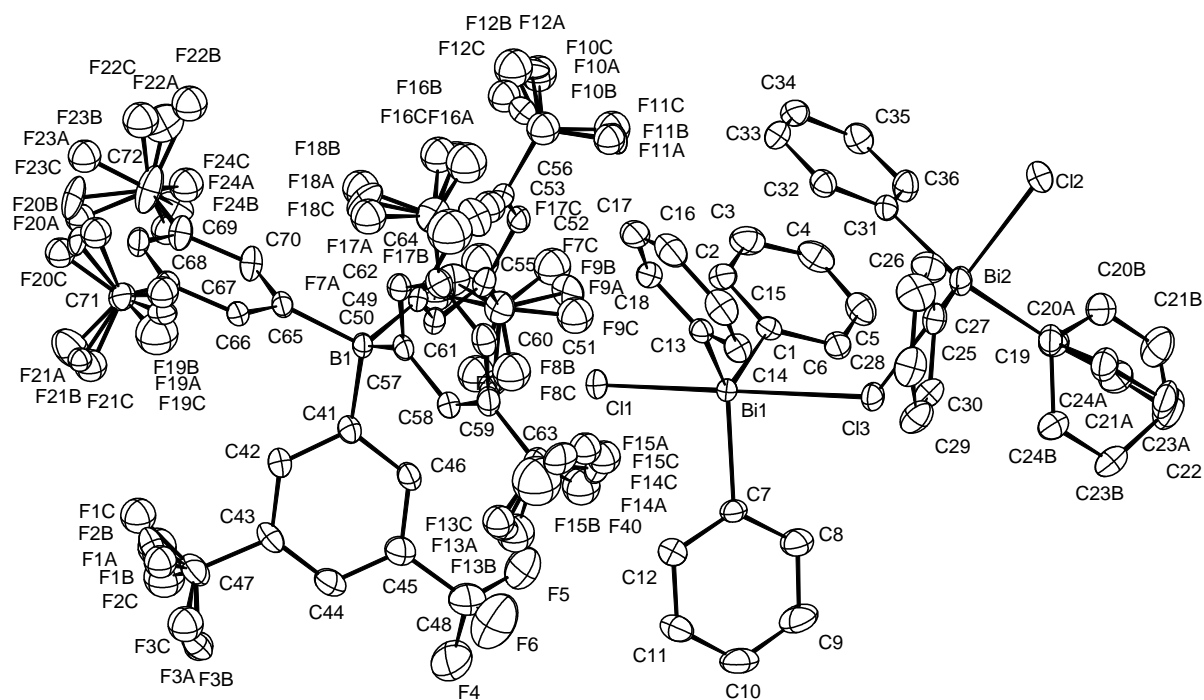

**Figure S24:** The solid state structure of **9a**. H atoms have been removed for clarity and disordered parts shown in grey.

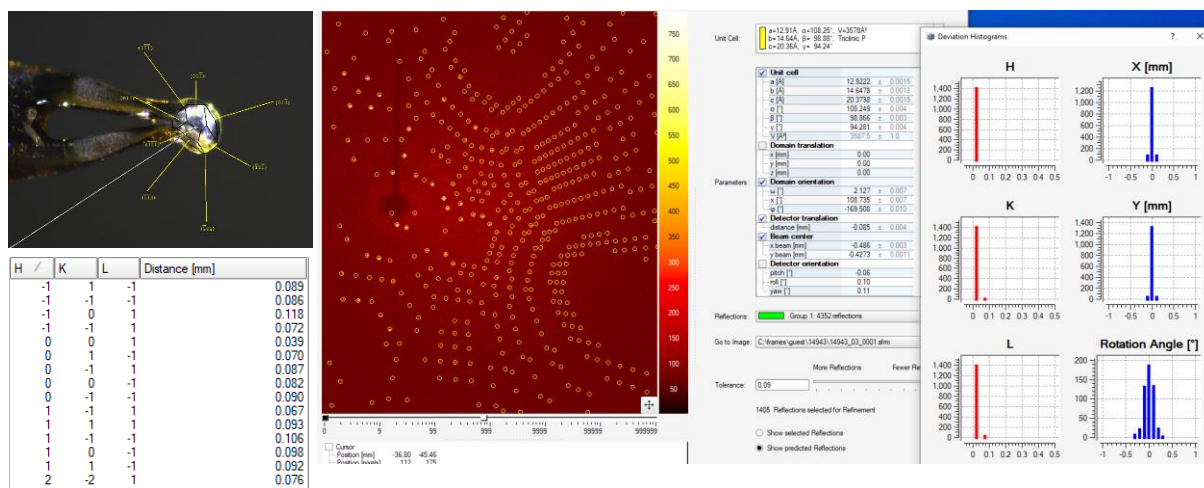

Figure S25: Crystal faces and unit cell determination/refinement of **9a**.

INTENSITY STATISTICS FOR DATASET # 1 14943sadabs.raw

| Resolution  | #Data | #Theory | %Complete | Redundancy | Mean I | Mean I/s | Rmerge | Rsigma |
|-------------|-------|---------|-----------|------------|--------|----------|--------|--------|
| Inf - 2.62  | 412   | 418     | 98.6      | 26.70      | 145.34 | 60.26    | 0.0378 | 0.0380 |
| 2.62 - 1.76 | 955   | 957     | 99.8      | 28.28      | 111.01 | 63.09    | 0.0411 | 0.0276 |
| 1.76 - 1.40 | 1360  | 1360    | 100.0     | 29.95      | 70.61  | 62.09    | 0.0431 | 0.0169 |
| 1.40 - 1.22 | 1391  | 1391    | 100.0     | 31.11      | 51.99  | 59.28    | 0.0466 | 0.0132 |
| 1.22 - 1.11 | 1349  | 1349    | 100.0     | 30.06      | 42.87  | 53.47    | 0.0507 | 0.0135 |
| 1.11 - 1.03 | 1388  | 1388    | 100.0     | 29.14      | 34.69  | 47.08    | 0.0581 | 0.0148 |
| 1.03 - 0.97 | 1340  | 1340    | 100.0     | 28.45      | 28.19  | 41.79    | 0.0677 | 0.0165 |
| 0.97 - 0.92 | 1384  | 1384    | 100.0     | 27.98      | 25.38  | 38.49    | 0.0737 | 0.0177 |
| 0.92 - 0.88 | 1403  | 1403    | 100.0     | 26.92      | 19.68  | 32.96    | 0.0890 | 0.0207 |
| 0.88 - 0.84 | 1655  | 1655    | 100.0     | 25.58      | 17.71  | 30.06    | 0.1008 | 0.0233 |
| 0.84 - 0.81 | 1437  | 1437    | 100.0     | 25.22      | 15.67  | 27.38    | 0.1116 | 0.0258 |
| 0.81 - 0.79 | 1148  | 1148    | 100.0     | 24.69      | 14.00  | 25.45    | 0.1230 | 0.0286 |
| 0.79 - 0.77 | 1168  | 1168    | 100.0     | 24.10      | 12.26  | 22.95    | 0.1333 | 0.0319 |
| 0.77 - 0.75 | 1358  | 1358    | 100.0     | 23.49      | 10.82  | 20.50    | 0.1438 | 0.0355 |
| 0.75 - 0.73 | 1487  | 1487    | 100.0     | 22.97      | 10.15  | 19.27    | 0.1519 | 0.0385 |
| 0.73 - 0.71 | 1700  | 1700    | 100.0     | 22.17      | 9.31   | 17.40    | 0.1596 | 0.0427 |
| 0.71 - 0.70 | 882   | 882     | 100.0     | 21.50      | 8.45   | 16.15    | 0.1717 | 0.0475 |
| 0.70 - 0.68 | 1978  | 1978    | 100.0     | 21.06      | 7.38   | 14.05    | 0.1839 | 0.0537 |
| 0.68 - 0.67 | 1103  | 1103    | 100.0     | 19.94      | 6.80   | 12.67    | 0.1926 | 0.0604 |
| 0.67 - 0.66 | 1160  | 1160    | 100.0     | 19.88      | 6.35   | 11.82    | 0.2049 | 0.0653 |
| 0.66 - 0.65 | 1188  | 1254    | 94.7      | 17.42      | 5.22   | 9.61     | 0.2288 | 0.0897 |
| -----       |       |         |           |            |        |          |        |        |
| 0.75 - 0.65 | 9498  | 9564    | 99.3      | 20.85      | 7.80   | 14.68    | 0.1763 | 0.0525 |
| Inf - 0.65  | 27246 | 27320   | 99.7      | 25.04      | 26.12  | 31.47    | 0.0759 | 0.0248 |

Complete .cif-data of the compound are available under the CCDC number **CCDC-2289343**.



**Table S12. Crystal data and structure refinement.**

|                                   |                                                                                   |                                                        |
|-----------------------------------|-----------------------------------------------------------------------------------|--------------------------------------------------------|
| Identification code               | 14943sadabs                                                                       |                                                        |
| Empirical formula                 | C <sub>68</sub> H <sub>42</sub> B Bi <sub>2</sub> Cl <sub>3</sub> F <sub>24</sub> |                                                        |
| Color                             | colourless                                                                        |                                                        |
| Formula weight                    | 1850.13 g·mol <sup>-1</sup>                                                       |                                                        |
| Temperature                       | 100(2) K                                                                          |                                                        |
| Wavelength                        | 0.71073 Å                                                                         |                                                        |
| Crystal system                    | Triclinic                                                                         |                                                        |
| Space group                       | P-1, (no. 2)                                                                      |                                                        |
| Unit cell dimensions              | a = 12.9043(18) Å<br>b = 14.639(2) Å<br>c = 20.359(3) Å                           | α = 108.297(6)°.<br>β = 98.848(7)°.<br>γ = 94.297(7)°. |
| Volume                            | 3576.9(9) Å <sup>3</sup>                                                          |                                                        |
| Z                                 | 2                                                                                 |                                                        |
| Density (calculated)              | 1.718 Mg·m <sup>-3</sup>                                                          |                                                        |
| Absorption coefficient            | 5.126 mm <sup>-1</sup>                                                            |                                                        |
| F(000)                            | 1776 e                                                                            |                                                        |
| Crystal size                      | 0.202 x 0.185 x 0.173 mm <sup>3</sup>                                             |                                                        |
| θ range for data collection       | 1.760 to 27.500°.                                                                 |                                                        |
| Index ranges                      | -16 ≤ h ≤ 16, -19 ≤ k ≤ 19, -26 ≤ l ≤ 26                                          |                                                        |
| Reflections collected             | 453473                                                                            |                                                        |
| Independent reflections           | 16412 [R <sub>int</sub> = 0.0637]                                                 |                                                        |
| Reflections with I > 2σ(I)        | 15218                                                                             |                                                        |
| Completeness to θ = 25.242°       | 99.9 %                                                                            |                                                        |
| Absorption correction             | Gaussian                                                                          |                                                        |
| Max. and min. transmission        | 0.9604 and 0.4447                                                                 |                                                        |
| Refinement method                 | Full-matrix least-squares on F <sup>2</sup>                                       |                                                        |
| Data / restraints / parameters    | 16412 / 90 / 1087                                                                 |                                                        |
| Goodness-of-fit on F <sup>2</sup> | 1.028                                                                             |                                                        |
| Final R indices [I > 2σ(I)]       | R <sub>1</sub> = 0.0217                                                           | wR <sup>2</sup> = 0.0505                               |
| R indices (all data)              | R <sub>1</sub> = 0.0244                                                           | wR <sup>2</sup> = 0.0522                               |
| Extinction coefficient            | n/a                                                                               |                                                        |
| Largest diff. peak and hole       | 1.331 and -1.677 e·Å <sup>-3</sup>                                                |                                                        |

**Table S13. Bond lengths [Å] and angles [°].**

---

|              |            |              |            |
|--------------|------------|--------------|------------|
| Bi(1)-Cl(1)  | 2.4856(7)  | Bi(1)-Cl(3)  | 2.7995(7)  |
| Bi(1)-C(1)   | 2.212(3)   | Bi(1)-C(7)   | 2.204(2)   |
| Bi(1)-C(13)  | 2.211(3)   | Bi(2)-Cl(2)  | 2.4996(8)  |
| Bi(2)-Cl(3)  | 2.8274(7)  | Bi(2)-C(19)  | 2.187(3)   |
| Bi(2)-C(25)  | 2.189(3)   | Bi(2)-C(31)  | 2.185(3)   |
| F(1A)-C(47)  | 1.290(6)   | F(1B)-C(47)  | 1.318(12)  |
| F(1C)-C(47)  | 1.544(10)  | F(2A)-C(47)  | 1.351(11)  |
| F(2B)-C(47)  | 1.27(2)    | F(2C)-C(47)  | 1.28(3)    |
| F(3A)-C(47)  | 1.384(5)   | F(3B)-C(47)  | 1.417(9)   |
| F(3C)-C(47)  | 1.293(9)   | F(4)-C(48)   | 1.335(5)   |
| F(5)-C(48)   | 1.257(5)   | F(6)-C(48)   | 1.392(6)   |
| F(7A)-C(55)  | 1.341(7)   | F(7B)-C(55)  | 1.41(2)    |
| F(7C)-C(55)  | 1.301(12)  | F(8A)-C(55)  | 1.392(7)   |
| F(8B)-C(55)  | 1.192(17)  | F(8C)-C(55)  | 1.323(16)  |
| F(9A)-C(55)  | 1.339(5)   | F(9B)-C(55)  | 1.343(13)  |
| F(9C)-C(55)  | 1.393(14)  | F(10A)-C(56) | 1.341(6)   |
| F(10B)-C(56) | 1.455(16)  | F(10C)-C(56) | 1.252(11)  |
| F(11A)-C(56) | 1.369(6)   | F(11B)-C(56) | 1.307(11)  |
| F(11C)-C(56) | 1.337(14)  | F(12A)-C(56) | 1.329(5)   |
| F(12B)-C(56) | 1.320(10)  | F(12C)-C(56) | 1.435(10)  |
| F(13A)-C(63) | 1.331(5)   | F(13B)-C(63) | 1.469(11)  |
| F(13C)-C(63) | 1.329(9)   | F(14A)-C(63) | 1.352(5)   |
| F(14C)-C(63) | 1.271(10)  | F(15A)-C(63) | 1.371(5)   |
| F(15B)-C(63) | 1.299(16)  | F(15C)-C(63) | 1.352(9)   |
| F(16A)-C(64) | 1.422(10)  | F(16B)-C(64) | 1.21(2)    |
| F(16C)-C(64) | 1.28(2)    | F(17A)-C(64) | 1.356(6)   |
| F(17B)-C(64) | 1.335(16)  | F(17C)-C(64) | 1.359(16)  |
| F(18A)-C(64) | 1.328(7)   | F(18B)-C(64) | 1.402(18)  |
| F(18C)-C(64) | 1.343(18)  | F(19A)-C(71) | 1.354(5)   |
| F(19B)-C(71) | 1.3792(11) | F(19C)-C(71) | 1.3796(11) |
| F(20A)-C(71) | 1.329(4)   | F(20B)-C(71) | 1.3798(10) |
| F(20C)-C(71) | 1.3796(10) | F(21A)-C(71) | 1.350(6)   |
| F(21B)-C(71) | 1.3787(10) | F(21C)-C(71) | 1.3799(10) |
| F(22A)-C(72) | 1.231(8)   | F(22B)-C(72) | 1.720(11)  |
| F(22C)-C(72) | 1.314(15)  | F(23A)-C(72) | 1.382(6)   |
| F(23B)-C(72) | 1.322(9)   | F(23C)-C(72) | 1.391(12)  |

|               |           |               |           |
|---------------|-----------|---------------|-----------|
| F(24A)-C(72)  | 1.333(6)  | F(24B)-C(72)  | 1.472(12) |
| F(24C)-C(72)  | 1.247(13) | F(40)-C(63)   | 1.383(12) |
| C(1)-C(2)     | 1.386(4)  | C(1)-C(6)     | 1.384(4)  |
| C(2)-H(2)     | 0.9500    | C(2)-C(3)     | 1.386(4)  |
| C(3)-H(3)     | 0.9500    | C(3)-C(4)     | 1.384(5)  |
| C(4)-H(4)     | 0.9500    | C(4)-C(5)     | 1.383(5)  |
| C(5)-H(5)     | 0.9500    | C(5)-C(6)     | 1.387(4)  |
| C(6)-H(6)     | 0.9500    | C(7)-C(8)     | 1.378(4)  |
| C(7)-C(12)    | 1.378(4)  | C(8)-H(8)     | 0.9500    |
| C(8)-C(9)     | 1.389(4)  | C(9)-H(9)     | 0.9500    |
| C(9)-C(10)    | 1.374(5)  | C(10)-H(10)   | 0.9500    |
| C(10)-C(11)   | 1.369(5)  | C(11)-H(11)   | 0.9500    |
| C(11)-C(12)   | 1.391(4)  | C(12)-H(12)   | 0.9500    |
| C(13)-C(14)   | 1.381(4)  | C(13)-C(18)   | 1.387(4)  |
| C(14)-H(14)   | 0.9500    | C(14)-C(15)   | 1.394(4)  |
| C(15)-H(15)   | 0.9500    | C(15)-C(16)   | 1.386(5)  |
| C(16)-H(16)   | 0.9500    | C(16)-C(17)   | 1.386(5)  |
| C(17)-H(17)   | 0.9500    | C(17)-C(18)   | 1.391(4)  |
| C(18)-H(18)   | 0.9500    | C(19)-C(20A)  | 1.343(5)  |
| C(19)-C(20B)  | 1.343(11) | C(19)-C(24A)  | 1.383(5)  |
| C(19)-C(24B)  | 1.558(11) | C(20A)-H(20A) | 0.9500    |
| C(20A)-C(21A) | 1.394(6)  | C(20B)-H(20B) | 0.9500    |
| C(20B)-C(21B) | 1.392(15) | C(21A)-H(21A) | 0.9500    |
| C(21A)-C(22)  | 1.343(7)  | C(21B)-H(21B) | 0.9500    |
| C(21B)-C(22)  | 1.182(13) | C(22)-H(22)   | 0.9500    |
| C(22)-H(22A)  | 0.9500    | C(22)-C(23A)  | 1.455(7)  |
| C(22)-C(23B)  | 1.504(13) | C(23A)-H(23A) | 0.9500    |
| C(23A)-C(24A) | 1.389(6)  | C(23B)-H(23B) | 0.9500    |
| C(23B)-C(24B) | 1.387(15) | C(24A)-H(24A) | 0.9500    |
| C(24B)-H(24B) | 0.9500    | C(25)-C(26)   | 1.378(4)  |
| C(25)-C(30)   | 1.384(4)  | C(26)-H(26)   | 0.9500    |
| C(26)-C(27)   | 1.389(5)  | C(27)-H(27)   | 0.9500    |
| C(27)-C(28)   | 1.380(5)  | C(28)-H(28)   | 0.9500    |
| C(28)-C(29)   | 1.379(5)  | C(29)-H(29)   | 0.9500    |
| C(29)-C(30)   | 1.386(4)  | C(30)-H(30)   | 0.9500    |
| C(31)-C(32)   | 1.383(4)  | C(31)-C(36)   | 1.390(4)  |
| C(32)-H(32)   | 0.9500    | C(32)-C(33)   | 1.390(4)  |
| C(33)-H(33)   | 0.9500    | C(33)-C(34)   | 1.383(4)  |

|                   |            |                   |            |
|-------------------|------------|-------------------|------------|
| C(34)-H(34)       | 0.9500     | C(34)-C(35)       | 1.384(4)   |
| C(35)-H(35)       | 0.9500     | C(35)-C(36)       | 1.383(4)   |
| C(36)-H(36)       | 0.9500     | C(41)-C(42)       | 1.404(3)   |
| C(41)-C(46)       | 1.410(4)   | C(41)-B(1)        | 1.639(4)   |
| C(42)-H(42)       | 0.9500     | C(42)-C(43)       | 1.398(4)   |
| C(43)-C(44)       | 1.373(4)   | C(43)-C(47)       | 1.495(4)   |
| C(44)-H(44)       | 0.9500     | C(44)-C(45)       | 1.391(4)   |
| C(45)-C(46)       | 1.386(4)   | C(45)-C(48)       | 1.509(5)   |
| C(46)-H(46)       | 0.9500     | C(49)-C(50)       | 1.400(4)   |
| C(49)-C(54)       | 1.410(3)   | C(49)-B(1)        | 1.653(4)   |
| C(50)-H(50)       | 0.9500     | C(50)-C(51)       | 1.397(4)   |
| C(51)-C(52)       | 1.382(4)   | C(51)-C(55)       | 1.496(4)   |
| C(52)-H(52)       | 0.9500     | C(52)-C(53)       | 1.387(4)   |
| C(53)-C(54)       | 1.389(4)   | C(53)-C(56)       | 1.497(4)   |
| C(54)-H(54)       | 0.9500     | C(57)-C(58)       | 1.399(4)   |
| C(57)-C(62)       | 1.404(4)   | C(57)-B(1)        | 1.657(4)   |
| C(58)-H(58)       | 0.9500     | C(58)-C(59)       | 1.395(4)   |
| C(59)-C(60)       | 1.386(4)   | C(59)-C(63)       | 1.493(4)   |
| C(60)-H(60)       | 0.9500     | C(60)-C(61)       | 1.381(4)   |
| C(61)-C(62)       | 1.391(4)   | C(61)-C(64)       | 1.493(4)   |
| C(62)-H(62)       | 0.9500     | C(65)-C(66)       | 1.404(3)   |
| C(65)-C(70)       | 1.396(4)   | C(65)-B(1)        | 1.640(4)   |
| C(66)-H(66)       | 0.9500     | C(66)-C(67)       | 1.390(3)   |
| C(67)-C(68)       | 1.388(4)   | C(67)-C(71)       | 1.488(4)   |
| C(68)-H(68)       | 0.9500     | C(68)-C(69)       | 1.377(4)   |
| C(69)-C(70)       | 1.398(4)   | C(69)-C(72)       | 1.494(4)   |
| C(70)-H(70)       | 0.9500     |                   |            |
| Cl(1)-Bi(1)-Cl(3) | 179.25(2)  | C(1)-Bi(1)-Cl(1)  | 93.53(7)   |
| C(1)-Bi(1)-Cl(3)  | 87.09(7)   | C(7)-Bi(1)-Cl(1)  | 94.22(7)   |
| C(7)-Bi(1)-Cl(3)  | 85.90(7)   | C(7)-Bi(1)-C(1)   | 115.63(10) |
| C(7)-Bi(1)-C(13)  | 123.94(10) | C(13)-Bi(1)-Cl(1) | 92.44(7)   |
| C(13)-Bi(1)-Cl(3) | 86.88(7)   | C(13)-Bi(1)-C(1)  | 119.38(9)  |
| Cl(2)-Bi(2)-Cl(3) | 177.70(2)  | C(19)-Bi(2)-Cl(2) | 95.06(8)   |
| C(19)-Bi(2)-Cl(3) | 83.90(8)   | C(19)-Bi(2)-C(25) | 115.09(10) |
| C(25)-Bi(2)-Cl(2) | 93.91(8)   | C(25)-Bi(2)-Cl(3) | 88.39(7)   |
| C(31)-Bi(2)-Cl(2) | 92.99(7)   | C(31)-Bi(2)-Cl(3) | 85.84(7)   |
| C(31)-Bi(2)-C(19) | 122.14(11) | C(31)-Bi(2)-C(25) | 121.35(10) |

|                      |            |                      |            |
|----------------------|------------|----------------------|------------|
| Bi(1)-Cl(3)-Bi(2)    | 128.10(2)  | C(2)-C(1)-Bi(1)      | 117.84(19) |
| C(6)-C(1)-Bi(1)      | 119.68(19) | C(6)-C(1)-C(2)       | 122.3(3)   |
| C(1)-C(2)-H(2)       | 120.9      | C(1)-C(2)-C(3)       | 118.1(3)   |
| C(3)-C(2)-H(2)       | 120.9      | C(2)-C(3)-H(3)       | 119.8      |
| C(4)-C(3)-C(2)       | 120.5(3)   | C(4)-C(3)-H(3)       | 119.8      |
| C(3)-C(4)-H(4)       | 119.8      | C(5)-C(4)-C(3)       | 120.4(3)   |
| C(5)-C(4)-H(4)       | 119.8      | C(4)-C(5)-H(5)       | 119.9      |
| C(4)-C(5)-C(6)       | 120.1(3)   | C(6)-C(5)-H(5)       | 119.9      |
| C(1)-C(6)-C(5)       | 118.5(3)   | C(1)-C(6)-H(6)       | 120.8      |
| C(5)-C(6)-H(6)       | 120.8      | C(8)-C(7)-Bi(1)      | 119.0(2)   |
| C(12)-C(7)-Bi(1)     | 118.6(2)   | C(12)-C(7)-C(8)      | 122.3(3)   |
| C(7)-C(8)-H(8)       | 121.0      | C(7)-C(8)-C(9)       | 118.0(3)   |
| C(9)-C(8)-H(8)       | 121.0      | C(8)-C(9)-H(9)       | 119.7      |
| C(10)-C(9)-C(8)      | 120.7(3)   | C(10)-C(9)-H(9)      | 119.7      |
| C(9)-C(10)-H(10)     | 119.9      | C(11)-C(10)-C(9)     | 120.3(3)   |
| C(11)-C(10)-H(10)    | 119.9      | C(10)-C(11)-H(11)    | 119.7      |
| C(10)-C(11)-C(12)    | 120.5(3)   | C(12)-C(11)-H(11)    | 119.7      |
| C(7)-C(12)-C(11)     | 118.2(3)   | C(7)-C(12)-H(12)     | 120.9      |
| C(11)-C(12)-H(12)    | 120.9      | C(14)-C(13)-Bi(1)    | 120.26(19) |
| C(14)-C(13)-C(18)    | 122.8(3)   | C(18)-C(13)-Bi(1)    | 116.9(2)   |
| C(13)-C(14)-H(14)    | 121.0      | C(13)-C(14)-C(15)    | 118.1(3)   |
| C(15)-C(14)-H(14)    | 121.0      | C(14)-C(15)-H(15)    | 119.8      |
| C(16)-C(15)-C(14)    | 120.3(3)   | C(16)-C(15)-H(15)    | 119.8      |
| C(15)-C(16)-H(16)    | 119.8      | C(15)-C(16)-C(17)    | 120.3(3)   |
| C(17)-C(16)-H(16)    | 119.8      | C(16)-C(17)-H(17)    | 119.8      |
| C(16)-C(17)-C(18)    | 120.4(3)   | C(18)-C(17)-H(17)    | 119.8      |
| C(13)-C(18)-C(17)    | 118.0(3)   | C(13)-C(18)-H(18)    | 121.0      |
| C(17)-C(18)-H(18)    | 121.0      | C(20A)-C(19)-Bi(2)   | 120.1(2)   |
| C(20A)-C(19)-C(24A)  | 125.7(3)   | C(20B)-C(19)-Bi(2)   | 125.0(5)   |
| C(20B)-C(19)-C(24B)  | 113.2(7)   | C(24A)-C(19)-Bi(2)   | 113.8(3)   |
| C(24B)-C(19)-Bi(2)   | 121.0(4)   | C(19)-C(20A)-H(20A)  | 121.6      |
| C(19)-C(20A)-C(21A)  | 116.8(4)   | C(21A)-C(20A)-H(20A) | 121.6      |
| C(19)-C(20B)-H(20B)  | 117.4      | C(19)-C(20B)-C(21B)  | 125.1(10)  |
| C(21B)-C(20B)-H(20B) | 117.4      | C(20A)-C(21A)-H(21A) | 118.6      |
| C(22)-C(21A)-C(20A)  | 122.9(5)   | C(22)-C(21A)-H(21A)  | 118.6      |
| C(20B)-C(21B)-H(21B) | 120.9      | C(22)-C(21B)-C(20B)  | 118.2(10)  |
| C(22)-C(21B)-H(21B)  | 120.9      | C(21A)-C(22)-H(22)   | 121.0      |
| C(21A)-C(22)-C(23A)  | 117.9(4)   | C(21B)-C(22)-H(22A)  | 117.3      |

|                      |          |                      |            |
|----------------------|----------|----------------------|------------|
| C(21B)-C(22)-C(23B)  | 125.4(8) | C(23A)-C(22)-H(22)   | 121.0      |
| C(23B)-C(22)-H(22A)  | 117.3    | C(22)-C(23A)-H(23A)  | 120.0      |
| C(24A)-C(23A)-C(22)  | 120.0(4) | C(24A)-C(23A)-H(23A) | 120.0      |
| C(22)-C(23B)-H(23B)  | 123.8    | C(24B)-C(23B)-C(22)  | 112.4(9)   |
| C(24B)-C(23B)-H(23B) | 123.8    | C(19)-C(24A)-C(23A)  | 116.3(4)   |
| C(19)-C(24A)-H(24A)  | 121.8    | C(23A)-C(24A)-H(24A) | 121.8      |
| C(19)-C(24B)-H(24B)  | 120.2    | C(23B)-C(24B)-C(19)  | 119.6(9)   |
| C(23B)-C(24B)-H(24B) | 120.2    | C(26)-C(25)-Bi(2)    | 118.8(2)   |
| C(26)-C(25)-C(30)    | 122.6(3) | C(30)-C(25)-Bi(2)    | 118.5(2)   |
| C(25)-C(26)-H(26)    | 120.9    | C(25)-C(26)-C(27)    | 118.2(3)   |
| C(27)-C(26)-H(26)    | 120.9    | C(26)-C(27)-H(27)    | 119.9      |
| C(28)-C(27)-C(26)    | 120.3(3) | C(28)-C(27)-H(27)    | 119.9      |
| C(27)-C(28)-H(28)    | 119.8    | C(29)-C(28)-C(27)    | 120.4(3)   |
| C(29)-C(28)-H(28)    | 119.8    | C(28)-C(29)-H(29)    | 119.8      |
| C(28)-C(29)-C(30)    | 120.5(3) | C(30)-C(29)-H(29)    | 119.8      |
| C(25)-C(30)-C(29)    | 118.0(3) | C(25)-C(30)-H(30)    | 121.0      |
| C(29)-C(30)-H(30)    | 121.0    | C(32)-C(31)-Bi(2)    | 118.63(19) |
| C(32)-C(31)-C(36)    | 122.4(2) | C(36)-C(31)-Bi(2)    | 118.96(19) |
| C(31)-C(32)-H(32)    | 120.9    | C(31)-C(32)-C(33)    | 118.1(3)   |
| C(33)-C(32)-H(32)    | 120.9    | C(32)-C(33)-H(33)    | 119.8      |
| C(34)-C(33)-C(32)    | 120.5(3) | C(34)-C(33)-H(33)    | 119.8      |
| C(33)-C(34)-H(34)    | 119.8    | C(33)-C(34)-C(35)    | 120.3(3)   |
| C(35)-C(34)-H(34)    | 119.8    | C(34)-C(35)-H(35)    | 119.8      |
| C(36)-C(35)-C(34)    | 120.4(3) | C(36)-C(35)-H(35)    | 119.8      |
| C(31)-C(36)-H(36)    | 120.8    | C(35)-C(36)-C(31)    | 118.3(3)   |
| C(35)-C(36)-H(36)    | 120.8    | C(42)-C(41)-C(46)    | 114.9(2)   |
| C(42)-C(41)-B(1)     | 123.1(2) | C(46)-C(41)-B(1)     | 121.7(2)   |
| C(41)-C(42)-H(42)    | 118.9    | C(43)-C(42)-C(41)    | 122.3(3)   |
| C(43)-C(42)-H(42)    | 118.9    | C(42)-C(43)-C(47)    | 119.5(3)   |
| C(44)-C(43)-C(42)    | 121.2(3) | C(44)-C(43)-C(47)    | 119.3(3)   |
| C(43)-C(44)-H(44)    | 121.0    | C(43)-C(44)-C(45)    | 118.1(3)   |
| C(45)-C(44)-H(44)    | 121.0    | C(44)-C(45)-C(48)    | 119.5(3)   |
| C(46)-C(45)-C(44)    | 120.8(3) | C(46)-C(45)-C(48)    | 119.6(3)   |
| C(41)-C(46)-H(46)    | 118.7    | C(45)-C(46)-C(41)    | 122.6(3)   |
| C(45)-C(46)-H(46)    | 118.7    | F(1A)-C(47)-F(2A)    | 107.2(7)   |
| F(1A)-C(47)-F(3A)    | 106.1(4) | F(1A)-C(47)-C(43)    | 114.2(3)   |
| F(1B)-C(47)-F(3B)    | 108.4(6) | F(1B)-C(47)-C(43)    | 112.3(6)   |
| F(2A)-C(47)-F(3A)    | 106.7(8) | F(2A)-C(47)-C(43)    | 111.2(6)   |

|                     |           |                     |           |
|---------------------|-----------|---------------------|-----------|
| F(2B)-C(47)-F(1B)   | 112.7(13) | F(2B)-C(47)-F(3B)   | 100.4(12) |
| F(2B)-C(47)-C(43)   | 112.4(12) | F(2C)-C(47)-F(1C)   | 97.3(12)  |
| F(2C)-C(47)-F(3C)   | 115.9(14) | F(2C)-C(47)-C(43)   | 116.6(13) |
| F(3A)-C(47)-C(43)   | 111.1(3)  | F(3B)-C(47)-C(43)   | 109.9(4)  |
| F(3C)-C(47)-F(1C)   | 98.8(6)   | F(3C)-C(47)-C(43)   | 114.1(5)  |
| C(43)-C(47)-F(1C)   | 110.9(4)  | F(4)-C(48)-F(6)     | 106.8(4)  |
| F(4)-C(48)-C(45)    | 111.6(3)  | F(5)-C(48)-F(4)     | 110.3(4)  |
| F(5)-C(48)-F(6)     | 101.2(4)  | F(5)-C(48)-C(45)    | 115.1(3)  |
| F(6)-C(48)-C(45)    | 111.1(4)  | C(50)-C(49)-C(54)   | 115.4(2)  |
| C(50)-C(49)-B(1)    | 123.8(2)  | C(54)-C(49)-B(1)    | 120.8(2)  |
| C(49)-C(50)-H(50)   | 118.8     | C(51)-C(50)-C(49)   | 122.4(2)  |
| C(51)-C(50)-H(50)   | 118.8     | C(50)-C(51)-C(55)   | 120.2(3)  |
| C(52)-C(51)-C(50)   | 120.8(2)  | C(52)-C(51)-C(55)   | 119.0(2)  |
| C(51)-C(52)-H(52)   | 120.9     | C(51)-C(52)-C(53)   | 118.2(2)  |
| C(53)-C(52)-H(52)   | 120.9     | C(52)-C(53)-C(54)   | 120.9(2)  |
| C(52)-C(53)-C(56)   | 118.3(2)  | C(54)-C(53)-C(56)   | 120.8(3)  |
| C(49)-C(54)-H(54)   | 118.9     | C(53)-C(54)-C(49)   | 122.2(2)  |
| C(53)-C(54)-H(54)   | 118.9     | F(7A)-C(55)-F(8A)   | 105.0(6)  |
| F(7A)-C(55)-C(51)   | 112.4(4)  | F(7B)-C(55)-C(51)   | 107.5(8)  |
| F(7C)-C(55)-F(8C)   | 108.3(8)  | F(7C)-C(55)-F(9C)   | 103.5(7)  |
| F(7C)-C(55)-C(51)   | 114.8(6)  | F(8A)-C(55)-C(51)   | 111.8(3)  |
| F(8B)-C(55)-F(7B)   | 106.6(11) | F(8B)-C(55)-F(9B)   | 112.6(9)  |
| F(8B)-C(55)-C(51)   | 114.2(9)  | F(8C)-C(55)-F(9C)   | 101.0(8)  |
| F(8C)-C(55)-C(51)   | 117.0(7)  | F(9A)-C(55)-F(7A)   | 108.5(5)  |
| F(9A)-C(55)-F(8A)   | 105.7(5)  | F(9A)-C(55)-C(51)   | 113.0(3)  |
| F(9B)-C(55)-F(7B)   | 103.9(8)  | F(9B)-C(55)-C(51)   | 111.2(6)  |
| F(9C)-C(55)-C(51)   | 110.5(6)  | F(10A)-C(56)-F(11A) | 103.5(5)  |
| F(10A)-C(56)-C(53)  | 113.1(4)  | F(10B)-C(56)-C(53)  | 107.3(6)  |
| F(10C)-C(56)-F(11C) | 108.9(8)  | F(10C)-C(56)-F(12C) | 104.0(7)  |
| F(10C)-C(56)-C(53)  | 116.7(5)  | F(11A)-C(56)-C(53)  | 110.6(3)  |
| F(11B)-C(56)-F(10B) | 109.9(8)  | F(11B)-C(56)-F(12B) | 109.4(6)  |
| F(11B)-C(56)-C(53)  | 115.3(5)  | F(11C)-C(56)-F(12C) | 104.2(7)  |
| F(11C)-C(56)-C(53)  | 110.7(6)  | F(12A)-C(56)-F(10A) | 107.4(5)  |
| F(12A)-C(56)-F(11A) | 107.4(4)  | F(12A)-C(56)-C(53)  | 114.2(3)  |
| F(12B)-C(56)-F(10B) | 101.5(7)  | F(12B)-C(56)-C(53)  | 112.6(5)  |
| F(12C)-C(56)-C(53)  | 111.4(5)  | C(58)-C(57)-C(62)   | 114.9(2)  |
| C(58)-C(57)-B(1)    | 124.2(2)  | C(62)-C(57)-B(1)    | 120.6(2)  |
| C(57)-C(58)-H(58)   | 118.8     | C(59)-C(58)-C(57)   | 122.3(3)  |

|                     |           |                     |           |
|---------------------|-----------|---------------------|-----------|
| C(59)-C(58)-H(58)   | 118.8     | C(58)-C(59)-C(63)   | 119.0(3)  |
| C(60)-C(59)-C(58)   | 121.4(3)  | C(60)-C(59)-C(63)   | 119.6(3)  |
| C(59)-C(60)-H(60)   | 121.3     | C(61)-C(60)-C(59)   | 117.3(3)  |
| C(61)-C(60)-H(60)   | 121.3     | C(60)-C(61)-C(62)   | 121.2(3)  |
| C(60)-C(61)-C(64)   | 120.2(3)  | C(62)-C(61)-C(64)   | 118.5(3)  |
| C(57)-C(62)-H(62)   | 118.7     | C(61)-C(62)-C(57)   | 122.7(2)  |
| C(61)-C(62)-H(62)   | 118.7     | F(13A)-C(63)-F(14A) | 106.6(4)  |
| F(13A)-C(63)-F(15A) | 105.5(4)  | F(13A)-C(63)-C(59)  | 112.4(3)  |
| F(13B)-C(63)-C(59)  | 112.4(5)  | F(13C)-C(63)-F(15C) | 104.8(6)  |
| F(13C)-C(63)-F(40)  | 109.4(7)  | F(13C)-C(63)-C(59)  | 111.5(4)  |
| F(14A)-C(63)-F(15A) | 108.8(4)  | F(14A)-C(63)-C(59)  | 111.7(3)  |
| F(14C)-C(63)-F(13B) | 102.2(6)  | F(14C)-C(63)-F(15B) | 107.8(9)  |
| F(14C)-C(63)-C(59)  | 114.9(5)  | F(15A)-C(63)-C(59)  | 111.6(3)  |
| F(15B)-C(63)-F(13B) | 103.2(8)  | F(15B)-C(63)-C(59)  | 114.9(7)  |
| F(15C)-C(63)-F(40)  | 104.3(6)  | F(15C)-C(63)-C(59)  | 114.3(5)  |
| F(40)-C(63)-C(59)   | 112.1(5)  | F(16A)-C(64)-C(61)  | 110.2(4)  |
| F(16B)-C(64)-F(17B) | 114.1(10) | F(16B)-C(64)-F(18B) | 102.3(11) |
| F(16B)-C(64)-C(61)  | 114.3(10) | F(16C)-C(64)-F(17C) | 100.3(10) |
| F(16C)-C(64)-F(18C) | 109.3(10) | F(16C)-C(64)-C(61)  | 115.2(9)  |
| F(17A)-C(64)-F(16A) | 106.9(7)  | F(17A)-C(64)-C(61)  | 113.3(4)  |
| F(17B)-C(64)-F(18B) | 103.8(9)  | F(17B)-C(64)-C(61)  | 108.8(7)  |
| F(17C)-C(64)-C(61)  | 113.4(7)  | F(18A)-C(64)-F(16A) | 106.3(7)  |
| F(18A)-C(64)-F(17A) | 106.0(5)  | F(18A)-C(64)-C(61)  | 113.7(4)  |
| F(18B)-C(64)-C(61)  | 112.9(8)  | F(18C)-C(64)-F(17C) | 109.7(9)  |
| F(18C)-C(64)-C(61)  | 108.6(8)  | C(66)-C(65)-B(1)    | 121.2(2)  |
| C(70)-C(65)-C(66)   | 115.6(2)  | C(70)-C(65)-B(1)    | 122.9(2)  |
| C(65)-C(66)-H(66)   | 118.9     | C(67)-C(66)-C(65)   | 122.2(2)  |
| C(67)-C(66)-H(66)   | 118.9     | C(66)-C(67)-C(71)   | 119.9(2)  |
| C(68)-C(67)-C(66)   | 121.0(2)  | C(68)-C(67)-C(71)   | 119.0(2)  |
| C(67)-C(68)-H(68)   | 121.1     | C(69)-C(68)-C(67)   | 117.8(2)  |
| C(69)-C(68)-H(68)   | 121.1     | C(68)-C(69)-C(70)   | 121.2(3)  |
| C(68)-C(69)-C(72)   | 118.4(3)  | C(70)-C(69)-C(72)   | 120.4(3)  |
| C(65)-C(70)-C(69)   | 122.1(3)  | C(65)-C(70)-H(70)   | 118.9     |
| C(69)-C(70)-H(70)   | 118.9     | F(19A)-C(71)-C(67)  | 113.3(3)  |
| F(19B)-C(71)-F(20B) | 105.4(7)  | F(19B)-C(71)-C(67)  | 115.5(7)  |
| F(19C)-C(71)-F(20C) | 112.4(6)  | F(19C)-C(71)-F(21C) | 110.0(9)  |
| F(19C)-C(71)-C(67)  | 112.3(6)  | F(20A)-C(71)-F(19A) | 107.9(4)  |
| F(20A)-C(71)-F(21A) | 98.7(4)   | F(20A)-C(71)-C(67)  | 113.7(3)  |



|                     |            |                     |          |
|---------------------|------------|---------------------|----------|
| F(20B)-C(71)-C(67)  | 112.7(4)   | F(20C)-C(71)-F(21C) | 101.1(7) |
| F(20C)-C(71)-C(67)  | 111.9(4)   | F(21A)-C(71)-F(19A) | 113.0(4) |
| F(21A)-C(71)-C(67)  | 109.4(4)   | F(21B)-C(71)-F(19B) | 80.6(9)  |
| F(21B)-C(71)-F(20B) | 120.3(8)   | F(21B)-C(71)-C(67)  | 117.3(5) |
| F(21C)-C(71)-C(67)  | 108.6(7)   | F(22A)-C(72)-F(23A) | 108.6(5) |
| F(22A)-C(72)-F(24A) | 100.6(5)   | F(22A)-C(72)-C(69)  | 114.3(4) |
| F(22C)-C(72)-F(23C) | 107.8(7)   | F(22C)-C(72)-C(69)  | 110.8(6) |
| F(23A)-C(72)-C(69)  | 109.8(4)   | F(23B)-C(72)-F(22B) | 87.9(6)  |
| F(23B)-C(72)-F(24B) | 117.0(7)   | F(23B)-C(72)-C(69)  | 122.7(5) |
| F(23C)-C(72)-C(69)  | 107.7(6)   | F(24A)-C(72)-F(23A) | 107.6(4) |
| F(24A)-C(72)-C(69)  | 115.3(3)   | F(24B)-C(72)-F(22B) | 112.4(6) |
| F(24B)-C(72)-C(69)  | 107.3(5)   | F(24C)-C(72)-F(22C) | 102.9(8) |
| F(24C)-C(72)-F(23C) | 109.4(7)   | F(24C)-C(72)-C(69)  | 117.9(6) |
| C(69)-C(72)-F(22B)  | 107.4(5)   | C(41)-B(1)-C(49)    | 111.4(2) |
| C(41)-B(1)-C(57)    | 109.4(2)   | C(41)-B(1)-C(65)    | 108.8(2) |
| C(49)-B(1)-C(57)    | 106.48(19) | C(65)-B(1)-C(49)    | 110.9(2) |
| C(65)-B(1)-C(57)    | 109.7(2)   |                     |          |

---

9.7 Single crystal structure analysis of ( $\mu$ -chloro)-hexakis(3,5-di-*t*-butylphenyl)-dichloro-di-bismuth tetrakis(3,5-bis(trifluoromethyl)phenyl)borate (**11**)

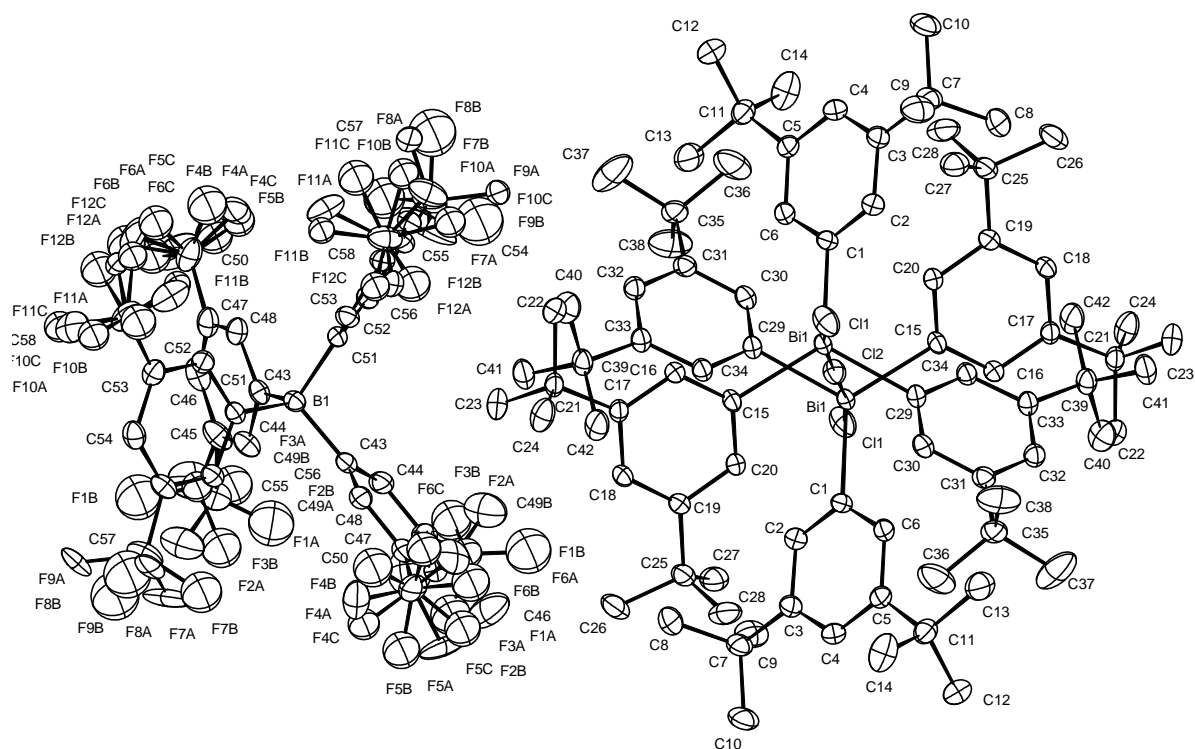

**Figure S26:** The solid state structure of **11**. H atoms have been removed for clarity and disordered parts shown in grey.

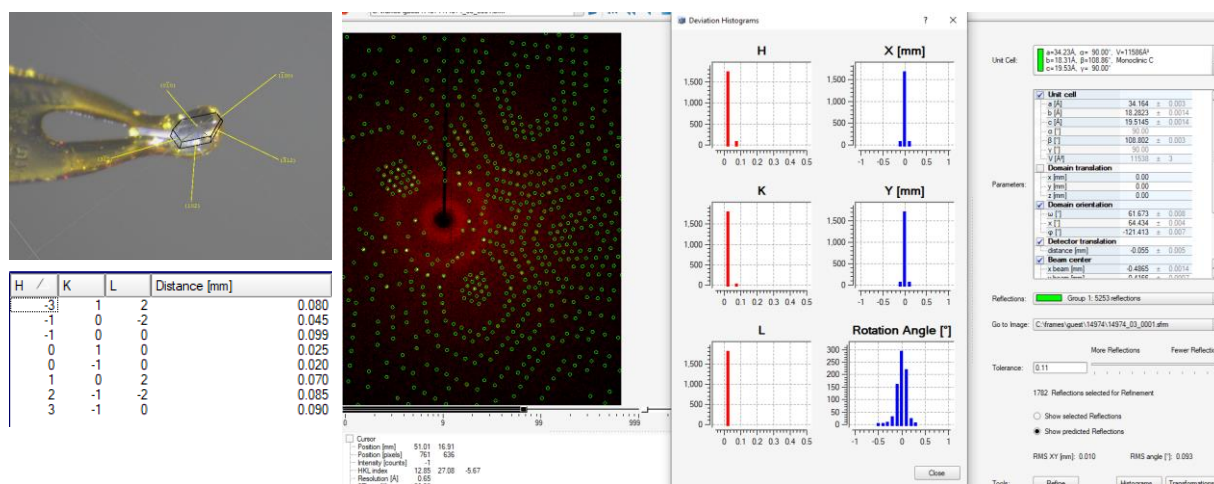

Figure S27: Crystal faces and unit cell determination/refinement of 11.

INTENSITY STATISTICS FOR DATASET # 1 14974sadabs.raw

| Resolution  | #Data | #Theory | %Complete | Redundancy | Mean I | Mean I/s | Rmerge | Rsigma |
|-------------|-------|---------|-----------|------------|--------|----------|--------|--------|
| Inf - 2.86  | 283   | 289     | 97.9      | 35.33      | 95.42  | 64.49    | 0.0405 | 0.0249 |
| 2.86 - 1.90 | 661   | 661     | 100.0     | 45.06      | 73.96  | 72.13    | 0.0380 | 0.0173 |
| 1.90 - 1.50 | 948   | 948     | 100.0     | 49.22      | 45.64  | 66.60    | 0.0442 | 0.0109 |
| 1.50 - 1.31 | 929   | 929     | 100.0     | 47.68      | 34.73  | 58.43    | 0.0562 | 0.0119 |
| 1.31 - 1.19 | 934   | 934     | 100.0     | 42.46      | 28.99  | 49.97    | 0.0657 | 0.0139 |
| 1.19 - 1.10 | 981   | 981     | 100.0     | 36.54      | 23.18  | 41.91    | 0.0761 | 0.0165 |
| 1.10 - 1.03 | 1006  | 1006    | 100.0     | 33.86      | 21.42  | 37.76    | 0.0831 | 0.0184 |
| 1.03 - 0.98 | 912   | 912     | 100.0     | 31.20      | 16.74  | 32.12    | 0.0987 | 0.0219 |
| 0.98 - 0.94 | 888   | 888     | 100.0     | 30.42      | 15.36  | 29.55    | 0.1071 | 0.0237 |
| 0.94 - 0.90 | 1029  | 1029    | 100.0     | 29.28      | 13.68  | 27.09    | 0.1172 | 0.0264 |
| 0.90 - 0.87 | 896   | 896     | 100.0     | 27.41      | 11.85  | 23.31    | 0.1321 | 0.0304 |
| 0.87 - 0.84 | 1033  | 1033    | 100.0     | 27.55      | 10.27  | 21.33    | 0.1467 | 0.0338 |
| 0.84 - 0.82 | 810   | 810     | 100.0     | 27.22      | 9.45   | 19.99    | 0.1585 | 0.0367 |
| 0.82 - 0.79 | 1313  | 1313    | 100.0     | 26.12      | 8.53   | 17.78    | 0.1726 | 0.0414 |
| 0.79 - 0.77 | 994   | 994     | 100.0     | 23.78      | 8.13   | 15.90    | 0.1828 | 0.0475 |
| 0.77 - 0.76 | 542   | 542     | 100.0     | 23.57      | 6.64   | 13.64    | 0.2097 | 0.0558 |
| 0.76 - 0.74 | 1155  | 1155    | 100.0     | 23.11      | 6.80   | 13.41    | 0.2101 | 0.0567 |
| 0.74 - 0.73 | 634   | 634     | 100.0     | 22.74      | 6.39   | 12.56    | 0.2257 | 0.0618 |
| 0.73 - 0.71 | 1367  | 1367    | 100.0     | 22.00      | 5.62   | 10.85    | 0.2477 | 0.0713 |
| 0.71 - 0.70 | 752   | 752     | 100.0     | 19.91      | 5.38   | 9.61     | 0.2647 | 0.0810 |
| 0.70 - 0.69 | 691   | 717     | 96.4      | 17.22      | 4.91   | 8.12     | 0.2945 | 0.1101 |
| -----       |       |         |           |            |        |          |        |        |
| 0.79 - 0.69 | 6135  | 6161    | 99.6      | 21.90      | 6.31   | 12.12    | 0.2241 | 0.0653 |
| Inf - 0.69  | 18758 | 18790   | 99.8      | 30.36      | 18.37  | 29.28    | 0.0818 | 0.0247 |

Complete .cif-data of the compound are available under the CCDC number CCDC-2296786.

**Table S14. Crystal data and structure refinement.**

|                                         |                                                                    |                              |
|-----------------------------------------|--------------------------------------------------------------------|------------------------------|
| Identification code                     | 14974                                                              |                              |
| Empirical formula                       | $C_{116} H_{138} B Bi_2 Cl_3 F_{24}$                               |                              |
| Color                                   | colourless                                                         |                              |
| Formula weight                          | $2523.38 \text{ g}\cdot\text{mol}^{-1}$                            |                              |
| Temperature                             | 100(2) K                                                           |                              |
| Wavelength                              | 0.71073 Å                                                          |                              |
| Crystal system                          | Monoclinic                                                         |                              |
| Space group                             | $C2/c$ , (no. 15)                                                  |                              |
| Unit cell dimensions                    | $a = 34.1234(13) \text{ Å}$                                        | $\alpha = 90^\circ$ .        |
|                                         | $b = 18.2693(7) \text{ Å}$                                         | $\beta = 108.812(2)^\circ$ . |
|                                         | $c = 19.4972(8) \text{ Å}$                                         | $\gamma = 90^\circ$ .        |
| Volume                                  | $11505.5(8) \text{ Å}^3$                                           |                              |
| Z                                       | 4                                                                  |                              |
| Density (calculated)                    | $1.457 \text{ Mg}\cdot\text{m}^{-3}$                               |                              |
| Absorption coefficient                  | $3.209 \text{ mm}^{-1}$                                            |                              |
| F(000)                                  | 5088 e                                                             |                              |
| Crystal size                            | $0.288 \times 0.140 \times 0.050 \text{ mm}^3$                     |                              |
| $\theta$ range for data collection      | $2.160$ to $30.508^\circ$ .                                        |                              |
| Index ranges                            | $-48 \leq h \leq 48$ , $-26 \leq k \leq 26$ , $-27 \leq l \leq 27$ |                              |
| Reflections collected                   | 549469                                                             |                              |
| Independent reflections                 | 17558 [ $R_{\text{int}} = 0.0832$ ]                                |                              |
| Reflections with $I > 2\sigma(I)$       | 15018                                                              |                              |
| Completeness to $\theta = 25.242^\circ$ | 100.0 %                                                            |                              |
| Absorption correction                   | Semi-empirical from equivalents                                    |                              |
| Max. and min. transmission              | 0.8626 and 0.6094                                                  |                              |
| Refinement method                       | Full-matrix least-squares on $F^2$                                 |                              |
| Data / restraints / parameters          | 17558 / 71 / 754                                                   |                              |
| Goodness-of-fit on $F^2$                | 1.043                                                              |                              |
| Final R indices [ $I > 2\sigma(I)$ ]    | $R_1 = 0.0301$                                                     | $wR^2 = 0.0739$              |
| R indices (all data)                    | $R_1 = 0.0394$                                                     | $wR^2 = 0.0796$              |
| Extinction coefficient                  | n/a                                                                |                              |
| Largest diff. peak and hole             | $1.741$ and $-1.087 \text{ e}\cdot\text{Å}^{-3}$                   |                              |

**Table S15. Bond lengths [Å] and angles [°].**

---

|              |           |              |             |
|--------------|-----------|--------------|-------------|
| Bi(1)-Cl(1)  | 2.4857(7) | Bi(1)-Cl(2)  | 2.80068(13) |
| Bi(1)-C(1)   | 2.194(2)  | Bi(1)-C(15)  | 2.195(2)    |
| Bi(1)-C(29)  | 2.188(2)  | C(1)-C(2)    | 1.377(4)    |
| C(1)-C(6)    | 1.388(4)  | C(2)-H(2)    | 0.9500      |
| C(2)-C(3)    | 1.403(4)  | C(3)-C(4)    | 1.390(4)    |
| C(3)-C(7)    | 1.534(4)  | C(4)-H(4)    | 0.9500      |
| C(4)-C(5)    | 1.409(4)  | C(5)-C(6)    | 1.392(4)    |
| C(5)-C(11)   | 1.546(4)  | C(6)-H(6)    | 0.9500      |
| C(7)-C(8)    | 1.533(4)  | C(7)-C(9)    | 1.536(5)    |
| C(7)-C(10)   | 1.536(4)  | C(8)-H(8A)   | 0.9800      |
| C(8)-H(8B)   | 0.9800    | C(8)-H(8C)   | 0.9800      |
| C(9)-H(9A)   | 0.9800    | C(9)-H(9B)   | 0.9800      |
| C(9)-H(9C)   | 0.9800    | C(10)-H(10A) | 0.9800      |
| C(10)-H(10B) | 0.9800    | C(10)-H(10C) | 0.9800      |
| C(11)-C(12)  | 1.530(4)  | C(11)-C(13)  | 1.529(4)    |
| C(11)-C(14)  | 1.537(4)  | C(12)-H(12A) | 0.9800      |
| C(12)-H(12B) | 0.9800    | C(12)-H(12C) | 0.9800      |
| C(13)-H(13A) | 0.9800    | C(13)-H(13B) | 0.9800      |
| C(13)-H(13C) | 0.9800    | C(14)-H(14A) | 0.9800      |
| C(14)-H(14B) | 0.9800    | C(14)-H(14C) | 0.9800      |
| C(15)-C(16)  | 1.398(3)  | C(15)-C(20)  | 1.375(4)    |
| C(16)-H(16)  | 0.9500    | C(16)-C(17)  | 1.395(3)    |
| C(17)-C(18)  | 1.400(4)  | C(17)-C(21)  | 1.532(3)    |
| C(18)-H(18)  | 0.9500    | C(18)-C(19)  | 1.391(3)    |
| C(19)-C(20)  | 1.405(3)  | C(19)-C(25)  | 1.530(4)    |
| C(20)-H(20)  | 0.9500    | C(21)-C(22)  | 1.524(4)    |
| C(21)-C(23)  | 1.534(4)  | C(21)-C(24)  | 1.528(4)    |
| C(22)-H(22A) | 0.9800    | C(22)-H(22B) | 0.9800      |
| C(22)-H(22C) | 0.9800    | C(23)-H(23A) | 0.9800      |
| C(23)-H(23B) | 0.9800    | C(23)-H(23C) | 0.9800      |
| C(24)-H(24A) | 0.9800    | C(24)-H(24B) | 0.9800      |
| C(24)-H(24C) | 0.9800    | C(25)-C(26)  | 1.536(4)    |
| C(25)-C(27)  | 1.533(4)  | C(25)-C(28)  | 1.530(4)    |
| C(26)-H(26A) | 0.9800    | C(26)-H(26B) | 0.9800      |
| C(26)-H(26C) | 0.9800    | C(27)-H(27A) | 0.9800      |
| C(27)-H(27B) | 0.9800    | C(27)-H(27C) | 0.9800      |

|              |           |              |           |
|--------------|-----------|--------------|-----------|
| C(28)-H(28A) | 0.9800    | C(28)-H(28B) | 0.9800    |
| C(28)-H(28C) | 0.9800    | C(29)-C(30)  | 1.377(4)  |
| C(29)-C(34)  | 1.385(3)  | C(30)-H(30)  | 0.9500    |
| C(30)-C(31)  | 1.399(4)  | C(31)-C(32)  | 1.394(3)  |
| C(31)-C(35)  | 1.534(4)  | C(32)-H(32)  | 0.9500    |
| C(32)-C(33)  | 1.400(3)  | C(33)-C(34)  | 1.393(3)  |
| C(33)-C(39)  | 1.536(3)  | C(34)-H(34)  | 0.9500    |
| C(35)-C(36)  | 1.522(4)  | C(35)-C(37)  | 1.518(5)  |
| C(35)-C(38)  | 1.536(5)  | C(36)-H(36A) | 0.9800    |
| C(36)-H(36B) | 0.9800    | C(36)-H(36C) | 0.9800    |
| C(37)-H(37A) | 0.9800    | C(37)-H(37B) | 0.9800    |
| C(37)-H(37C) | 0.9800    | C(38)-H(38A) | 0.9800    |
| C(38)-H(38B) | 0.9800    | C(38)-H(38C) | 0.9800    |
| C(39)-C(40)  | 1.538(4)  | C(39)-C(41)  | 1.533(4)  |
| C(39)-C(42)  | 1.527(4)  | C(40)-H(40A) | 0.9800    |
| C(40)-H(40B) | 0.9800    | C(40)-H(40C) | 0.9800    |
| C(41)-H(41A) | 0.9800    | C(41)-H(41B) | 0.9800    |
| C(41)-H(41C) | 0.9800    | C(42)-H(42A) | 0.9800    |
| C(42)-H(42B) | 0.9800    | C(42)-H(42C) | 0.9800    |
| C(43)-C(44)  | 1.401(4)  | C(43)-C(48)  | 1.402(4)  |
| C(43)-B(1)   | 1.646(3)  | C(44)-H(44)  | 0.9500    |
| C(44)-C(45)  | 1.392(4)  | C(45)-C(46)  | 1.381(5)  |
| C(45)-C(49A) | 1.557(8)  | C(45)-C(49B) | 1.425(16) |
| C(46)-H(46)  | 0.9500    | C(46)-C(47)  | 1.380(4)  |
| C(47)-C(48)  | 1.391(4)  | C(47)-C(50)  | 1.500(4)  |
| C(48)-H(48)  | 0.9500    | C(50)-F(4A)  | 1.334(6)  |
| C(50)-F(5A)  | 1.372(6)  | C(50)-F(6A)  | 1.330(5)  |
| C(50)-F(4B)  | 1.395(13) | C(50)-F(5B)  | 1.297(12) |
| C(50)-F(6B)  | 1.306(13) | C(50)-F(4C)  | 1.270(12) |
| C(50)-F(5C)  | 1.318(15) | C(50)-F(6C)  | 1.323(13) |
| C(51)-C(52)  | 1.403(4)  | C(51)-C(56)  | 1.400(3)  |
| C(51)-B(1)   | 1.638(3)  | C(52)-H(52)  | 0.9500    |
| C(52)-C(53)  | 1.399(3)  | C(53)-C(54)  | 1.379(4)  |
| C(53)-C(58)  | 1.494(4)  | C(54)-H(54)  | 0.9500    |
| C(54)-C(55)  | 1.384(4)  | C(55)-C(56)  | 1.386(4)  |
| C(55)-C(57)  | 1.491(4)  | C(56)-H(56)  | 0.9500    |
| C(57)-F(7A)  | 1.266(4)  | C(57)-F(8A)  | 1.319(4)  |
| C(57)-F(9A)  | 1.423(4)  | C(57)-F(7B)  |           |

|                     |             |                     |            |
|---------------------|-------------|---------------------|------------|
| 1.3825(10)          | C(57)-F(8B) | 1.3790(10)          | C(57)-     |
| F(9B)               | 1.3786(10)  | C(58)-F(10A)        | 1.315(5)   |
| C(58)-F(11A)        | 1.405(6)    | C(58)-F(12A)        | 1.284(5)   |
| C(58)-F(10B)        | 1.3789(10)  | C(58)-F(11B)        | 1.3821(10) |
| C(58)-F(12B)        | 1.3791(10)  | C(58)-F(10C)        | 1.3824(10) |
| C(58)-F(11C)        | 1.3778(10)  | C(58)-F(12C)        | 1.3795(10) |
| F(1A)-C(49A)        | 1.297(11)   | F(2A)-C(49A)        | 1.296(9)   |
| F(3A)-C(49A)        | 1.313(8)    | F(1B)-C(49B)        | 1.261(16)  |
| F(2B)-C(49B)        | 1.391(16)   | F(3B)-C(49B)        | 1.409(16)  |
| Cl(1)-Bi(1)-Cl(2)   | 173.722(17) | C(1)-Bi(1)-Cl(1)    | 93.38(7)   |
| C(1)-Bi(1)-Cl(2)    | 87.21(7)    | C(1)-Bi(1)-C(15)    | 123.32(9)  |
| C(15)-Bi(1)-Cl(1)   | 96.00(7)    | C(15)-Bi(1)-Cl(2)   | 88.88(7)   |
| C(29)-Bi(1)-Cl(1)   | 91.23(7)    | C(29)-Bi(1)-Cl(2)   | 82.95(7)   |
| C(29)-Bi(1)-C(1)    | 116.80(9)   | C(29)-Bi(1)-C(15)   | 118.71(9)  |
| Bi(1)#1-Cl(2)-Bi(1) | 180.0       | C(2)-C(1)-Bi(1)     | 114.50(19) |
| C(2)-C(1)-C(6)      | 123.7(2)    | C(6)-C(1)-Bi(1)     | 121.76(18) |
| C(1)-C(2)-H(2)      | 120.5       | C(1)-C(2)-C(3)      | 119.1(2)   |
| C(3)-C(2)-H(2)      | 120.5       | C(2)-C(3)-C(7)      | 118.1(2)   |
| C(4)-C(3)-C(2)      | 117.5(2)    | C(4)-C(3)-C(7)      | 124.3(2)   |
| C(3)-C(4)-H(4)      | 118.4       | C(3)-C(4)-C(5)      | 123.3(2)   |
| C(5)-C(4)-H(4)      | 118.4       | C(4)-C(5)-C(11)     | 119.8(2)   |
| C(6)-C(5)-C(4)      | 118.2(2)    | C(6)-C(5)-C(11)     | 122.0(2)   |
| C(1)-C(6)-C(5)      | 118.3(2)    | C(1)-C(6)-H(6)      | 120.9      |
| C(5)-C(6)-H(6)      | 120.9       | C(3)-C(7)-C(9)      | 108.7(2)   |
| C(3)-C(7)-C(10)     | 111.9(2)    | C(8)-C(7)-C(3)      | 109.9(2)   |
| C(8)-C(7)-C(9)      | 109.1(3)    | C(8)-C(7)-C(10)     | 108.6(3)   |
| C(10)-C(7)-C(9)     | 108.7(3)    | C(7)-C(8)-H(8A)     | 109.5      |
| C(7)-C(8)-H(8B)     | 109.5       | C(7)-C(8)-H(8C)     | 109.5      |
| H(8A)-C(8)-H(8B)    | 109.5       | H(8A)-C(8)-H(8C)    | 109.5      |
| H(8B)-C(8)-H(8C)    | 109.5       | C(7)-C(9)-H(9A)     | 109.5      |
| C(7)-C(9)-H(9B)     | 109.5       | C(7)-C(9)-H(9C)     | 109.5      |
| H(9A)-C(9)-H(9B)    | 109.5       | H(9A)-C(9)-H(9C)    | 109.5      |
| H(9B)-C(9)-H(9C)    | 109.5       | C(7)-C(10)-H(10A)   | 109.5      |
| C(7)-C(10)-H(10B)   | 109.5       | C(7)-C(10)-H(10C)   | 109.5      |
| H(10A)-C(10)-H(10B) | 109.5       | H(10A)-C(10)-H(10C) | 109.5      |
| H(10B)-C(10)-H(10C) | 109.5       | C(12)-C(11)-C(5)    | 110.5(2)   |
| C(12)-C(11)-C(14)   | 108.8(3)    | C(13)-C(11)-C(5)    | 111.8(2)   |

|                     |            |                     |            |
|---------------------|------------|---------------------|------------|
| C(13)-C(11)-C(12)   | 108.2(2)   | C(13)-C(11)-C(14)   | 109.2(3)   |
| C(14)-C(11)-C(5)    | 108.3(2)   | C(11)-C(12)-H(12A)  | 109.5      |
| C(11)-C(12)-H(12B)  | 109.5      | C(11)-C(12)-H(12C)  | 109.5      |
| H(12A)-C(12)-H(12B) | 109.5      | H(12A)-C(12)-H(12C) | 109.5      |
| H(12B)-C(12)-H(12C) | 109.5      | C(11)-C(13)-H(13A)  | 109.5      |
| C(11)-C(13)-H(13B)  | 109.5      | C(11)-C(13)-H(13C)  | 109.5      |
| H(13A)-C(13)-H(13B) | 109.5      | H(13A)-C(13)-H(13C) | 109.5      |
| H(13B)-C(13)-H(13C) | 109.5      | C(11)-C(14)-H(14A)  | 109.5      |
| C(11)-C(14)-H(14B)  | 109.5      | C(11)-C(14)-H(14C)  | 109.5      |
| H(14A)-C(14)-H(14B) | 109.5      | H(14A)-C(14)-H(14C) | 109.5      |
| H(14B)-C(14)-H(14C) | 109.5      | C(16)-C(15)-Bi(1)   | 119.42(18) |
| C(20)-C(15)-Bi(1)   | 116.55(17) | C(20)-C(15)-C(16)   | 123.9(2)   |
| C(15)-C(16)-H(16)   | 121.0      | C(17)-C(16)-C(15)   | 118.0(2)   |
| C(17)-C(16)-H(16)   | 121.0      | C(16)-C(17)-C(18)   | 118.1(2)   |
| C(16)-C(17)-C(21)   | 122.3(2)   | C(18)-C(17)-C(21)   | 119.6(2)   |
| C(17)-C(18)-H(18)   | 118.2      | C(19)-C(18)-C(17)   | 123.6(2)   |
| C(19)-C(18)-H(18)   | 118.2      | C(18)-C(19)-C(20)   | 117.8(2)   |
| C(18)-C(19)-C(25)   | 123.0(2)   | C(20)-C(19)-C(25)   | 119.2(2)   |
| C(15)-C(20)-C(19)   | 118.6(2)   | C(15)-C(20)-H(20)   | 120.7      |
| C(19)-C(20)-H(20)   | 120.7      | C(17)-C(21)-C(23)   | 110.3(2)   |
| C(22)-C(21)-C(17)   | 112.1(2)   | C(22)-C(21)-C(23)   | 108.4(2)   |
| C(22)-C(21)-C(24)   | 108.8(3)   | C(24)-C(21)-C(17)   | 108.8(2)   |
| C(24)-C(21)-C(23)   | 108.3(2)   | C(21)-C(22)-H(22A)  | 109.5      |
| C(21)-C(22)-H(22B)  | 109.5      | C(21)-C(22)-H(22C)  | 109.5      |
| H(22A)-C(22)-H(22B) | 109.5      | H(22A)-C(22)-H(22C) | 109.5      |
| H(22B)-C(22)-H(22C) | 109.5      | C(21)-C(23)-H(23A)  | 109.5      |
| C(21)-C(23)-H(23B)  | 109.5      | C(21)-C(23)-H(23C)  | 109.5      |
| H(23A)-C(23)-H(23B) | 109.5      | H(23A)-C(23)-H(23C) | 109.5      |
| H(23B)-C(23)-H(23C) | 109.5      | C(21)-C(24)-H(24A)  | 109.5      |
| C(21)-C(24)-H(24B)  | 109.5      | C(21)-C(24)-H(24C)  | 109.5      |
| H(24A)-C(24)-H(24B) | 109.5      | H(24A)-C(24)-H(24C) | 109.5      |
| H(24B)-C(24)-H(24C) | 109.5      | C(19)-C(25)-C(26)   | 111.7(2)   |
| C(19)-C(25)-C(27)   | 109.8(2)   | C(19)-C(25)-C(28)   | 108.9(2)   |
| C(27)-C(25)-C(26)   | 107.2(3)   | C(28)-C(25)-C(26)   | 109.3(3)   |
| C(28)-C(25)-C(27)   | 109.9(2)   | C(25)-C(26)-H(26A)  | 109.5      |
| C(25)-C(26)-H(26B)  | 109.5      | C(25)-C(26)-H(26C)  | 109.5      |
| H(26A)-C(26)-H(26B) | 109.5      | H(26A)-C(26)-H(26C) | 109.5      |
| H(26B)-C(26)-H(26C) | 109.5      | C(25)-C(27)-H(27A)  | 109.5      |



|                     |          |                     |            |
|---------------------|----------|---------------------|------------|
| C(25)-C(27)-H(27B)  | 109.5    | C(25)-C(27)-H(27C)  | 109.5      |
| H(27A)-C(27)-H(27B) | 109.5    | H(27A)-C(27)-H(27C) | 109.5      |
| H(27B)-C(27)-H(27C) | 109.5    | C(25)-C(28)-H(28A)  | 109.5      |
| C(25)-C(28)-H(28B)  | 109.5    | C(25)-C(28)-H(28C)  | 109.5      |
| H(28A)-C(28)-H(28B) | 109.5    | H(28A)-C(28)-H(28C) | 109.5      |
| H(28B)-C(28)-H(28C) | 109.5    | C(30)-C(29)-Bi(1)   | 118.90(18) |
| C(30)-C(29)-C(34)   | 123.9(2) | C(34)-C(29)-Bi(1)   | 117.07(18) |
| C(29)-C(30)-H(30)   | 120.6    | C(29)-C(30)-C(31)   | 118.7(2)   |
| C(31)-C(30)-H(30)   | 120.6    | C(30)-C(31)-C(35)   | 120.3(2)   |
| C(32)-C(31)-C(30)   | 117.5(2) | C(32)-C(31)-C(35)   | 122.1(2)   |
| C(31)-C(32)-H(32)   | 118.2    | C(31)-C(32)-C(33)   | 123.6(2)   |
| C(33)-C(32)-H(32)   | 118.2    | C(32)-C(33)-C(39)   | 120.3(2)   |
| C(34)-C(33)-C(32)   | 117.9(2) | C(34)-C(33)-C(39)   | 121.8(2)   |
| C(29)-C(34)-C(33)   | 118.3(2) | C(29)-C(34)-H(34)   | 120.8      |
| C(33)-C(34)-H(34)   | 120.8    | C(31)-C(35)-C(38)   | 108.3(2)   |
| C(36)-C(35)-C(31)   | 110.8(3) | C(36)-C(35)-C(38)   | 108.1(3)   |
| C(37)-C(35)-C(31)   | 112.5(2) | C(37)-C(35)-C(36)   | 108.5(3)   |
| C(37)-C(35)-C(38)   | 108.5(3) | C(35)-C(36)-H(36A)  | 109.5      |
| C(35)-C(36)-H(36B)  | 109.5    | C(35)-C(36)-H(36C)  | 109.5      |
| H(36A)-C(36)-H(36B) | 109.5    | H(36A)-C(36)-H(36C) | 109.5      |
| H(36B)-C(36)-H(36C) | 109.5    | C(35)-C(37)-H(37A)  | 109.5      |
| C(35)-C(37)-H(37B)  | 109.5    | C(35)-C(37)-H(37C)  | 109.5      |
| H(37A)-C(37)-H(37B) | 109.5    | H(37A)-C(37)-H(37C) | 109.5      |
| H(37B)-C(37)-H(37C) | 109.5    | C(35)-C(38)-H(38A)  | 109.5      |
| C(35)-C(38)-H(38B)  | 109.5    | C(35)-C(38)-H(38C)  | 109.5      |
| H(38A)-C(38)-H(38B) | 109.5    | H(38A)-C(38)-H(38C) | 109.5      |
| H(38B)-C(38)-H(38C) | 109.5    | C(33)-C(39)-C(40)   | 108.1(2)   |
| C(41)-C(39)-C(33)   | 109.4(2) | C(41)-C(39)-C(40)   | 110.2(2)   |
| C(42)-C(39)-C(33)   | 112.0(2) | C(42)-C(39)-C(40)   | 109.0(2)   |
| C(42)-C(39)-C(41)   | 108.2(2) | C(39)-C(40)-H(40A)  | 109.5      |
| C(39)-C(40)-H(40B)  | 109.5    | C(39)-C(40)-H(40C)  | 109.5      |
| H(40A)-C(40)-H(40B) | 109.5    | H(40A)-C(40)-H(40C) | 109.5      |
| H(40B)-C(40)-H(40C) | 109.5    | C(39)-C(41)-H(41A)  | 109.5      |
| C(39)-C(41)-H(41B)  | 109.5    | C(39)-C(41)-H(41C)  | 109.5      |
| H(41A)-C(41)-H(41B) | 109.5    | H(41A)-C(41)-H(41C) | 109.5      |
| H(41B)-C(41)-H(41C) | 109.5    | C(39)-C(42)-H(42A)  | 109.5      |
| C(39)-C(42)-H(42B)  | 109.5    | C(39)-C(42)-H(42C)  | 109.5      |
| H(42A)-C(42)-H(42B) | 109.5    | H(42A)-C(42)-H(42C) | 109.5      |

|                     |          |                     |          |
|---------------------|----------|---------------------|----------|
| H(42B)-C(42)-H(42C) | 109.5    | C(44)-C(43)-C(48)   | 115.1(2) |
| C(44)-C(43)-B(1)    | 123.1(2) | C(48)-C(43)-B(1)    | 121.7(2) |
| C(43)-C(44)-H(44)   | 118.8    | C(45)-C(44)-C(43)   | 122.3(3) |
| C(45)-C(44)-H(44)   | 118.8    | C(44)-C(45)-C(49A)  | 116.6(4) |
| C(44)-C(45)-C(49B)  | 125.0(7) | C(46)-C(45)-C(44)   | 121.1(3) |
| C(46)-C(45)-C(49A)  | 121.9(4) | C(46)-C(45)-C(49B)  | 113.3(6) |
| C(45)-C(46)-H(46)   | 121.0    | C(47)-C(46)-C(45)   | 117.9(3) |
| C(47)-C(46)-H(46)   | 121.0    | C(46)-C(47)-C(48)   | 120.9(3) |
| C(46)-C(47)-C(50)   | 119.9(3) | C(48)-C(47)-C(50)   | 119.2(3) |
| C(43)-C(48)-H(48)   | 118.7    | C(47)-C(48)-C(43)   | 122.6(3) |
| C(47)-C(48)-H(48)   | 118.7    | F(4A)-C(50)-C(47)   | 112.6(3) |
| F(4A)-C(50)-F(5A)   | 107.6(5) | F(5A)-C(50)-C(47)   | 111.7(4) |
| F(6A)-C(50)-C(47)   | 111.9(3) | F(6A)-C(50)-F(4A)   | 108.1(5) |
| F(6A)-C(50)-F(5A)   | 104.5(5) | F(4B)-C(50)-C(47)   | 114.7(6) |
| F(5B)-C(50)-C(47)   | 115.6(6) | F(5B)-C(50)-F(4B)   | 103.3(8) |
| F(5B)-C(50)-F(6B)   | 105.5(8) | F(6B)-C(50)-C(47)   | 115.0(6) |
| F(6B)-C(50)-F(4B)   | 101.1(8) | F(4C)-C(50)-C(47)   | 111.9(6) |
| F(4C)-C(50)-F(5C)   | 104.7(8) | F(4C)-C(50)-F(6C)   | 108.8(8) |
| F(5C)-C(50)-C(47)   | 111.5(7) | F(5C)-C(50)-F(6C)   | 107.0(8) |
| F(6C)-C(50)-C(47)   | 112.5(6) | C(52)-C(51)-B(1)    | 123.0(2) |
| C(56)-C(51)-C(52)   | 115.4(2) | C(56)-C(51)-B(1)    | 121.6(2) |
| C(51)-C(52)-H(52)   | 118.8    | C(53)-C(52)-C(51)   | 122.3(2) |
| C(53)-C(52)-H(52)   | 118.8    | C(52)-C(53)-C(58)   | 119.5(2) |
| C(54)-C(53)-C(52)   | 120.7(3) | C(54)-C(53)-C(58)   | 119.6(2) |
| C(53)-C(54)-H(54)   | 121.0    | C(53)-C(54)-C(55)   | 118.0(2) |
| C(55)-C(54)-H(54)   | 121.0    | C(54)-C(55)-C(56)   | 121.3(2) |
| C(54)-C(55)-C(57)   | 119.5(3) | C(56)-C(55)-C(57)   | 119.1(3) |
| C(51)-C(56)-H(56)   | 118.9    | C(55)-C(56)-C(51)   | 122.2(2) |
| C(55)-C(56)-H(56)   | 118.9    | F(7A)-C(57)-C(55)   | 114.8(3) |
| F(7A)-C(57)-F(8A)   | 116.3(4) | F(7A)-C(57)-F(9A)   | 102.5(3) |
| F(8A)-C(57)-C(55)   | 111.9(3) | F(8A)-C(57)-F(9A)   | 101.1(3) |
| F(9A)-C(57)-C(55)   | 108.5(3) | F(7B)-C(57)-C(55)   | 108.1(5) |
| F(8B)-C(57)-C(55)   | 123.2(7) | F(8B)-C(57)-F(7B)   | 91.5(7)  |
| F(9B)-C(57)-C(55)   | 122.7(6) | F(9B)-C(57)-F(7B)   | 93.2(7)  |
| F(9B)-C(57)-F(8B)   | 108.1(8) | F(10A)-C(58)-C(53)  | 116.5(3) |
| F(10A)-C(58)-F(11A) | 102.4(4) | F(11A)-C(58)-C(53)  | 111.0(3) |
| F(12A)-C(58)-C(53)  | 115.6(3) | F(12A)-C(58)-F(10A) | 106.6(4) |
| F(12A)-C(58)-F(11A) | 103.1(4) | F(10B)-C(58)-C(53)  | 113.0(4) |

|                     |            |                      |            |
|---------------------|------------|----------------------|------------|
| F(10B)-C(58)-F(11B) | 96.7(6)    | F(10B)-C(58)-F(12B)  | 118.5(7)   |
| F(11B)-C(58)-C(53)  | 108.8(4)   | F(12B)-C(58)-C(53)   | 113.0(7)   |
| F(12B)-C(58)-F(11B) | 104.6(7)   | F(10C)-C(58)-C(53)   | 103.6(4)   |
| F(11C)-C(58)-C(53)  | 111.9(5)   | F(11C)-C(58)-F(10C)  | 100.5(6)   |
| F(11C)-C(58)-F(12C) | 119.9(7)   | F(12C)-C(58)-C(53)   | 115.1(6)   |
| F(12C)-C(58)-F(10C) | 102.6(6)   | C(43)#2-B(1)-C(43)   | 111.9(3)   |
| C(51)#2-B(1)-C(43)  | 111.27(12) | C(51)#2-B(1)-C(43)#2 | 105.96(12) |
| C(51)-B(1)-C(43)#2  | 111.27(12) | C(51)-B(1)-C(43)     | 105.96(12) |
| C(51)-B(1)-C(51)#2  | 110.6(3)   | F(1A)-C(49A)-C(45)   | 115.1(6)   |
| F(1A)-C(49A)-F(3A)  | 105.5(7)   | F(2A)-C(49A)-C(45)   | 110.6(5)   |
| F(2A)-C(49A)-F(1A)  | 102.2(7)   | F(2A)-C(49A)-F(3A)   | 112.3(7)   |
| F(3A)-C(49A)-C(45)  | 110.9(6)   | F(1B)-C(49B)-C(45)   | 123.4(11)  |
| F(1B)-C(49B)-F(2B)  | 107.3(12)  | F(1B)-C(49B)-F(3B)   | 104.5(12)  |
| F(2B)-C(49B)-C(45)  | 110.9(11)  | F(2B)-C(49B)-F(3B)   | 95.1(9)    |
| F(3B)-C(49B)-C(45)  | 111.8(11)  |                      |            |

---

Symmetry transformations used to generate equivalent atoms:

#1  $-x+3/2, -y+1/2, -z+1$  #2  $-x+1, y, -z+3/2$

## 10. References

- (1) Kuziola, J.; Magre, M.; Nöthling, N.; Cornella, J., *Organometallics* 2022, **41**, 1754.
- (2) Yakubenko, A. A.; Puzyk, A. M.; Korostelev, V. O.; Mulloyarova, V. V.; Tupikina, E. Yu.; Tolstoy, P. M.; Antonov, A. S., *Phys. Chem. Chem. Phys.* 2022, **24**, 7882.
- (3) Wenger, J. S.; Getahun, A.; Johnstone, T. C., *Polyhedron* 2024, **247**, 116730.
- (4) Kuziola, J. Dissertation: Synthesis and Characterization of Mono-and Bimetallic Organobismuth(V) Compounds, Ruhr-Universität Bochum, Max-Planck Institut für Kohlenforschung, 2024.
- (5) Martin, G. J.; Martin, M. L.; Gouesnard, J.-P.; Diehl, P.; Fluck, E.; Kosfeld, R.; Series Eds.; Springer Berlin Heidelberg: Berlin, Heidelberg, 1981, **18**. (Please see page 129)
- (6) Wagner, J. P.; Schreiner, P. R., *Angew. Chem. Int. Ed.* 2015, **54**, 12274.
- (7) Rösel, S.; Becker, J.; Allen, W. D.; Schreiner, P. R. *J. Am. Chem. Soc.* 2018, **140**, 14421–14432.
- (8) Grimme, S.; Schreiner, P. R., *Angew. Chem. Int. Ed.* 2011, **50**, 12639–12642.
- (9) Kratzert, D.; Holstein, J. J.; Krossing, I., *J. Appl. Crystallogr.* 2015, **48**, 933.
- (10) Kratzert, D.; Krossing, I., *J. Appl. Crystallogr.* 2018, **51**, 928.

## 11. NMR Data

$^1\text{H}$  NMR (300 MHz,  $\text{CDCl}_3$ )

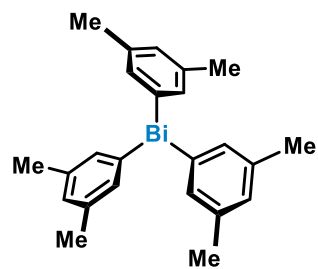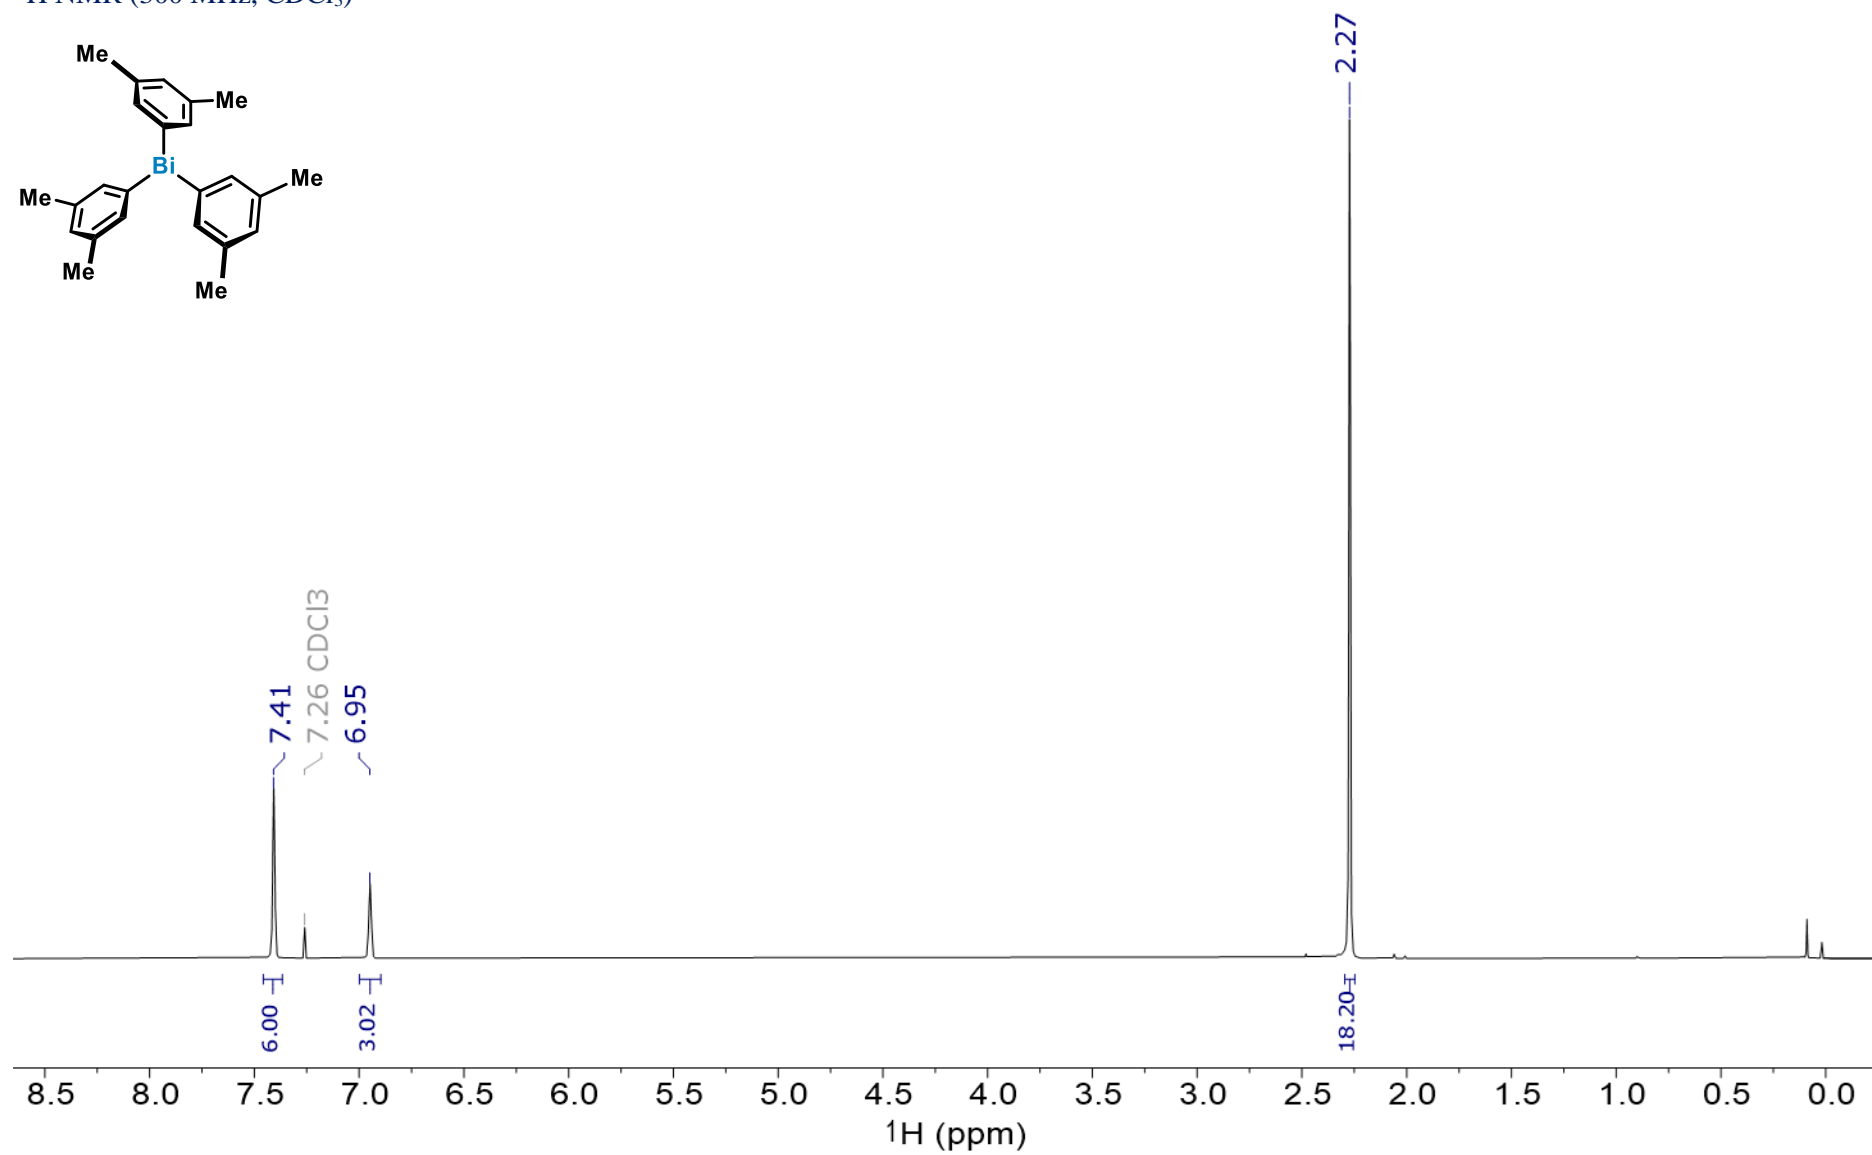

$^{13}\text{C}$  NMR (75 MHz,  $\text{CDCl}_3$ )  $\delta$

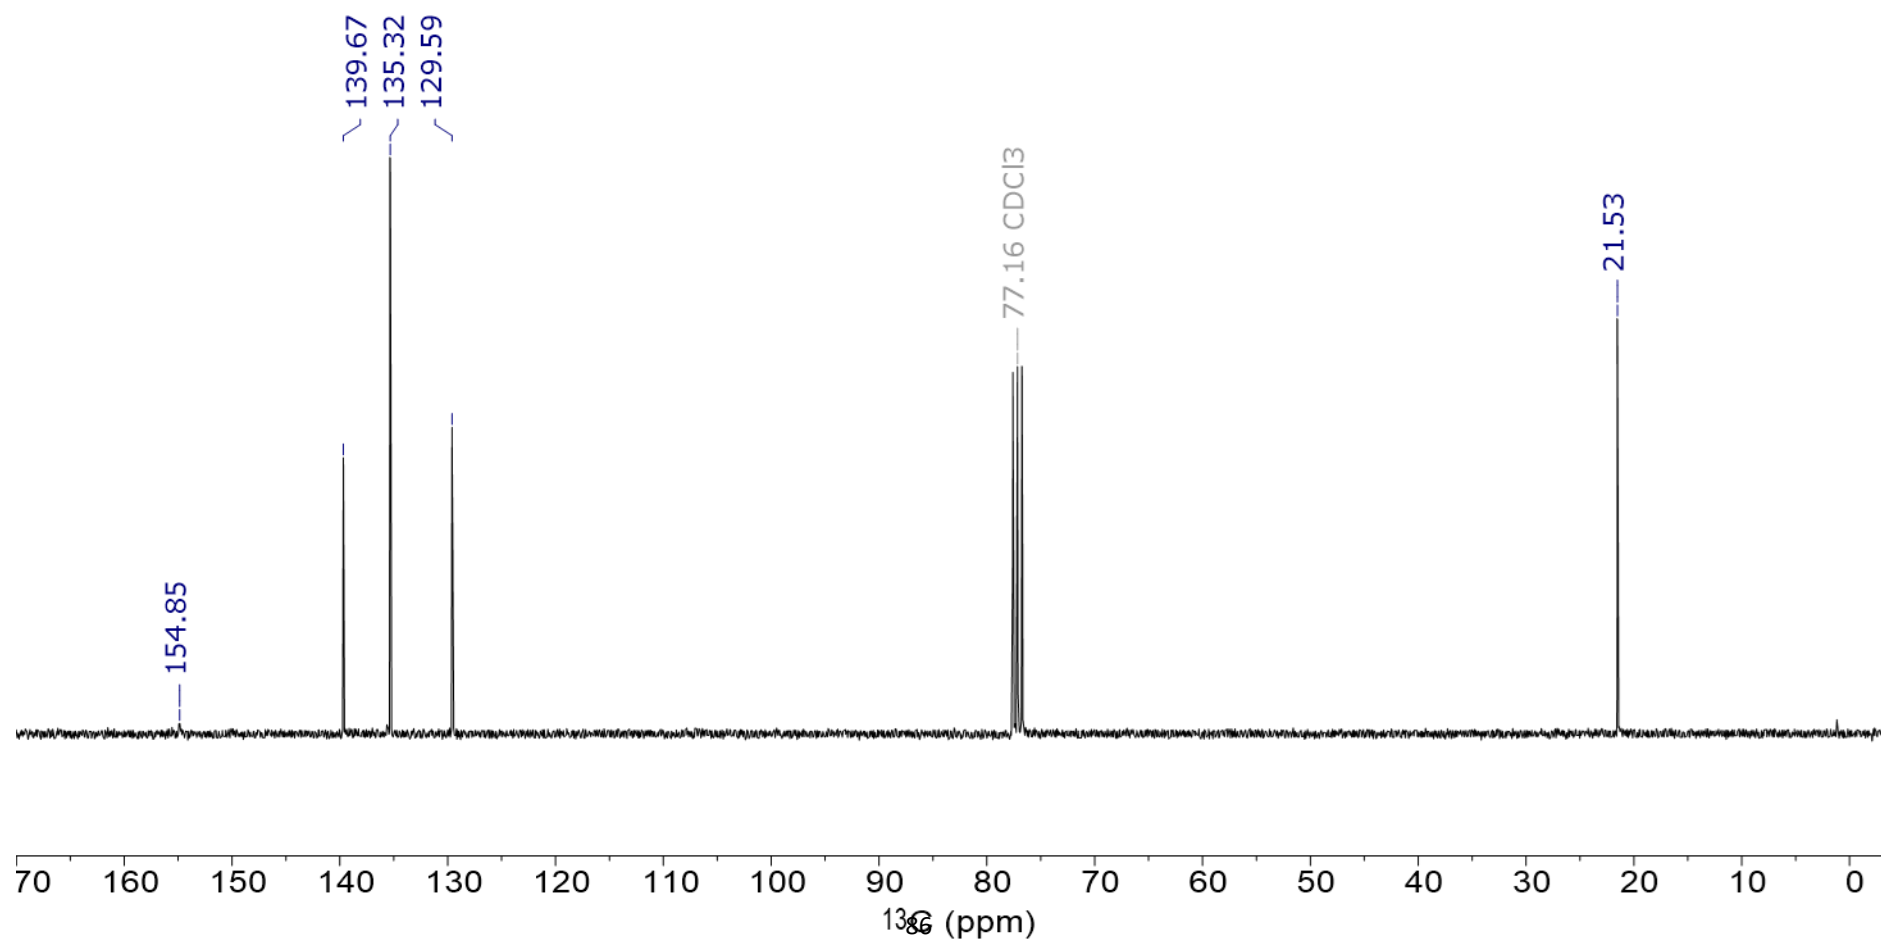

$^1\text{H}$  NMR (300 MHz,  $\text{CDCl}_3$ )

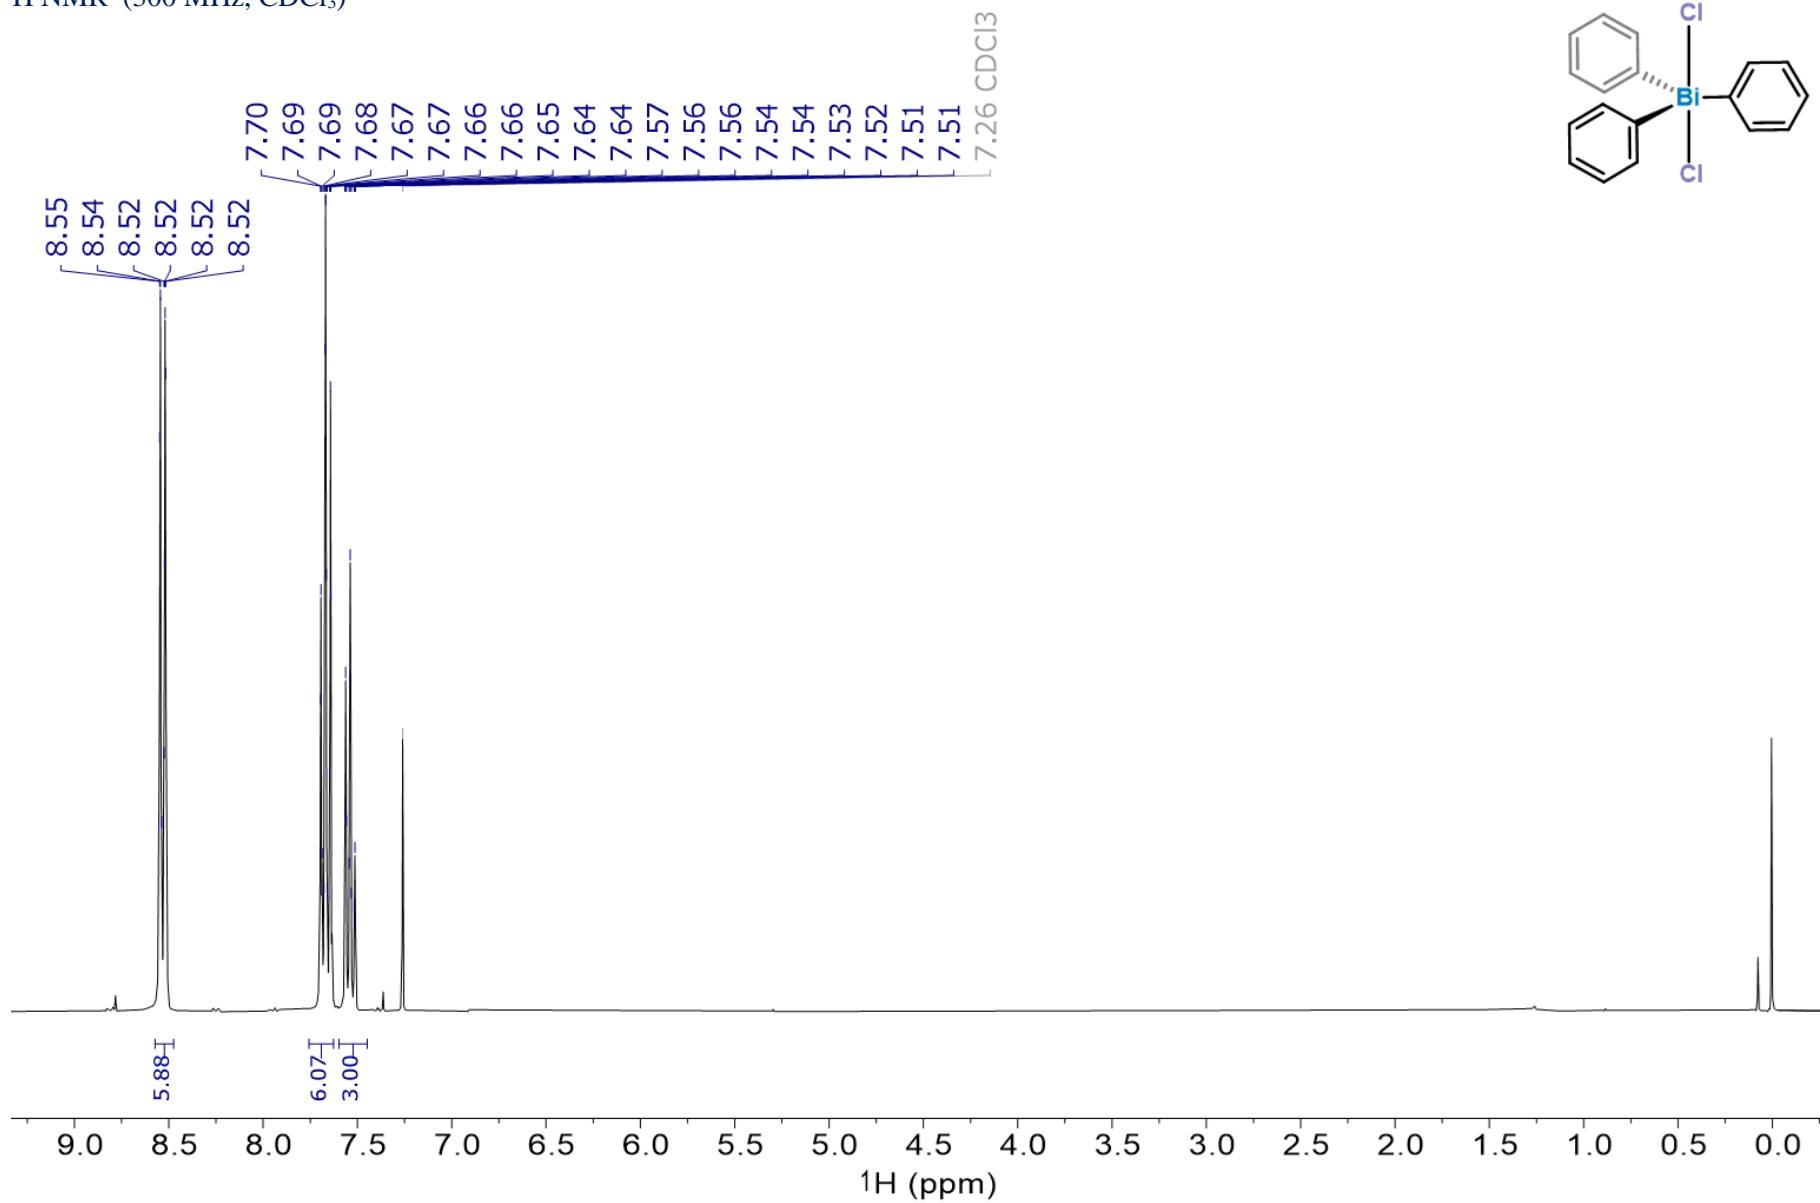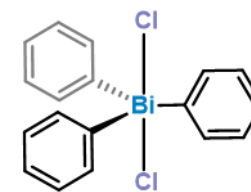

$^{13}\text{C}$  NMR (75 MHz,  $\text{CDCl}_3$ )

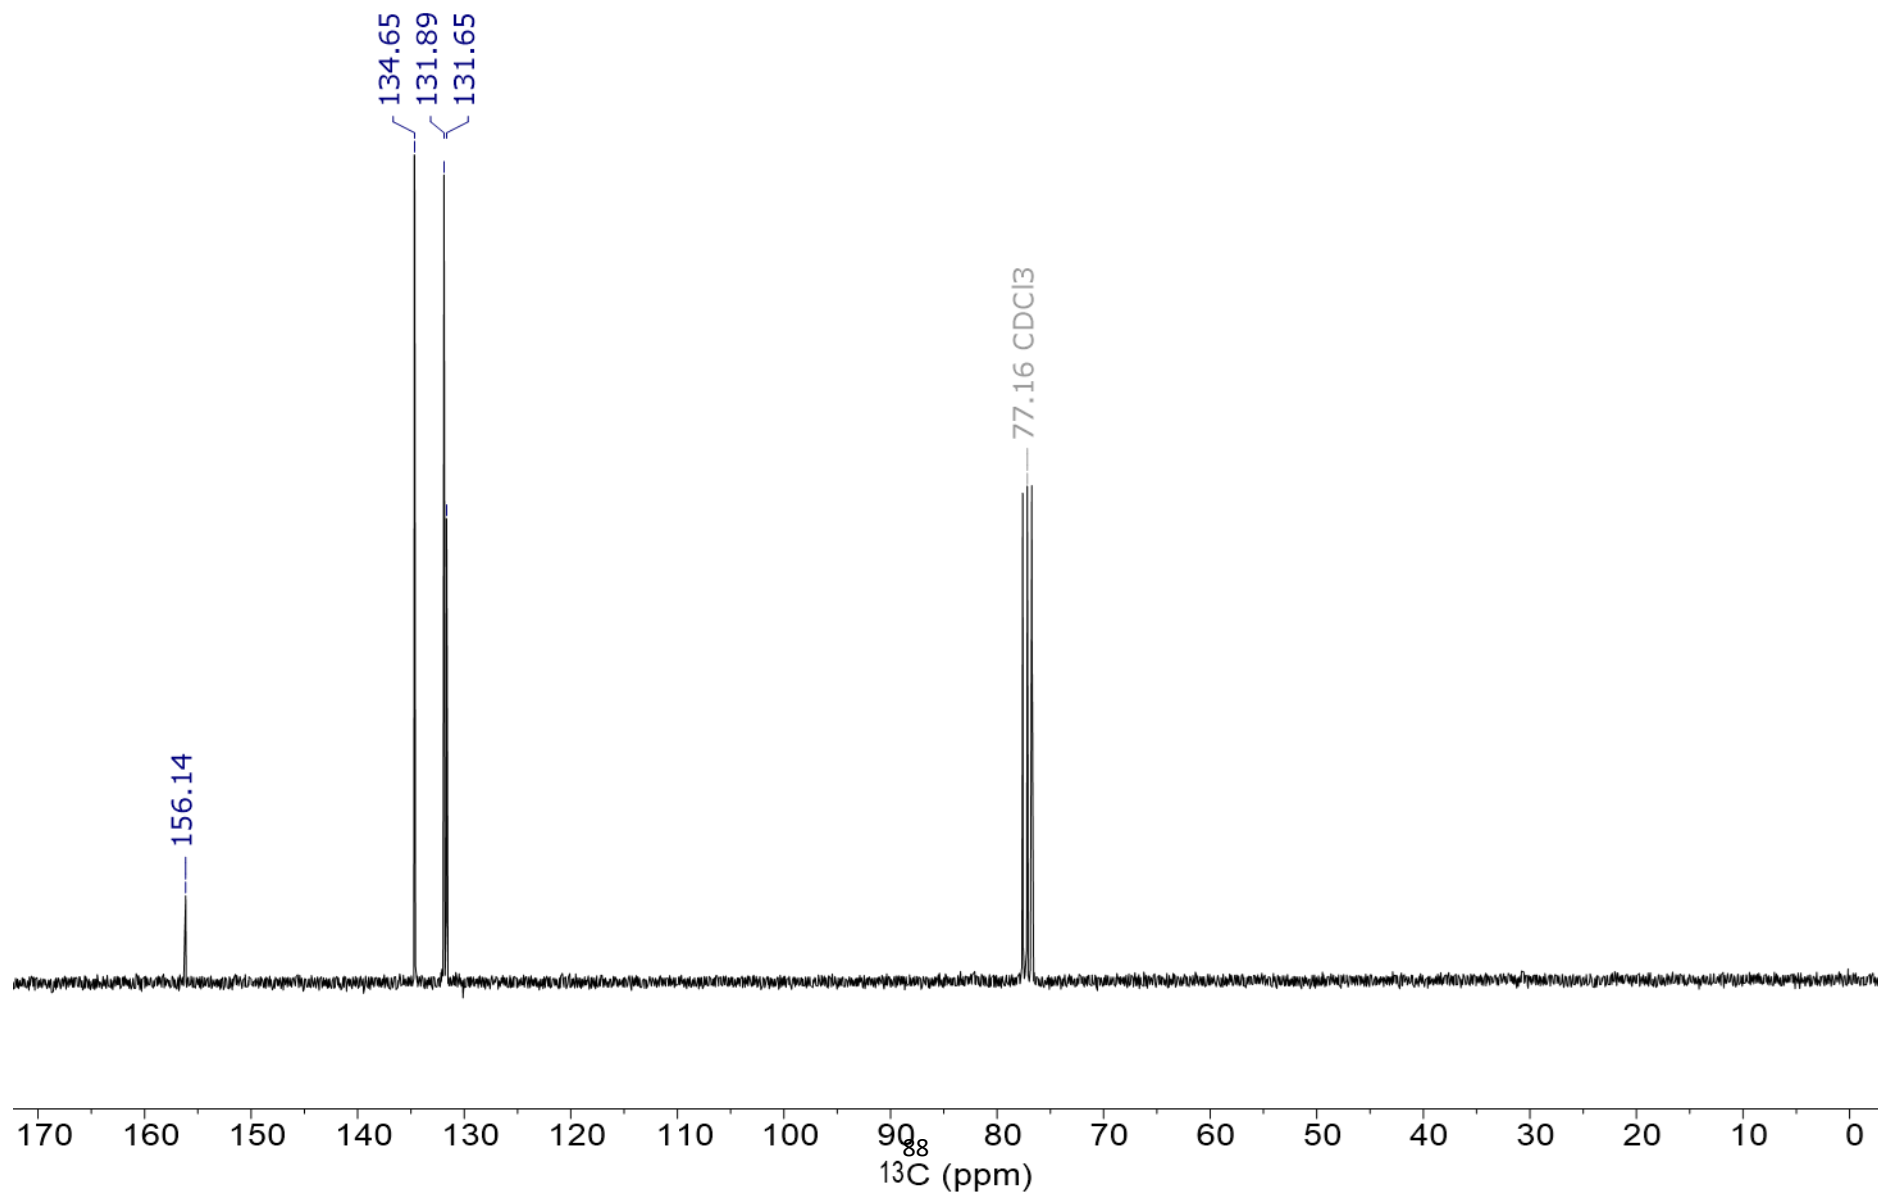



$^1\text{H}$  NMR (500 MHz,  $\text{CDCl}_3$ )

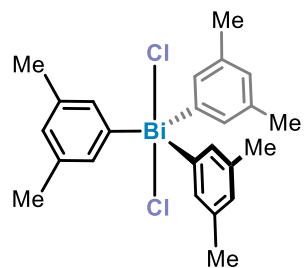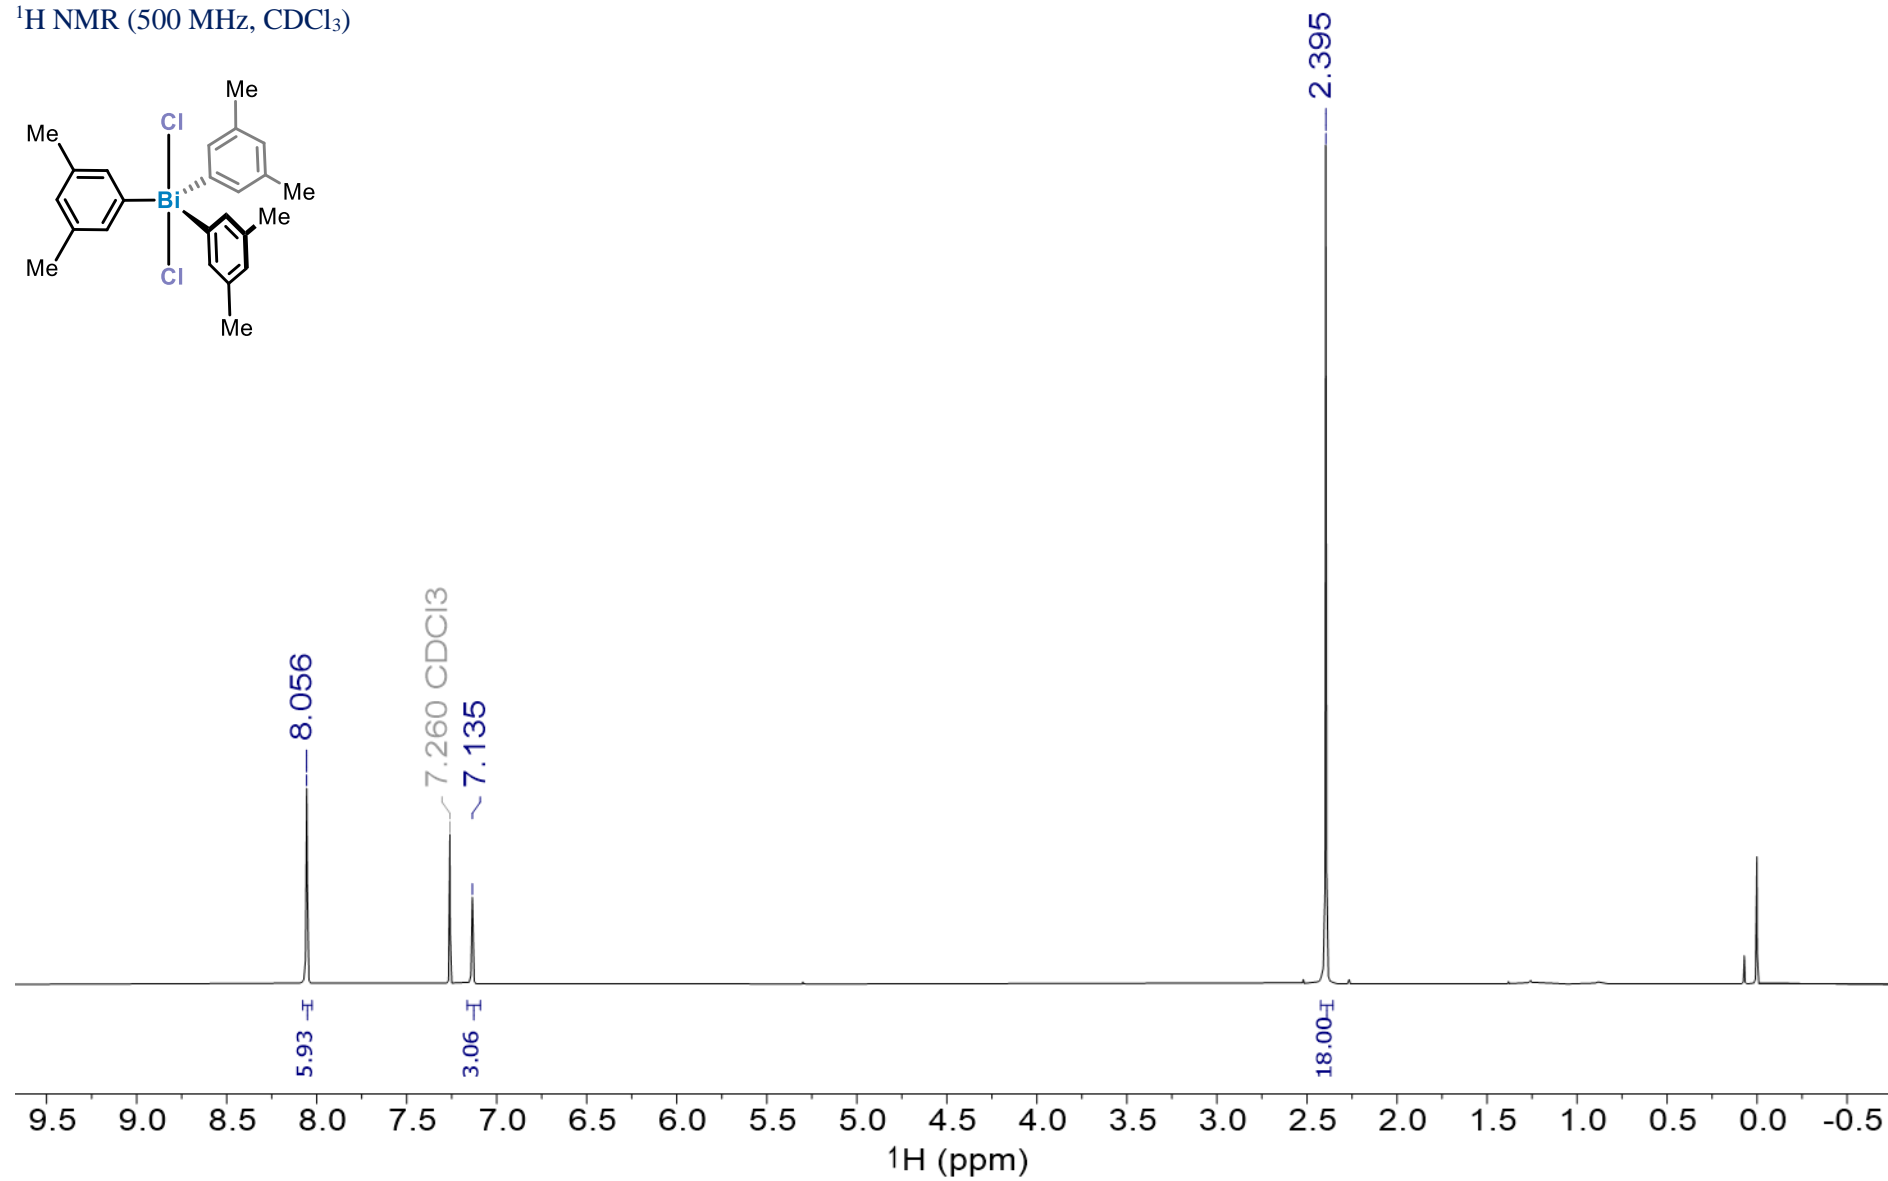

$^{13}\text{C}$  NMR (101 MHz,  $\text{CDCl}_3$ )

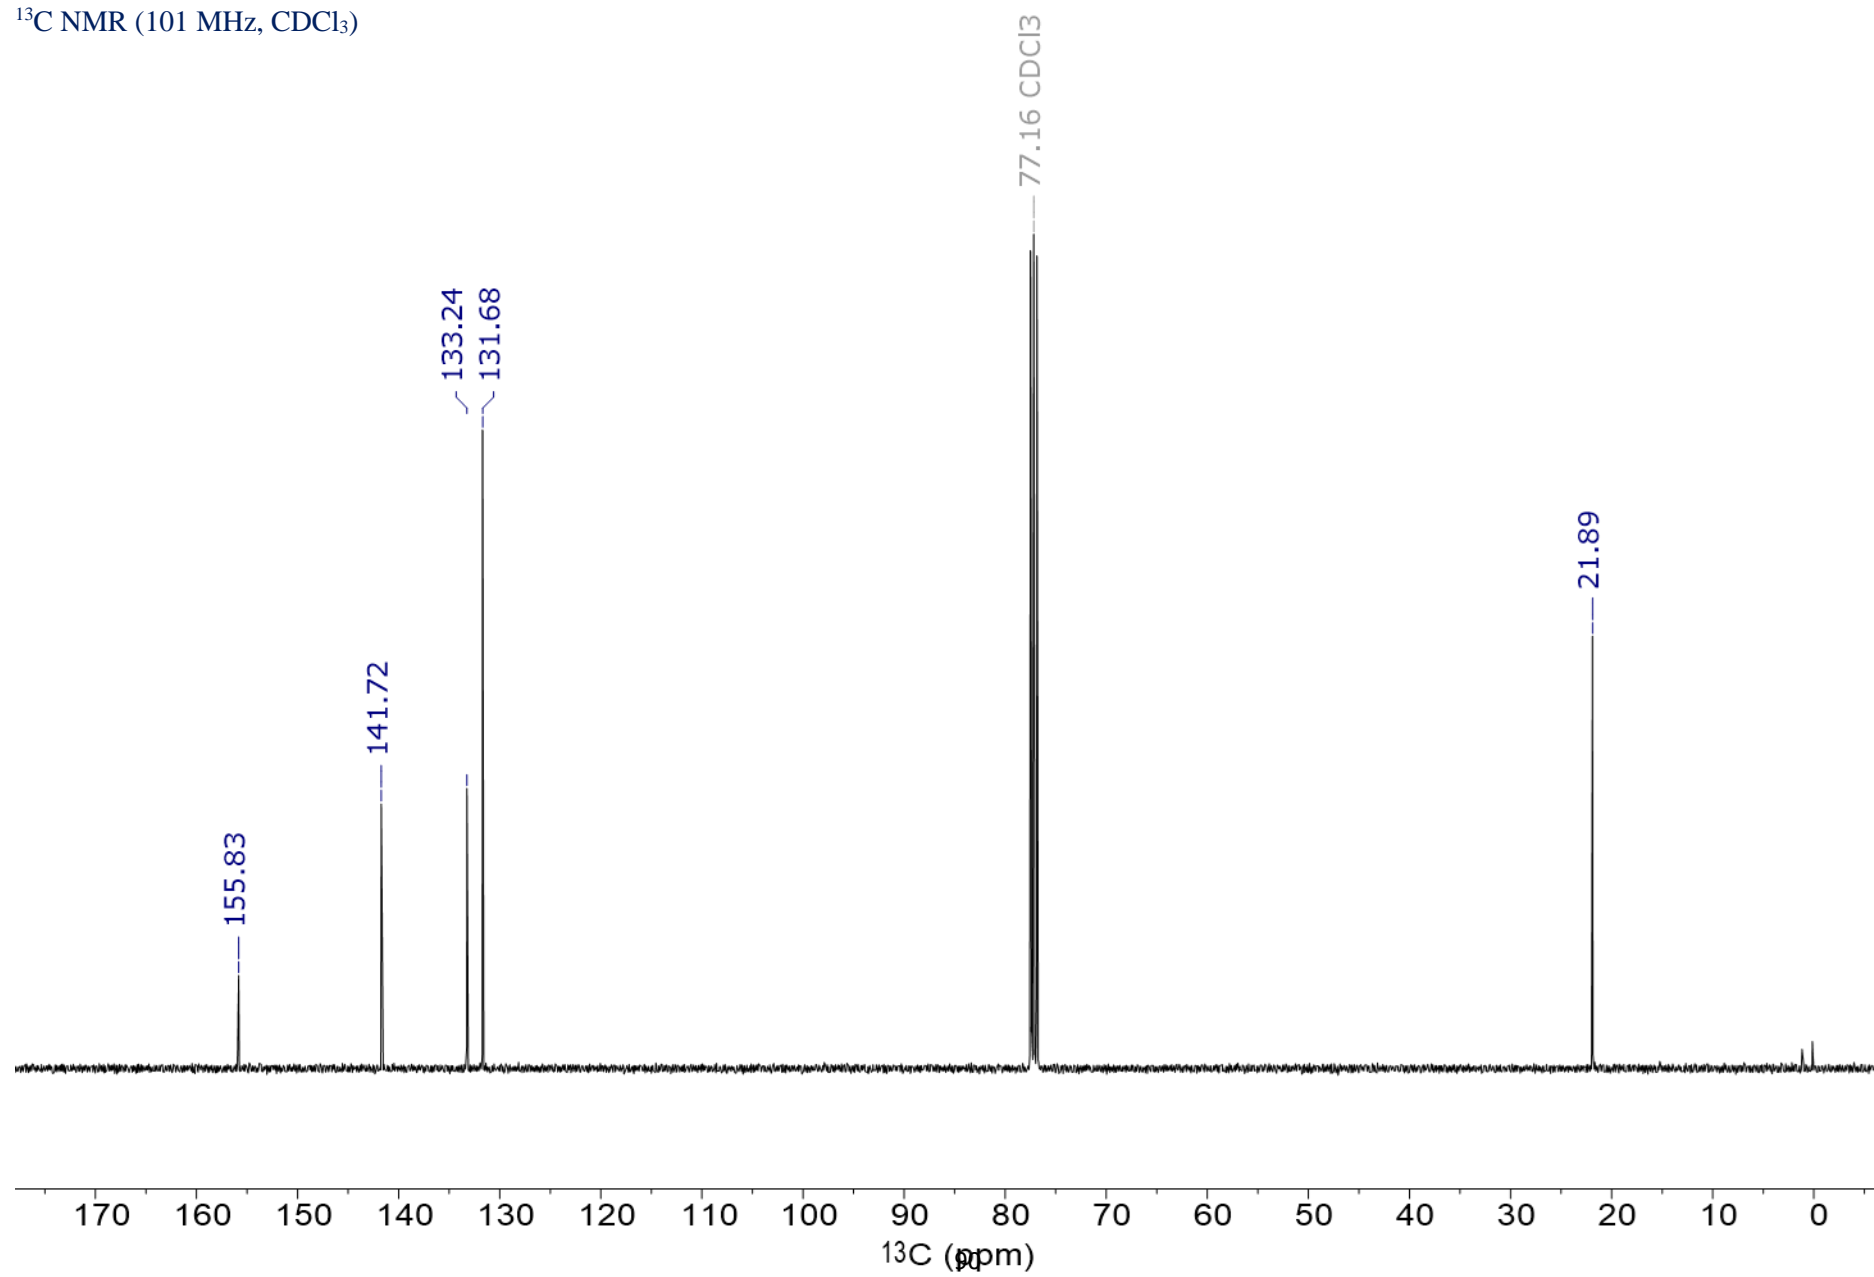

$^1\text{H}$  NMR (300 MHz,  $\text{CDCl}_3$ )

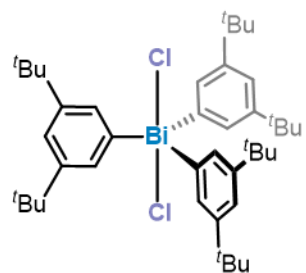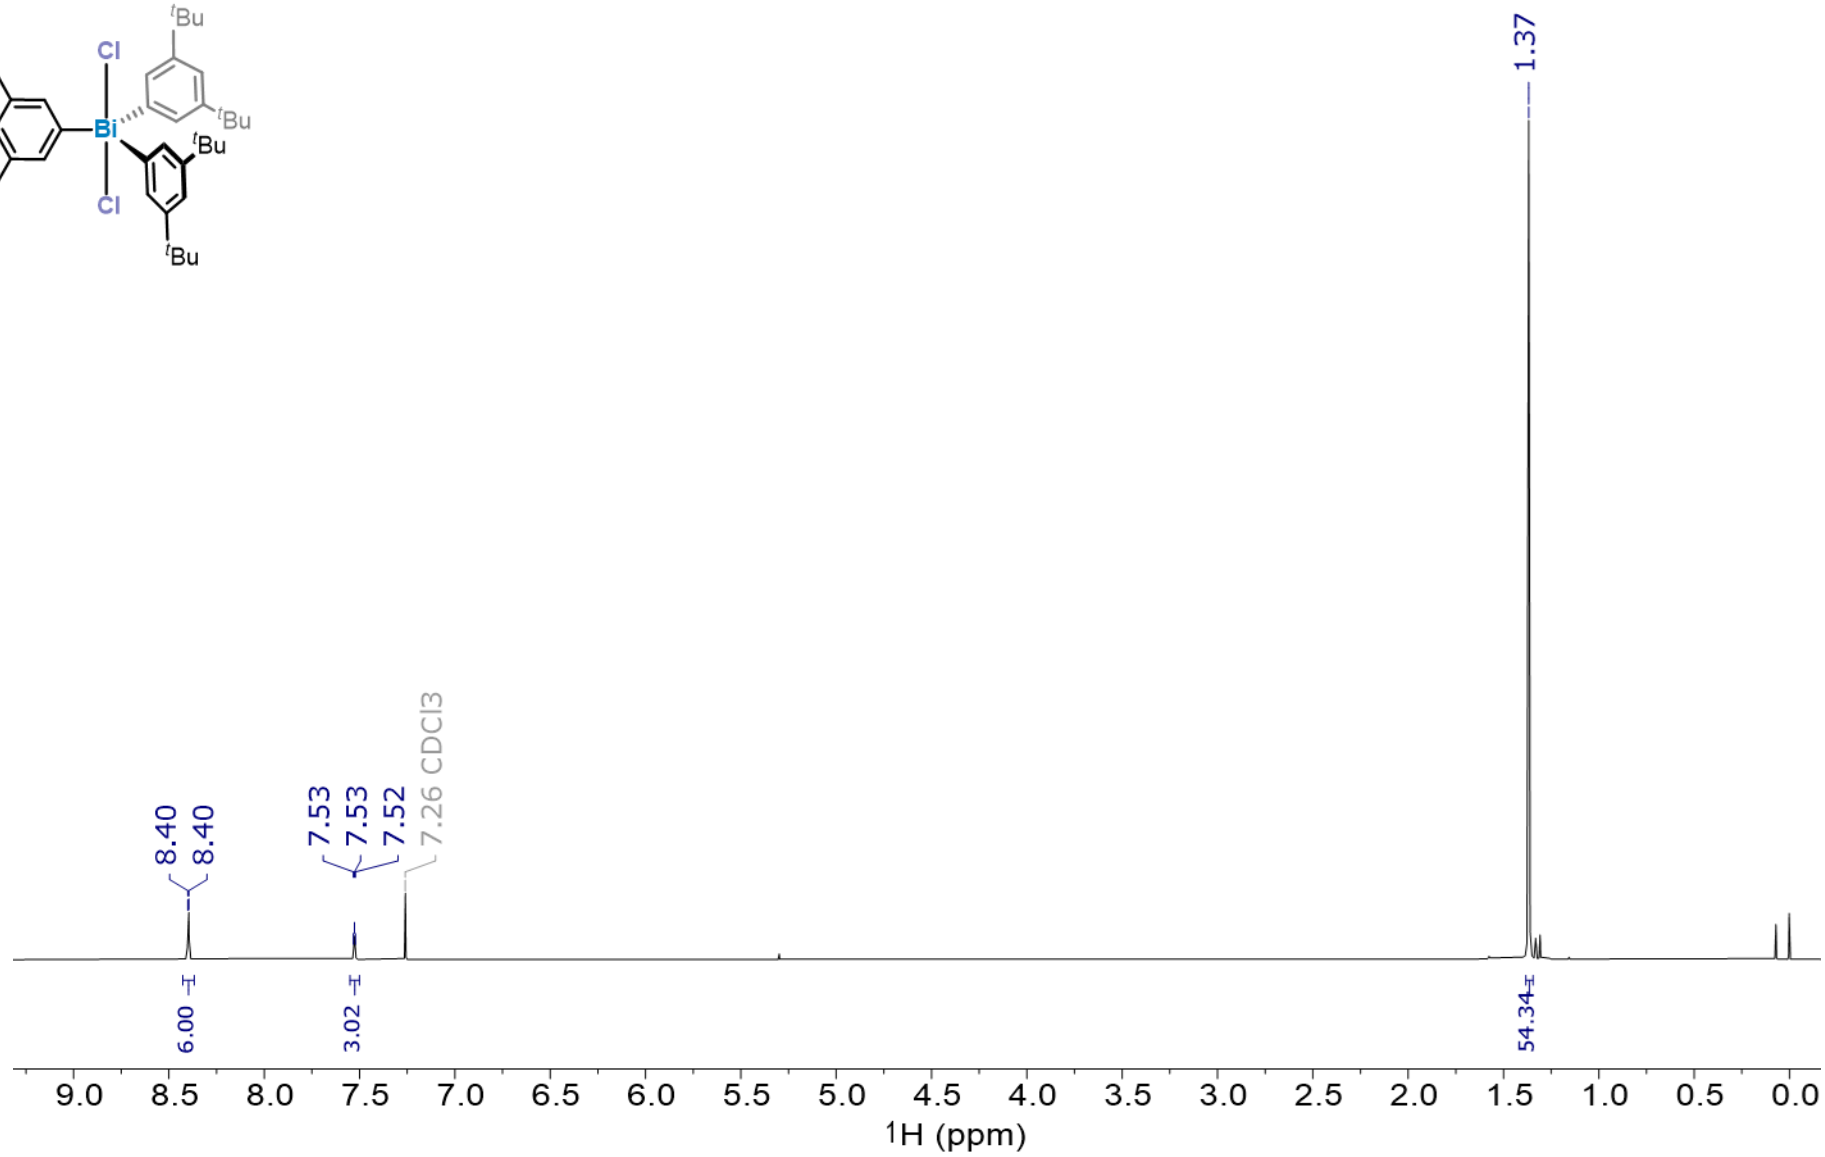

$^{13}\text{C}$  NMR (75 MHz,  $\text{CDCl}_3$ )

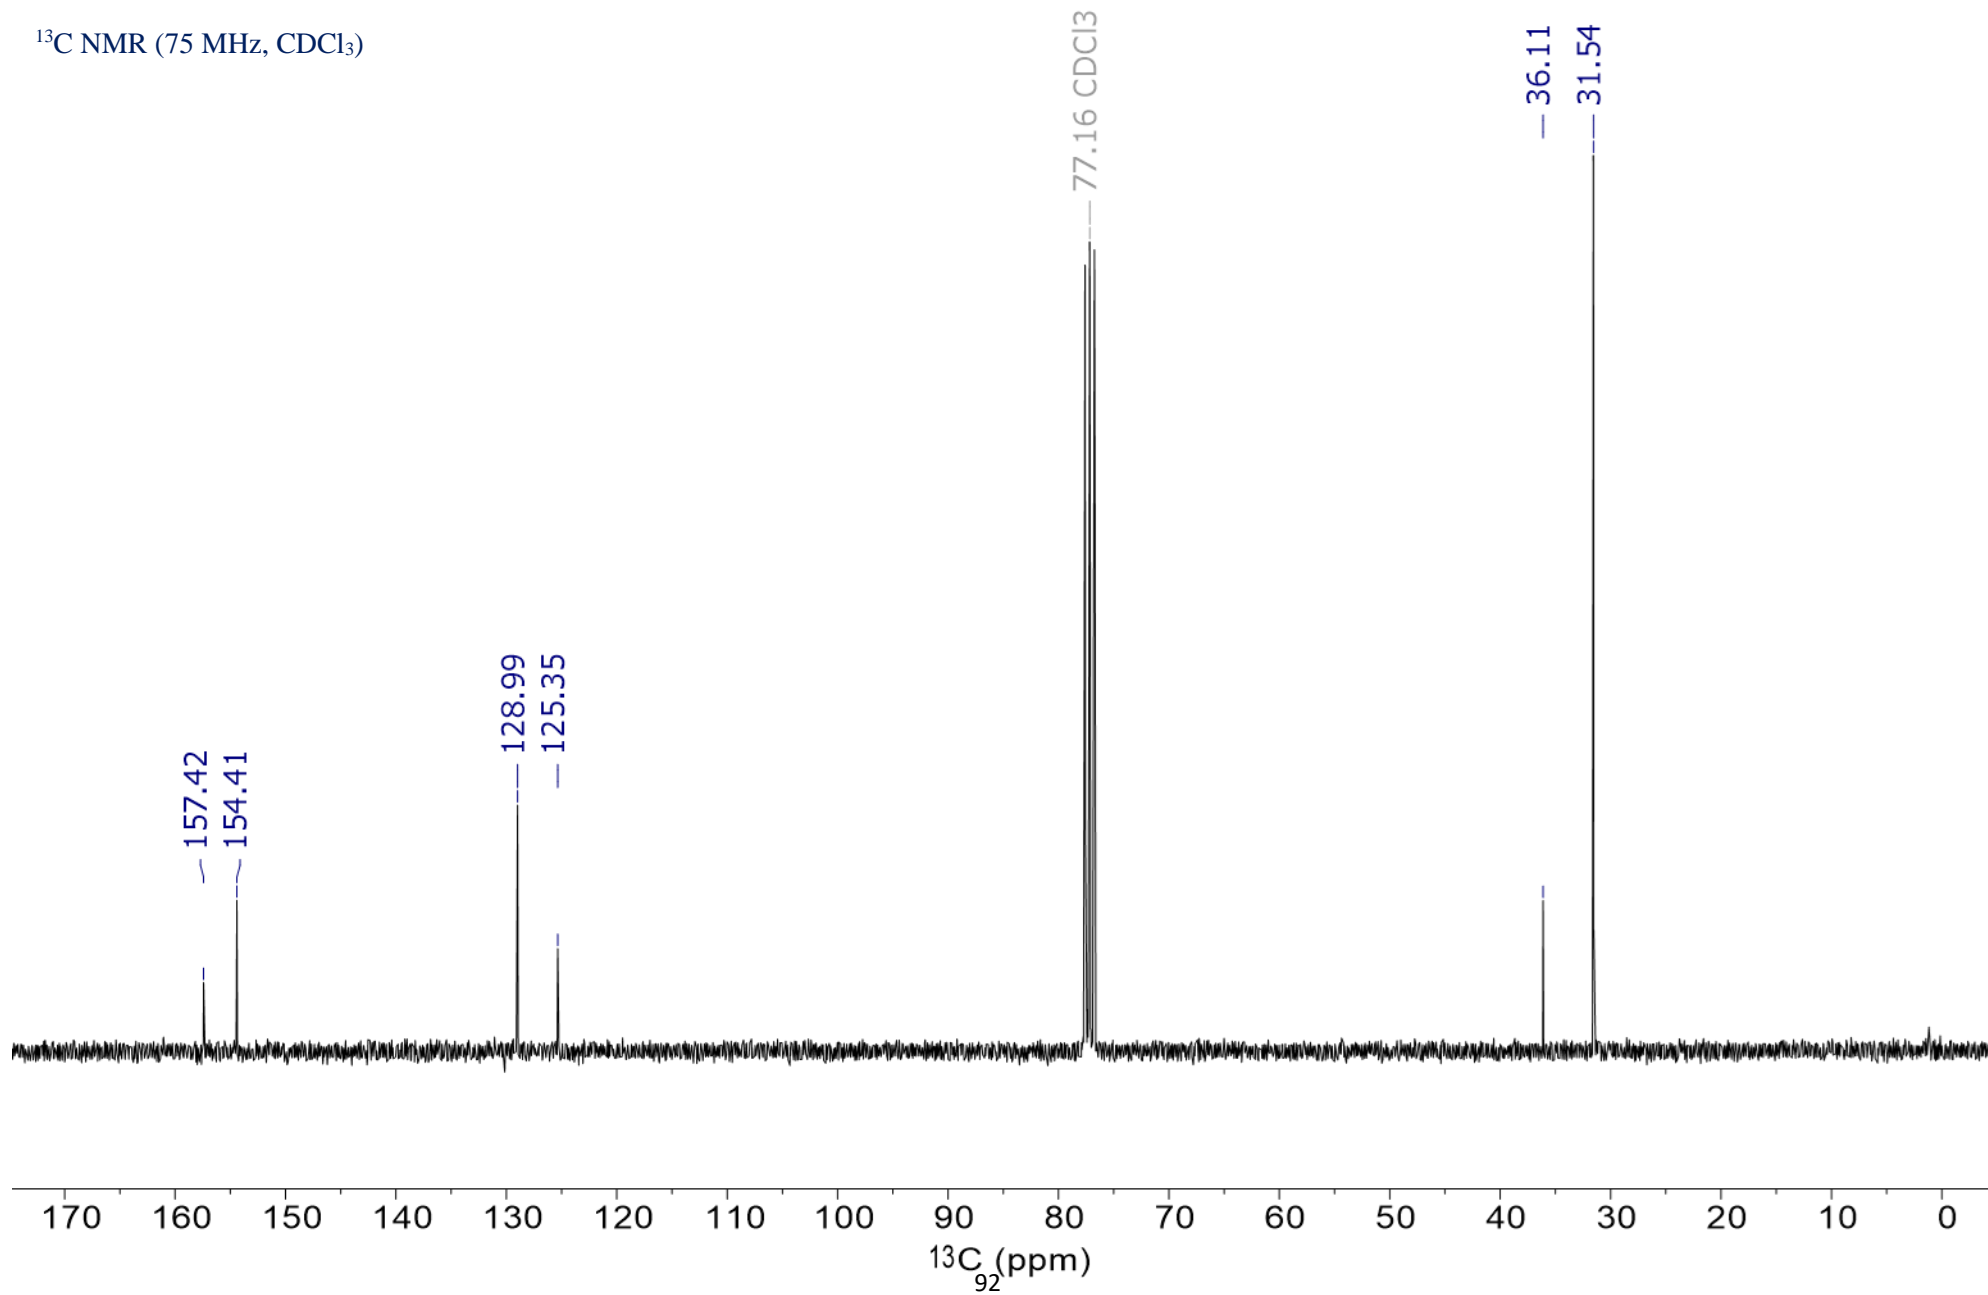

$^1\text{H}$  NMR (400 MHz,  $\text{CDCl}_3$ )

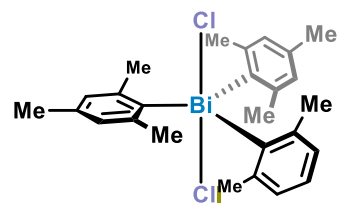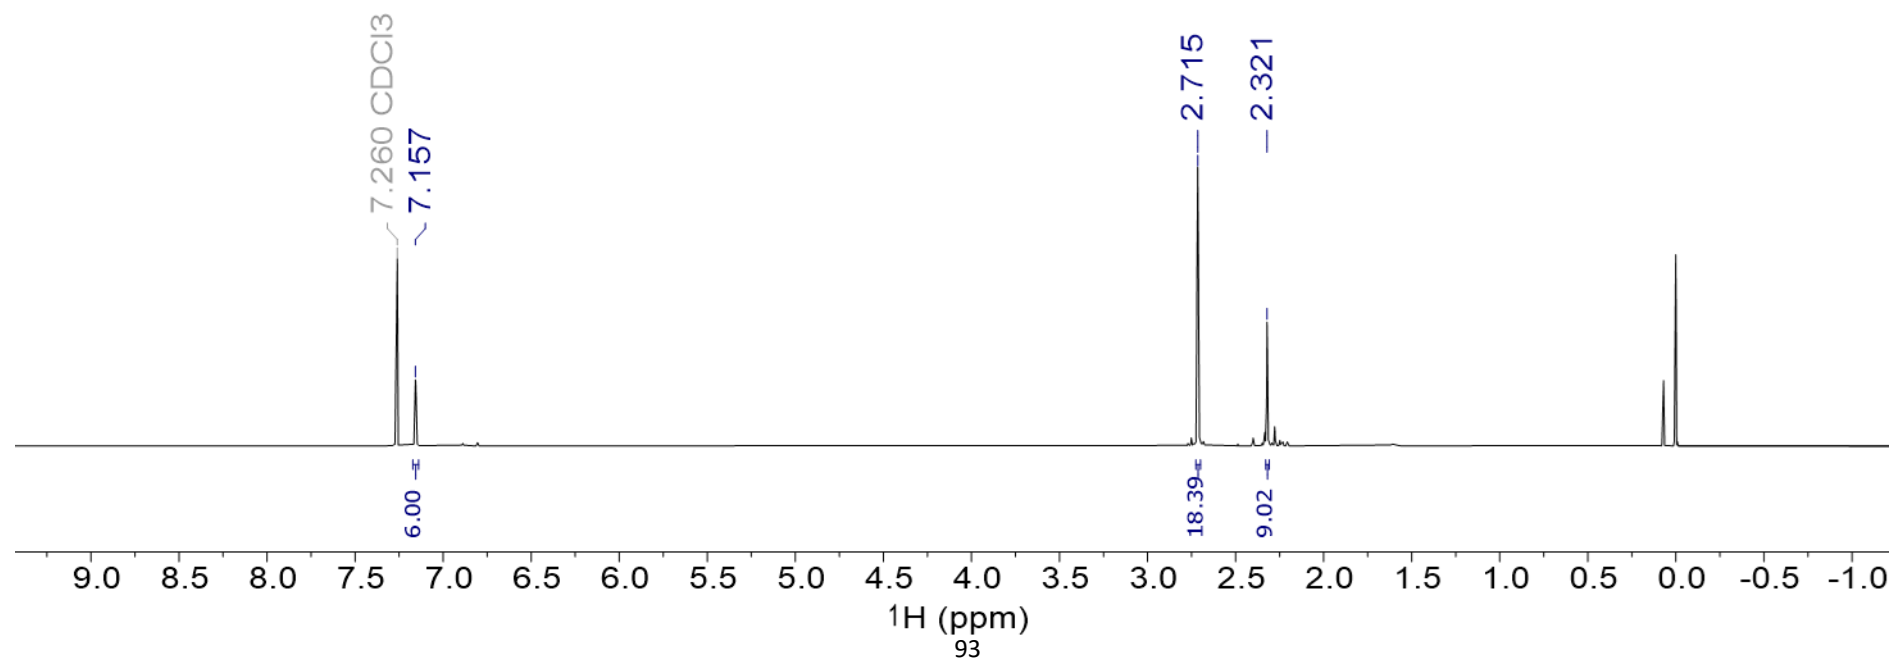

$^{13}\text{C}$  NMR (75 MHz,  $\text{CDCl}_3$ )

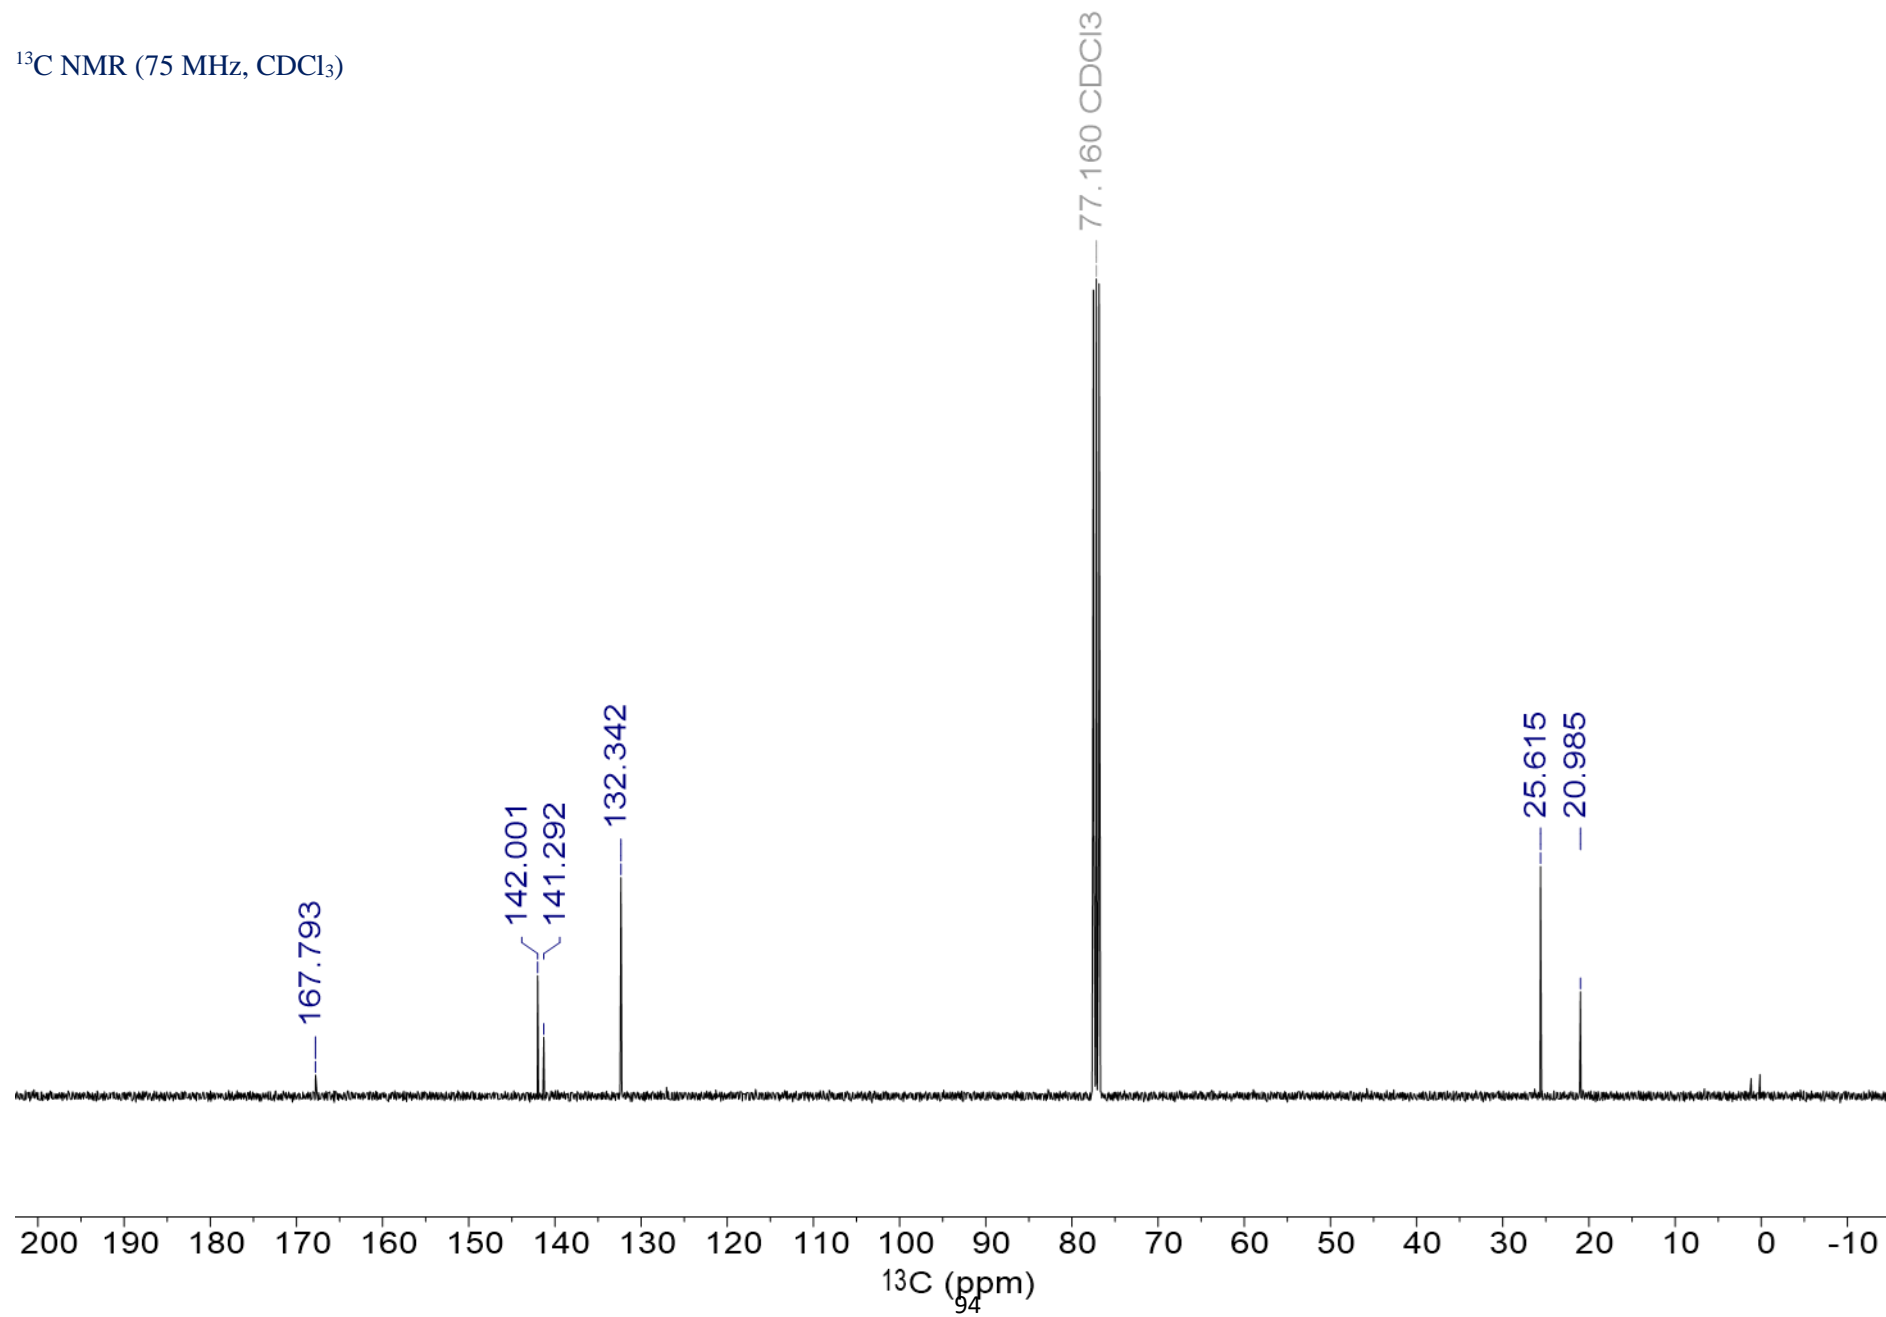

$^1\text{H}$  NMR (300 MHz,  $\text{CDCl}_3$ )

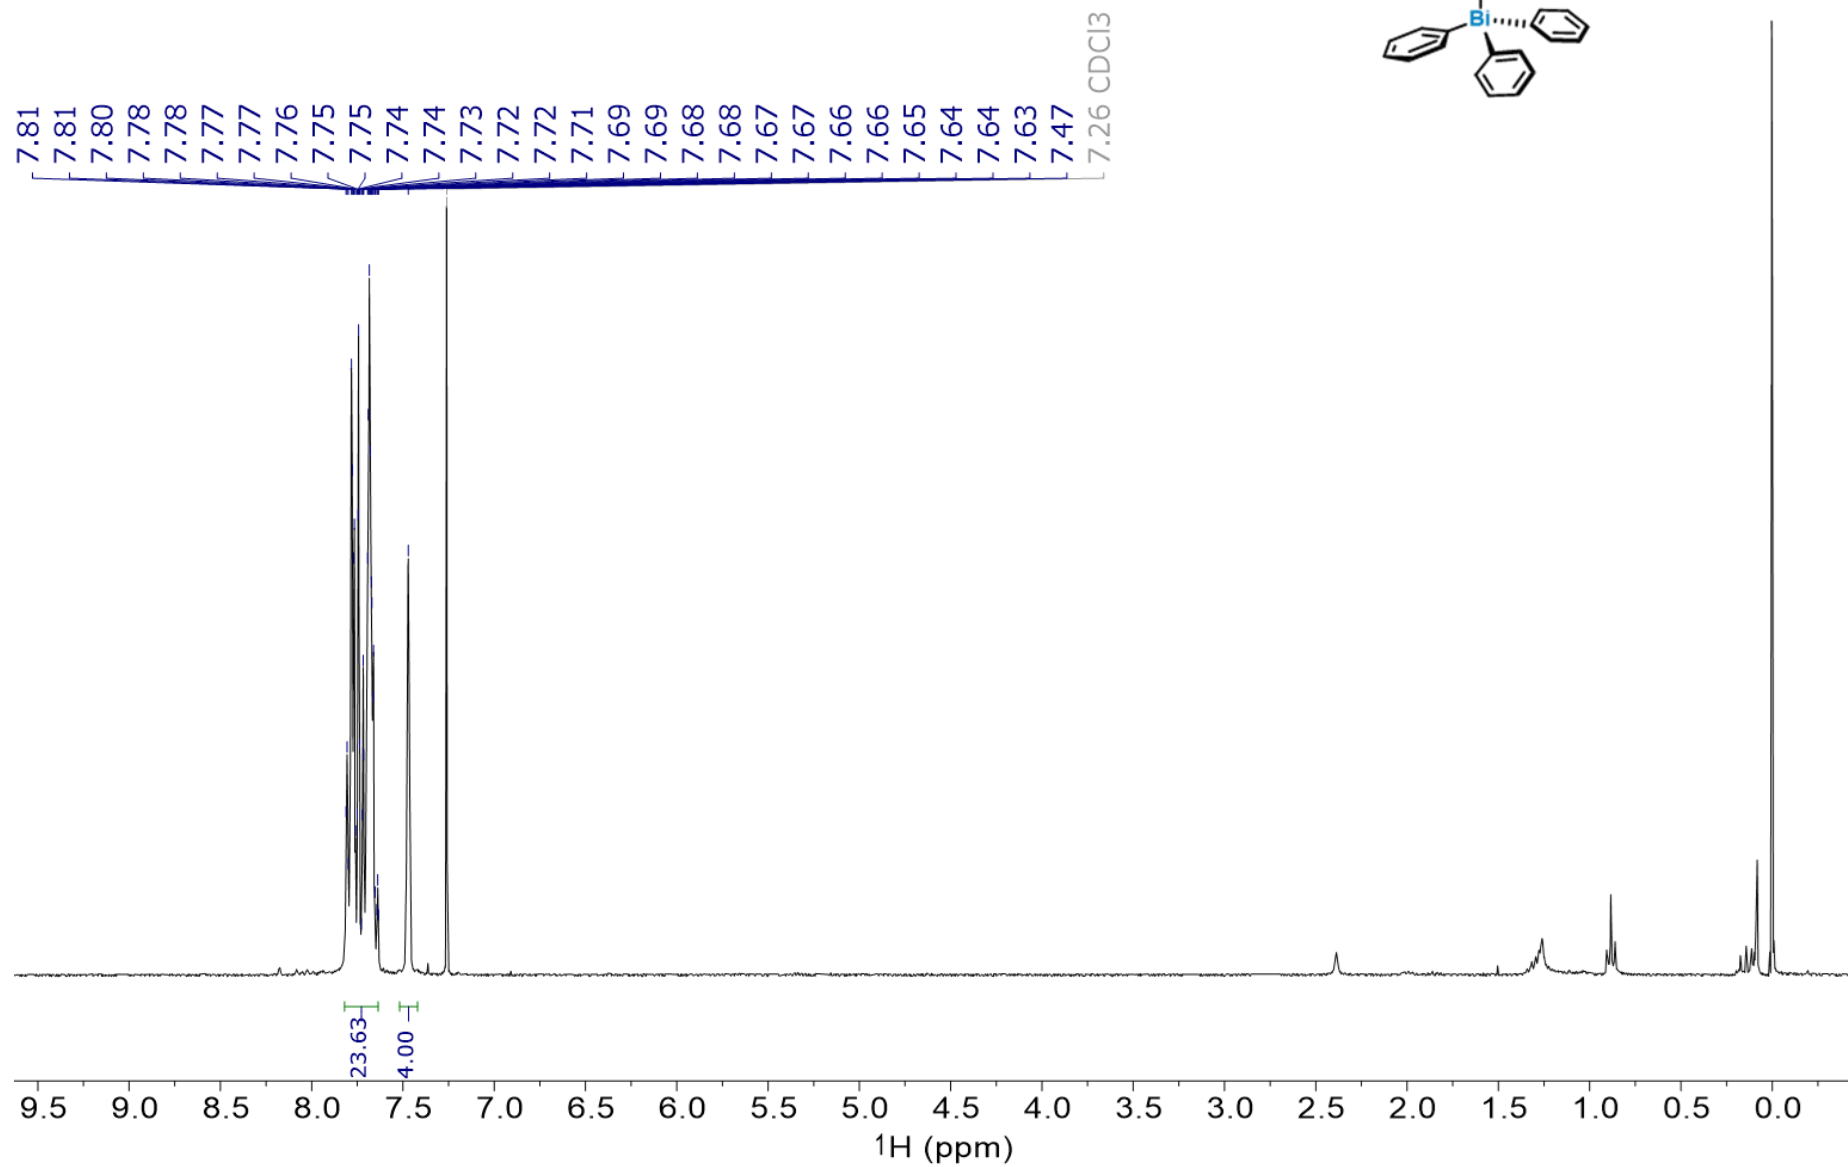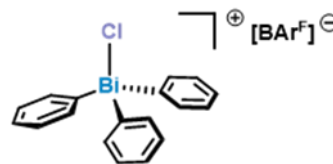

$^{13}\text{C}$  NMR (101 MHz,  $\text{CDCl}_3$ )

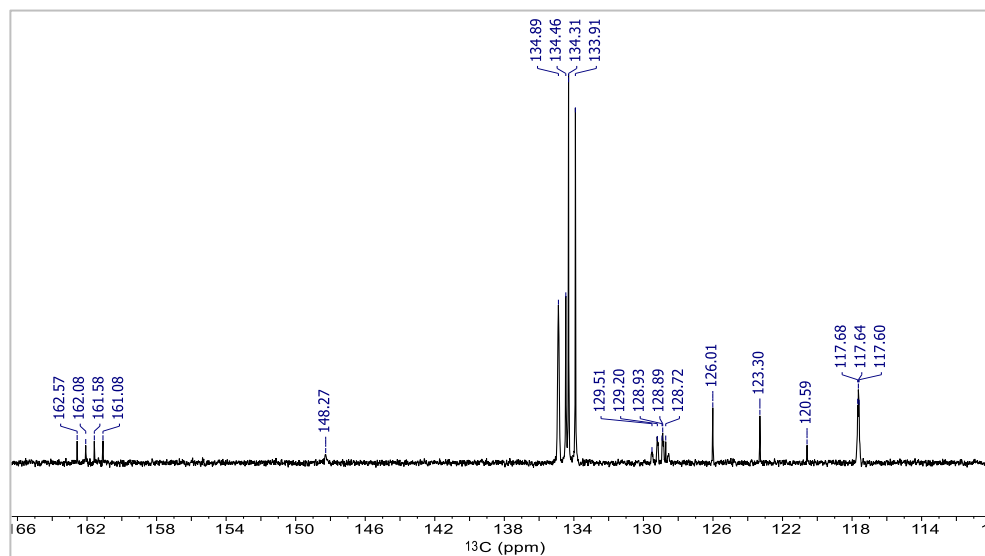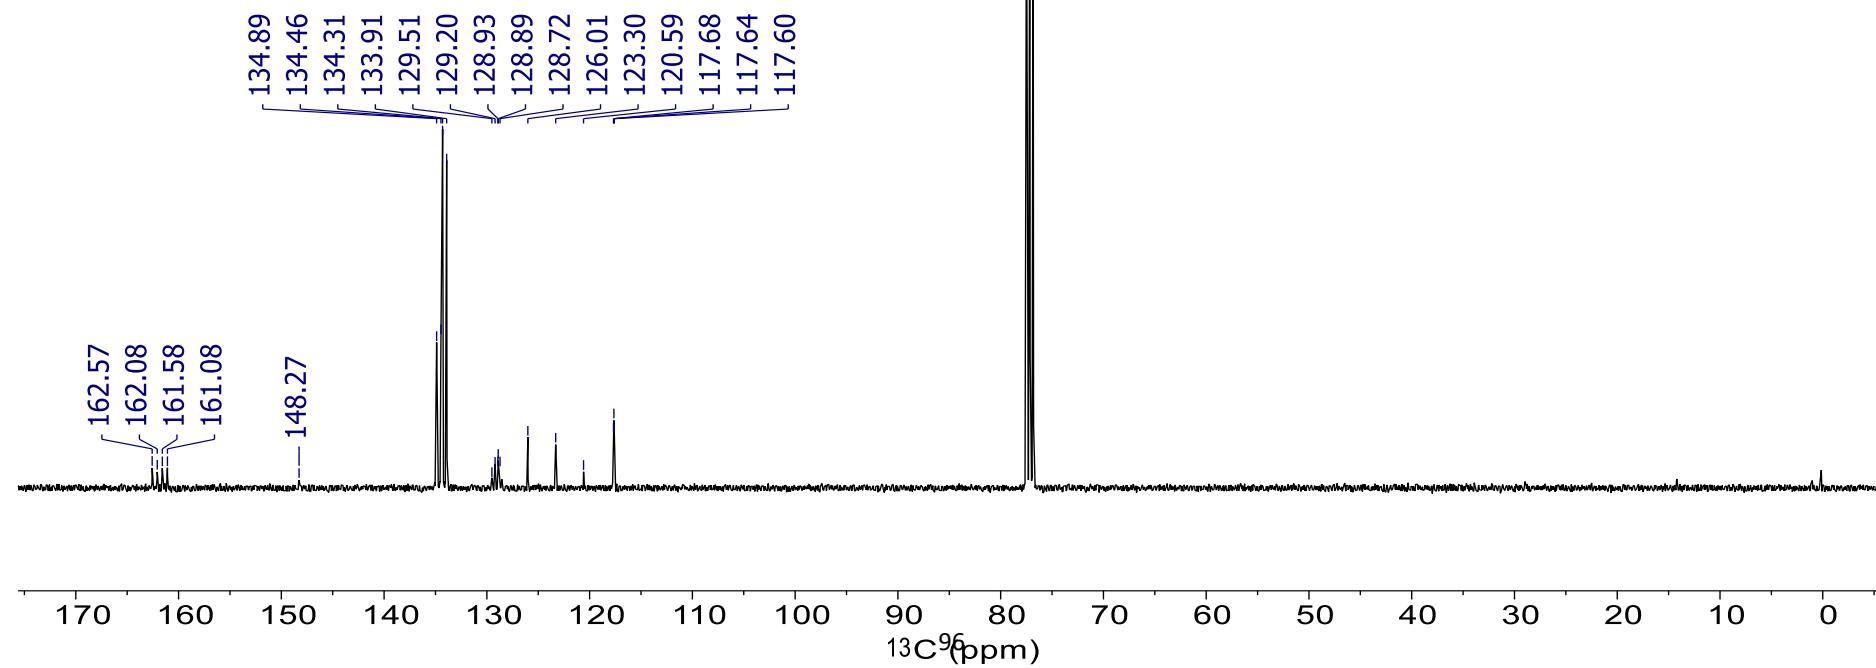



$^{19}\text{F}$  NMR (282 MHz,  $\text{CDCl}_3$ )

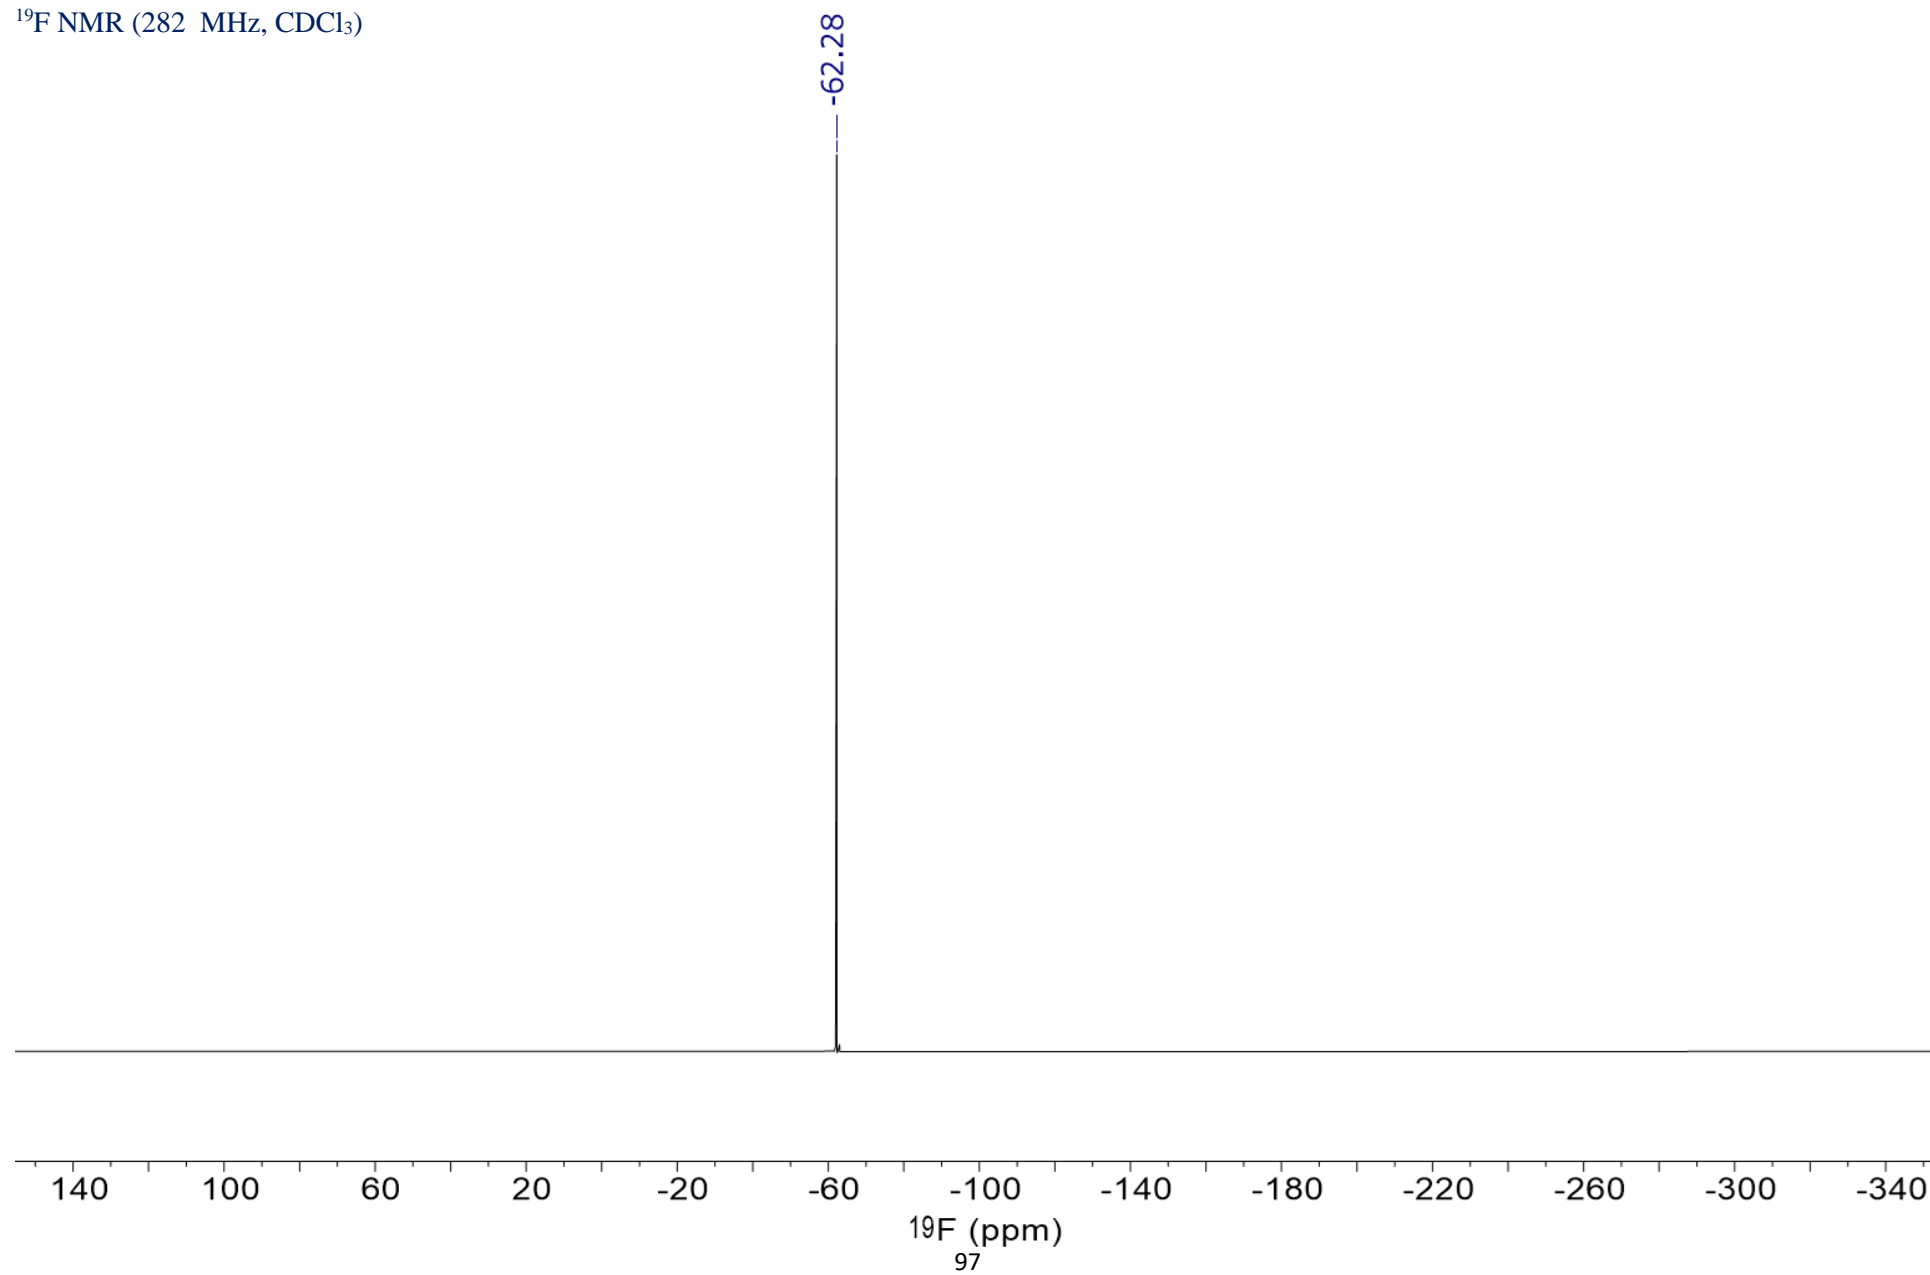

$^1\text{H}$  NMR (600 MHz,  $\text{CDCl}_3$ )

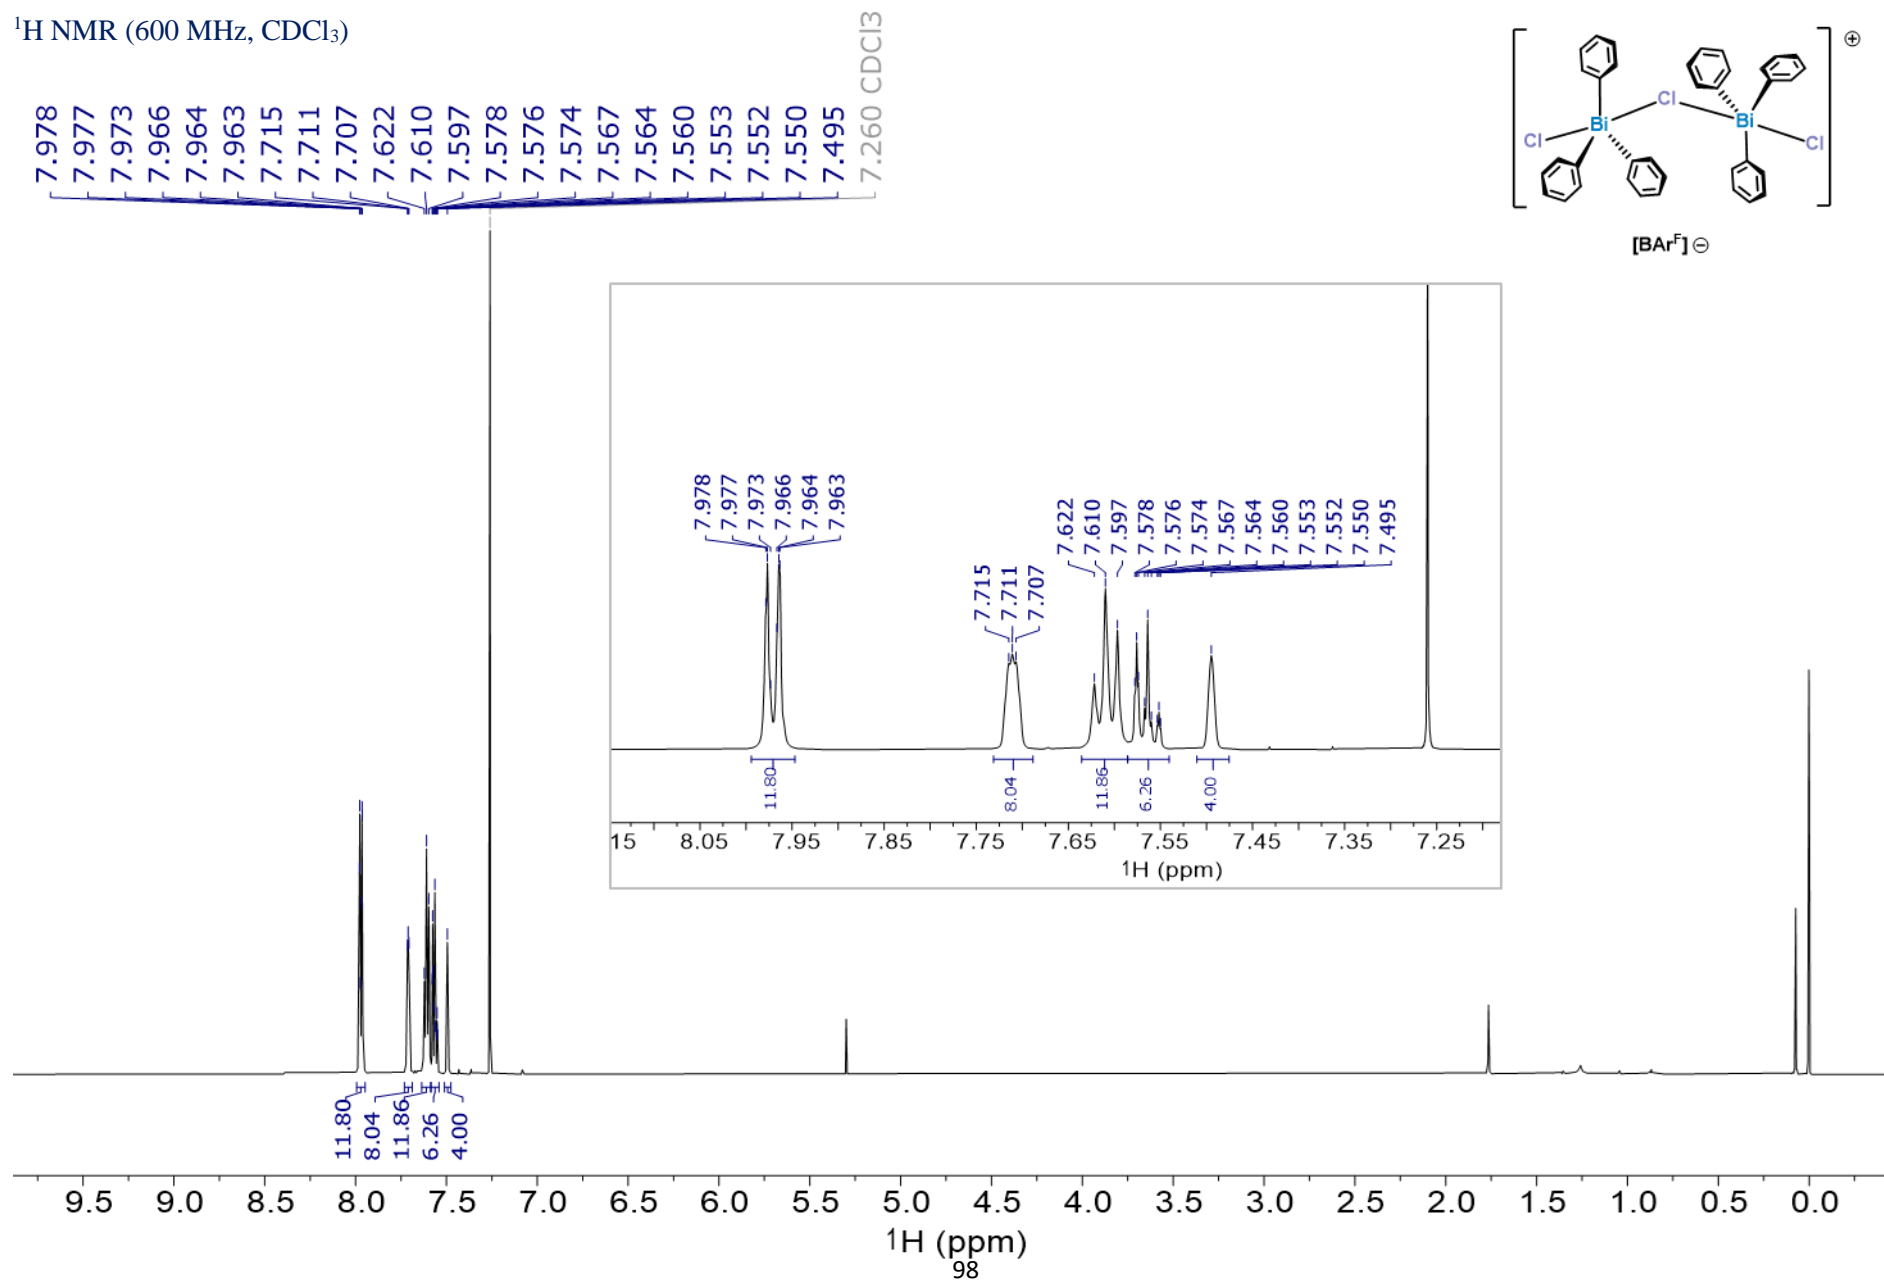

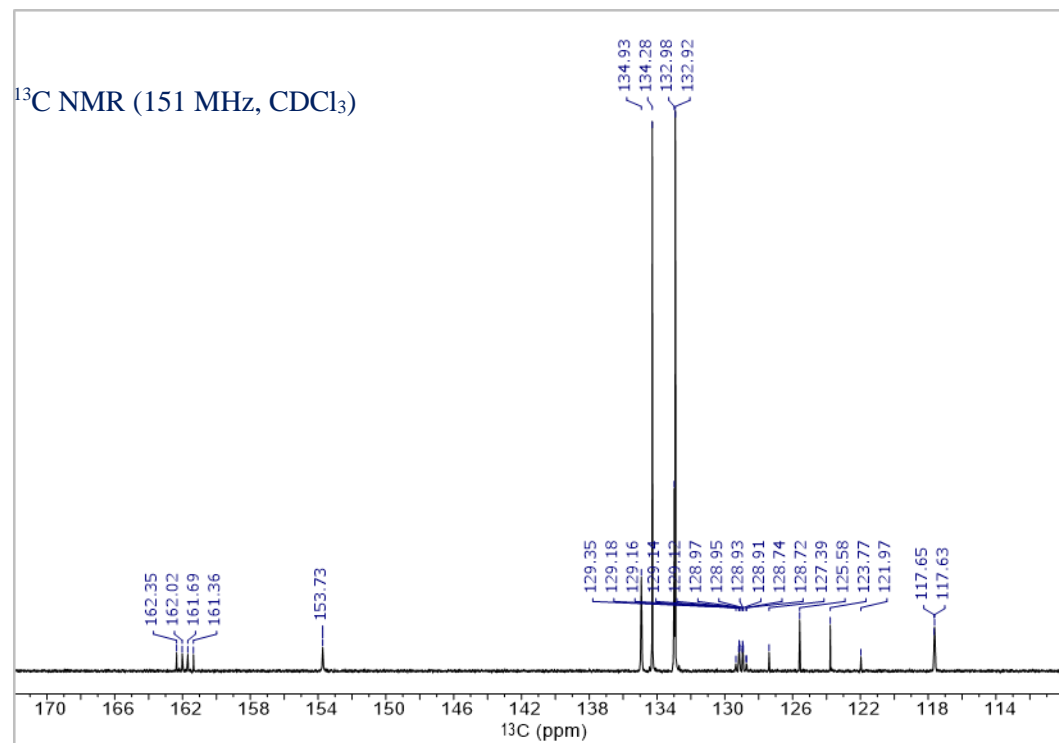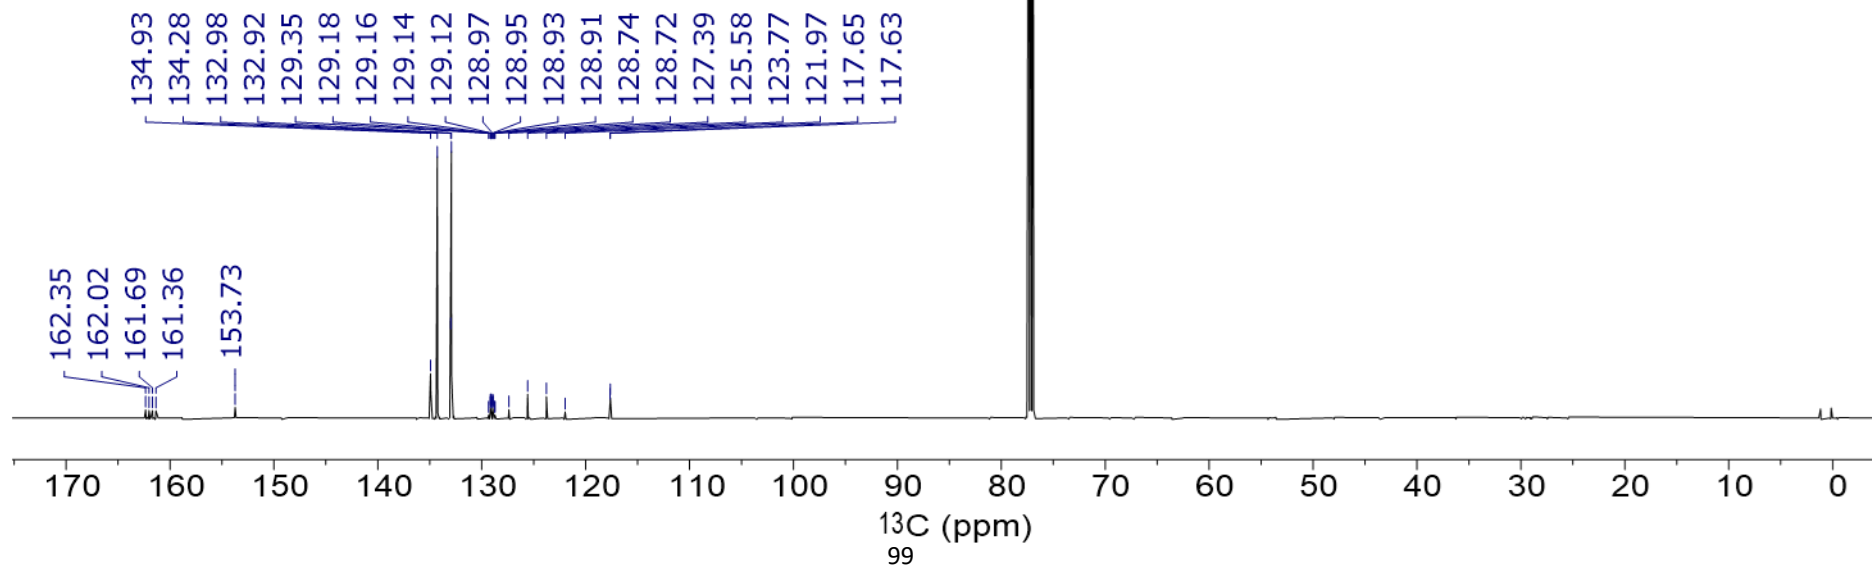

$^{19}\text{F}$  NMR (565 MHz,  $\text{CDCl}_3$ )

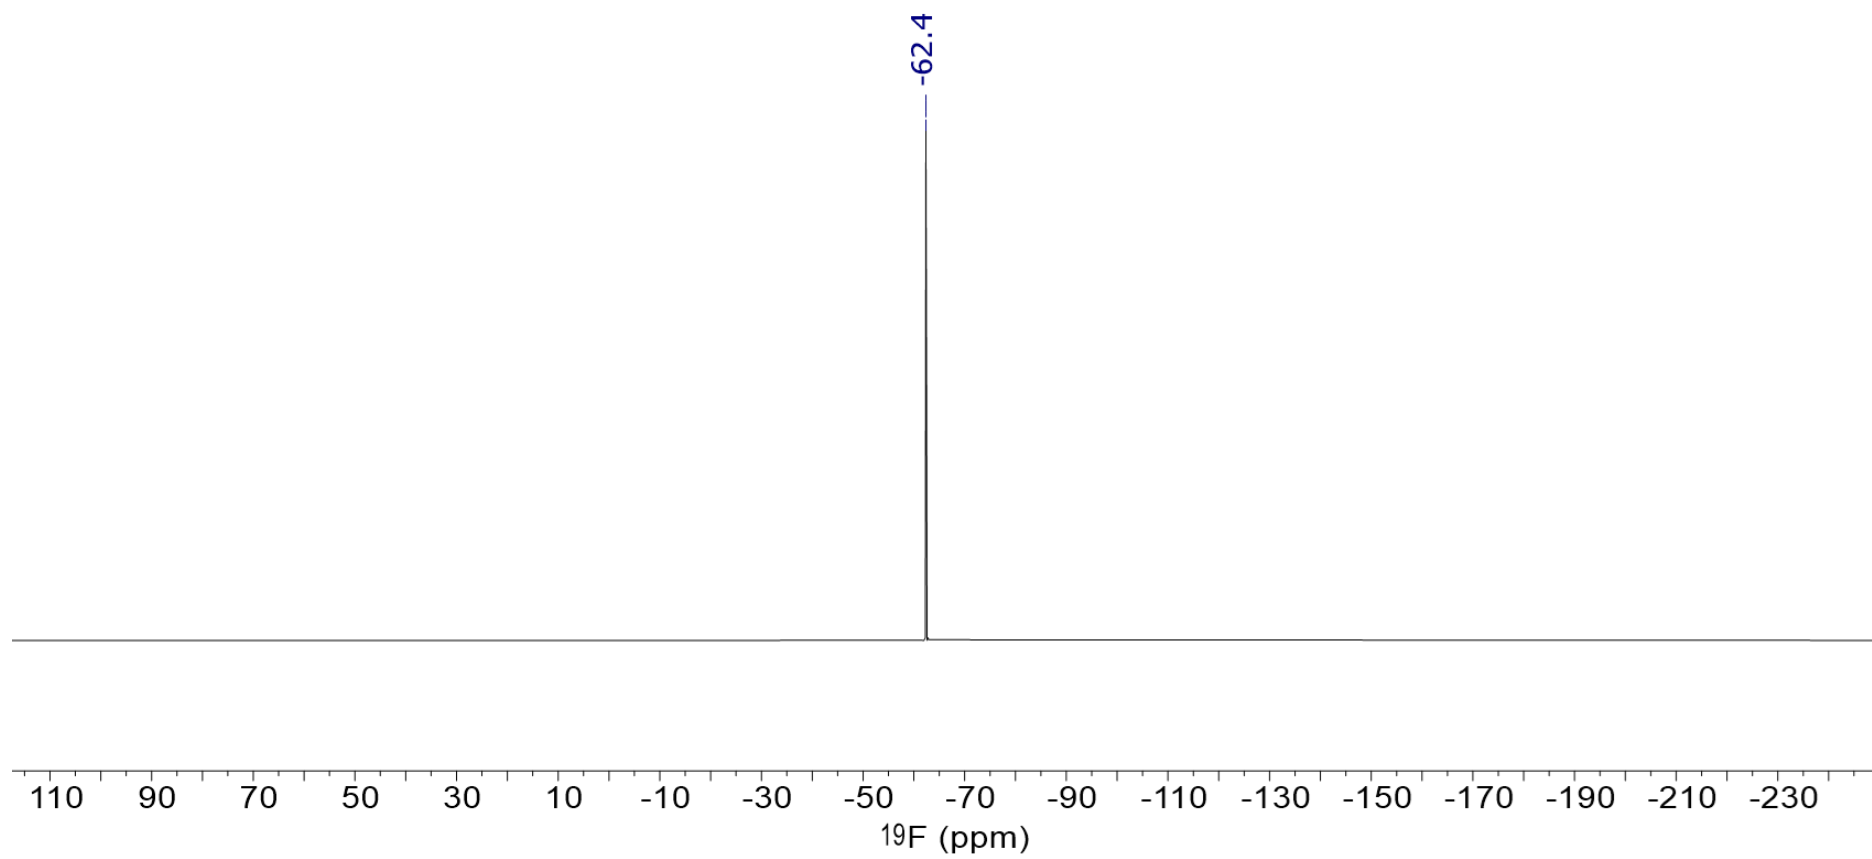

$^1\text{H}$  NMR (600 MHz,  $\text{CDCl}_3$ )

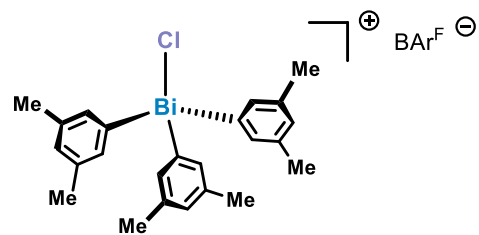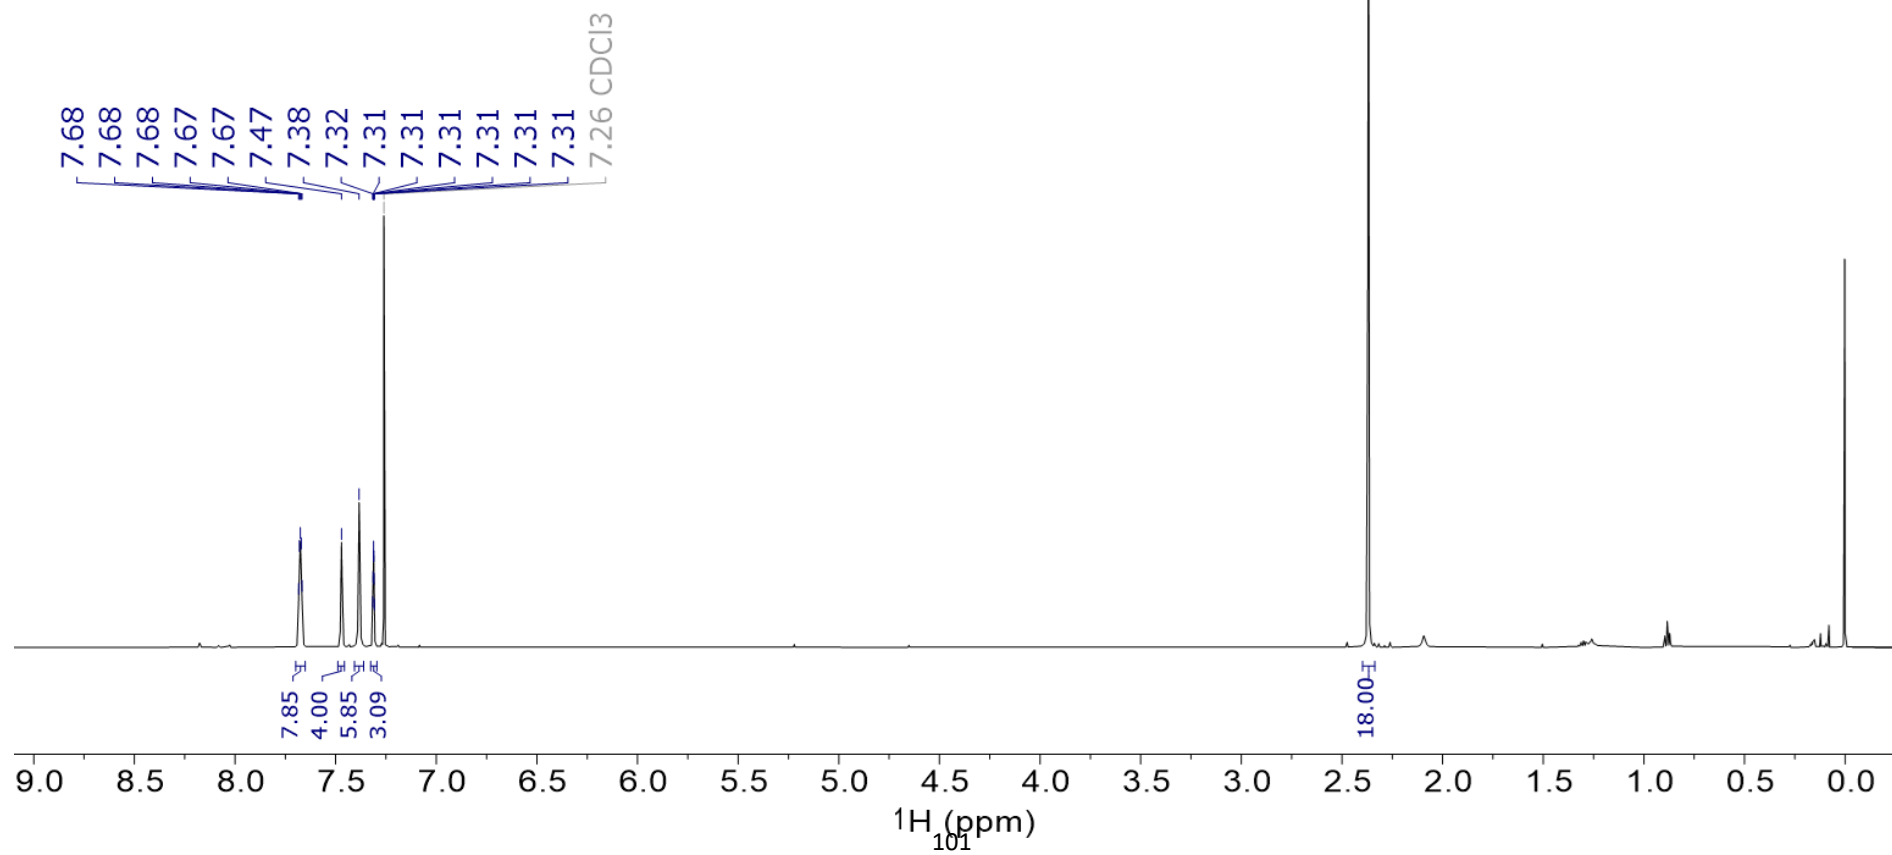

$^{13}\text{C}$  NMR (151 MHz,  $\text{CDCl}_3$ )

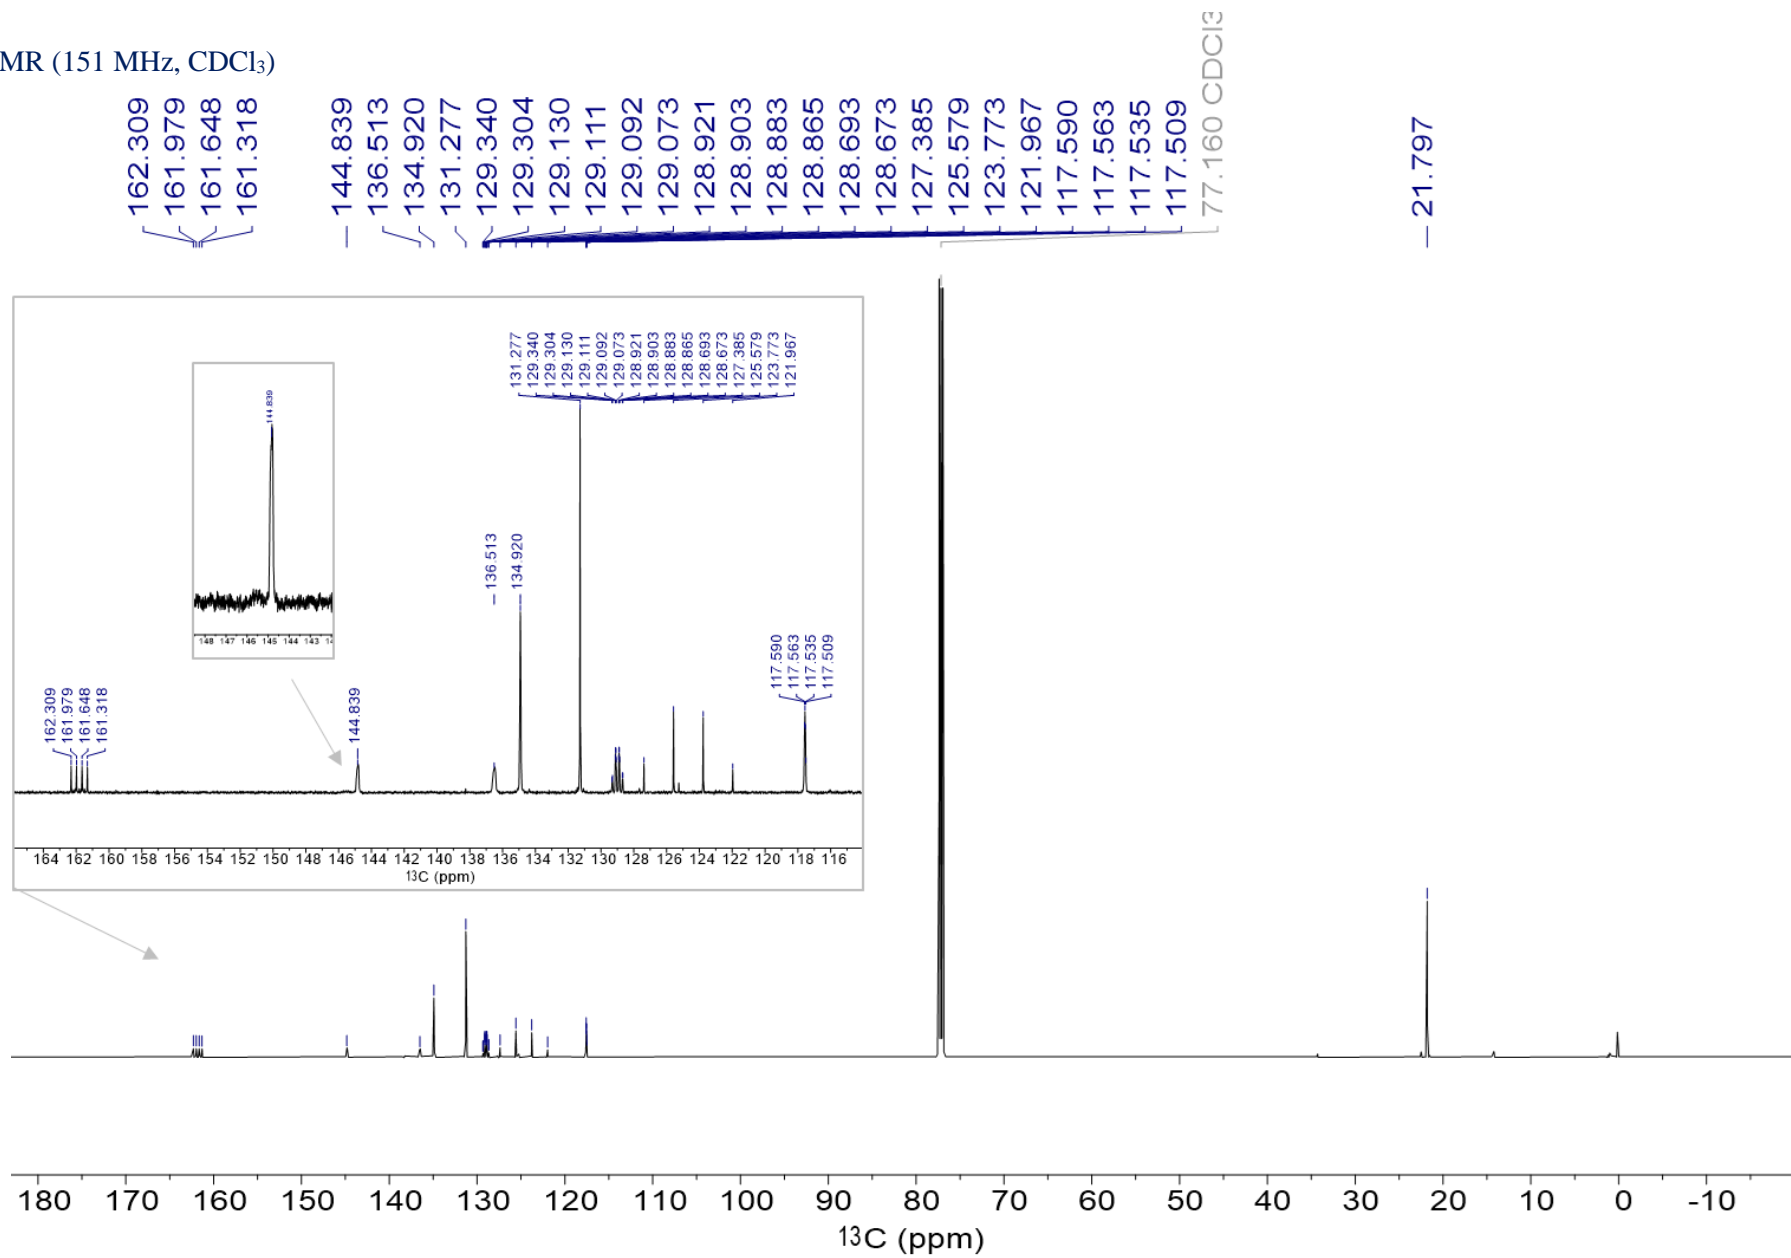

$^{19}\text{F}$  NMR (564 MHz,  $\text{CDCl}_3$ )

-62.4

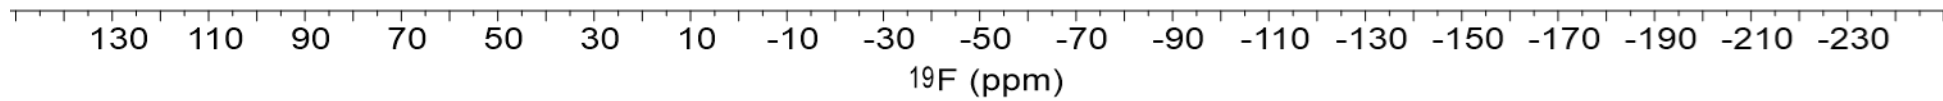

$^1\text{H}$  NMR (400 MHz,  $\text{CDCl}_3$ )

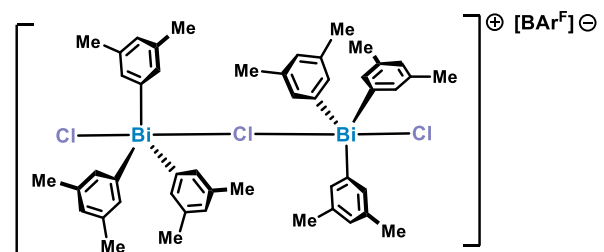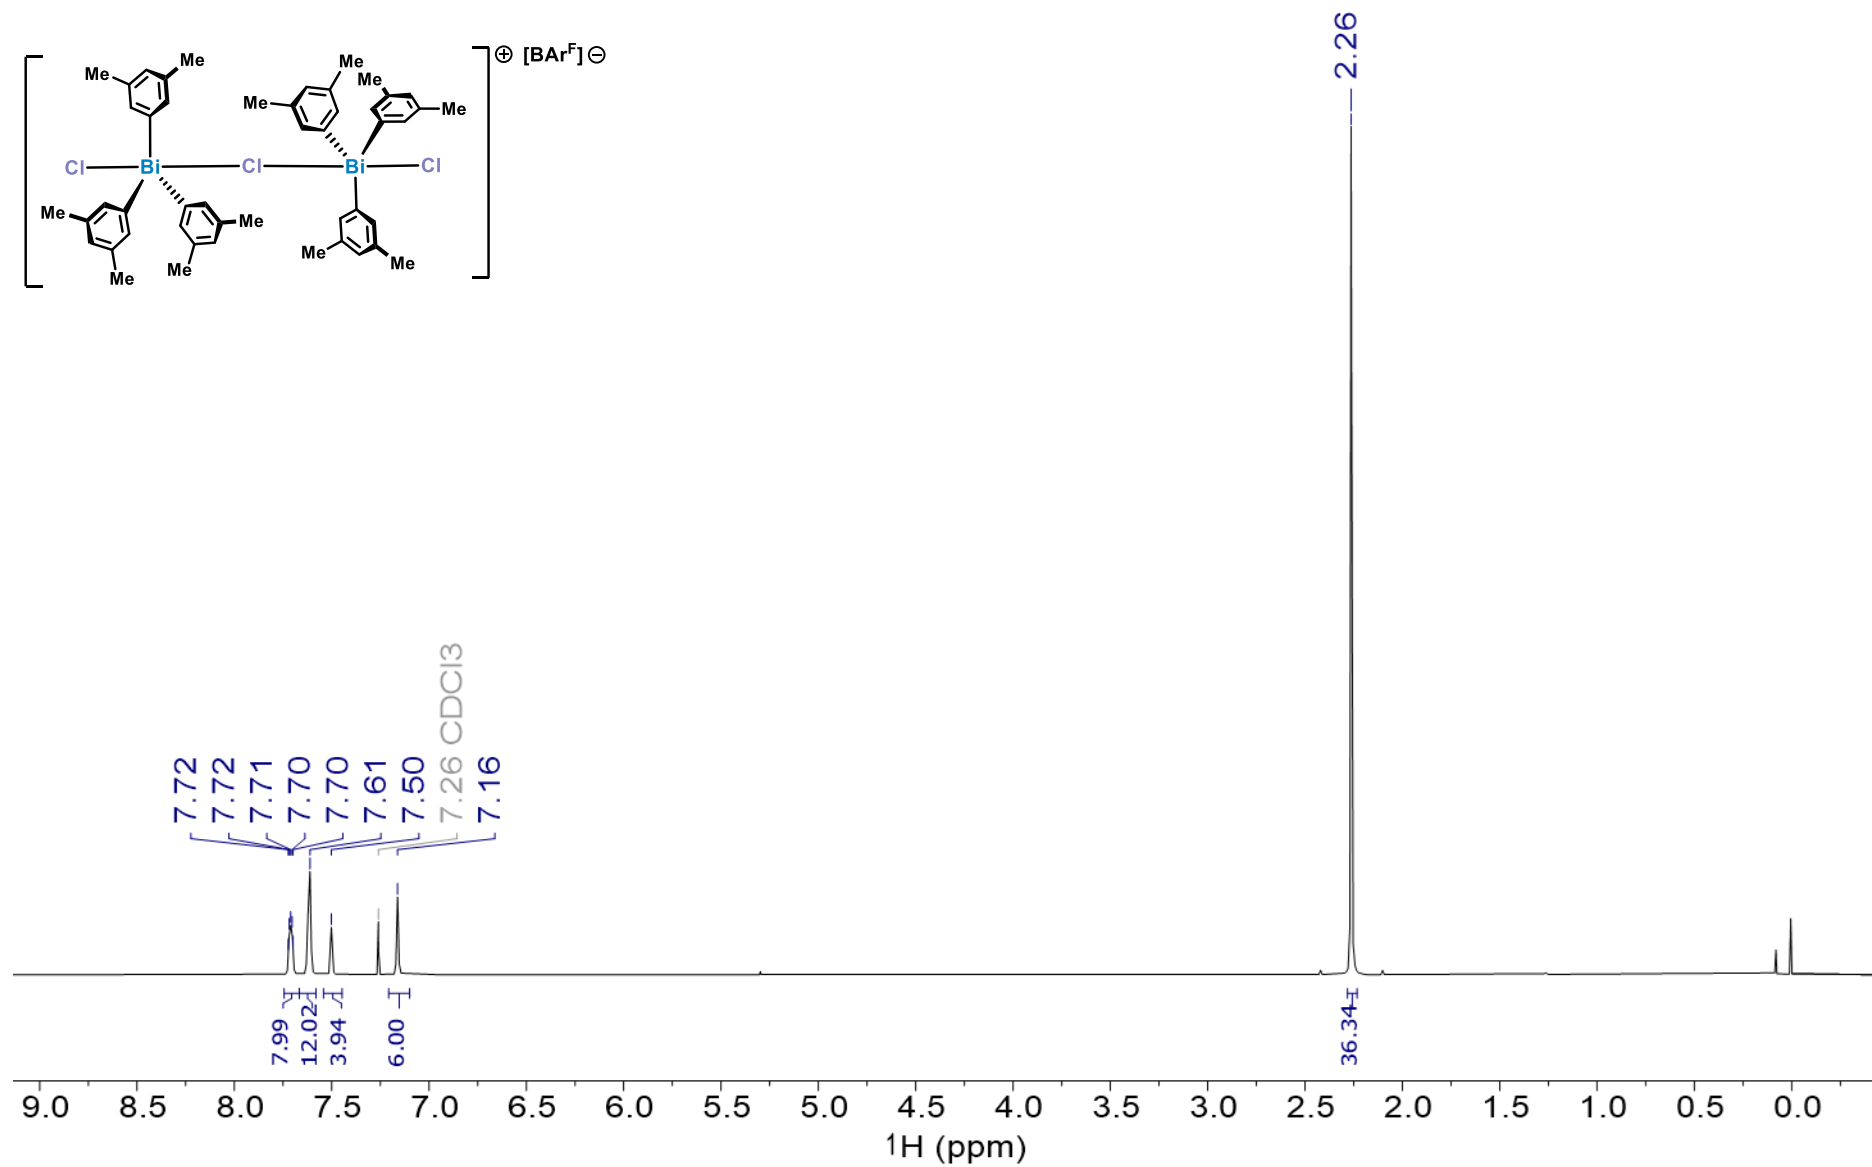



$^{13}\text{C}$  NMR (101 MHz,  $\text{CDCl}_3$ )

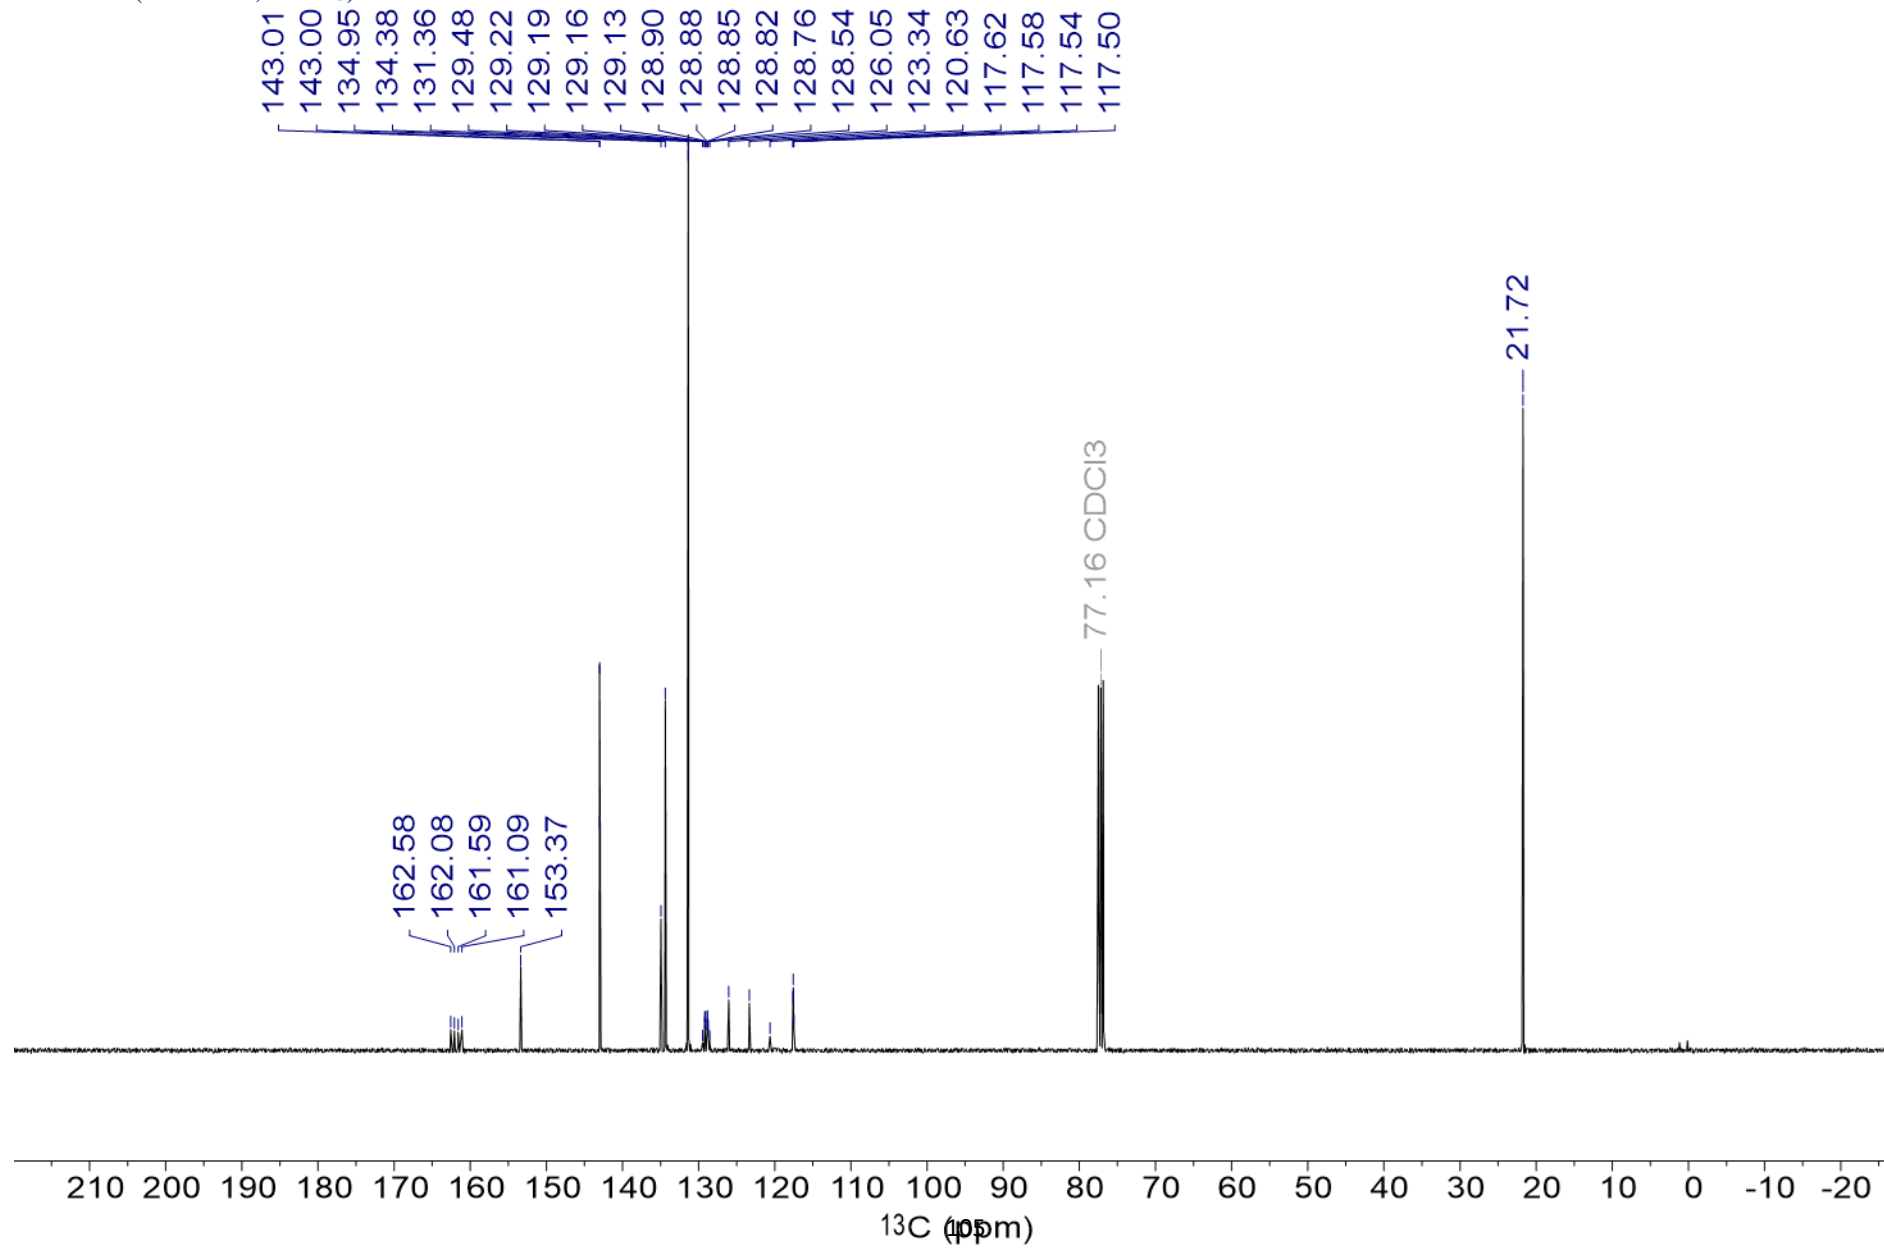

$^{19}\text{F}$  NMR (282 MHz,  $\text{CDCl}_3$ )

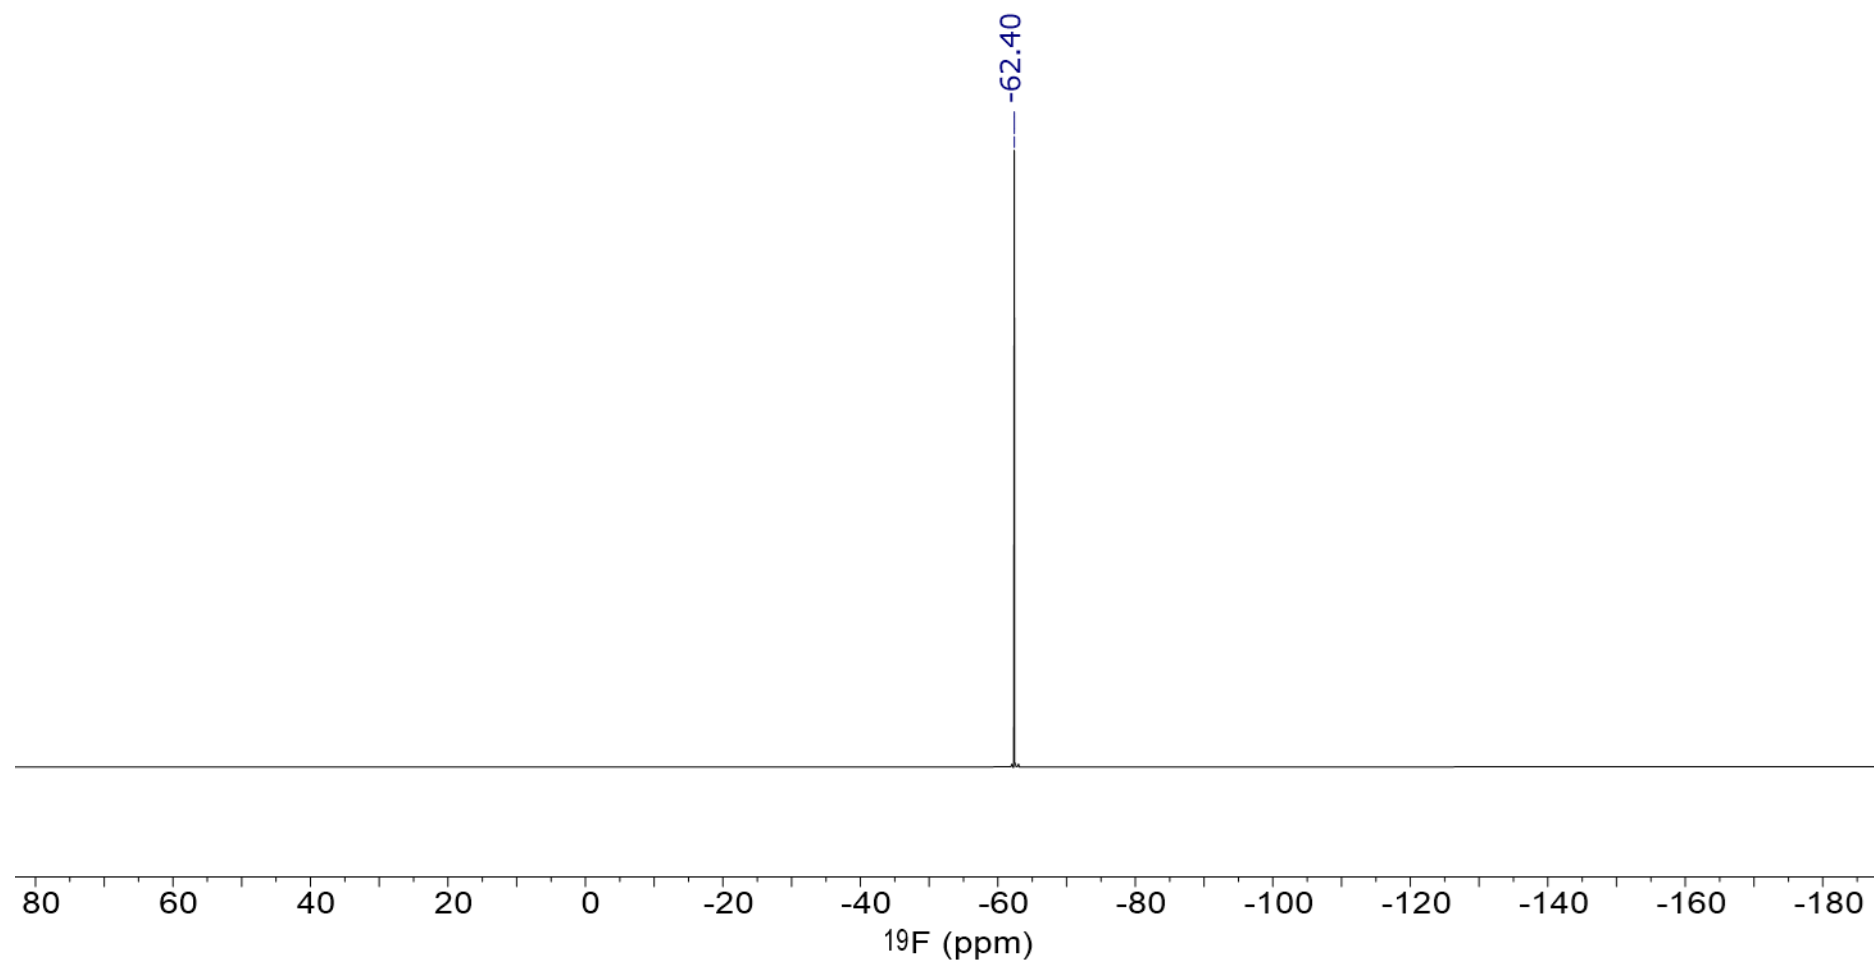

$^1\text{H}$  NMR (300 MHz,  $\text{CDCl}_3$ ) 1.0 equiv.

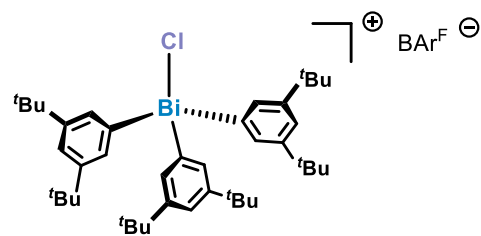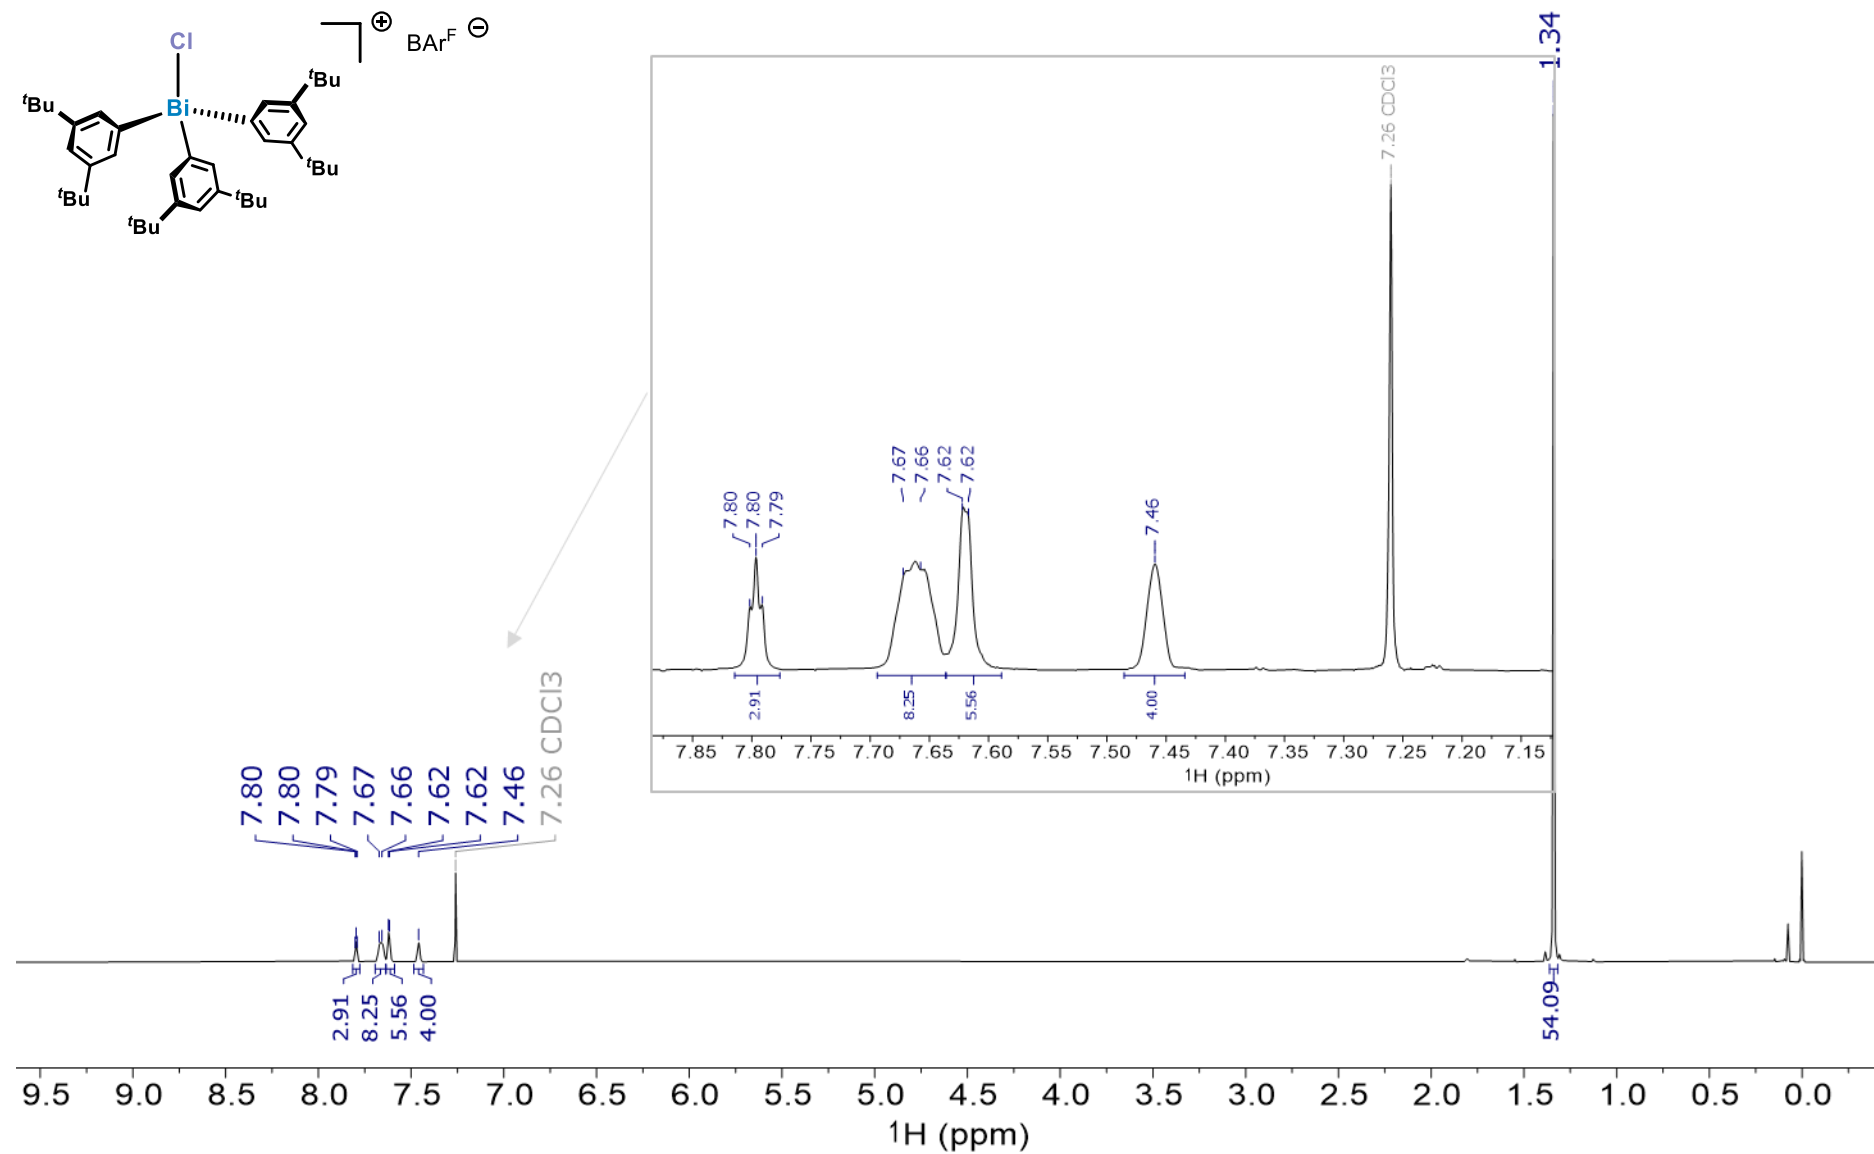

$^{13}\text{C}$  NMR (151 MHz,  $\text{CDCl}_3$ )

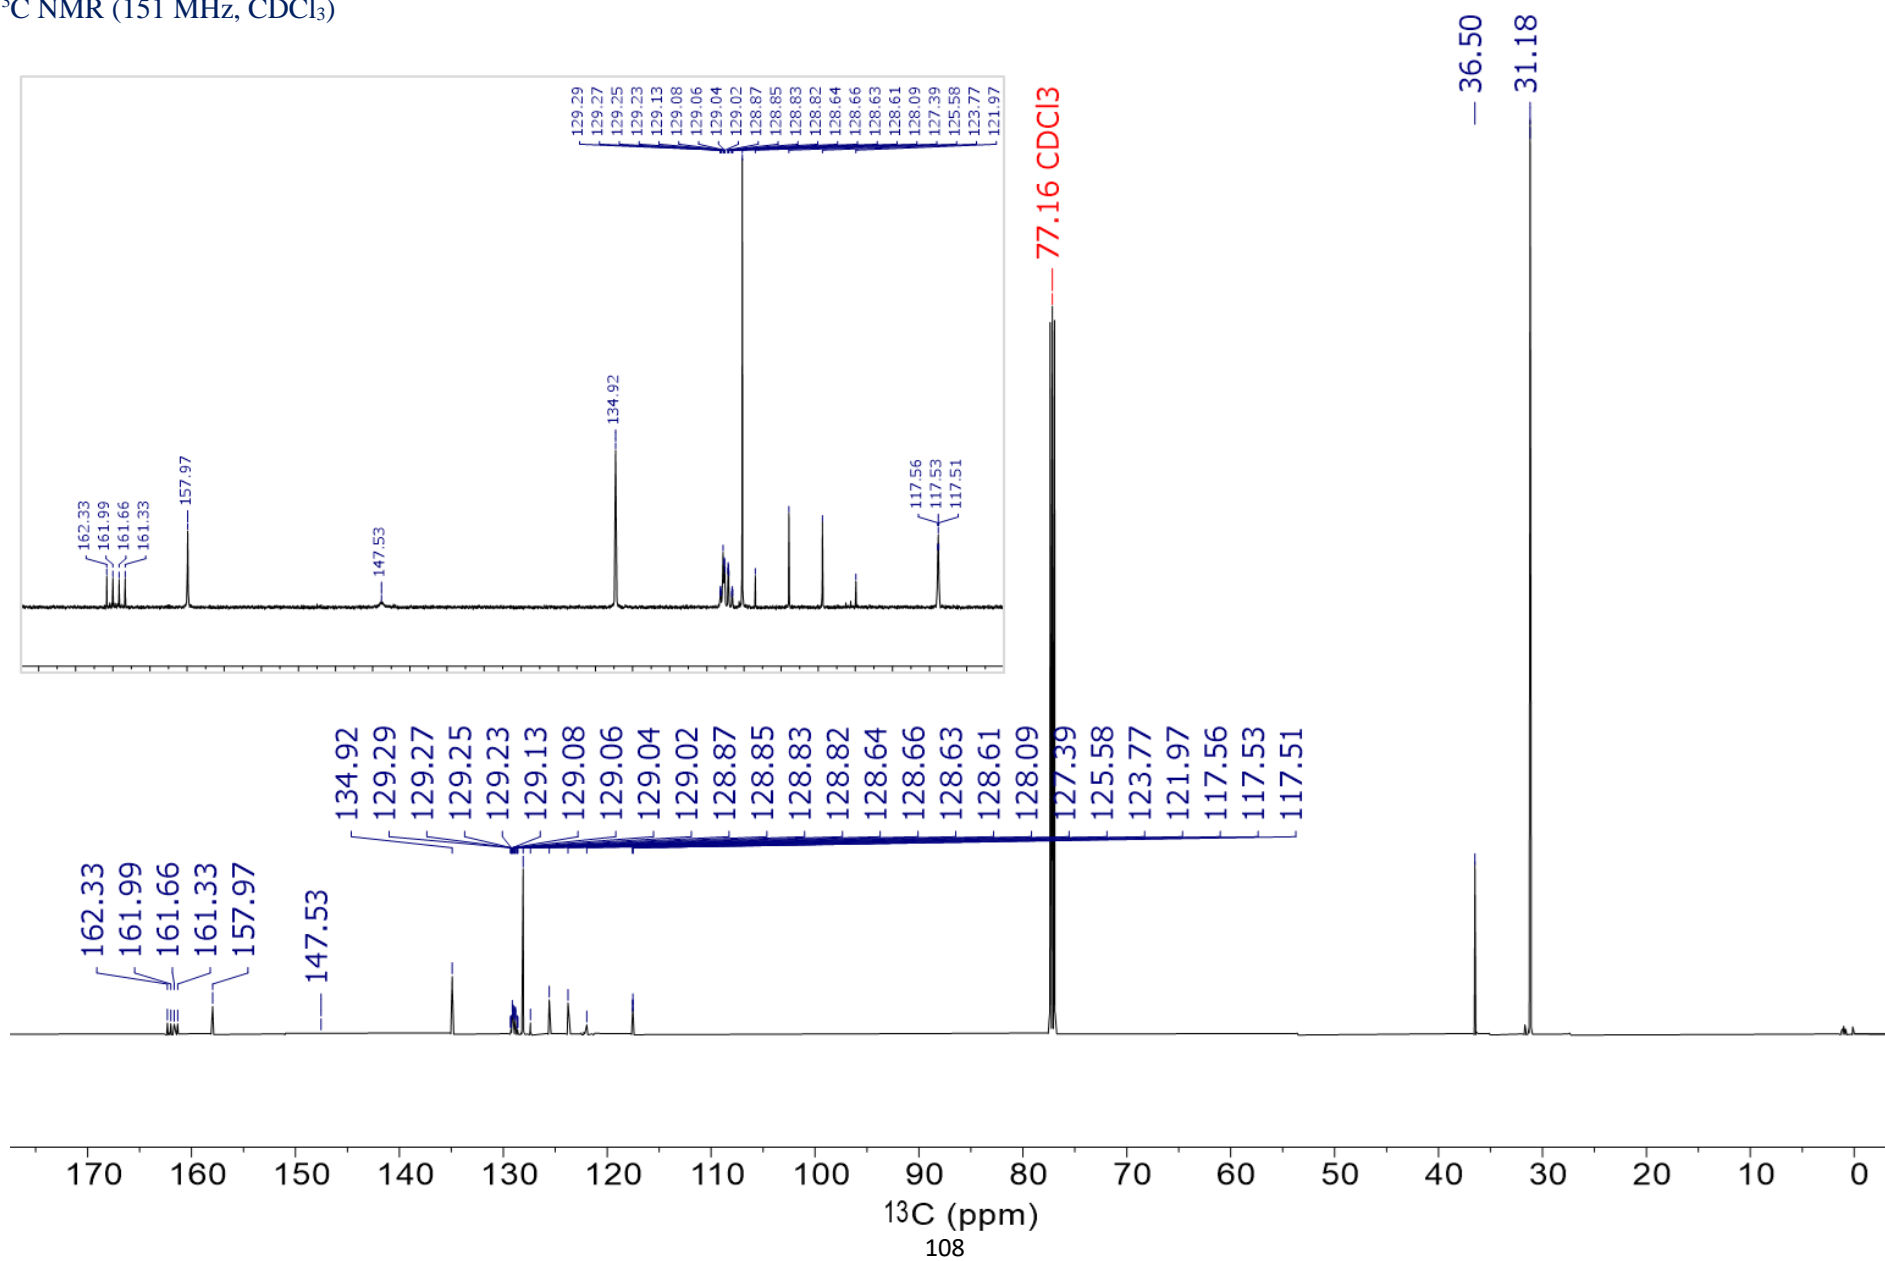

$^{19}\text{F}$  NMR (564 MHz,  $\text{CDCl}_3$ )

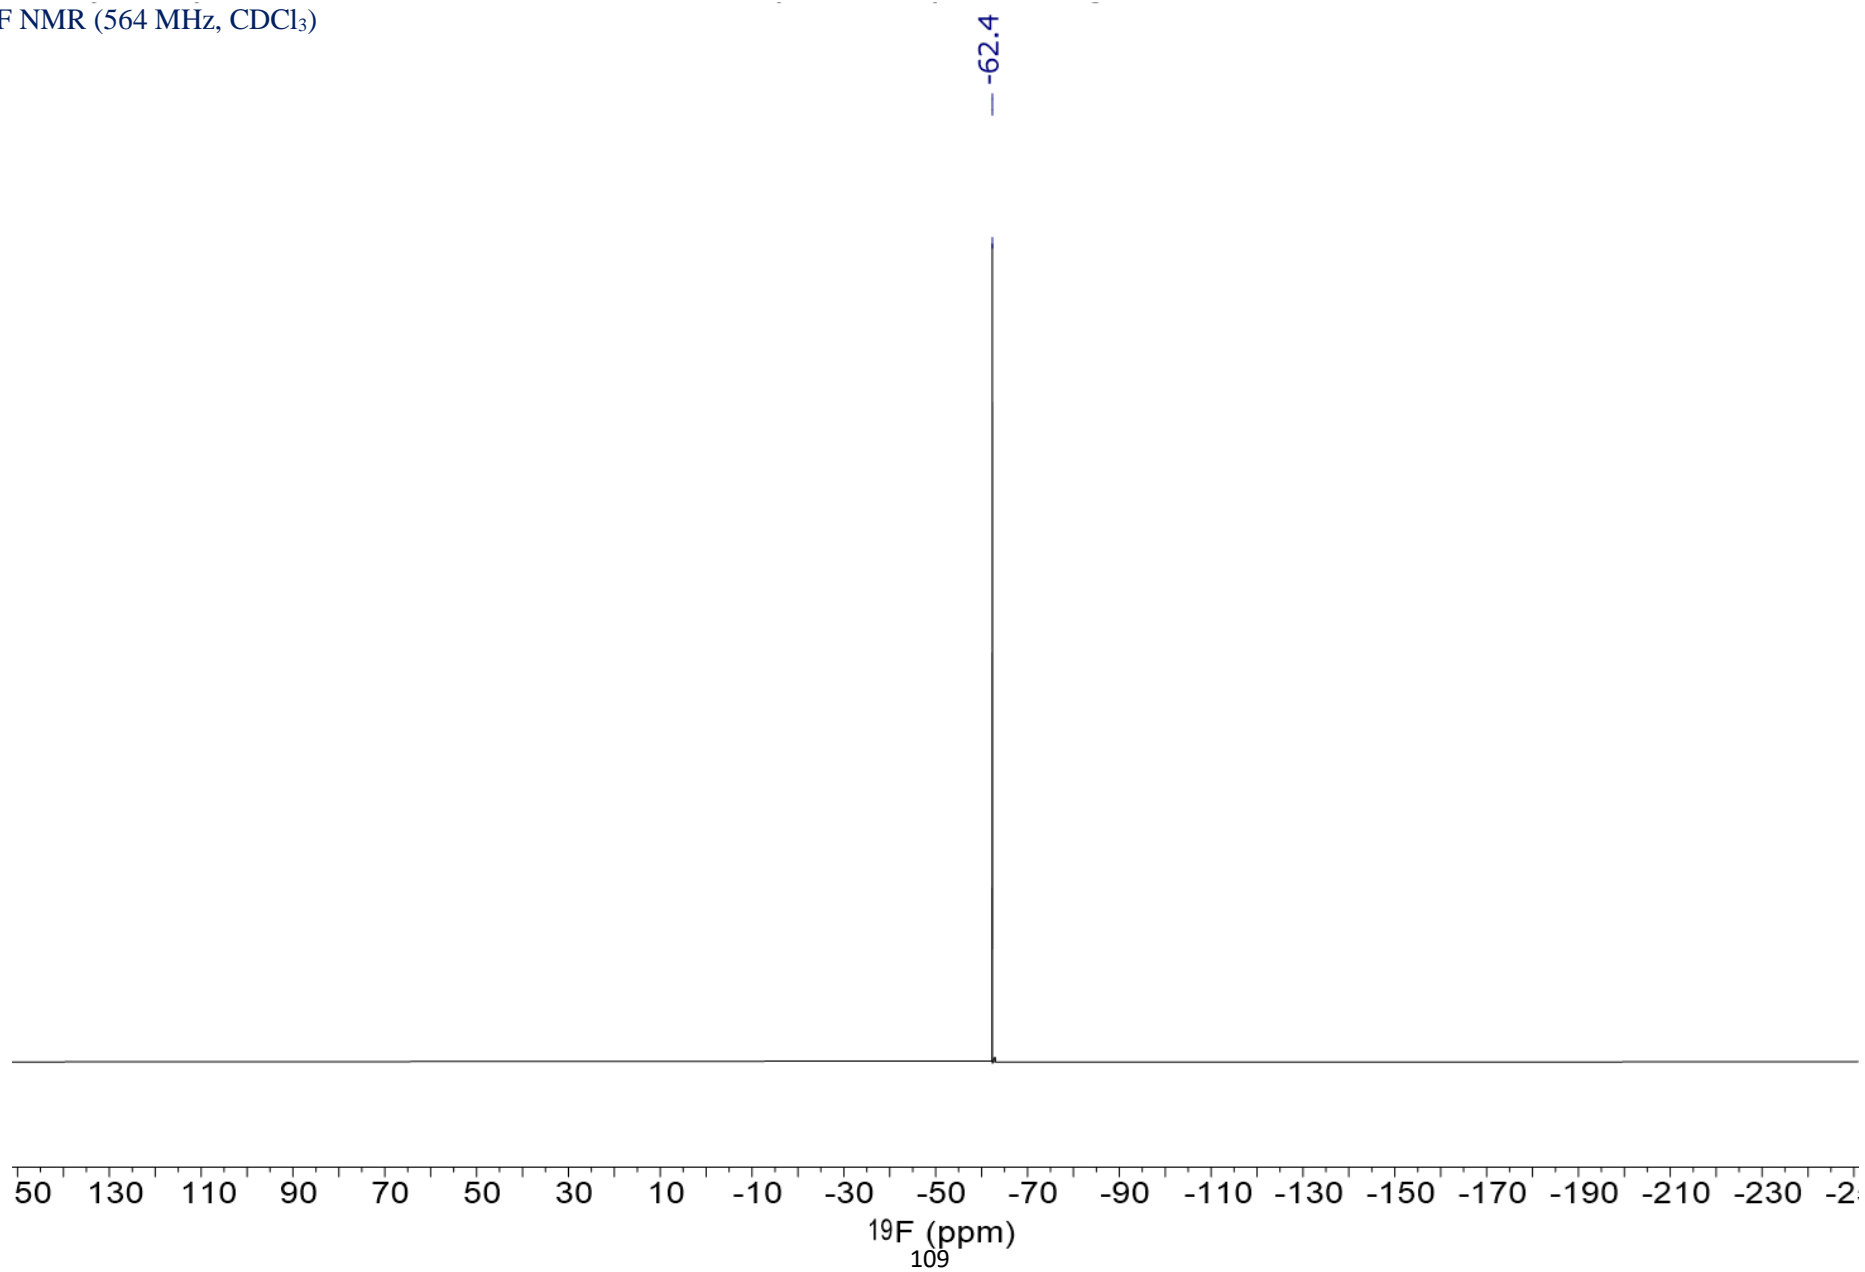

$^1\text{H}$  NMR (600 MHz,  $\text{CDCl}_3$ ) 0.5 equiv.

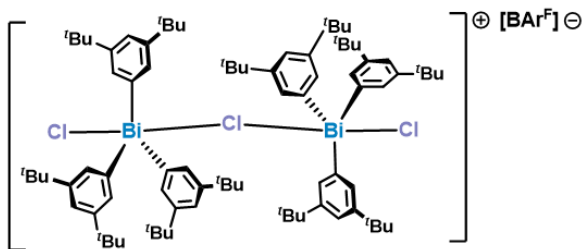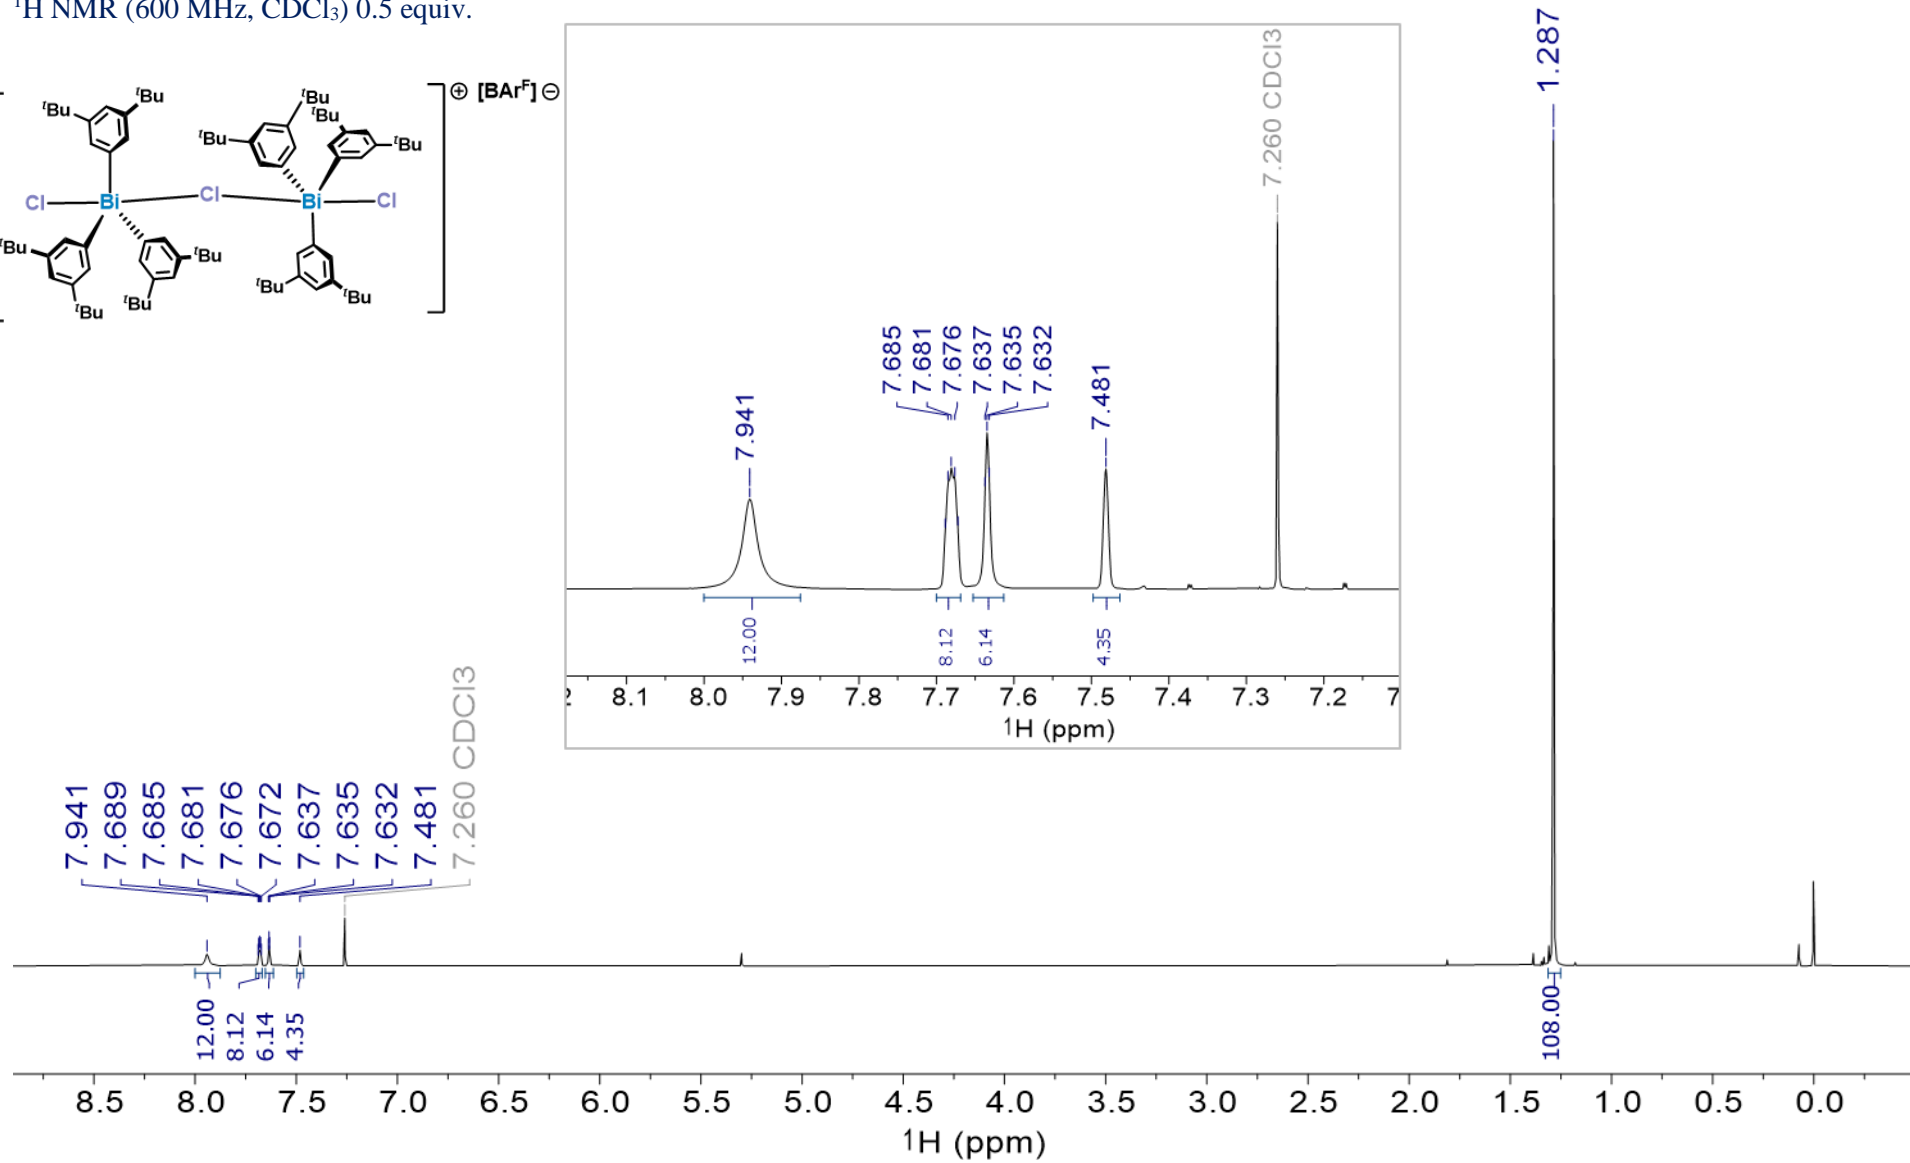

$^{13}\text{C}$  NMR (151 MHz,  $\text{CDCl}_3$ )

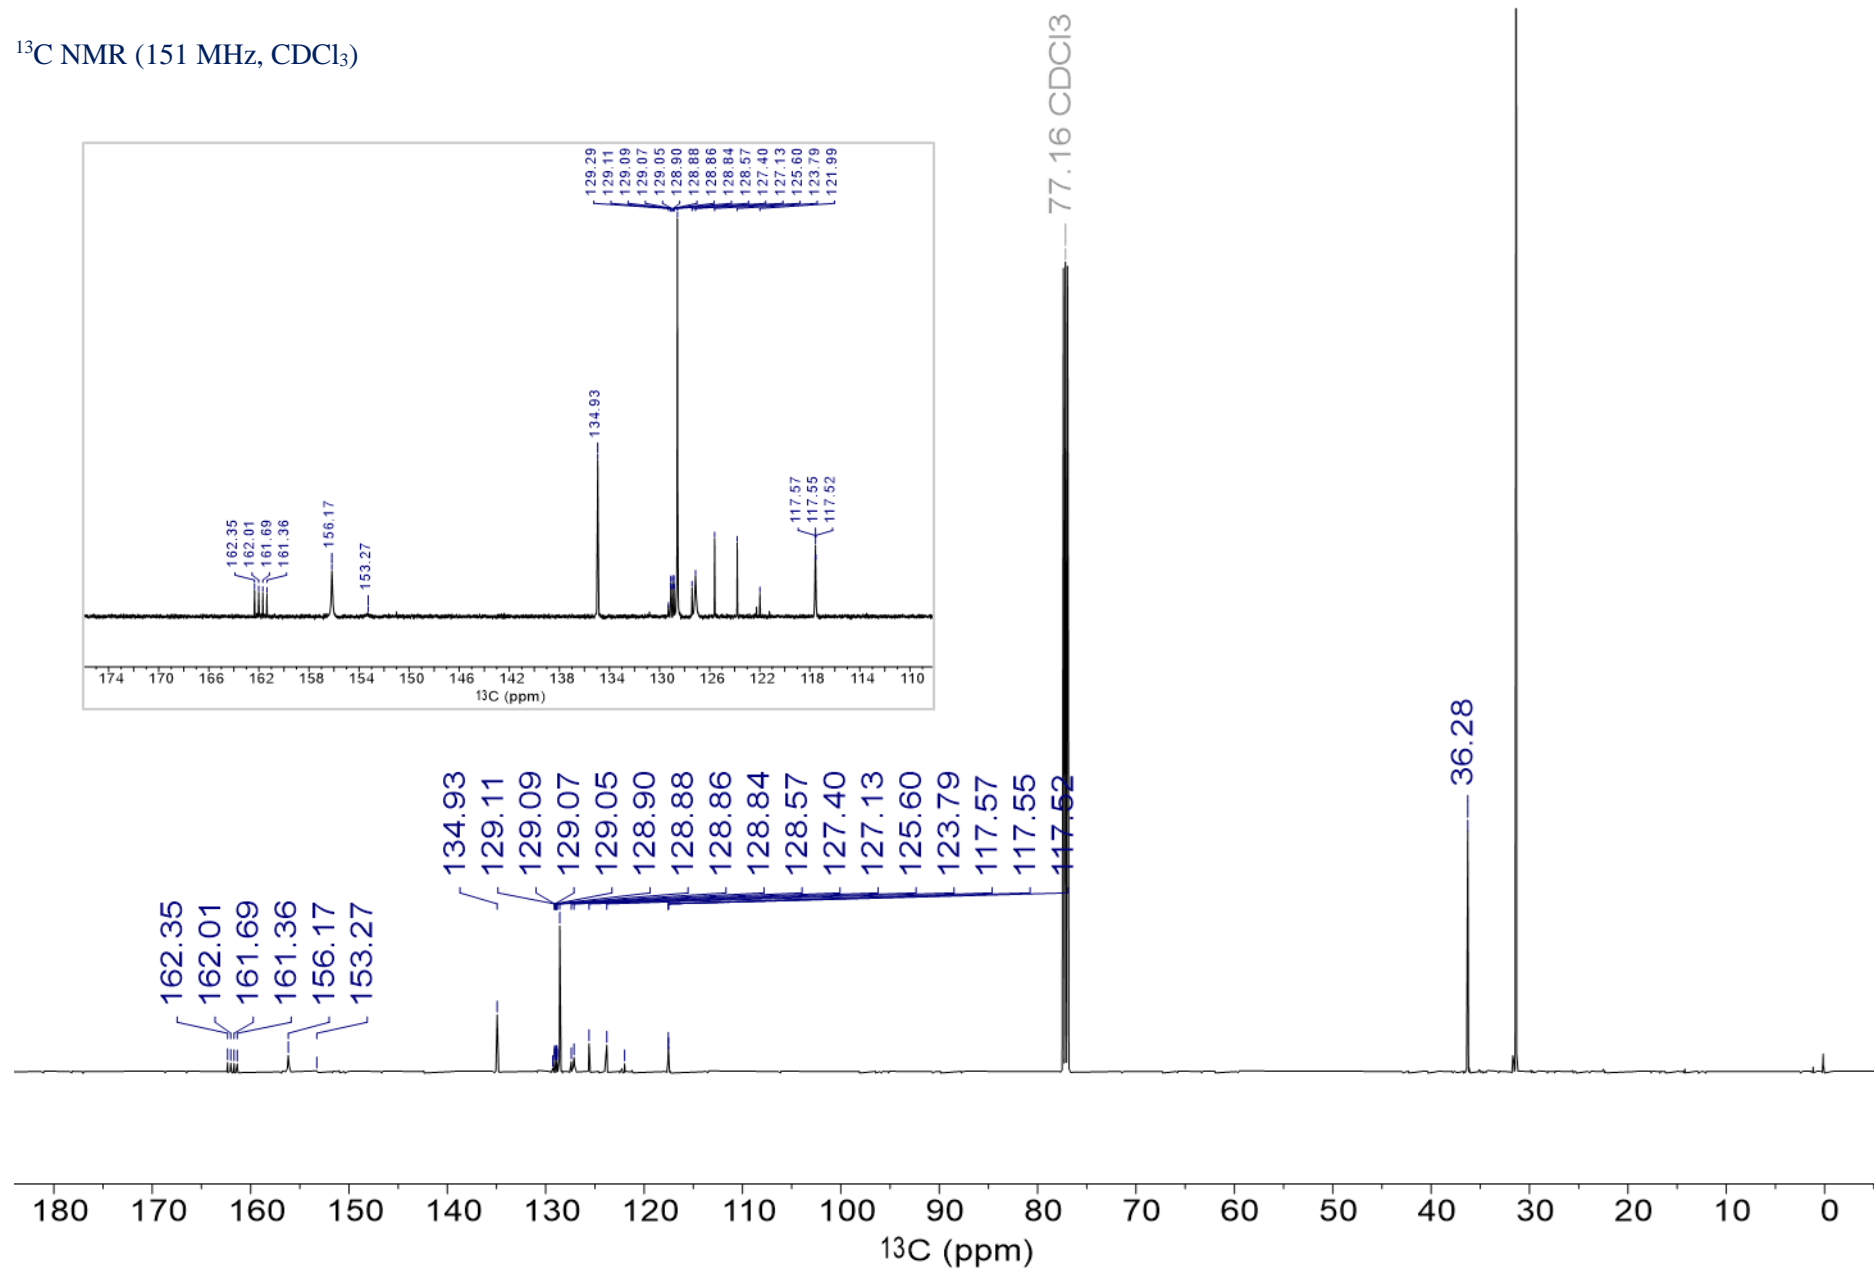

$^{19}\text{F}$  NMR (564 MHz,  $\text{CDCl}_3$ )

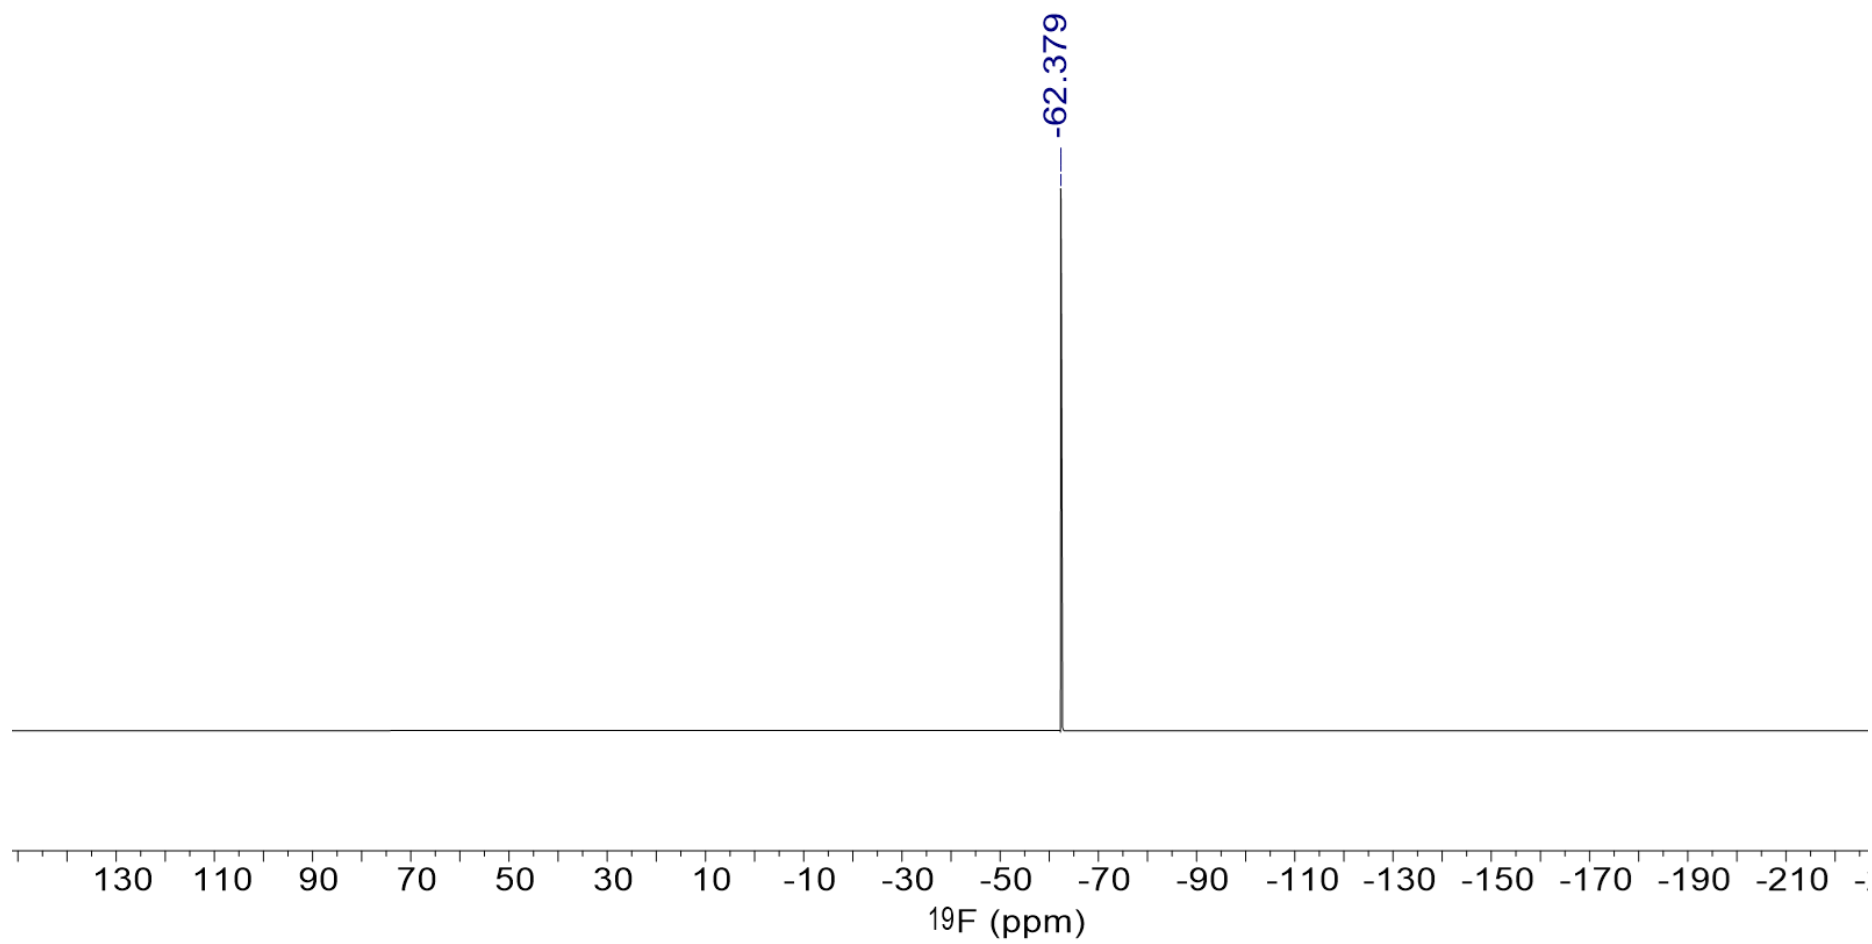



$^1\text{H}$  NMR (400 MHz,  $\text{CDCl}_3$ )

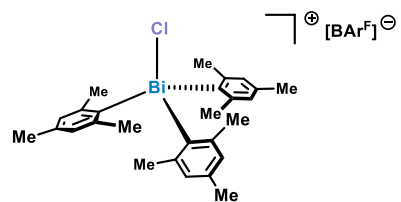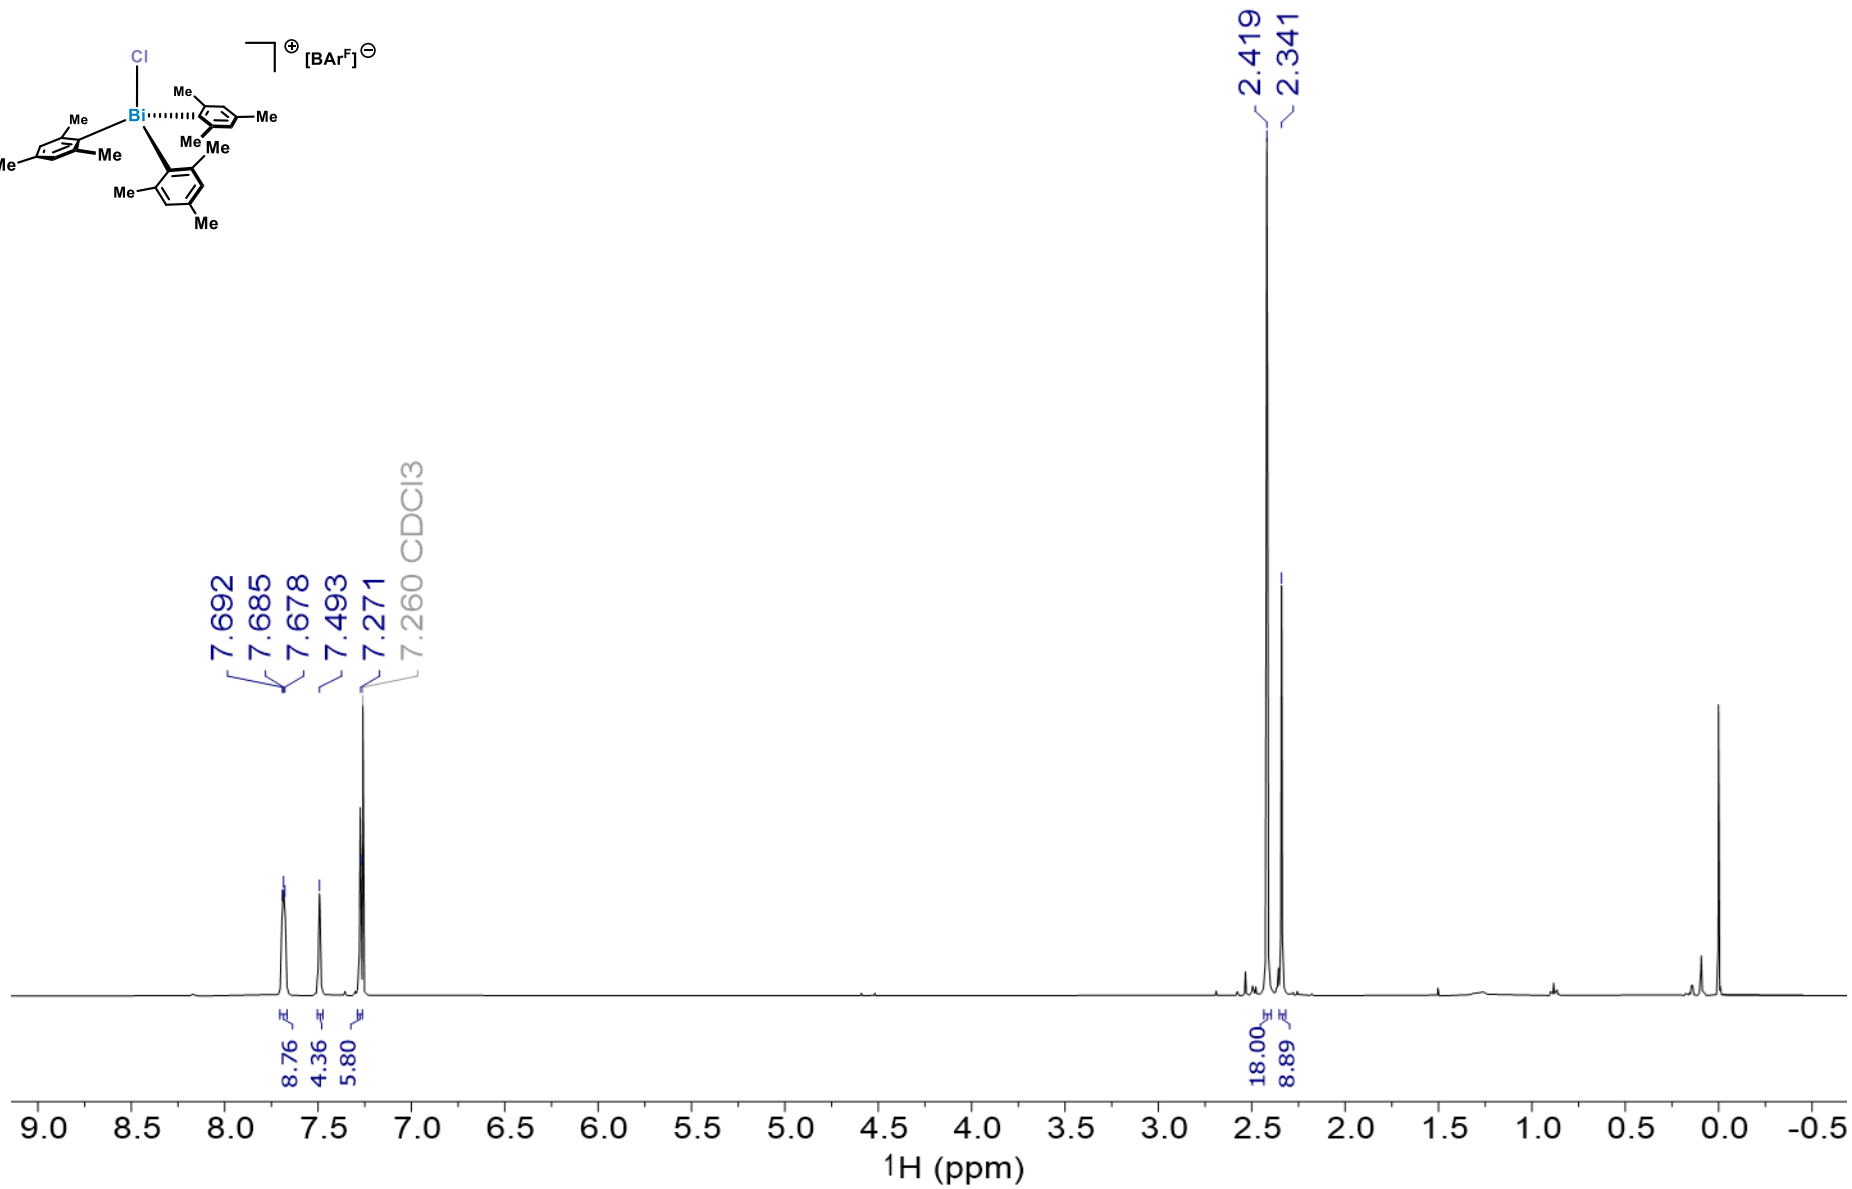

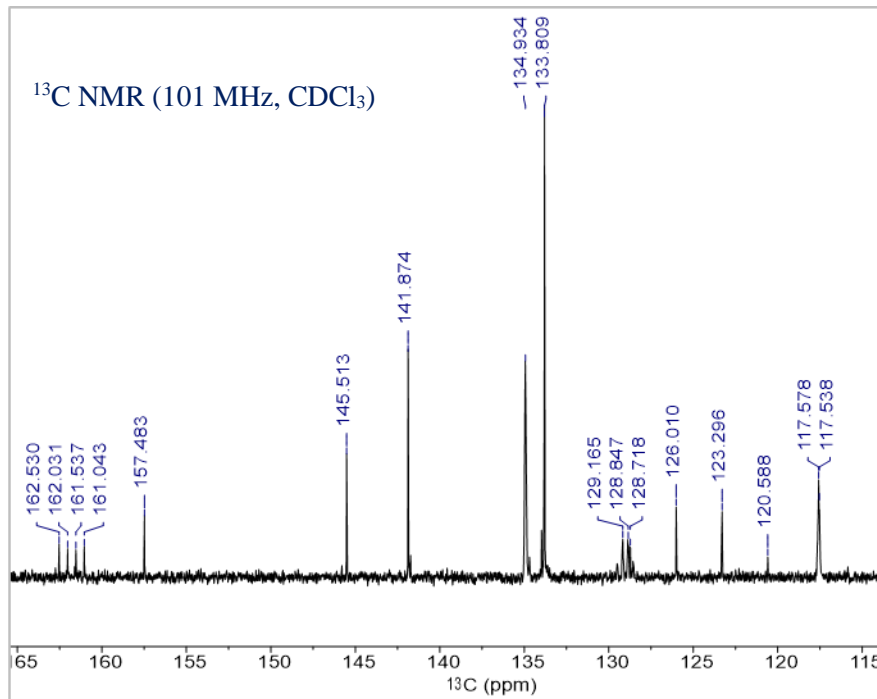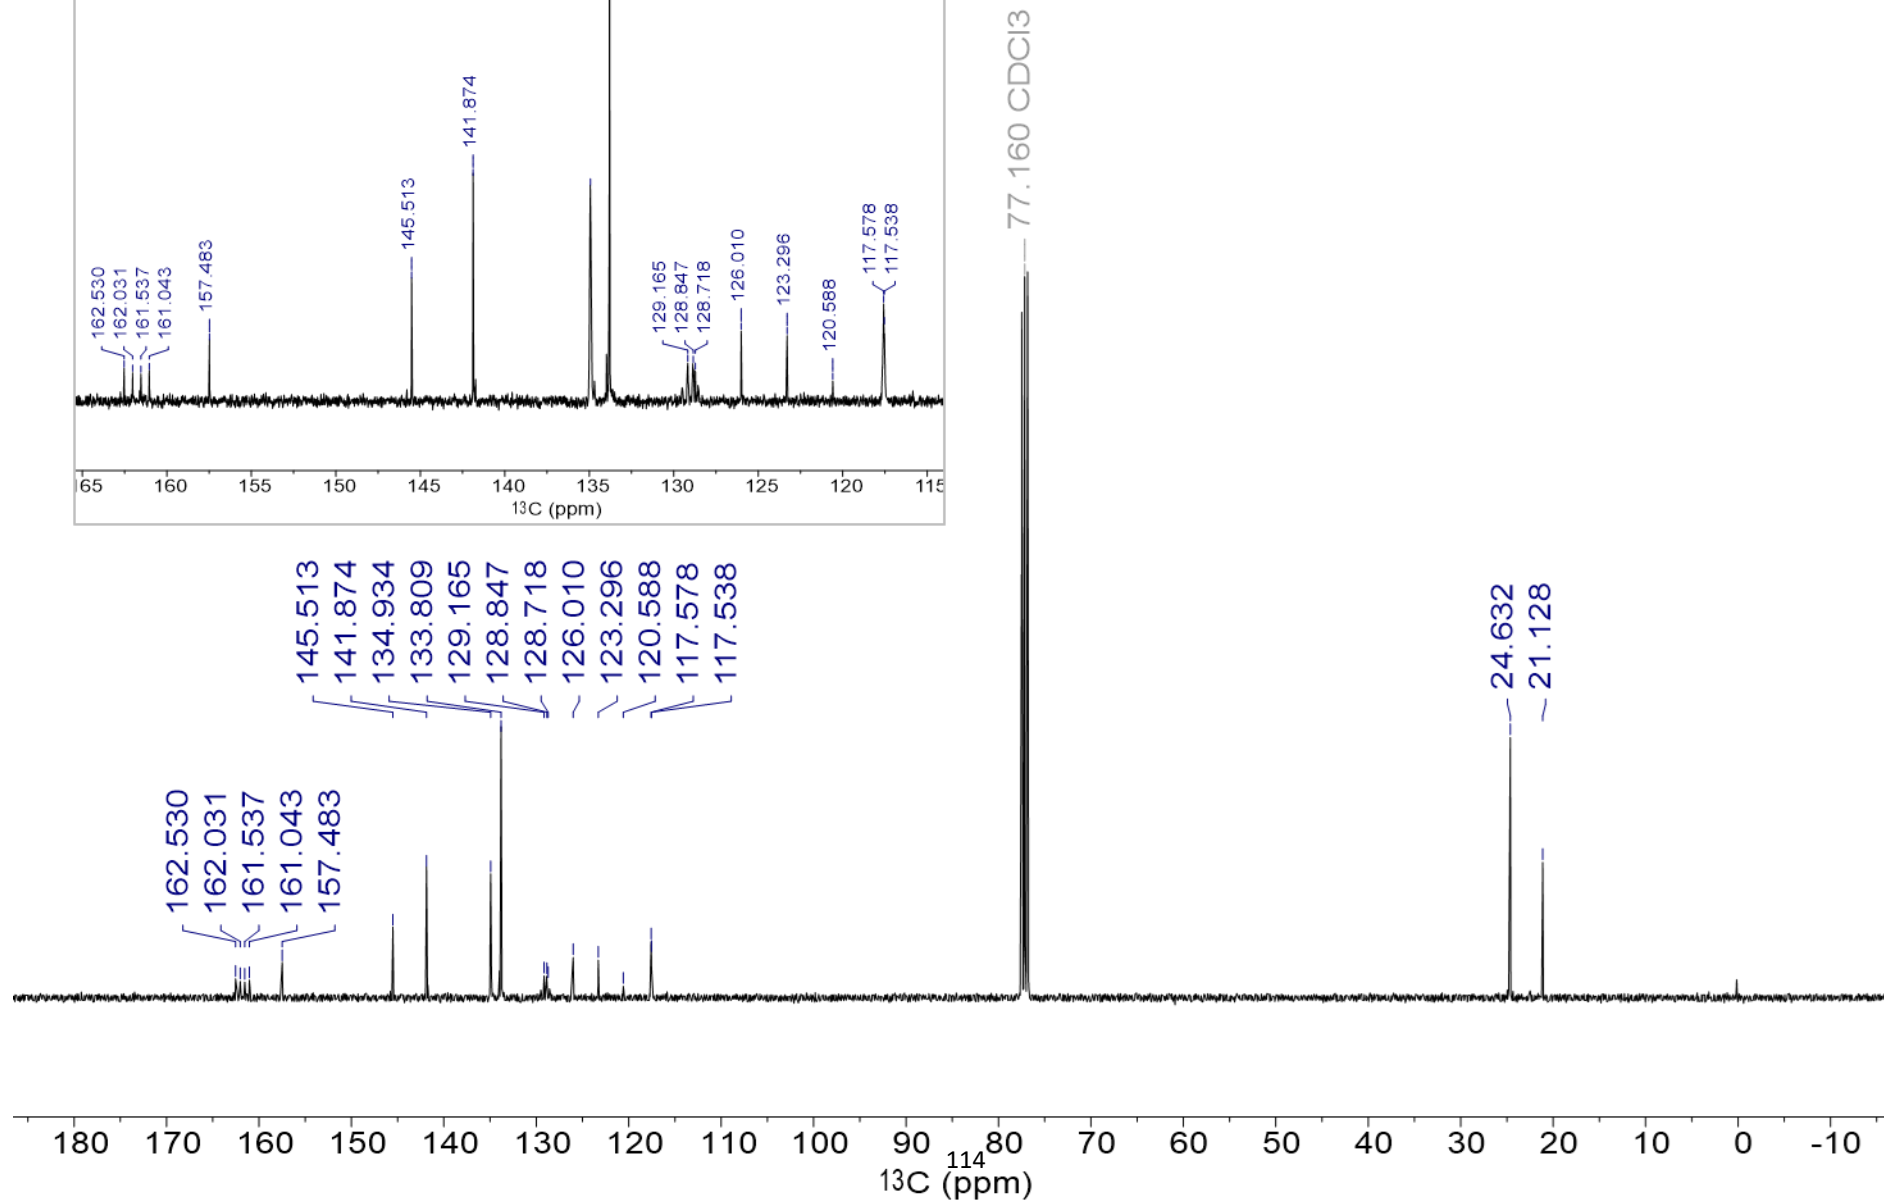

$^{19}\text{F}$  NMR (282 MHz,  $\text{CDCl}_3$ )

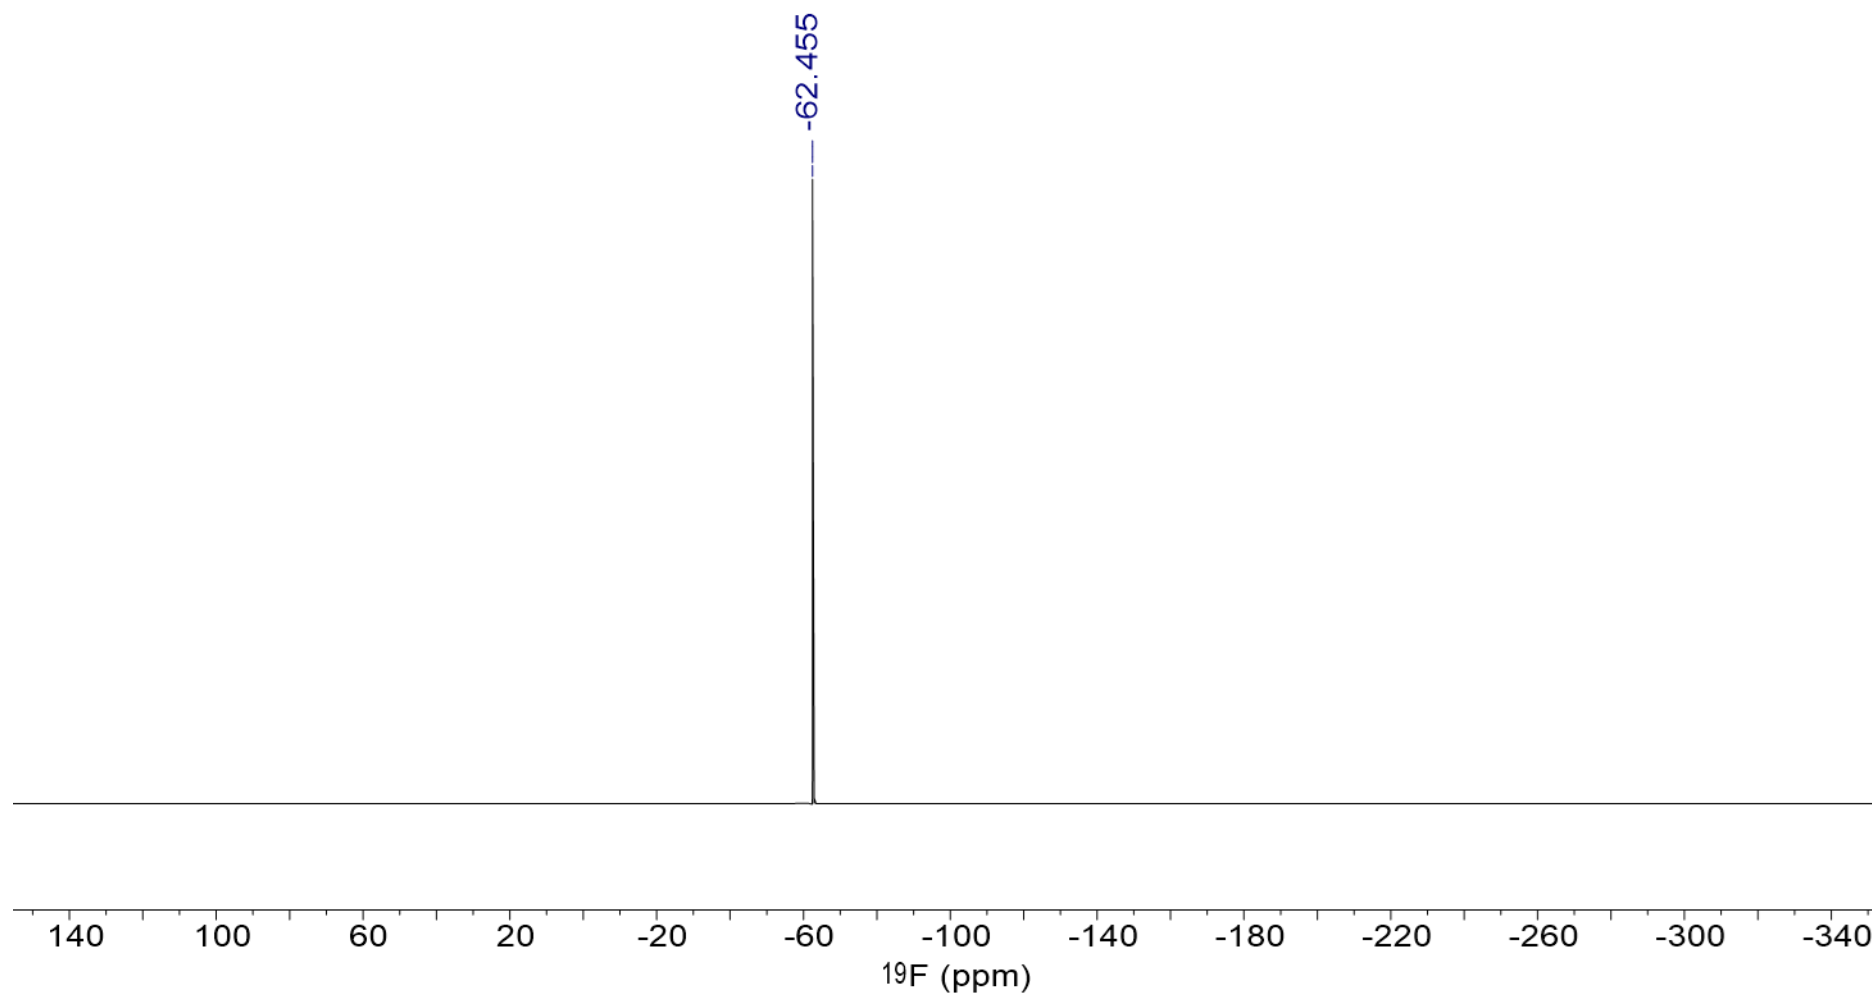

$^1\text{H}$  NMR (600 MHz,  $\text{CDCl}_3$ )

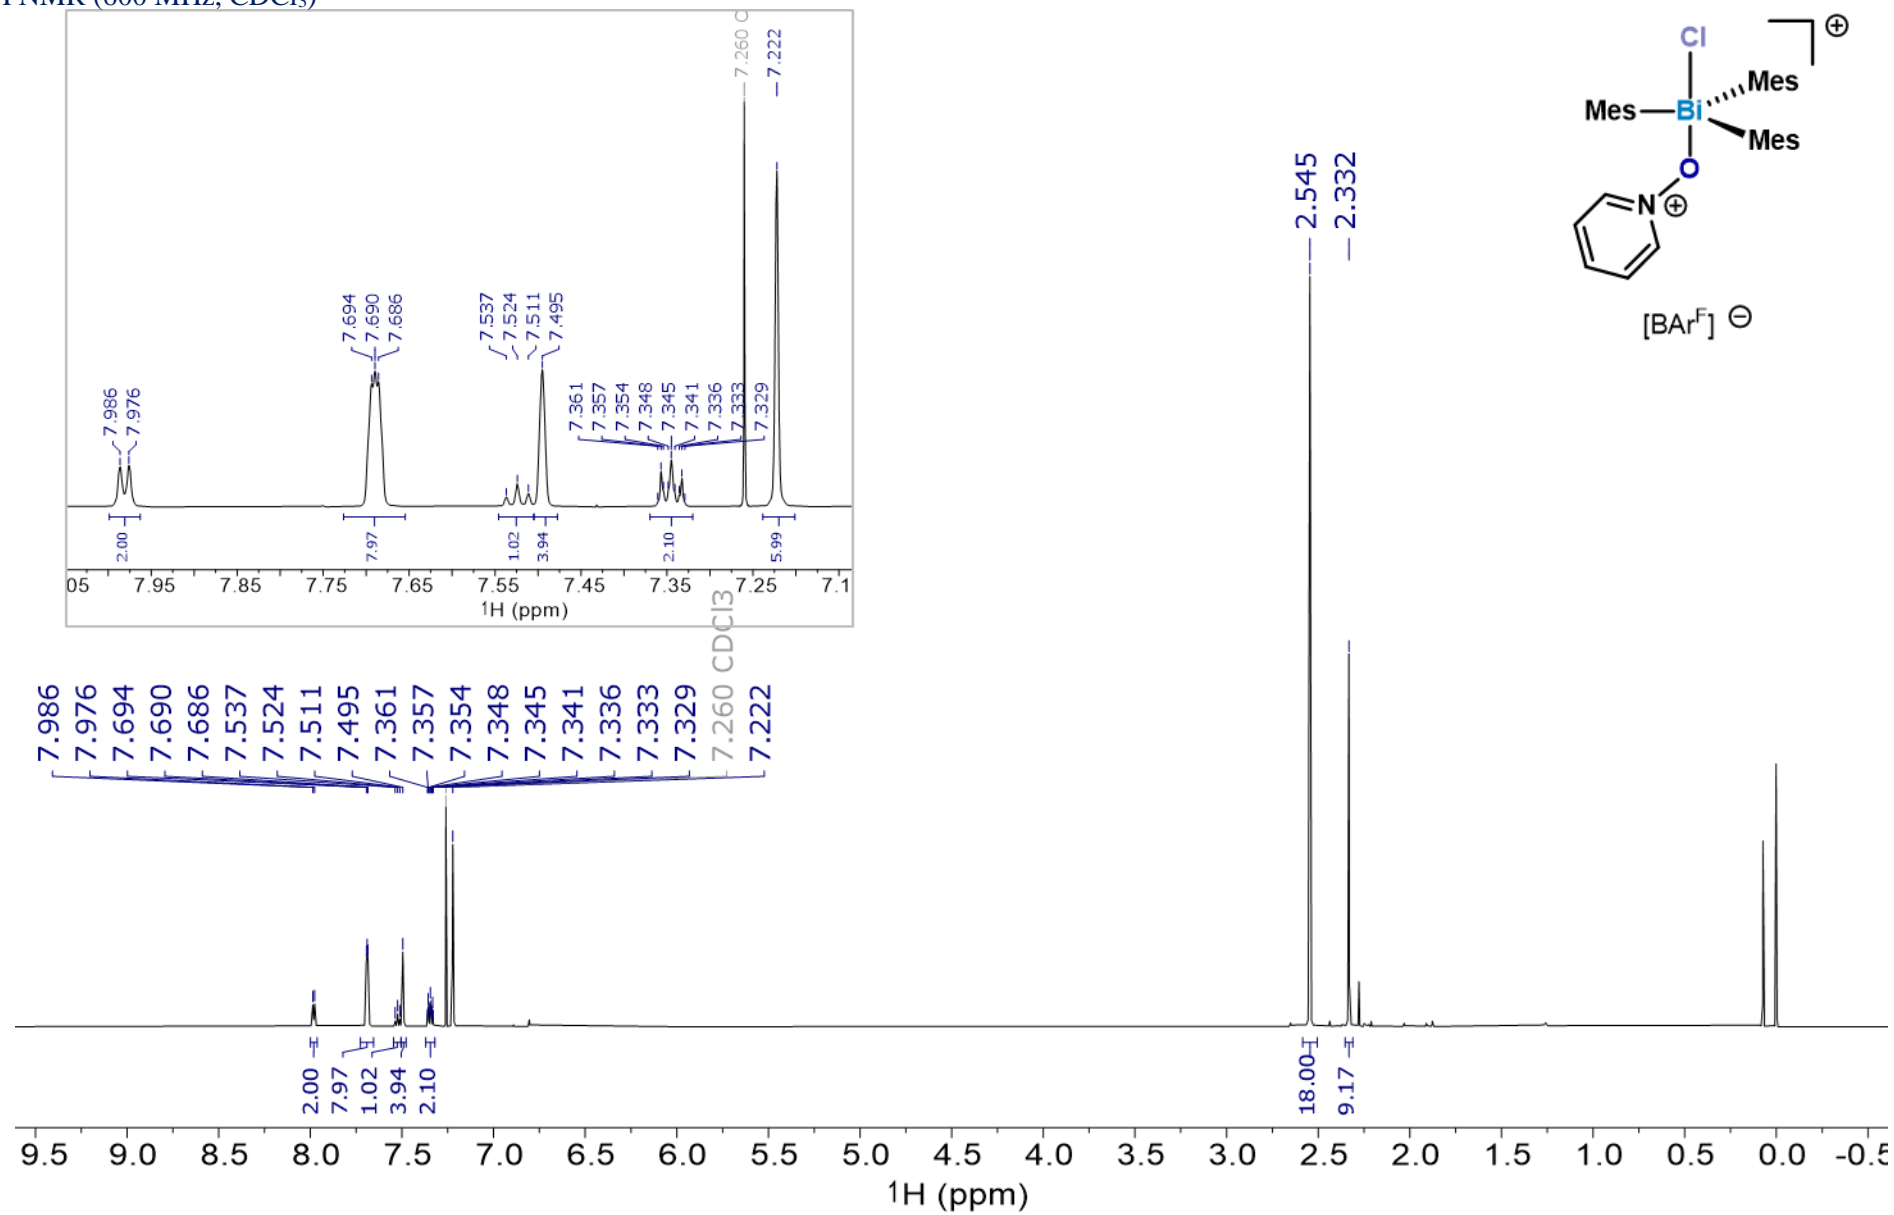

$^{13}\text{C}$  NMR (151 MHz,  $\text{CDCl}_3$ )

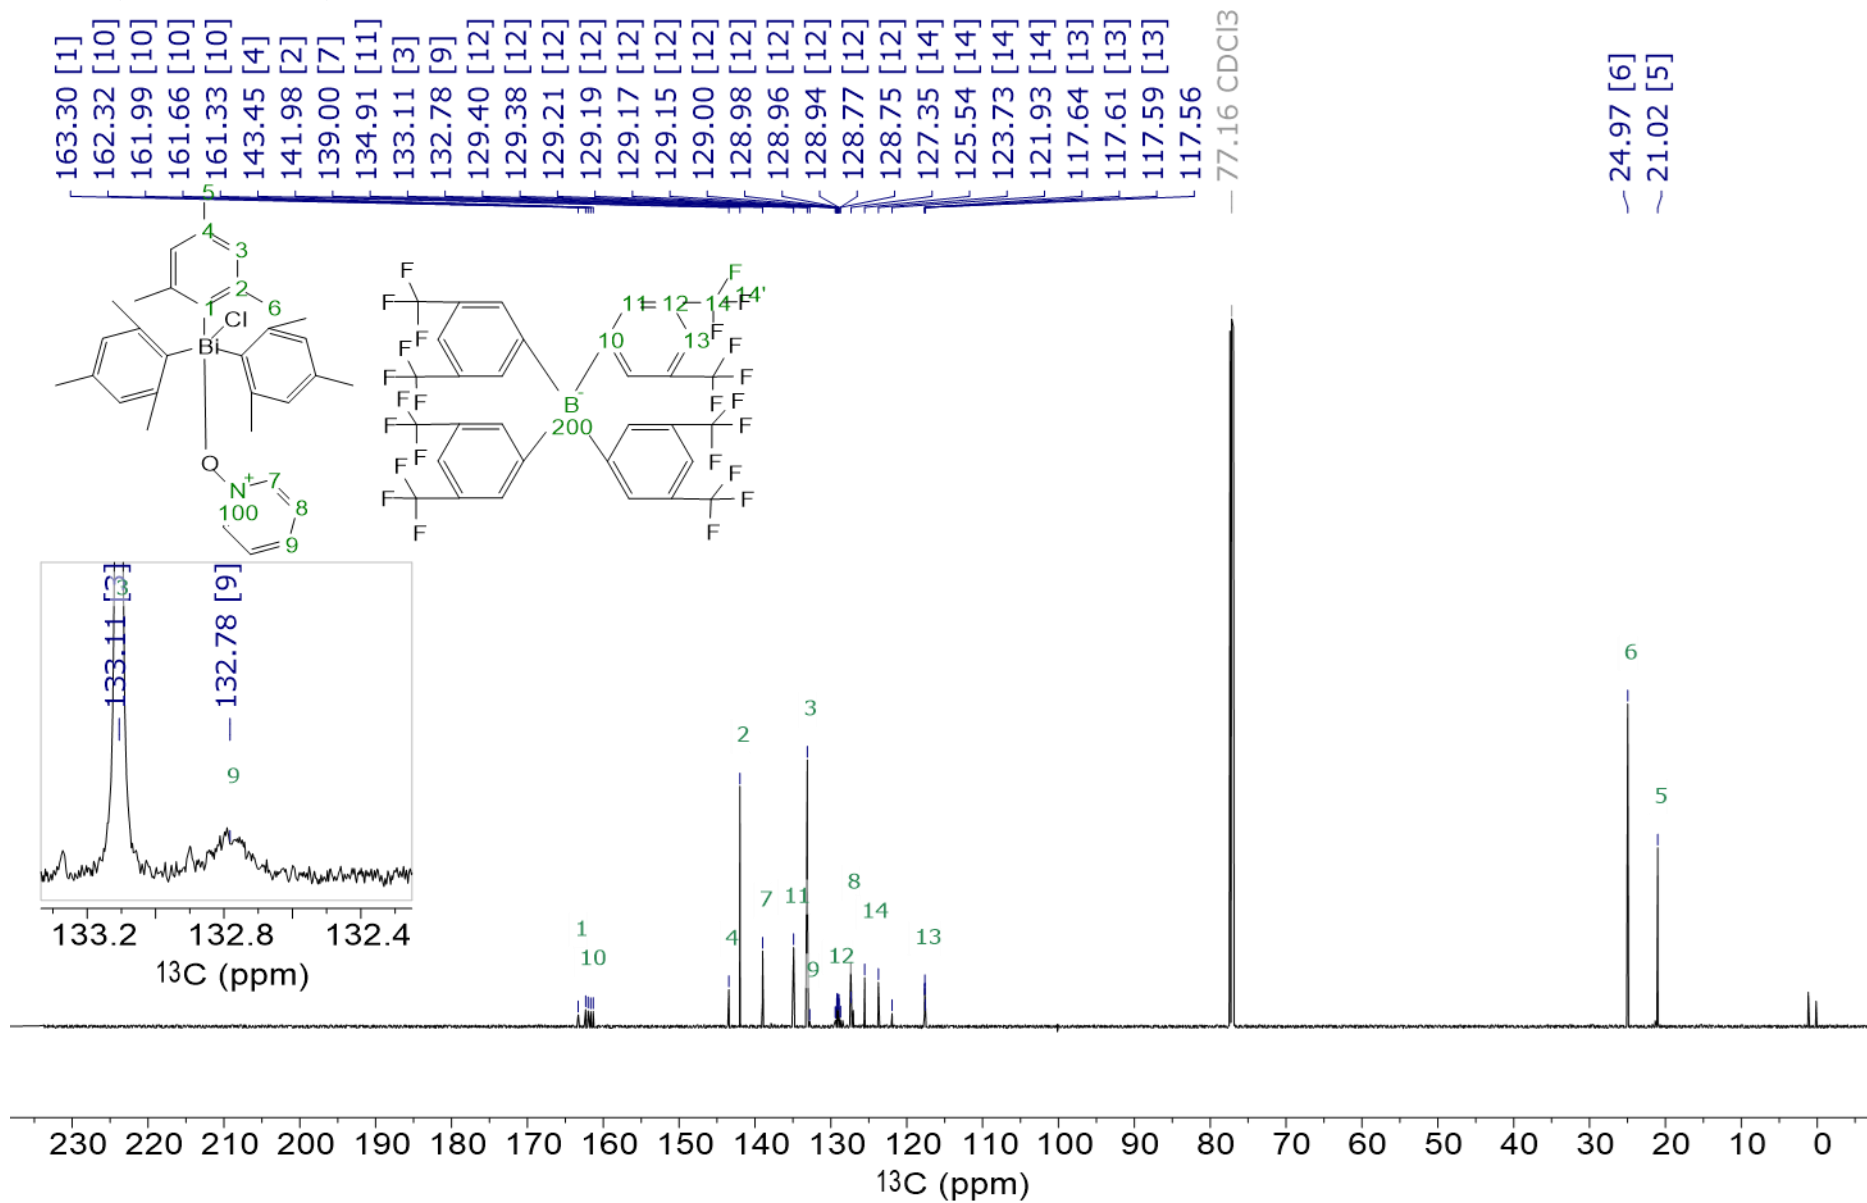

$^1\text{H}$ - $^1\text{H}$  NOESY (600 MHz,  $\text{CDCl}_3$ )

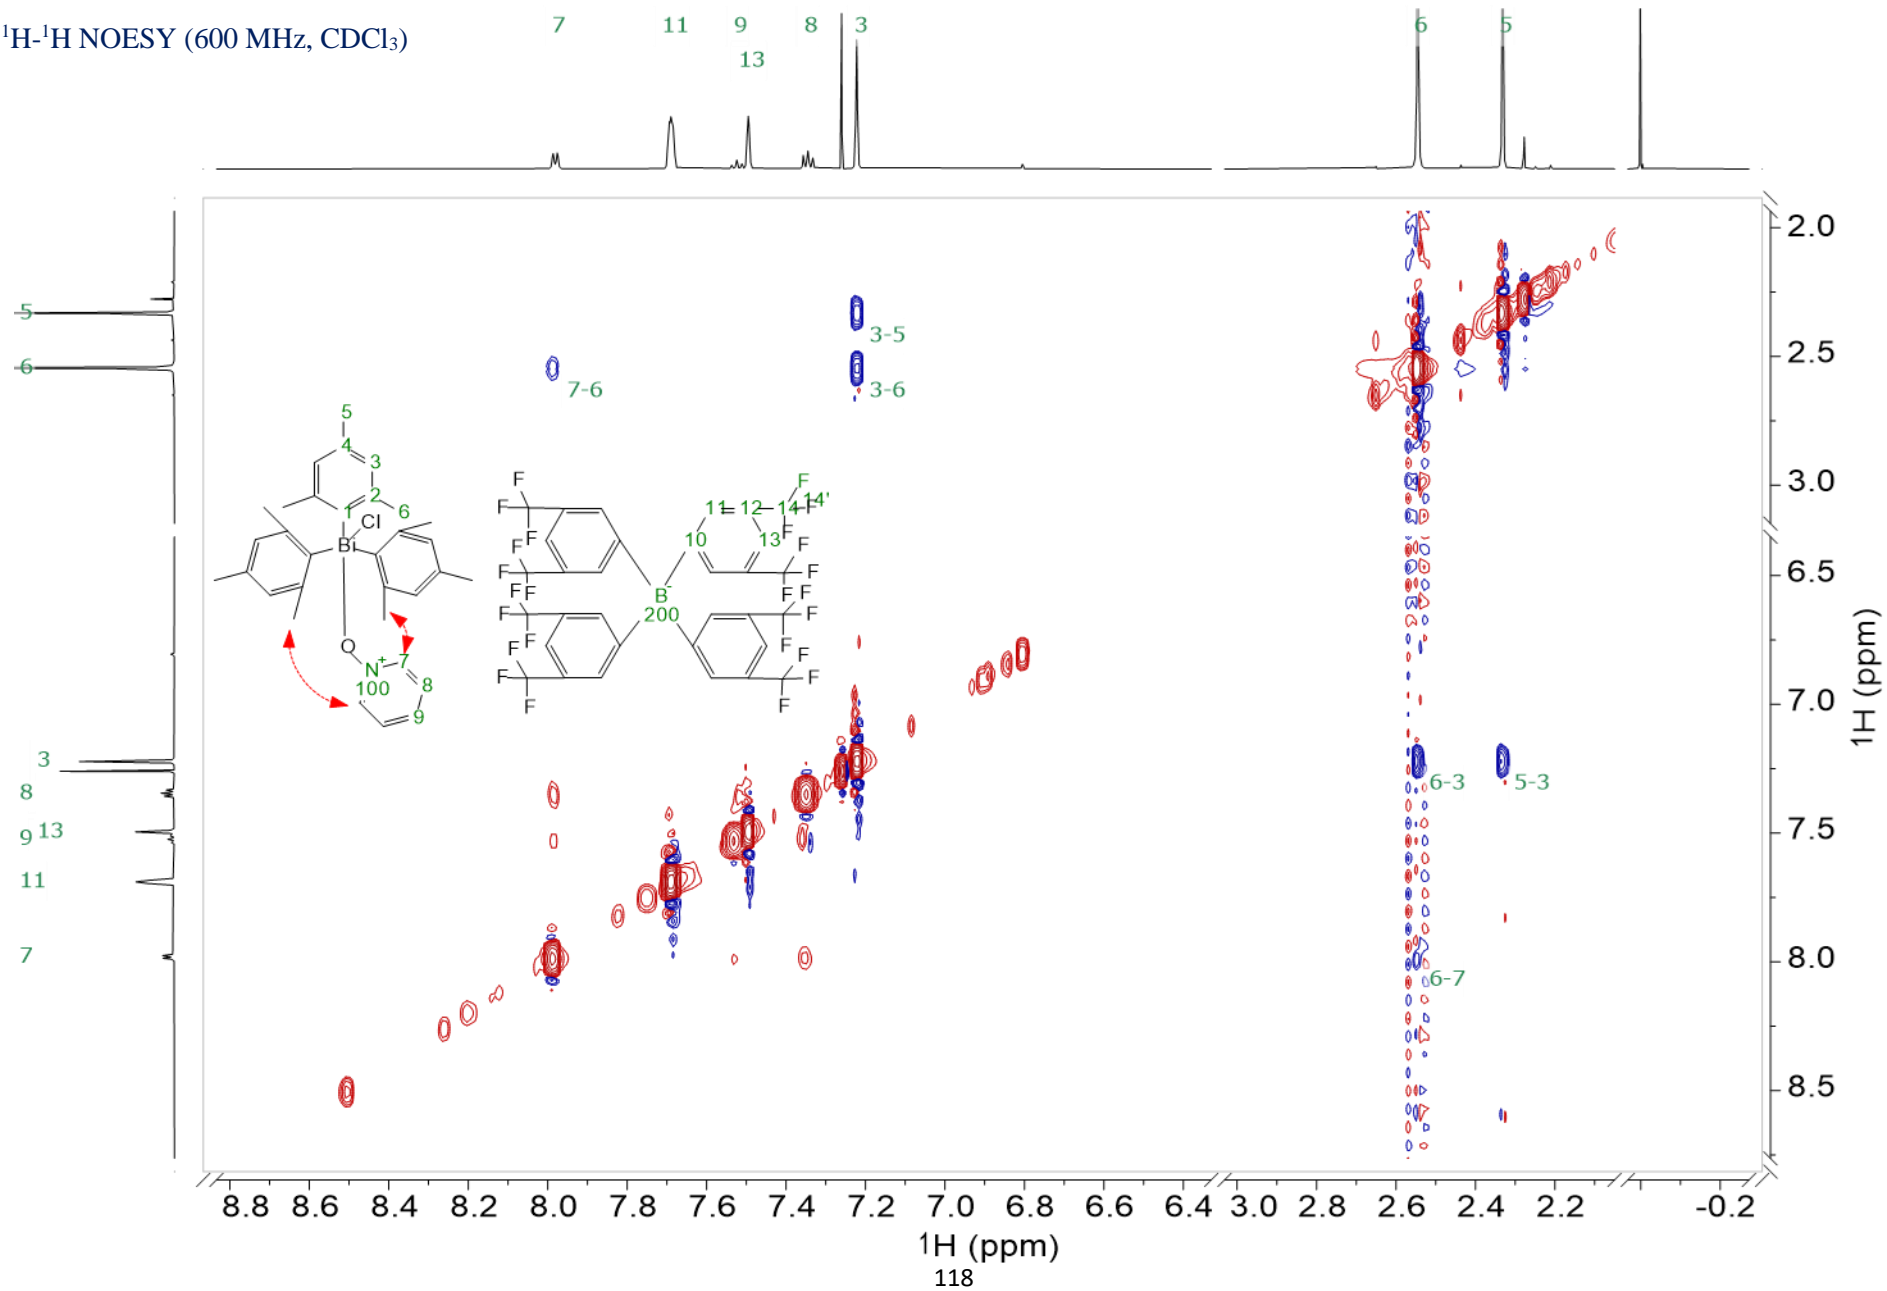

$^1\text{H}$  NMR (300 MHz,  $\text{CD}_2\text{Cl}_2$ )

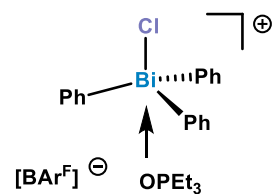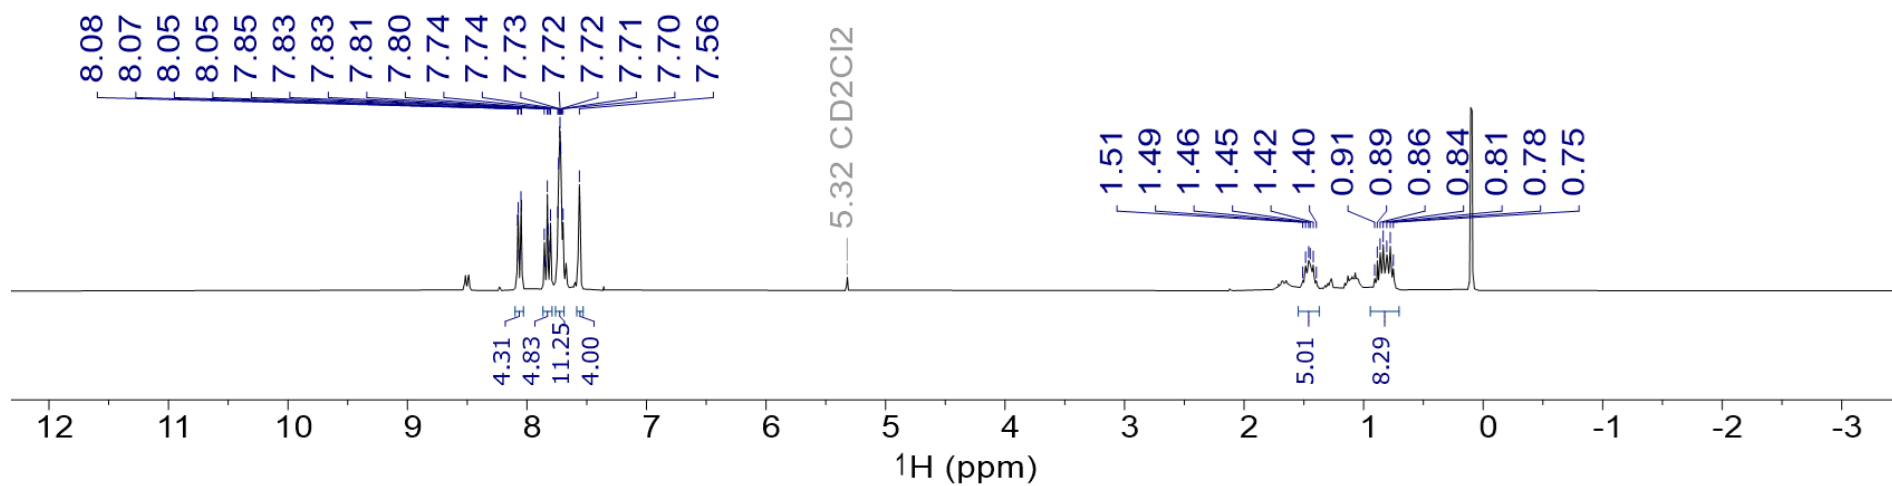

$^{31}\text{P}$  NMR (121.5 MHz,  $\text{CD}_2\text{Cl}_2$ )

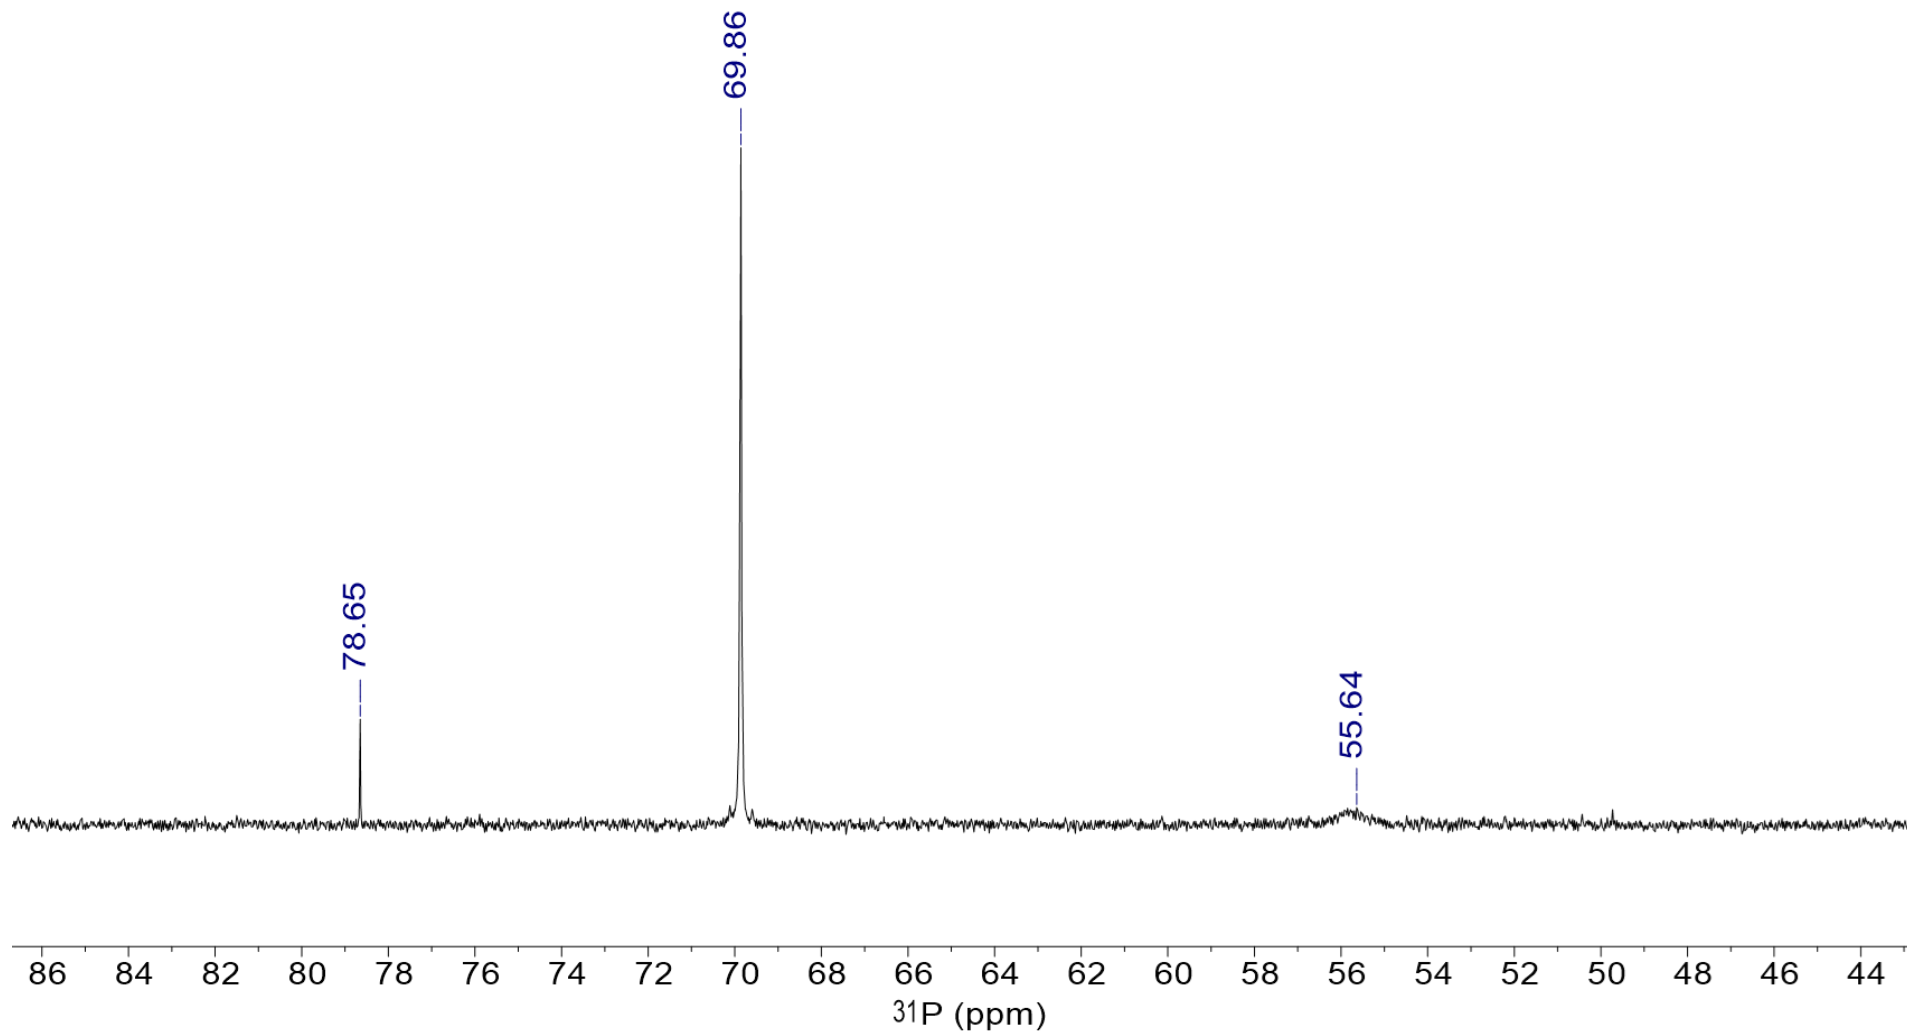



$^1\text{H}$  NMR (300 MHz,  $\text{CD}_2\text{Cl}_2$ )

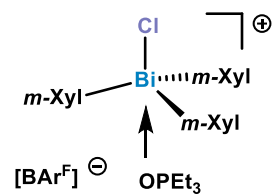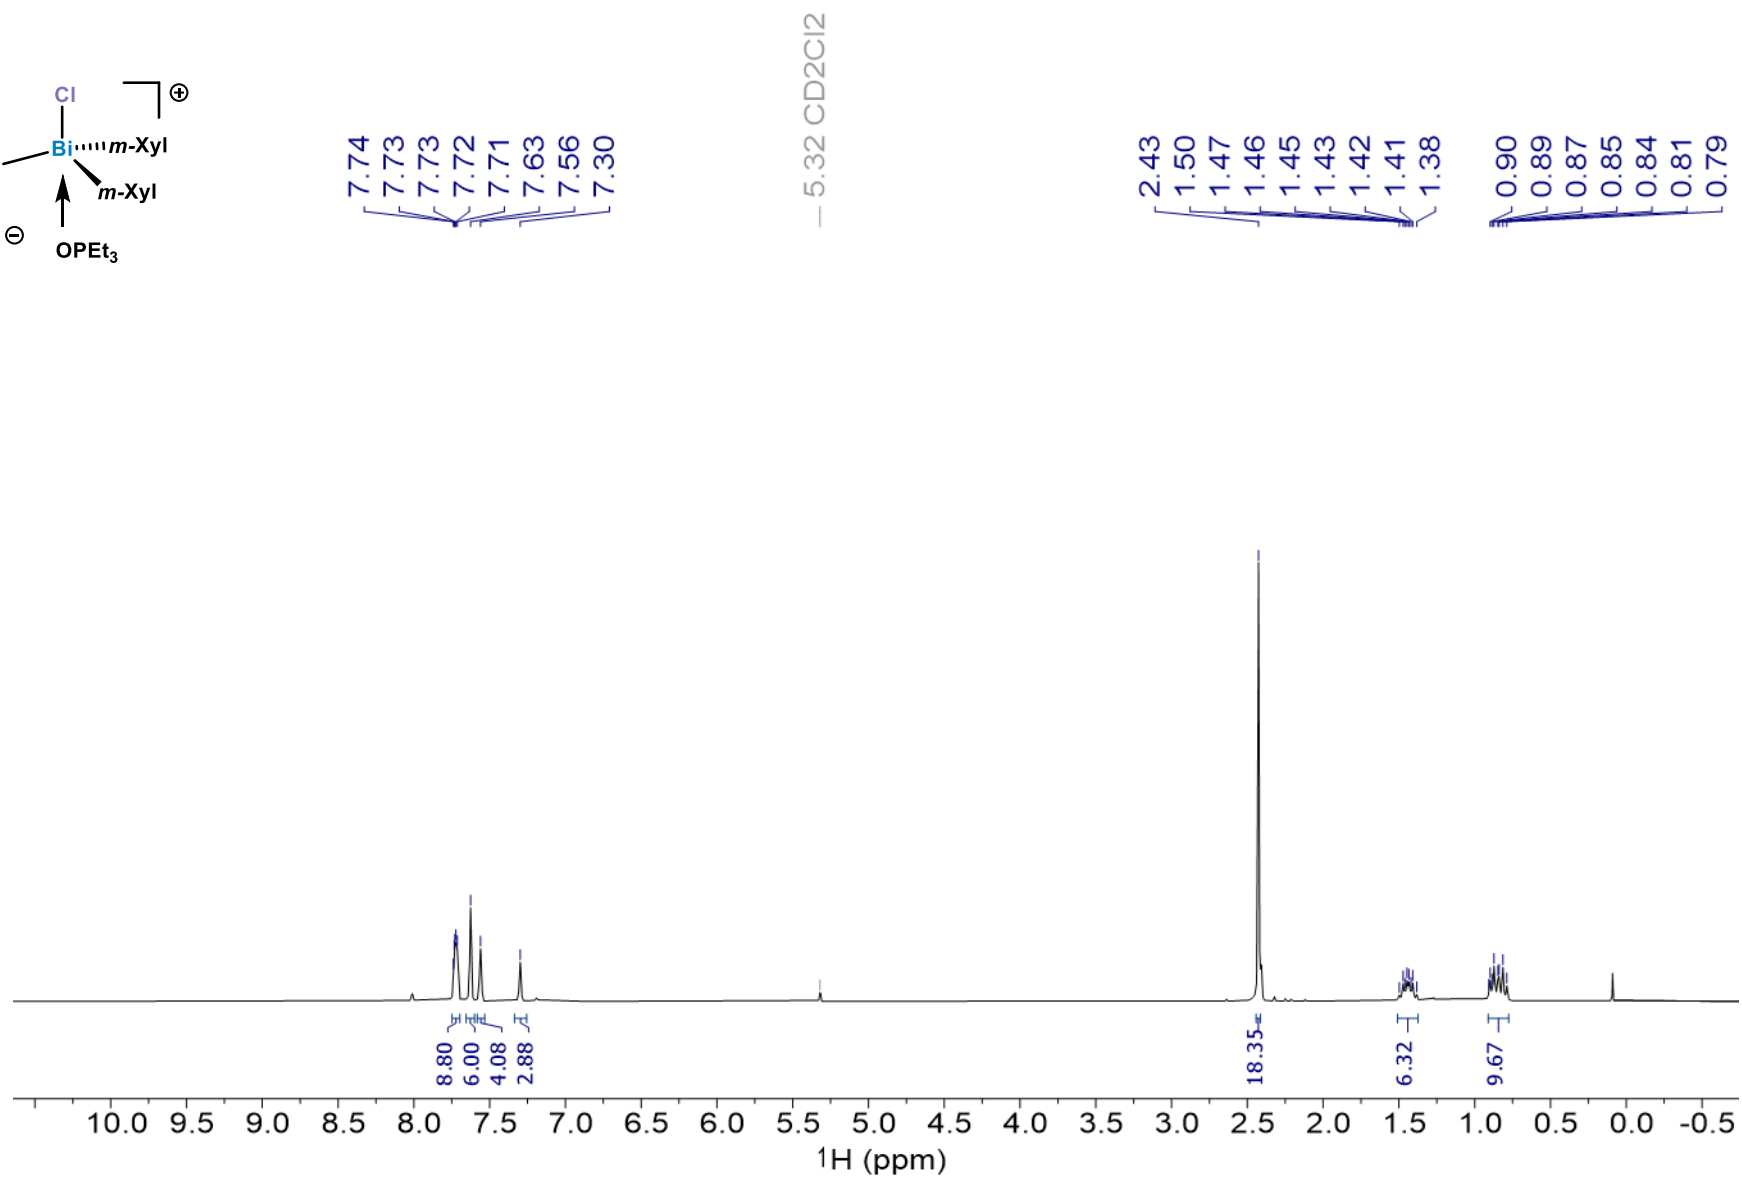

$^{31}\text{P}$  NMR (121.5 MHz,  $\text{CD}_2\text{Cl}_2$ )

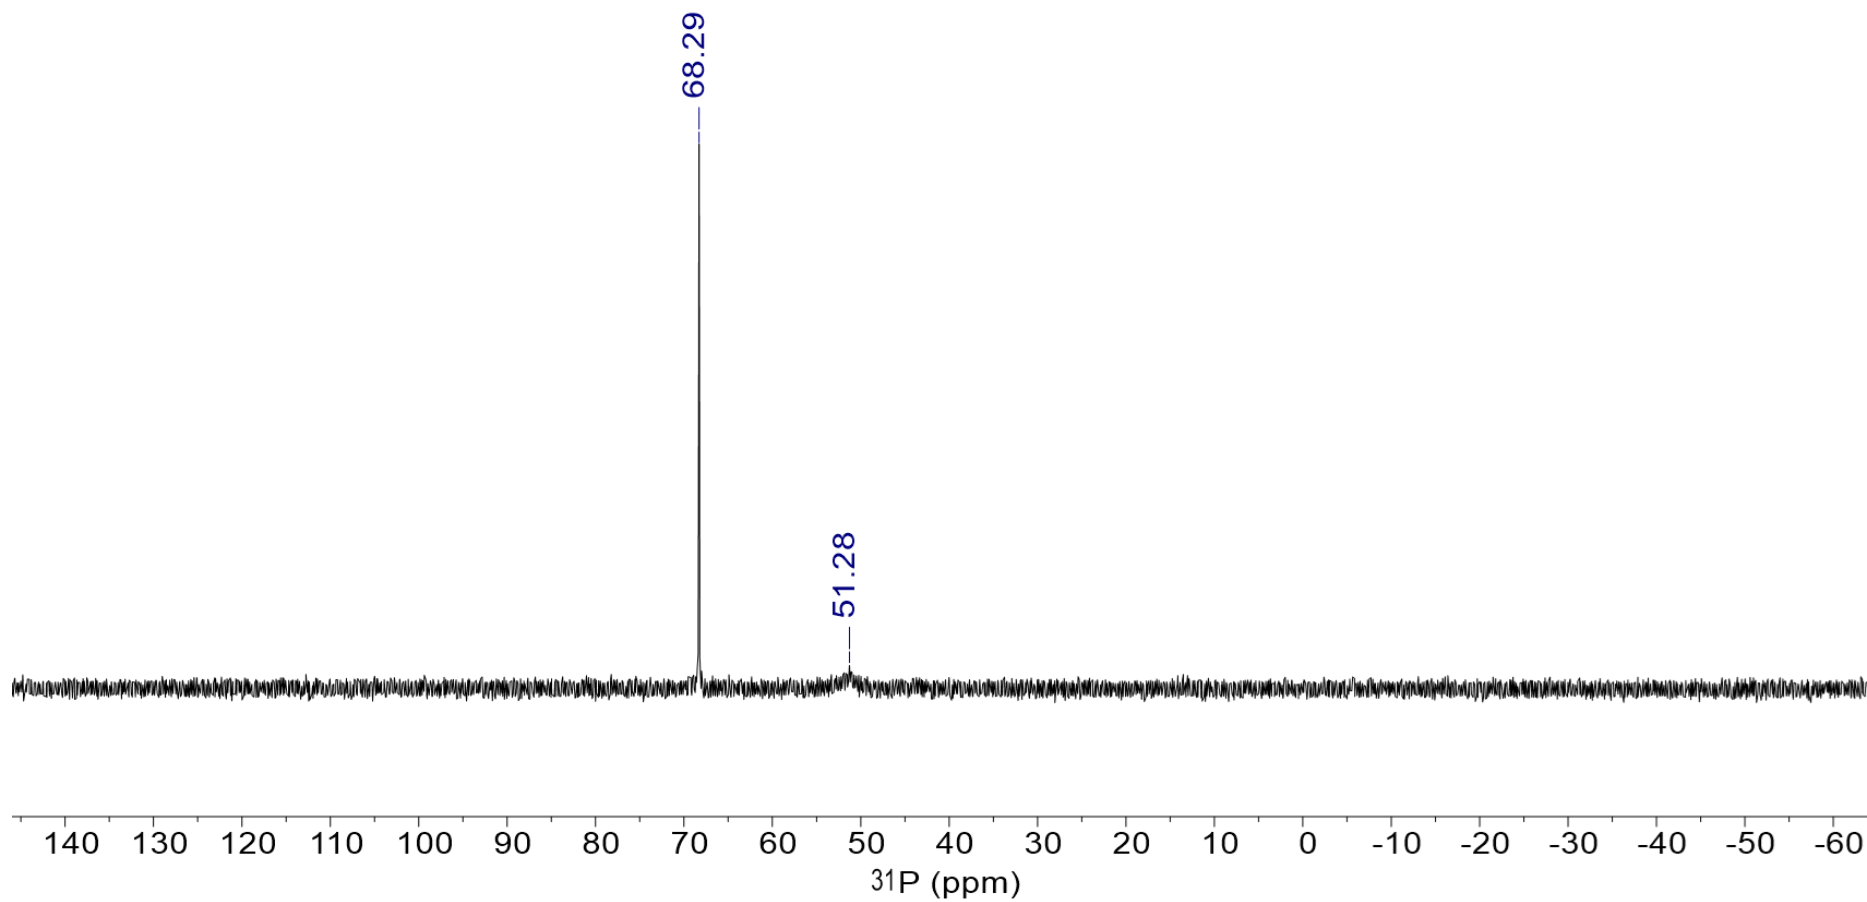

$^1\text{H}$  NMR (300 MHz,  $\text{CD}_2\text{Cl}_2$ )

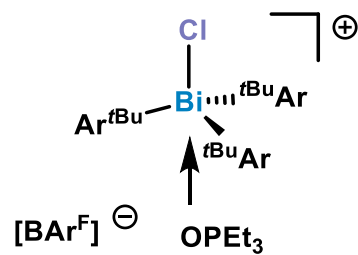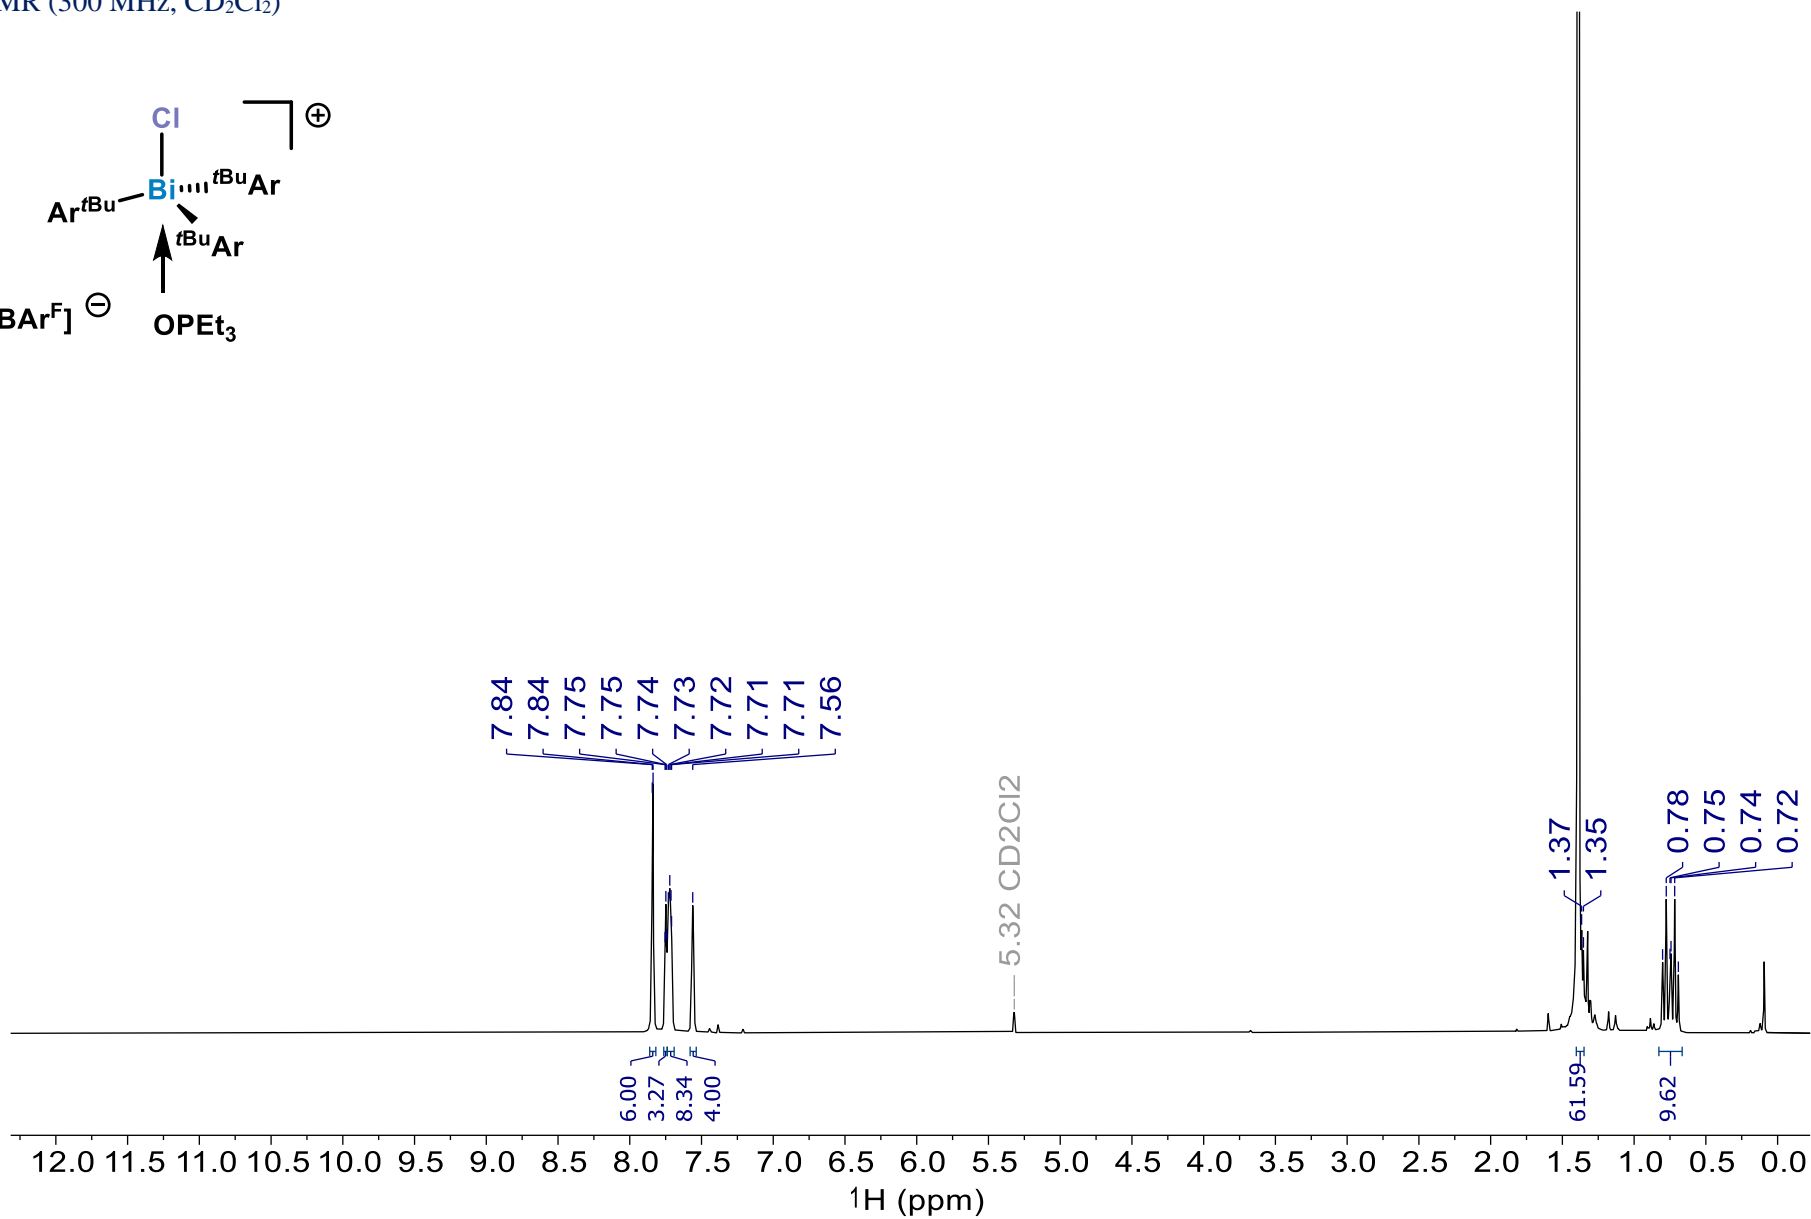

$^{31}\text{P}$  NMR (121.5 MHz,  $\text{CD}_2\text{Cl}_2$ )

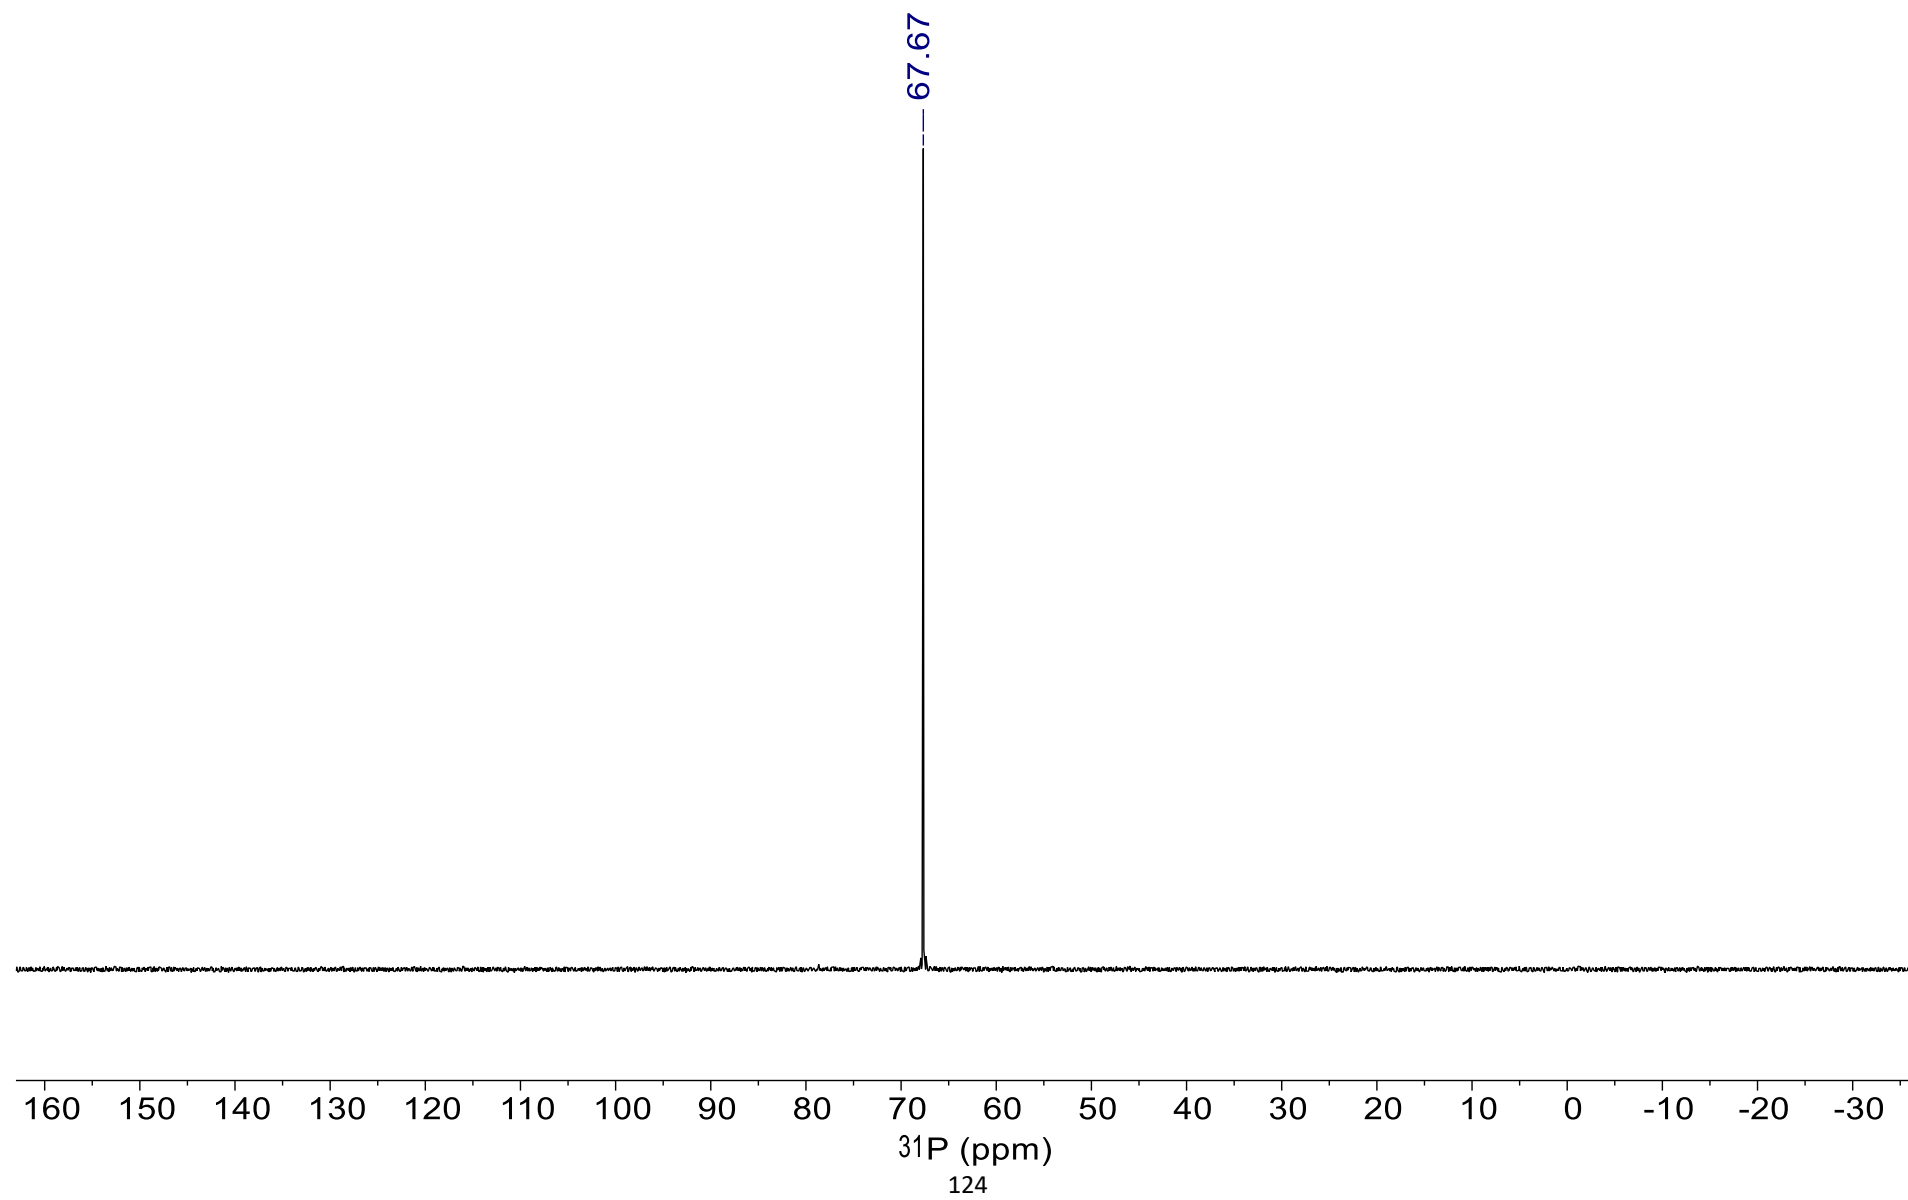

$^1\text{H}$  NMR (300 MHz,  $\text{CD}_2\text{Cl}_2$ )

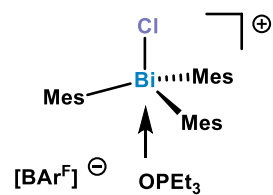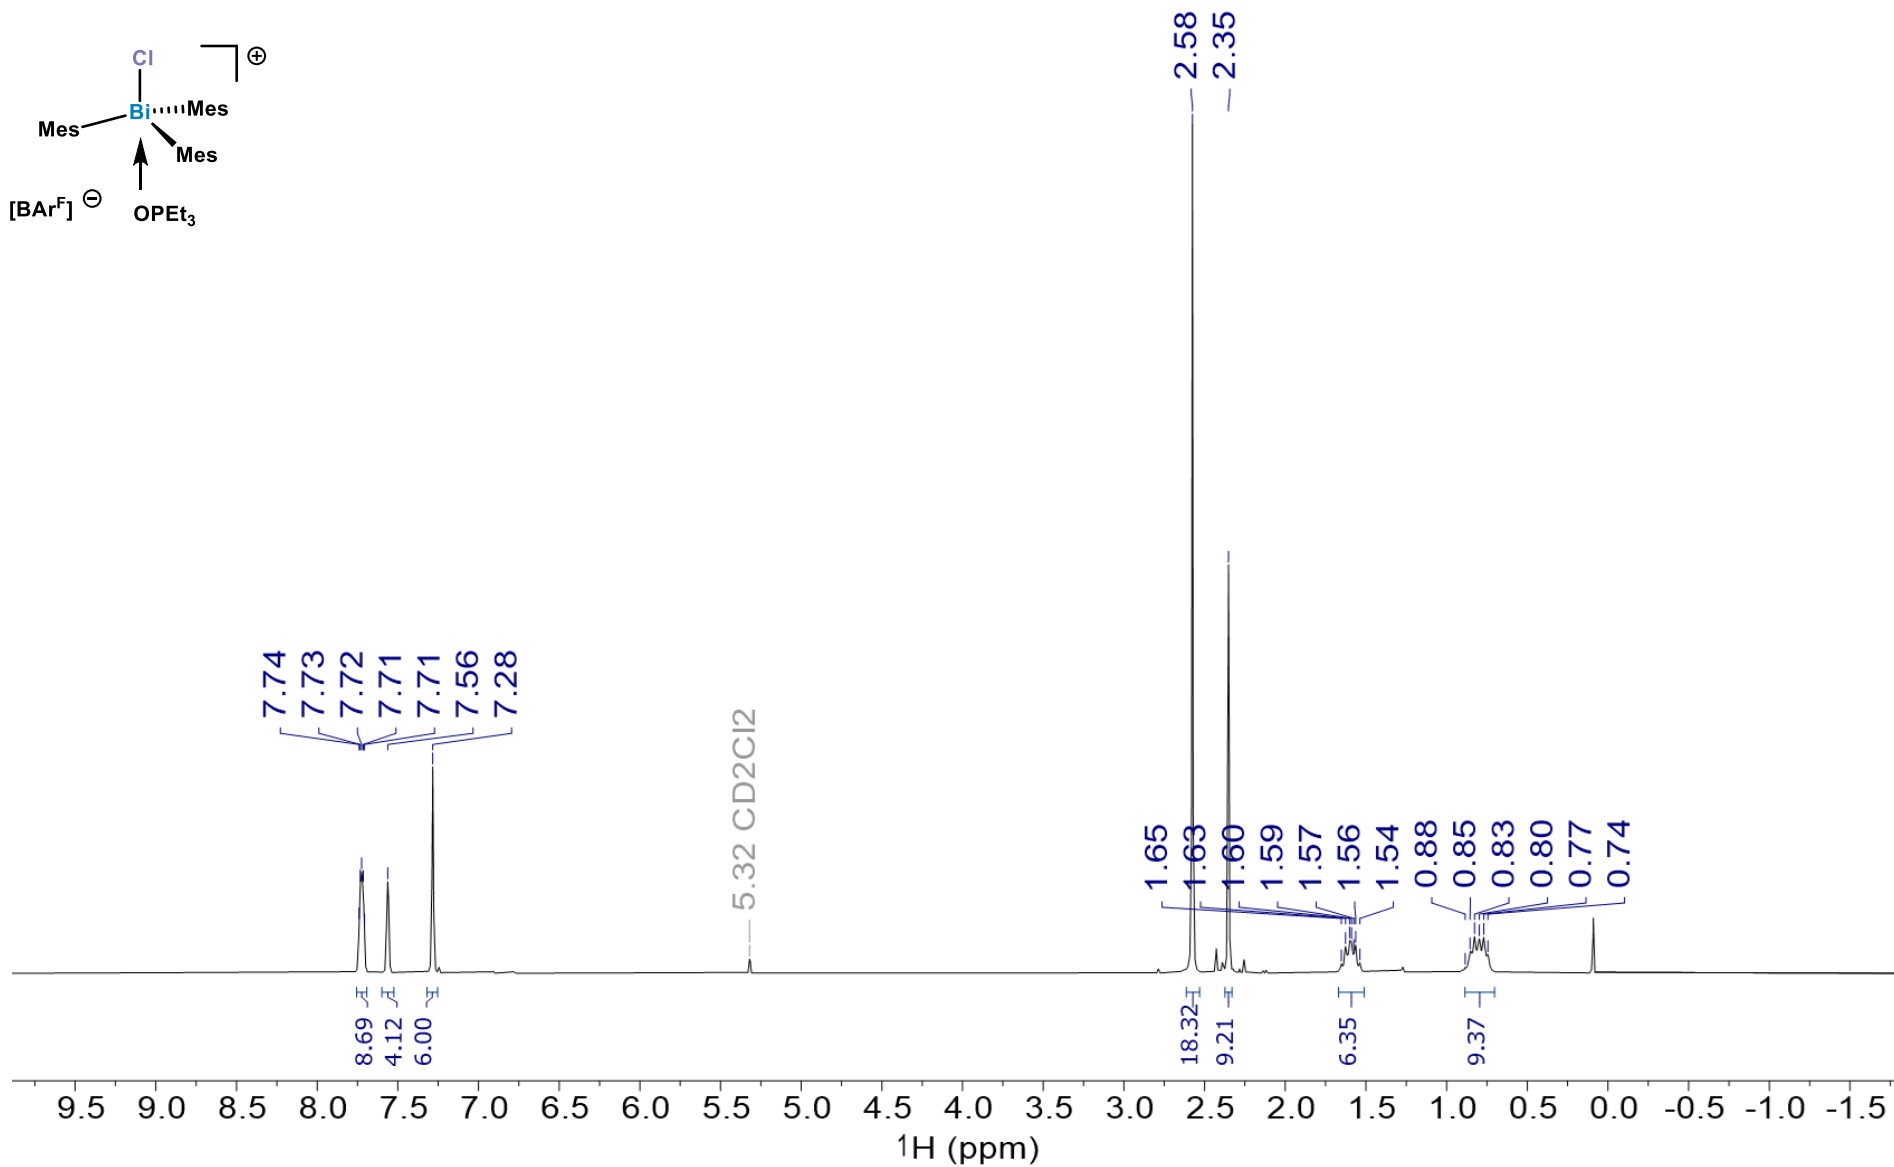

$^{31}\text{P}$  NMR (121.5 MHz,  $\text{CD}_2\text{Cl}_2$ )

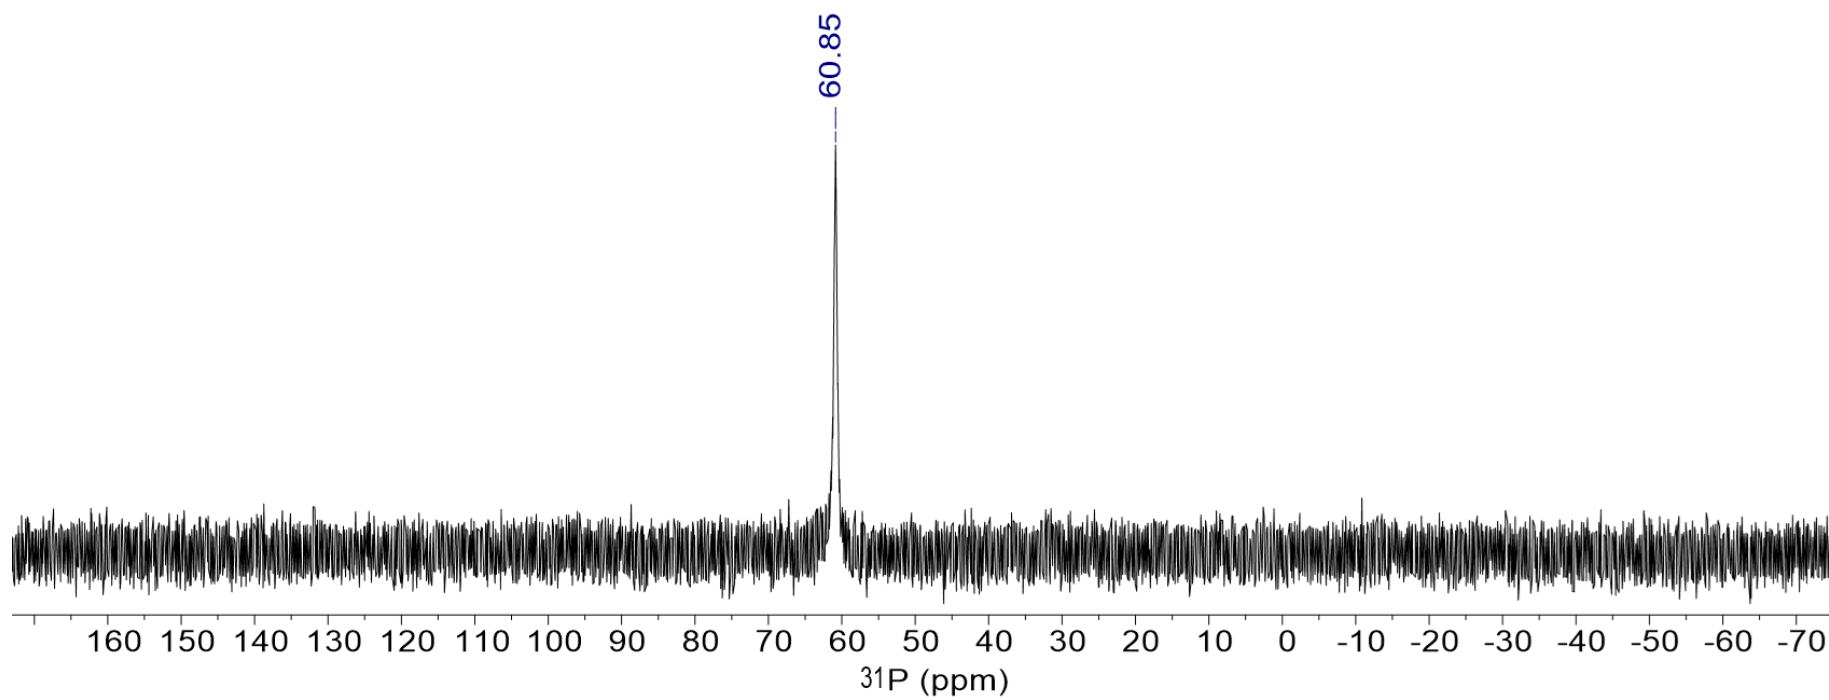

Supplement: d4cc03364g1.pdf [file d4cc03364g1.pdf]
